# Supplementary material for: Drug Resistance in Medulloblastoma Is Driven by YB-1, ABCB1 and a Seven-Gene Drug Signature
Source: MDPI journal article supplement (doi:10.3390/cancers15041086), 2023-02-08
Supplement: s1 [file s1]

## Supplementary Results File SA

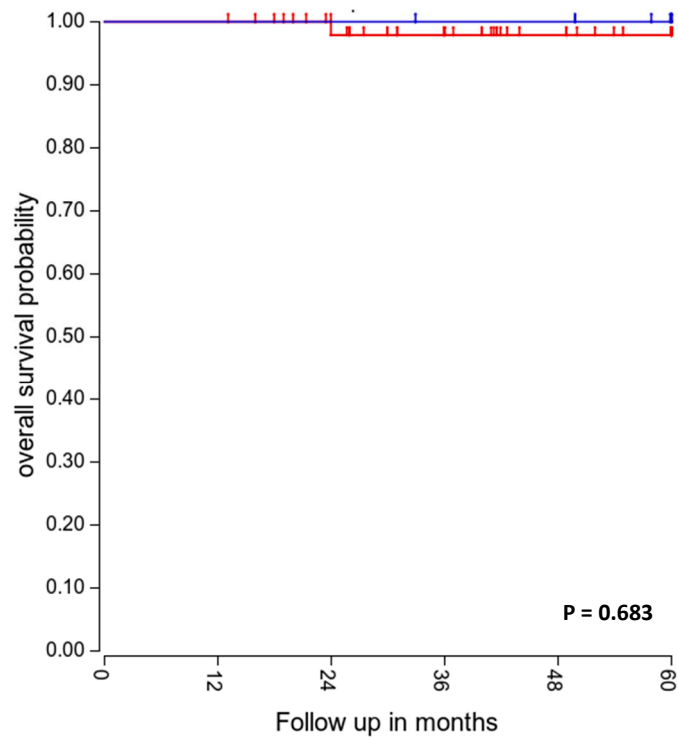

**Supplementary Figure S1. YB-1 gene expression does not correlate with survival outcomes in WNT medulloblastoma.** R2 genomics analysis (<http://r2.amc.nl>) was employed to explore correlation between YB-1 gene expression and survival in WNT subgroup medulloblastoma. Kaplan Meier analysis showed no association between YB-1 expression and 5 year overall survival probability in patients with WNT medulloblastoma (P = 0.683). N = 70 [1]. Survival curves compared using the Log-rank (Mantel-Cox) test.

A

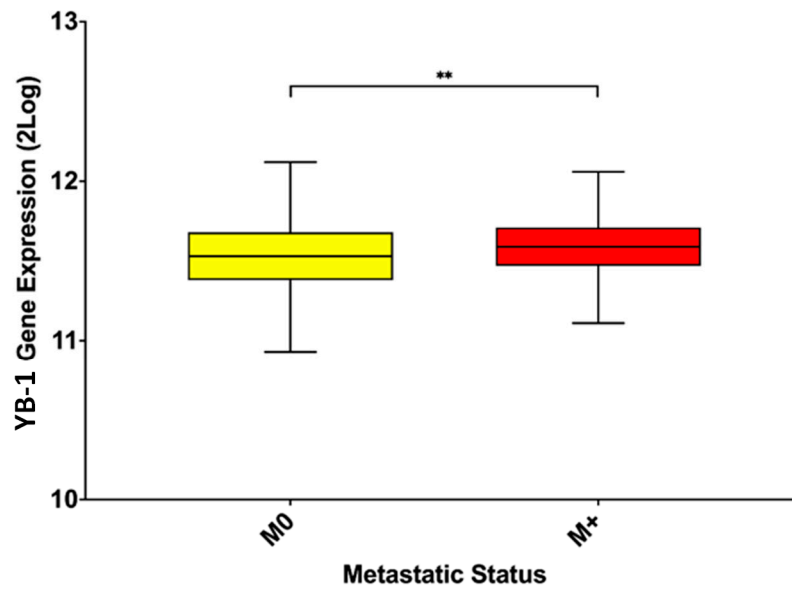

B

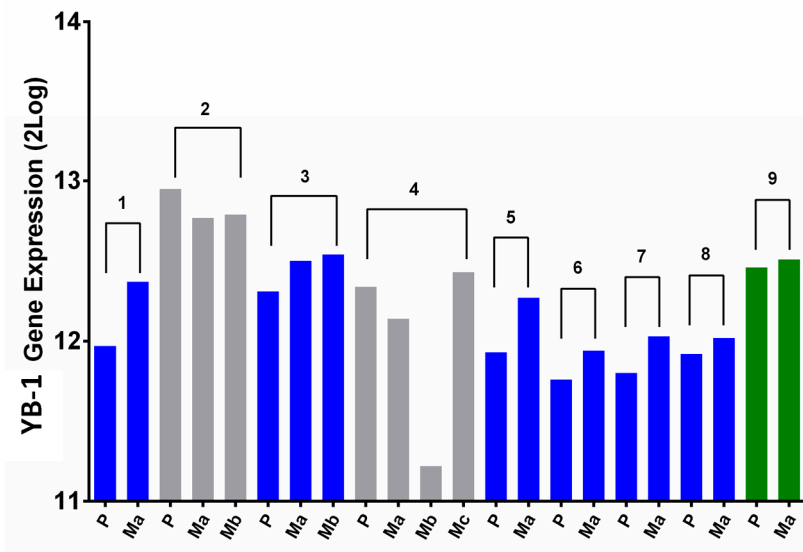

**Supplementary Figure S2. YB-1 gene expression is elevated in metastatic tumours.** A) YB-1 gene expression was found to be significantly higher in metastatic tumours (M+; n = 176) compared to non-metastatic tumours (M0; n = 397); \*\*P < 0.01 [1]. Significance analysed by unpaired t-test with Welch's correction. B) YB-1 expression was frequently elevated in metastatic tumours when compared with the appropriate primary pair. N = 22 [2]. P represents primary tumour and Ma/b/c represent first/second/third metastases. Brackets define the samples attributed to each patient. SHH-classified tumours are denoted in green, Group 3 tumours in grey and Group 4 tumours in blue.

**A**

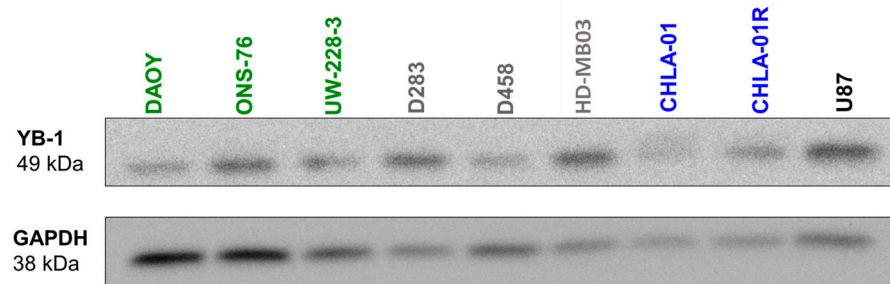

**B**

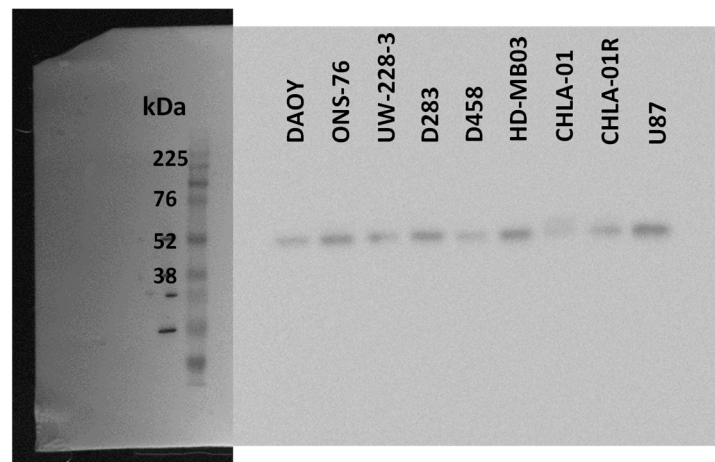

**C**

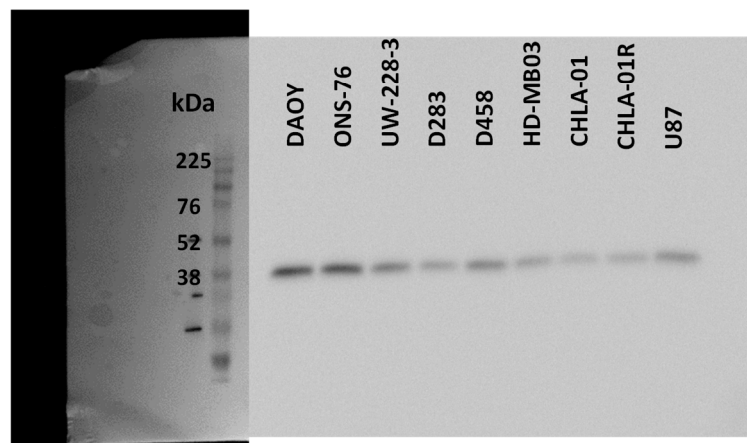

**Supplementary Figure S3. YB-1 is expressed across a range of medulloblastoma cell lines.** A) A representative western blot for total YB-1 expression across SHH, Group 3 and Group 4 established medulloblastoma cell lines. GAPDH served as a loading control. B) Full length western blot for YB-1 expression (49 kDa). C) Full length western blot for GAPDH expression (36 kDa). Protein expression was visualised and quantified by chemiluminescence imaging.

**A**

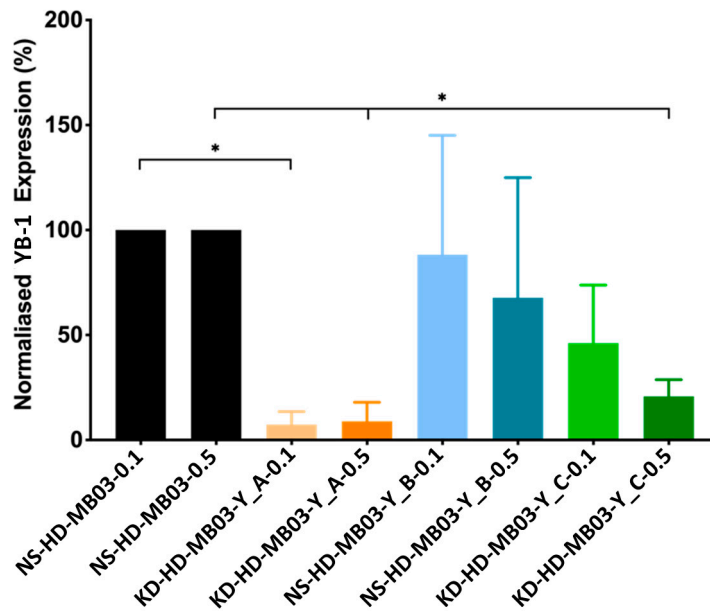

**B**

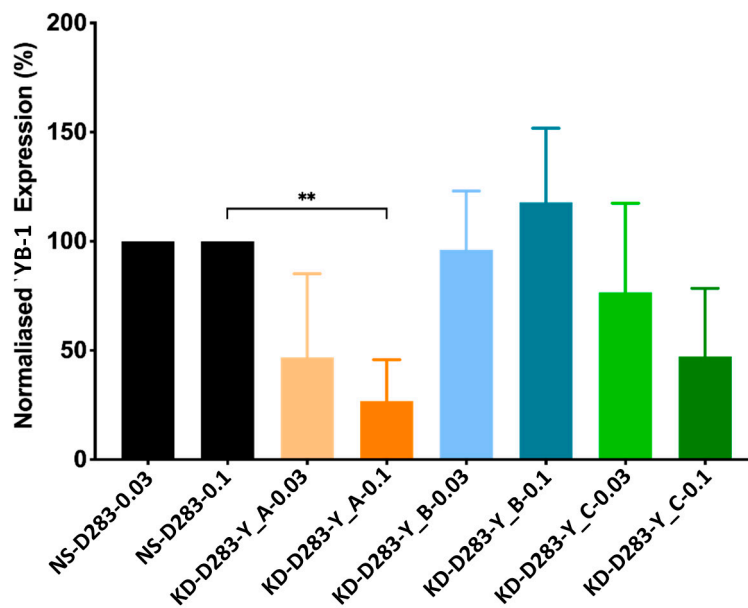

**Supplementary Figure S4. shRNA-mediated knockdown of YB-1 effectively depletes YB-1 mRNA expression in HD-MB03 and D283 Group 3 medulloblastoma cell lines.** A) In HD-MB03 cells, YB-1 mRNA was significantly depleted using the YB-1\_A shRNA construct at a multiplicity of infection (MOI) of 0.1 and 0.5 (KD-HD-MB03-Y\_A-0.1 and KD-HD-MB03-Y\_A-0.5) and the YB-1\_C construct at an MOI of 0.5 (KD-HD-MB03-Y\_C-0.5), compared to the appropriate non-silencing control cell line (NS-HD-MB-03-Y\_A-0.1 and NS-HD-MB03-Y\_A-0.5). B) In D283 cells, YB-1 was significantly depleted using the YB-1\_A shRNA construct at an MOI of 0.1 (KD-D283-Y\_A-0.1) compared to the non-silencing control (NS-D283-Y\_A-0.1). Accordingly, the YB-1\_A construct at an MOI of 0.1 would be taken forward for further experiments. Relative YB-1 expression displayed as fold change ( $2^{-\Delta\Delta Cq}$ ) relative to the appropriate non-silencing control. n = 3; mean  $\pm$  SEM; \*\*P < 0.01; \*P < 0.05. Significance assessed by ordinary one-way ANOVA analysis with Sidak's multiple comparisons test.

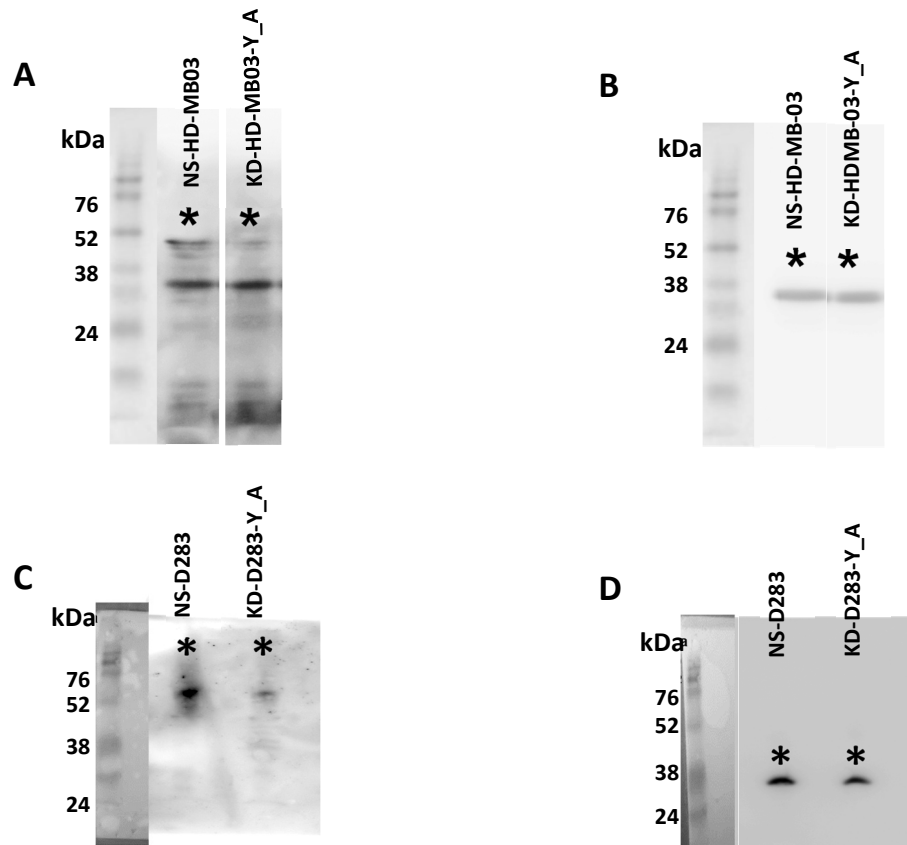

**Supplementary Figure S5. shRNA-mediated knockdown of YB-1 mRNA effectively depletes YB-1 protein expression in HD-MB03 and D283 Group 3 medulloblastoma cell lines.** A) Full western blot for total YB-1 expression across NS-HD-MB-03 and KD-HD-MB03-Y\_A cell lines (bands of interest marked by asterisk, 49 kDa; lower band represents GAPDH, visualised due to the use of a common secondary antibody). B) Full western blot for total GAPDH expression across NS-HD-MB03 and KD-HD-MB03-Y\_A cell lines (bands of interest marked by asterisk; 36 kDa). C) Full western blot for total YB-1 expression across NS-D283 and KD-D283-Y\_A cell lines (bands of interest marked by asterisk; 49 kDa). D) Full western blot for total GAPDH expression across NS-D283 and KD-D283-Y\_A cell lines (bands of interest marked by asterisk; 36 kDa).

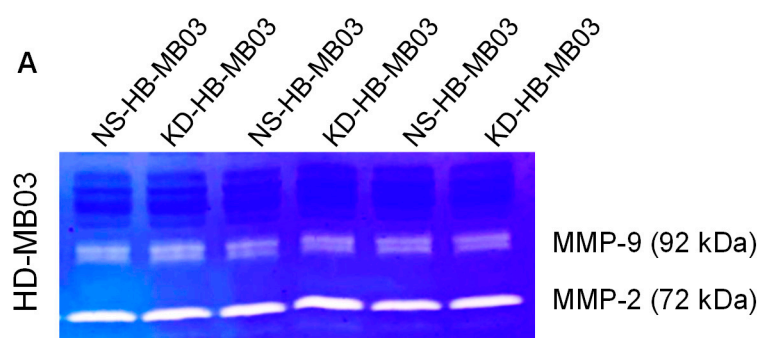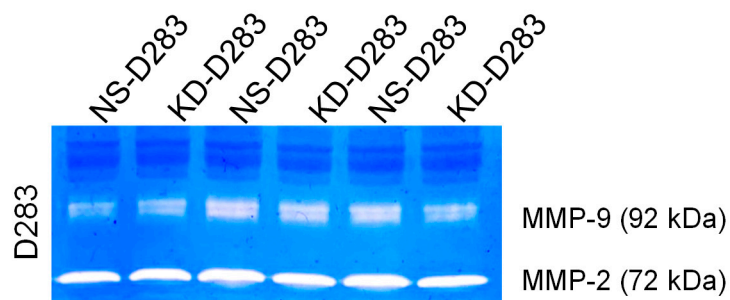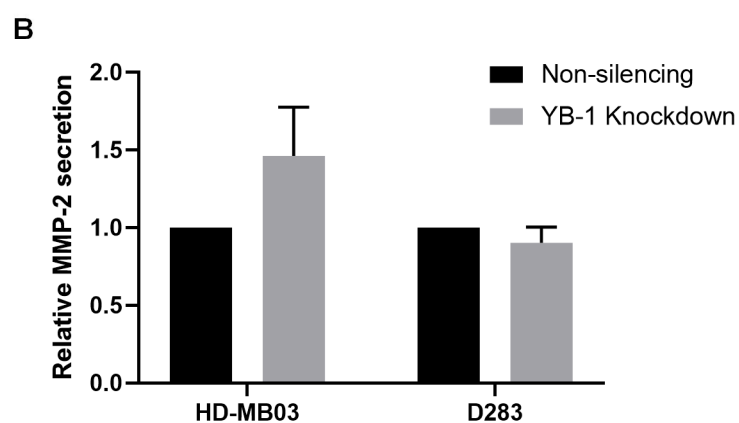

**Supplementary Figure S6. Zymography analysis of MMP-2 and MMP-9 activity in HD-MB03 and D283 cell lines following YB-1 knockdown.** A) Gelatin zymography of conditioned media collected from HD-MB03 and D283 YB-1-knockdown and non-silencing cell lines was undertaken. Representative blots shown. B) Densitometry analysis revealed no significant difference in MMP-2/-9 secretion as a result of YB-1 knockdown. Error bars represent the mean  $\pm$  SEM of 3 independent experiments. Significance was assessed by Student's T-Test.

**A**

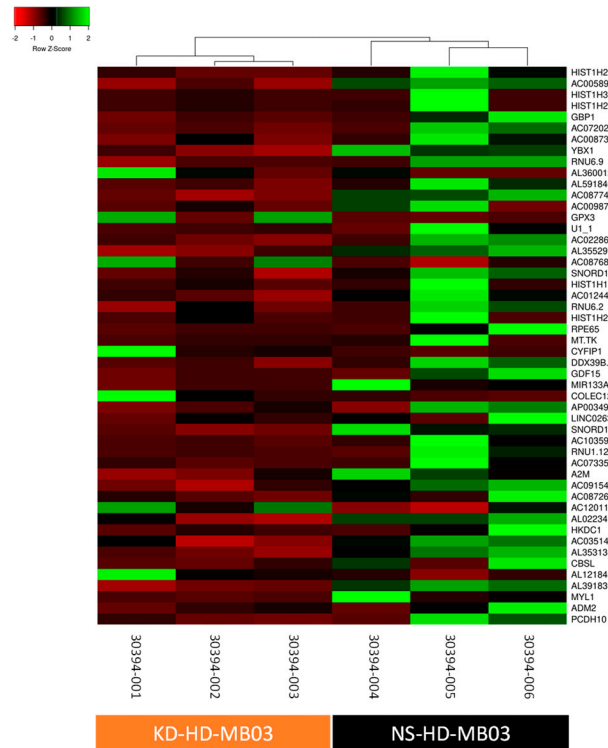

**B**

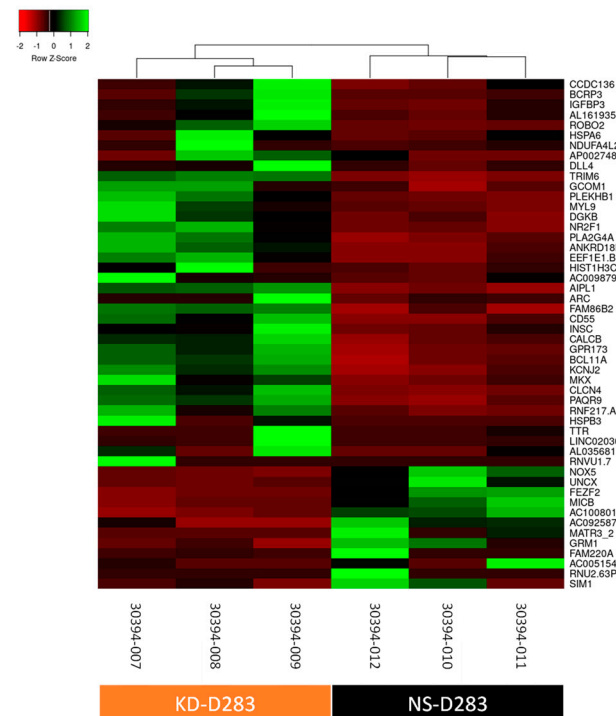

**Supplementary Figure S7. Unsupervised clustering of YB-1-knockdown and non-silencing control HD-MB03 and D283 cell lines.** Unsupervised transformed gene counts were used to create a heatmap representing the top 50 most altered genes across all knockdown and non-silencing samples. The colour scale signifies the relative expression level of a gene across all samples. Expression levels above the mean are shown as green and below the mean are red. Differences in gene expression between KD-HD-MB03 and NS-HD-MB03 (A) and KD-D283 and NS-D283 (B) were visible, with triplicates from each sample set clustering together.

**A**

| Upstream Regulator | Activation z-score | p-value |
|--------------------|--------------------|---------|
| BCR (complex)      | -7.5               | 1.5E-08 |
| LARP1              | 7.3                | 6.4E-19 |
| CKAP2L             | -6.1               | 4.6E-19 |
| ERBB2              | -5.9               | 2.2E-08 |
| RABL6              | -5.6               | 1.3E-10 |
| TP53               | 5.5                | 1.3E-05 |
| FOXO1              | -5.3               | 9.0E-10 |
| MYC                | -5.3               | 4.5E-09 |
| CD3E               | -5.0               | 2.8E-09 |
| DDX5               | -5.0               | 1.4E-07 |

**B**

| Category                                                 | Disease/Function Annotation                    | P-Value  | Activation Z-Score |
|----------------------------------------------------------|------------------------------------------------|----------|--------------------|
| Cellular Development, Cellular Growth and Proliferation  | Cell Proliferation of Tumour Cell Lines        | 8.00E-05 | -9                 |
| Cell Death and Survival                                  | Cell Survival                                  | 1.60E-10 | -8.8               |
| Cell Death and Survival                                  | Cell Viability                                 | 3.50E-11 | -8.5               |
| Infectious Diseases, Organismal Injury and Abnormalities | Viral Infection                                | 5.00E-03 | -8.4               |
| Infectious Diseases, Organismal Injury and Abnormalities | Cell Viability of Tumour Cell Lines            | 4.11E-11 | -7.7               |
| Infectious Diseases, Organismal Injury and Abnormalities | Infection of Cells                             | 1.30E-03 | -7.2               |
| Infectious Diseases, Organismal Injury and Abnormalities | Infection by Retroviridae                      | 1.10E-03 | -6.9               |
| Infectious Diseases, Organismal Injury and Abnormalities | HIV Infection                                  | 9.30E-04 | -6.9               |
| Infectious Diseases, Organismal Injury and Abnormalities | Infection by HIV-1                             | 3.90E-04 | -6.8               |
| Cell Death and Survival                                  | Cell Viability of Colorectal Cancer Cell Lines | 4.30E-09 | -6.2               |
| Cellular Response to Therapeutics                        | Sensitivity of Tumour Cell Lines               | 6.20E-08 | 5.9                |

**Supplementary Figure S8. Ingenuity Pathway Analysis (IPA) of human medulloblastoma patients with high/low YB-1 gene expression.** Pathway analysis of significantly differentially expressed genes identified from a patient medulloblastoma cohort (n = 612) separated by high/low YB-1 expression was conducted using IPA software (Qiagen). A) Upstream regulator analysis was ranked by activation z-score. The top 10 most significantly dysregulated upstream regulators are shown. B) Molecular and Cellular functions were ranked by activation z-score and the top most dysregulated, significant functions presented. The patient dataset[1] was accessed by way of R2: Genomics and Visualisation Platform (<http://r2.amc.nl>) and the cut-off between high YB-1 expression and low YB-1 expression groups was selected by which p-values obtained from the log-rank test were minimized.



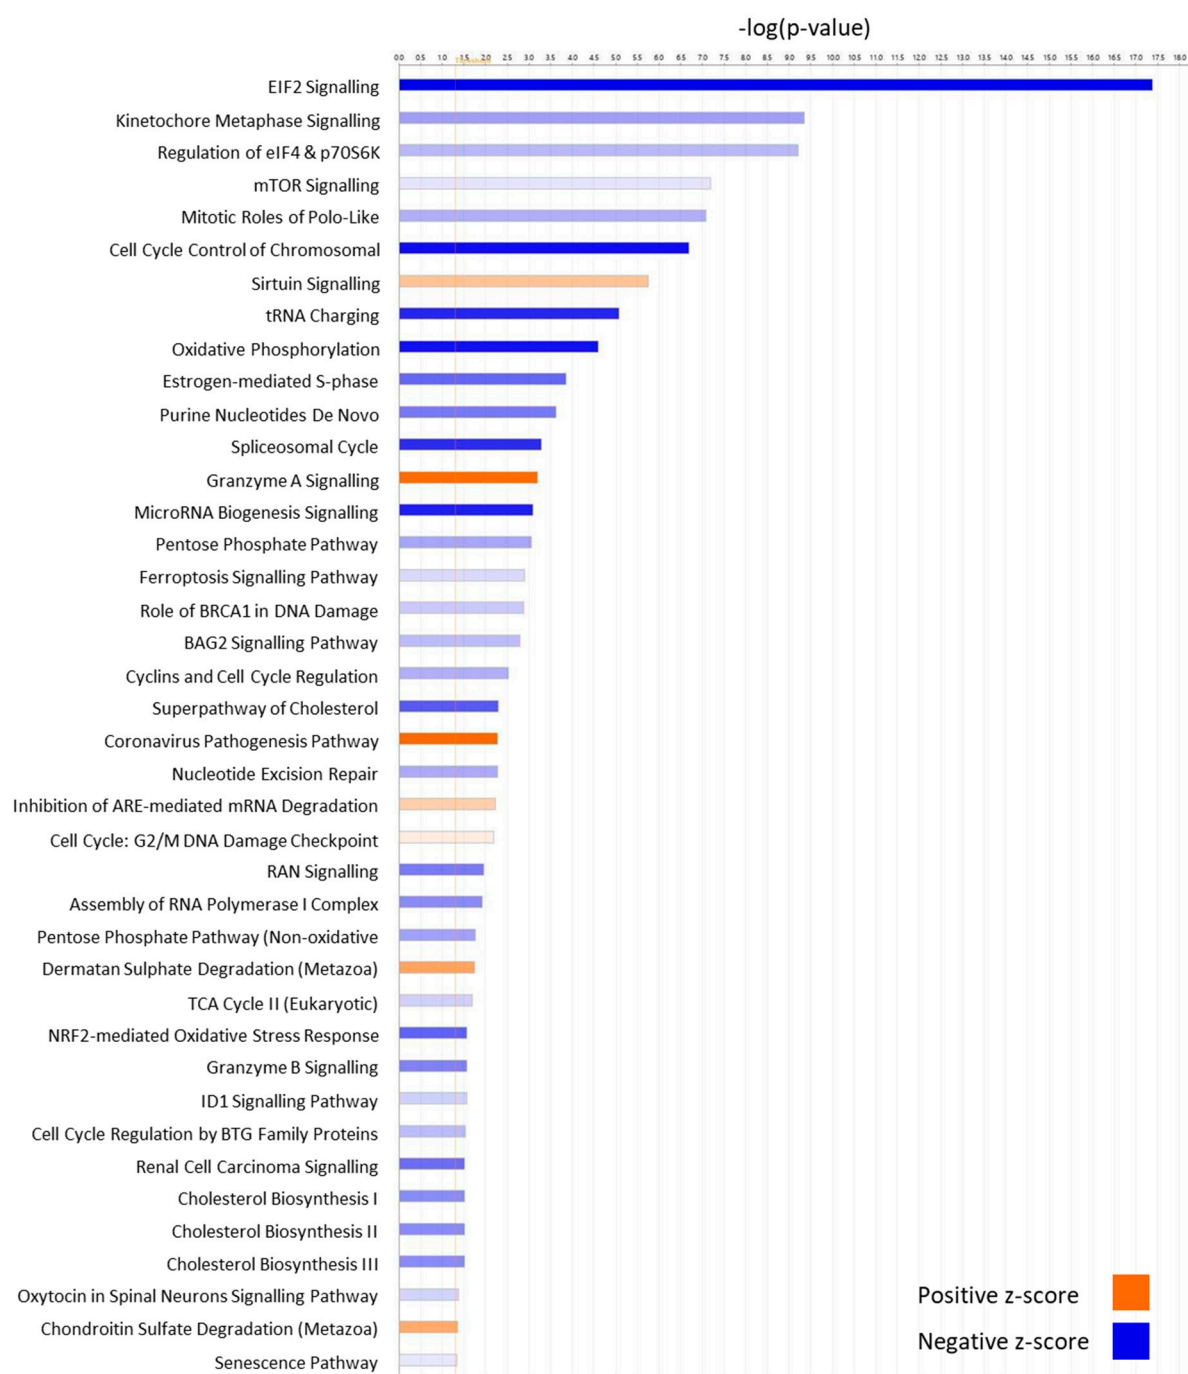

**Supplementary Figure S9. Ingenuity Pathway Analysis (IPA) of a human medulloblastoma cohort.** Pathway analysis of significantly differentially expressed genes identified from a patient medulloblastoma cohort (n = 612) separated by high/low YB-1 expression was conducted using IPA software (Qiagen). The results of canonical pathway analysis are presented. Only pathways from which a z-score could be calculated are shown. The patient dataset[1] was accessed by way of R2: Genomics and Visualisation Platform (<http://r2.amc.nl>) and the cut-off between high YB-1 expression and low YB-1 expression groups was selected by which p-values obtained from the log-rank test were minimized.

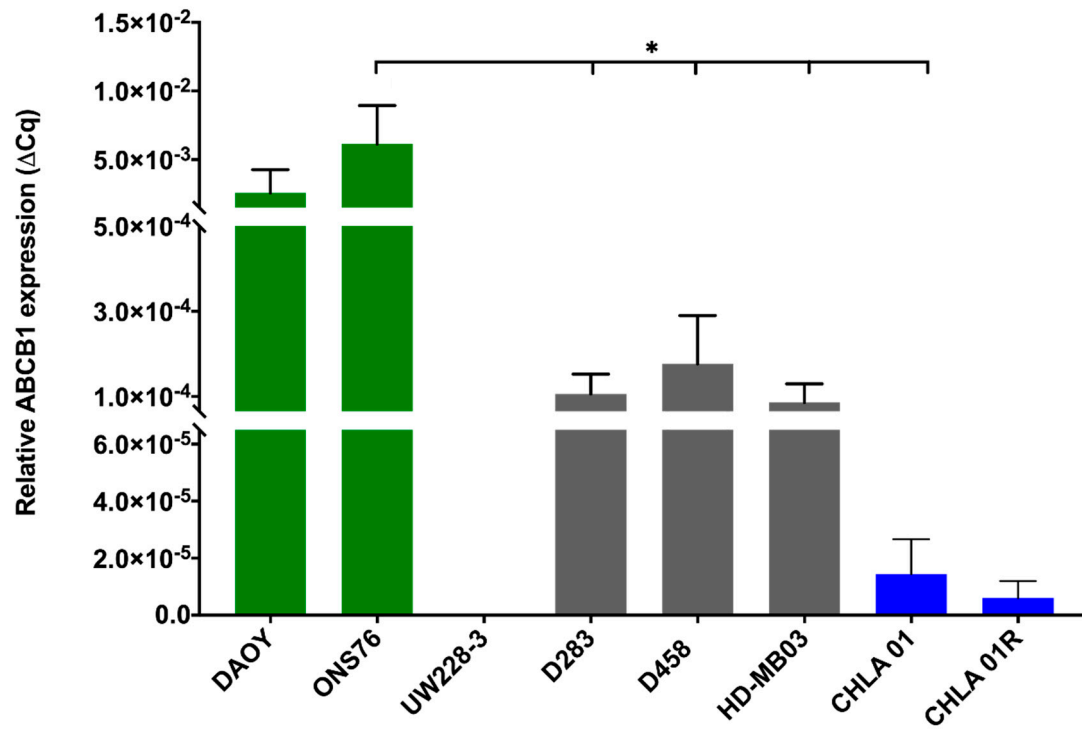

**Supplementary Figure S10. *ABCB1* expression is highest in SHH cell lines.** Analysis of *ABCB1* expression by qRT-PCR demonstrated that *ABCB1* was expressed across all available medulloblastoma cell lines apart from UW-228-3, with expression highest in SHH (green) and Group 3 (grey) sub-groups and lowest in Group 4 (blue) subgroups. Relative *ABCB1* expression ( $2^{-\Delta Cq}$ ) was calculated with respect to housekeeping gene *GAPDH*. n = 3; Mean  $\pm$  SEM; \*P < 0.05. Significance was calculated by ordinary one-way ANOVA analysis with Tukey's multiple comparisons test.

**A**

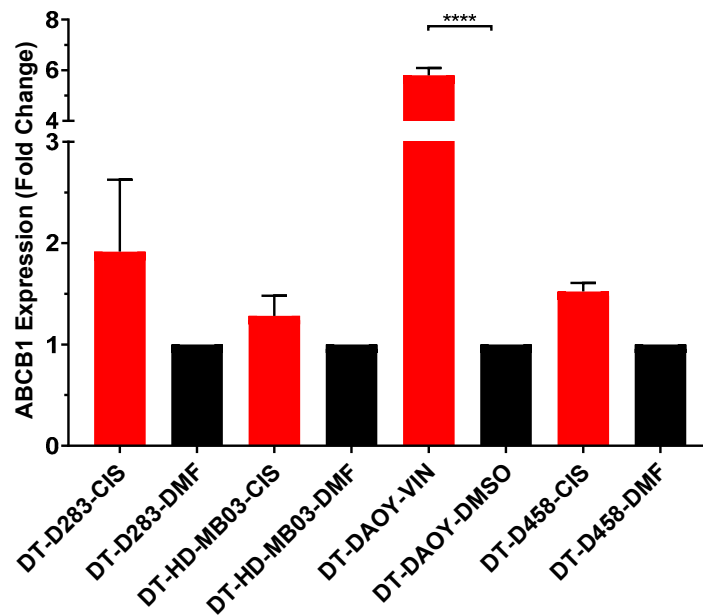

**B**

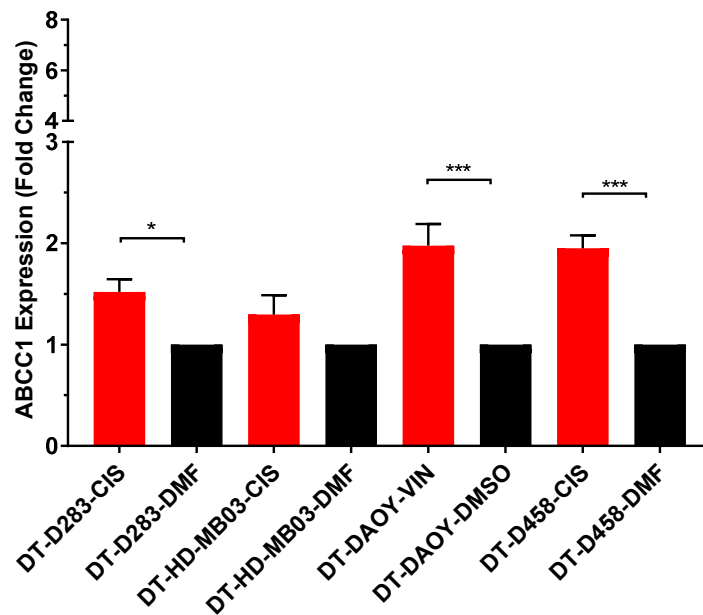

**Supplementary Figure S11. ABC transporter expression is altered in drug-tolerant cell lines.** A) Assessment of *ABCB1* expression across drug-tolerant cell lines revealed elevated expression in DT-DAOY-VIN cells compared to the DT-DAOY-DMSO line. B) Expression of *ABCC1* was found to be significantly increased in DT-DAOY-VIN, DT-D458-CIS and DT-D283-CIS lines relative to appropriate vehicle treated controls. Fold change in ABC transporter gene expression was calculated relative to the *GAPDH* housekeeping gene and vehicle-treated control cell line ( $2^{-\Delta\Delta Cq}$ ). N = 3. Mean  $\pm$  SEM. Significance was assessed using ordinary one-way ANOVA analyses with Sidak's multiple comparisons test

**A**

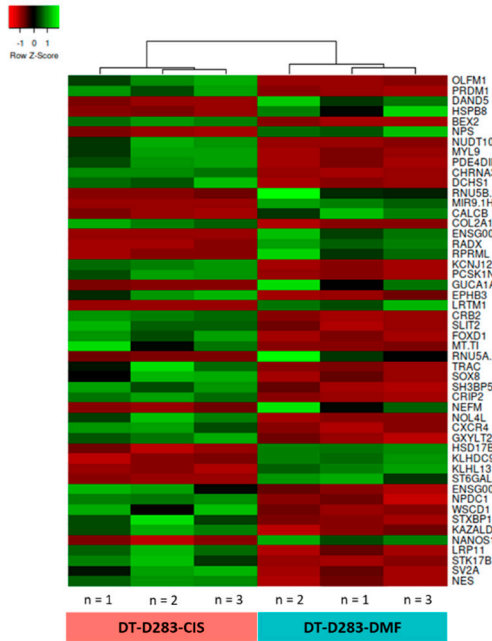

**B**

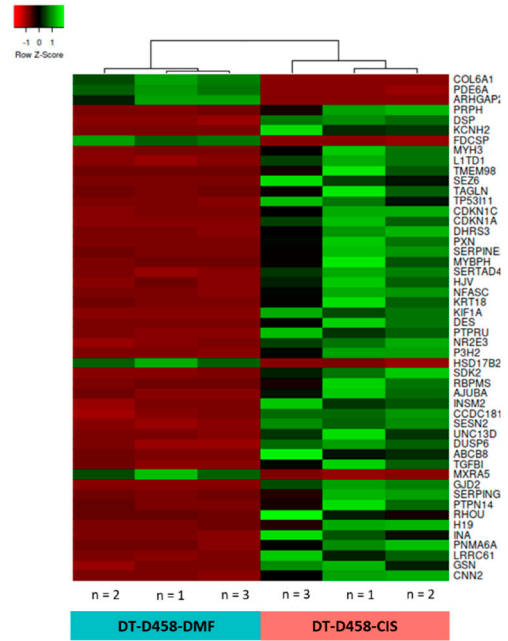

**C**

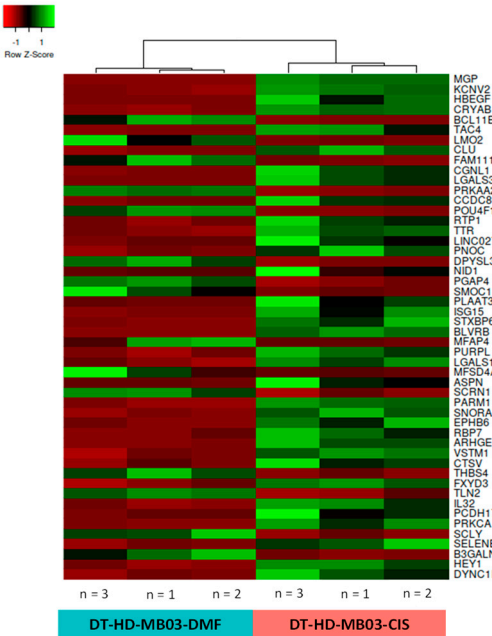

**D**

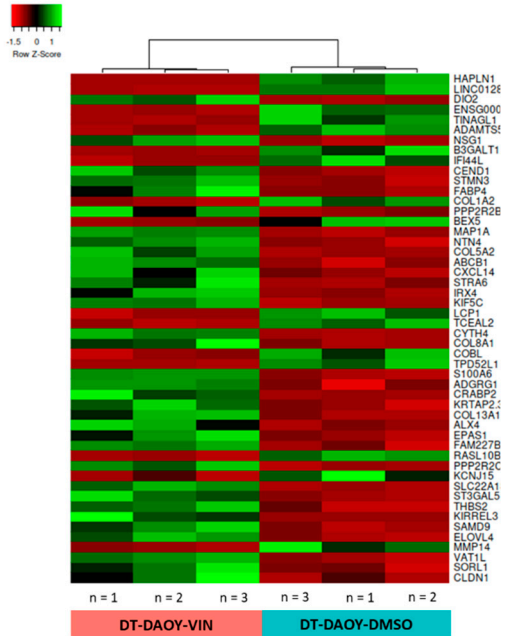

**Supplementary Figure S12. Unsupervised clustering of drug-tolerant and sister vehicle-treated control cell lines.** Unsupervised transformed gene counts were used to create heatmaps representing the top 50 genes with the largest variance across all D283 (A), D458 (B), HD-MB03 (C) and DAOY (D) drug-tolerant and vehicle-treated control samples. The colour scale signifies the relative expression level of a gene across all samples. Expression levels above the mean are shown as green and below the mean are red. Differences in gene expression between drug-tolerant and vehicle-treated cell lines were clear, with triplicates from each sample set clustering together.

| Comparison                               | Fold-Resistance of DT cell line | Significantly up-regulated genes | Significantly down-regulated genes | Total Significantly DEGs |
|------------------------------------------|---------------------------------|----------------------------------|------------------------------------|--------------------------|
| DT-D283-CIS<br>v. DT-D283-DMF            | 2.5                             | 694                              | 600                                | 1294                     |
| DT-D458-CIS<br>v. DT-D458-DMF            | 18.5                            | 1238                             | 910                                | 2148                     |
| DT-HD-MB03-<br>CIS v. DT-HD-<br>MB03-DMF | 1.6                             | 515                              | 395                                | 910                      |
| DT-DAOY-VIN<br>v. DT-DAOY-<br>DMSO       | 4                               | 606                              | 662                                | 1268                     |

**Supplementary Figure S13. Differential gene expression profiles of drug-tolerant cell lines.**

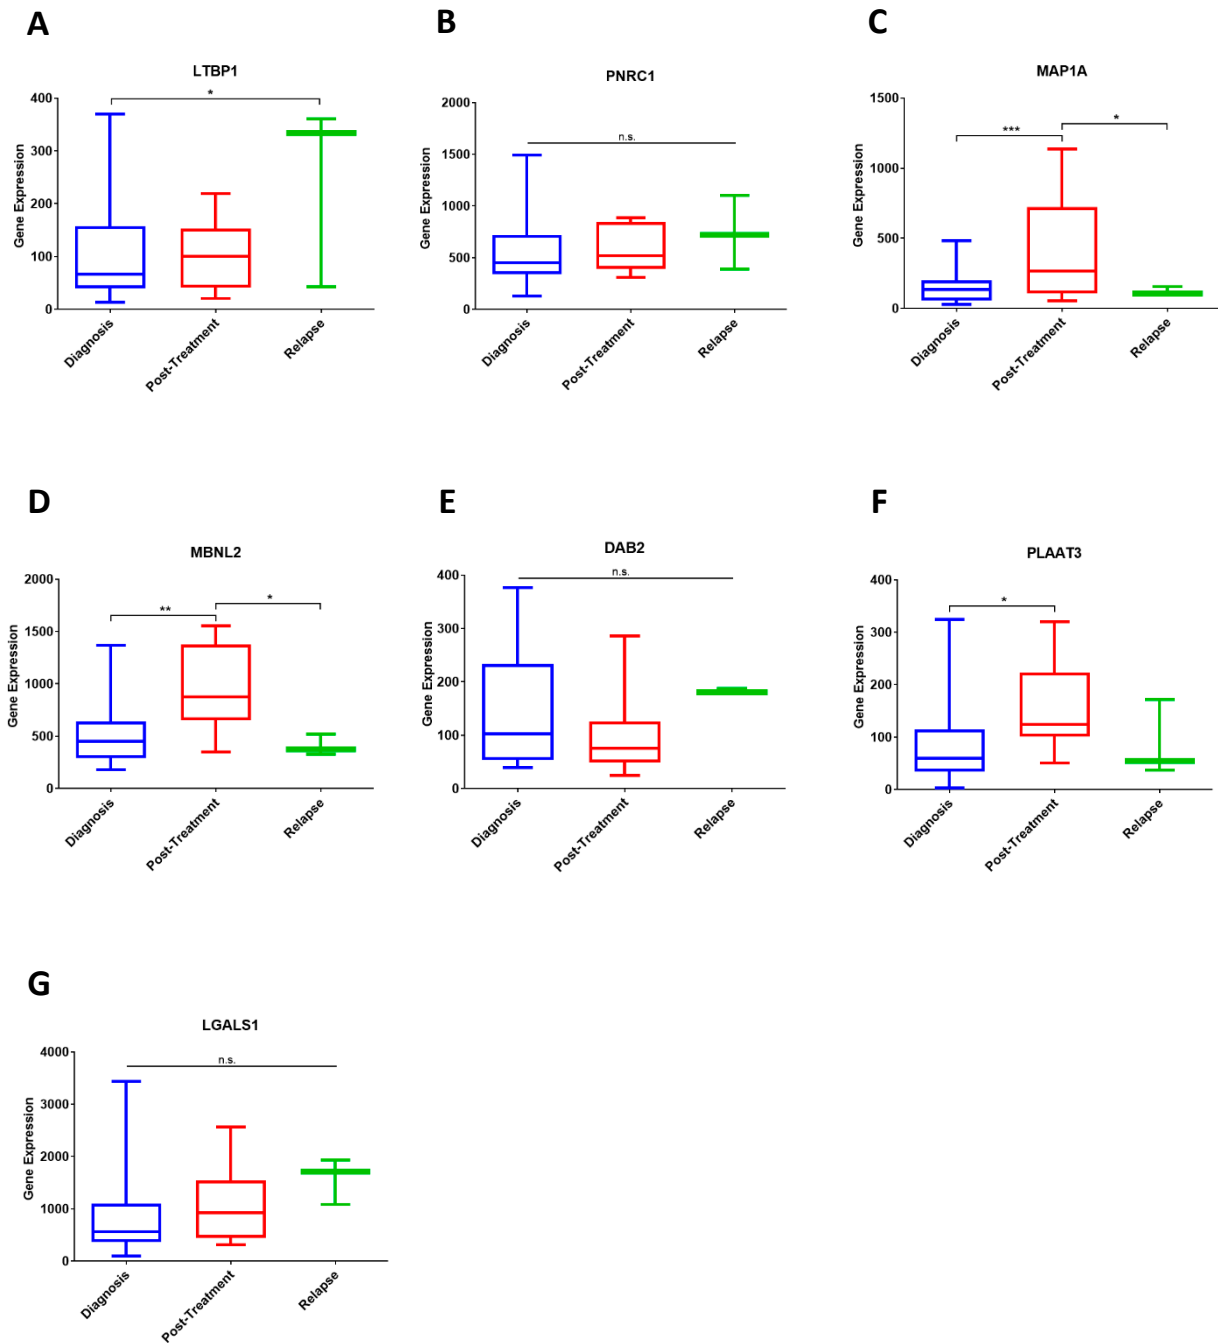

**Supplementary Figure S14. Seven-gene drug tolerant signature expression in medulloblastoma diagnostic, post-treatment and relapse dataset.** Gene expression of *LTBP1*, *PNRC1*, *MAP1A*, *MBNL2*, *DAB2*, *PLAAT3* and *LGALS1* was investigated in a small-scale medulloblastoma dataset containing diagnostic, post-treatment and relapse patient samples. Diagnosis n = 46; post-treatment n = 8, relapse n = 3. Expression displayed as box plots showing the sample minimum (lower line) and the sample maximum (upper line). Dataset (Tumor Medulloblastoma public - Delattre - 57 - MAS5.0 - u133p2) accessed using R2: Genomics Analysis and Visualization Platform[3]. \*P < 0.05, \*\*P < 0.01, \*\*\*P < 0.001, n.s. = not significant.

## References

- 1 Cavalli FMG, Remke M, Rampasek L, Peacock J, Shih DJH, Luu Bet al (2017) Intertumoral Heterogeneity within Medulloblastoma Subgroups. *Cancer Cell* 31: 737-754.e736 Doi <https://doi.org/10.1016/j.ccell.2017.05.005>
- 2 Wang X, Dubuc AM, Ramaswamy V, Mack S, Gendoo DM, Remke Met al (2015) Medulloblastoma subgroups remain stable across primary and metastatic compartments. *Acta Neuropathol* 129: 449-457 Doi 10.1007/s00401-015-1389-0
- 3 Weishaupt H, Johansson P, Sundström A, Lubovac-Pilav Z, Olsson B, Nelander Set al (2019) Batch-normalization of cerebellar and medulloblastoma gene expression datasets utilizing empirically defined negative control genes. *Bioinformatics* 35: 3357-3364 Doi 10.1093/bioinformatics/btz066
