# Supplementary material for: Drug Resistance in Medulloblastoma Is Driven by YB-1, ABCB1 and a Seven-Gene Drug Signature
Source: Cancers (Basel). 2023 Feb 8;15(4):1086. doi: 10.3390/cancers15041086 (PMC9954169; doi:10.3390/cancers15041086)
Supplement: Supplementary file 1 [file cancers-15-01086-s001.zip]

Archive with 4 entries (4 files):
- Supplementary data file S1_WTS_YBX1 knockdown lines_Processed Data_KD-283 v NS-D283.xlsx
- Supplementary data file S2_WTS_YBX1 knockdown lines_Processed Data_KD-HD-MB03 v NS-HD-MB03.xlsx
- Supplementary Methods File SB.pdf
- Supplementary Results File SA.pdf
