# Supplementary material for: Drug Resistance in Medulloblastoma Is Driven by YB-1, ABCB1 and a Seven-Gene Drug Signature
Source: Cancers (Basel). 2023 Feb 8;15(4):1086. doi: 10.3390/cancers15041086 (PMC9954169; doi:10.3390/cancers15041086)
Supplement: Supplementary file 1 [file cancers-15-01086-s001.zip › Supplementary data file S1_WTS_YBX1 knockdown lines_Processed Data_KD-283 v NS-D283.xlsx]

## Sheet: Expression Browser view
Name	Identifier	KD-D283 vs. NS-D283 - Max group means	KD-D283 vs. NS-D283 - Fold change	KD-D283 vs. NS-D283 - Log fold change	KD-D283 vs. NS-D283 - P-value	KD-D283 vs. NS-D283 - FDR p-value	KD-D283 vs. NS-D283 - Bonferroni	KD-D283- N = 1 - TPM	KD-D283- N = 2 - TPM	KD-D283- N = 3 - TPM	NS-D283 - N = 1 - TPM	NS-D283 - N = 2 - TPM	NS-D283 - N = 3 - TPM
RNF217	ENSG00000146373	1.18948	3.64859	1.86734	4.29653e-19	6.90754e-15	1.40845e-14	3.65728	3.66424	3.19532	1.00641	1.06203	0.846038
CD55	ENSG00000196352	0.60027	5.2989	2.40569	1.2546e-15	1.00851e-11	4.11269e-11	1.79398	1.08119	2.33241	0.234431	0.587403	0.189308
BCL11A	ENSG00000119866	0.699516	4.4129	2.14173	1.76375e-14	9.45196e-11	5.78176e-10	1.95481	1.66896	2.47995	0.55423	0.6775	0.190101
CLCN4	ENSG00000073464	0.773648	4.1119	2.03981	3.29401e-13	1.32394e-09	1.07981e-08	2.21721	1.63294	2.88043	0.495452	0.63897	0.539987
NR2F1	ENSG00000175745	0.544371	5.49447	2.45798	3.36111e-12	1.08073e-08	1.10181e-07	1.83042	2.16696	0.892917	0.367087	0.201205	0.317016
AIPL1	ENSG00000129221	0.435575	4.18746	2.06608	1.47623e-11	3.95555e-08	4.83921e-07	1.17422	1.20551	1.43657	0.364109	0.264368	0.296253
YBX1	ENSG00000065978	260.735	-3.42895	-1.77777	2.67831e-11	6.15131e-08	8.77977e-07	230.074	274.061	182.246	894.246	675.767	790.956
NOX5	ENSG00000255346	0.234262	-6.82834	-2.77154	1.48271e-10	2.97969e-07	4.86048e-06	0.13948	0.113755	0.0566048	1.02115	0.722088	0.381836
NUDT11	ENSG00000196368	8.75334	2.46576	1.30203	2.30404e-10	4.11579e-07	7.55288e-06	24.5775	25.9187	26.5115	9.77805	11.8685	10.0471
OLFM1	ENSG00000130558	0.736375	-3.56149	-1.83248	1.75954e-09	2.82881e-06	5.76794e-05	0.948361	0.474194	0.446793	1.72343	2.11529	2.84139
TRIM6	ENSG00000121236	0.170268	9.24812	3.20916	5.05058e-09	7.38165e-06	0.000165563	0.469333	0.532701	0.498434	0.0332762	0.0625338	0.0626994
GPR173	ENSG00000184194	0.403882	4.90694	2.29482	8.14623e-09	1.09139e-05	0.000267042	1.13781	0.882136	1.49521	0.300569	0.309317	0.121358
CALCB	ENSG00000175868	5.23616	5.13831	2.36129	2.24333e-08	2.57615e-05	0.000735387	11.9253	11.3678	21.9601	3.56731	4.67379	0.899366
MYL9	ENSG00000101335	0.741539	8.78164	3.13449	2.13738e-08	2.57615e-05	0.000700656	3.69421	2.03041	0.956214	0.258364	0.0882778	0.398302
NOS2	ENSG00000007171	8.53883	3.6407	1.86421	3.39064e-08	3.63408e-05	0.00111148	29.784	38.246	9.31689	8.86075	6.67749	5.48044
ROBO2	ENSG00000185008	0.200402	6.67637	2.73906	3.98798e-08	3.77146e-05	0.0013073	0.253752	0.579769	0.893862	0.0831195	0.092977	0.0894943
GNG11	ENSG00000127920	0.524342	3.27528	1.71162	3.96515e-08	3.77146e-05	0.00129982	2.14751	1.83605	0.738356	0.524306	0.307905	0.59686
FLT1	ENSG00000102755	2.85237	-2.18051	-1.12467	6.4933e-08	5.7996e-05	0.00212857	3.70162	4.07537	3.94324	7.81572	8.81355	9.26711
FAM111B	ENSG00000189057	2.79477	2.0915	1.06454	1.75294e-07	0.00014091	0.00574631	8.44558	9.7113	6.67183	3.87359	3.99244	4.0834
SHISA9	ENSG00000237515	3.5143	-2.53813	-1.34377	1.69494e-07	0.00014091	0.00555619	3.35049	5.08201	4.00613	9.43302	9.65482	12.7688
PLEKHB1	ENSG00000021300	0.121847	6.92065	2.79091	1.97456e-07	0.000151166	0.00647279	0.502854	0.395957	0.195128	0.0534793	0.0376876	0.0629791
RARB	ENSG00000077092	19.9337	2.1531	1.10642	2.47481e-07	0.000180852	0.00811267	73.2121	59.1164	44.947	26.9558	32.5025	23.5633
RPRML	ENSG00000179673	8.82553	-2.47869	-1.30958	3.81789e-07	0.000266871	0.0125154	8.11251	10.962	12.6423	23.0657	25.1158	31.8598
MUSK	ENSG00000030304	0.393225	-3.26728	-1.70809	5.90152e-07	0.000395328	0.0193458	0.473084	0.512028	0.115942	1.59565	0.648345	1.30013
UNC5B	ENSG00000107731	3.51017	-2.28658	-1.19319	6.45352e-07	0.000415013	0.0211553	5.71103	4.05132	4.02861	11.7233	10.0099	10.0909
EIF2AK3	ENSG00000172071	17.9699	2.30215	1.20298	6.77919e-07	0.000419188	0.0222229	54.4182	43.8426	59.1188	18.644	33.892	17.5646
FAM241A	ENSG00000174749	0.318001	2.38373	1.25322	7.36726e-07	0.000438679	0.0241506	1.23029	0.770014	0.813422	0.395243	0.350356	0.442618
PCDHGB1	ENSG00000254221	0.322732	3.37414	1.75452	1.47454e-06	0.000830421	0.0483369	1.03942	0.78528	1.00834	0.234906	0.272657	0.338469
SLC35F2	ENSG00000110660	0.760945	2.44193	1.28802	1.49793e-06	0.000830421	0.0491036	1.7643	2.2735	2.61816	0.852111	1.10313	0.820619
LIN7A	ENSG00000111052	2.92452	2.78871	1.4796	1.57506e-06	0.000844075	0.051632	9.80683	6.64254	9.20776	2.97009	4.57828	1.87457
PAQR9	ENSG00000188582	0.289463	4.20759	2.073	2.18666e-06	0.00113403	0.0716811	0.841445	0.673545	1.01225	0.142894	0.283449	0.179495
ADAM23	ENSG00000114948	0.453273	2.25664	1.17418	2.44935e-06	0.00123057	0.0802922	1.7286	1.1503	1.13544	0.677498	0.752333	0.367492
VSX2	ENSG00000119614	1.345	3.53	1.81967	3.95065e-06	0.00186808	0.129506	4.70741	3.77826	3.42442	1.22379	1.25256	0.926468
JAM2	ENSG00000154721	0.348907	2.1557	1.10816	3.84875e-06	0.00186808	0.126166	1.09967	1.25164	0.758173	0.499059	0.448084	0.501511
EDIL3	ENSG00000164176	18.9793	1.9906	0.993205	4.97227e-06	0.00225573	0.162996	66.1907	56.4974	45.7387	29.2799	28.4588	27.4888
MKX	ENSG00000150051	0.309291	5.61081	2.48821	5.05108e-06	0.00225573	0.165579	1.42761	0.488446	0.814134	0.144529	0.286693	0.0605163
FEZF2	ENSG00000153266	0.638681	-5.07374	-2.34305	5.45415e-06	0.00231992	0.178793	0.278342	0.426496	0.409292	2.27936	2.41987	1.11553
DGKB	ENSG00000136267	0.227561	5.25821	2.39457	5.48342e-06	0.00231992	0.179752	1.08703	0.572905	0.378986	0.208471	0.058765	0.117841
KCNJ2	ENSG00000123700	0.484601	4.25634	2.08961	5.79437e-06	0.00238862	0.189945	1.56687	1.1075	1.57153	0.295649	0.533371	0.189402
ESRRG	ENSG00000196482	0.19098	2.35207	1.23393	8.26949e-06	0.0032451	0.271082	0.645812	0.425731	0.603553	0.211544	0.295316	0.21638
AC100801.1	ENSG00000253154	0.0891209	-9.71993	-3.28095	8.27574e-06	0.0032451	0.271287	0	0.0222746	0.0534402	0.236542	0.352999	0.222848
FAM220A	ENSG00000178397	0.623784	-12.5034	-3.64424	1.12224e-05	0.00429579	0.367883	0.117795	0.198544	0.127024	0.27561	0.207174	5.11518
EPAS1	ENSG00000116016	13.1389	-2.33275	-1.22203	1.24119e-05	0.00464061	0.406875	21.063	12.0772	17.128	40.5074	56.1147	23.2911
SH3GL2	ENSG00000107295	3.07523	2.85336	1.51266	1.42898e-05	0.0052213	0.468434	9.31589	5.3516	12.0022	2.66948	4.60238	2.3765
NFIA	ENSG00000162599	0.136066	1.92833	0.947348	1.50765e-05	0.00538632	0.494222	0.304652	0.412796	0.472293	0.231308	0.181857	0.214581
PLA2G4A	ENSG00000116711	0.167179	4.18744	2.06607	1.74127e-05	0.00585604	0.570804	0.646209	0.531758	0.316743	0.114542	0.172201	0.0647466
FBN2	ENSG00000138829	3.31398	2.04294	1.03065	1.72269e-05	0.00585604	0.564714	12.4713	11.6101	5.64181	5.93271	3.82103	4.729
SLC44A2	ENSG00000129353	12.3575	-1.86892	-0.902208	1.7484e-05	0.00585604	0.573142	24.2152	23.613	12.2152	38.2508	30.4098	43.1884
TGFBR2	ENSG00000163513	1.31483	2.93748	1.55458	1.82582e-05	0.00599056	0.598522	3.72384	2.75767	4.95021	0.958597	2.0333	1.01934
MAK	ENSG00000111837	0.753118	3.7055	1.88967	2.14947e-05	0.00691141	0.704619	2.46799	1.71139	2.42158	0.202885	1.24646	0.38228
ZNF486	ENSG00000256229	2.98996	2.14772	1.1028	2.58007e-05	0.0081333	0.845773	9.63143	7.61036	9.04624	4.41438	4.96	3.08276
GPNMB	ENSG00000136235	1.63656	-2.73399	-1.45101	2.81514e-05	0.00870367	0.922832	2.73484	1.37221	1.2917	5.91833	4.89407	4.03261
PHACTR2	ENSG00000112419	4.93729	1.84688	0.885091	3.19655e-05	0.00957633	1	18.0573	13.1224	12.5344	8.49097	10.2586	5.25359
APP	ENSG00000142192	3.69899	1.77382	0.826859	3.21653e-05	0.00957633	1	13.7372	9.94631	9.10396	7.04853	6.75048	4.86968
INSC	ENSG00000188487	0.759254	6.56523	2.71485	3.69669e-05	0.0108058	1	1.16529	1.07579	4.18859	0.153603	0.793806	0.0904442
ARHGAP26	ENSG00000145819	0.820702	-2.09032	-1.06373	3.865e-05	0.011096	1	1.1763	1.38146	0.980275	2.99054	1.82756	2.60013
TLCD4	ENSG00000152078	3.38501	-1.98829	-0.991526	4.16955e-05	0.0117603	1	6.4965	4.69648	4.14346	10.2703	10.3215	10.1301
STMN2	ENSG00000104435	7.52982	2.37866	1.25015	4.47742e-05	0.0124109	1	17.9251	20.115	27.5827	8.26511	9.55015	10.3646
ANKRD18B	ENSG00000230453	0.0432473	10.8048	3.4336	5.11835e-05	0.0139471	1	0.17326	0.126186	0.086497	0	0.031742	0
DDIT4	ENSG00000168209	18.1461	3.15393	1.65715	5.44678e-05	0.0145946	1	59.7803	51.557	49.0088	15.1879	25.0418	11.5256
NAV1	ENSG00000134369	0.214718	-1.93206	-0.950142	5.74823e-05	0.0151499	1	0.411785	0.409103	0.189531	0.537544	0.607207	0.802529
EEF1E1-BLOC1S5	ENSG00000265818	4.14694	4.08035	2.02869	6.00248e-05	0.0155648	1	13.6538	16.3596	7.19021	1.97517	5.24494	1.94172
ZNF608	ENSG00000168916	3.02182	2.50762	1.32632	6.19095e-05	0.0157987	1	12.6974	9.17469	5.20373	4.26858	3.19614	3.31232
LINC02030	ENSG00000240708	0.603869	15.0585	3.91251	6.33224e-05	0.0159068	1	0.293247	0.114414	4.54568	0.0285884	0.295484	0.0269333
LOX	ENSG00000113083	24.2557	1.98631	0.990089	6.73655e-05	0.0164949	1	92.6503	73.3188	50.3051	43.4933	36.8787	28.9449
IFIT5	ENSG00000152778	2.12604	1.82961	0.871539	6.77156e-05	0.0164949	1	6.82847	6.02723	5.90986	3.6668	3.99912	2.72969
TFPI2	ENSG00000105825	3.30883	2.19985	1.1374	7.7026e-05	0.0184828	1	10.6572	13.9969	5.12003	4.58759	4.08238	4.77963
TLCD3B	ENSG00000149926	0.853279	2.38264	1.25256	9.05453e-05	0.0210971	1	1.62714	2.03866	3.69663	0.670258	1.44851	1.07347
PEG3	ENSG00000198300	0.848771	-2.67399	-1.41899	8.9663e-05	0.0210971	1	1.1542	1.02674	0.684542	3.20011	2.63895	1.86361
UNCX	ENSG00000164853	0.132817	-7.28952	-2.86582	0.00010057	0.023098	1	0.0539233	0.0252466	0.0726848	0.693914	0.266733	0.237724
ZNF521	ENSG00000198795	0.189959	3.33681	1.73847	0.000120345	0.0272505	1	0.561504	0.568189	0.54527	0.148329	0.258835	0.0998155
TRIM51GP	ENSG00000220948	23.4009	1.85315	0.889979	0.000136672	0.0305178	1	80.9051	59.288	66.1247	38.3138	45.7632	29.0601
PLCB4	ENSG00000101333	0.0623949	3.47758	1.79809	0.000147914	0.0325755	1	0.220605	0.0612066	0.256978	0.0764677	0.0628691	0.0180102
PCDHB15	ENSG00000113248	0.697314	2.37473	1.24776	0.000151666	0.0329504	1	2.12957	1.92764	2.07953	0.863655	0.780295	0.970128
SULF2	ENSG00000196562	9.08545	-1.89257	-0.920344	0.000174592	0.0374256	1	14.2869	13.9808	14.6954	27.1561	27.4899	27.8054
VCAN	ENSG00000038427	0.698997	2.22491	1.15375	0.000193807	0.0409979	1	1.90125	1.5789	2.60244	0.91215	1.39327	0.512219
PRRX1	ENSG00000116132	0.129408	2.09549	1.06729	0.000214974	0.0448849	1	0.512641	0.45443	0.196552	0.199907	0.19535	0.158201
SLC16A4	ENSG00000168679	3.9095	2.56708	1.36013	0.000221017	0.0449784	1	14.0229	8.84294	11.5285	4.06476	5.89547	3.69197
MUC16	ENSG00000181143	5.24219	-1.63125	-0.705974	0.000219299	0.0449784	1	10.4702	8.94178	9.38673	14.3253	17.1718	16.137
APBA1	ENSG00000107282	1.39829	-2.34851	-1.23175	0.000239703	0.0471173	1	1.71884	2.08451	1.55786	4.24056	3.42689	4.9884
SPX	ENSG00000134548	0.567394	2.96469	1.56788	0.000234725	0.0471173	1	1.70485	1.26109	1.98672	0.364283	0.787259	0.557689
GSPT2	ENSG00000189369	1.95314	2.29671	1.19957	0.000240319	0.0471173	1	6.28205	6.10942	4.9191	2.67027	2.75328	2.18174
NDNF	ENSG00000173376	0.99882	2.61104	1.38462	0.000252078	0.0488271	1	3.17149	2.00939	3.53055	0.830647	1.9599	0.643437
TTR	ENSG00000118271	9.66406	9.69273	3.2769	0.000262651	0.0502696	1	1.34174	1.01393	76.4468	0.881214	7.5038	0.596705
TULP1	ENSG00000112041	13.7676	2.26528	1.17969	0.000288885	0.0546401	1	38.3192	35.8636	46.3005	13.4802	30.9855	10.3132
AC090204.1	ENSG00000247134	0.292709	-3.13197	-1.64707	0.000324895	0.0600384	1	0.377734	0.353706	0.113146	0.736498	0.553622	1.35303
THSD4	ENSG00000187720	0.424848	-3.21921	-1.68671	0.000321395	0.0600384	1	0.687045	0.24667	0.255914	1.34514	2.20305	0.345261
AC005154.5	ENSG00000281039	0.770021	-9.31945	-3.22025	0.000337814	0.0617163	1	0.738561	0	0	0	5.50252	1.62799
GULP1	ENSG00000144366	0.361453	2.09915	1.0698	0.000343264	0.0620074	1	1.43072	0.802062	0.960023	0.572598	0.698396	0.274911
GRM1	ENSG00000152822	0.452901	-4.02161	-2.00777	0.000351842	0.062733	1	0.380513	0.527337	0.123097	1.51351	0.627406	1.93753
CUX2	ENSG00000111249	4.53774	-1.77399	-0.826995	0.000355085	0.062733	1	10.1834	7.22207	5.68902	10.3318	17.6164	13.4087
NDUFA4L2	ENSG00000185633	1.21339	6.11646	2.6127	0.000364488	0.0636944	1	0.622837	9.80184	0.704131	0.423079	1.10426	0.265724
DHRS3	ENSG00000162496	0.910646	2.58921	1.37251	0.000381395	0.0645441	1	2.90305	2.2528	2.83934	0.844353	1.65726	0.654054
S1PR1	ENSG00000170989	10.9665	1.77139	0.82488	0.000378842	0.0645441	1	30.8275	39.7118	26.8293	19.4842	21.1316	14.823
FAM86B2	ENSG00000145002	0.181477	10.5043	3.39291	0.000381352	0.0645441	1	0.536529	0.5024	0.55631	0.144846	0	0
INSIG1	ENSG00000186480	6.37294	-1.7172	-0.780055	0.000401193	0.0671873	1	9.28287	13.1904	10.8401	21.593	13.0224	22.9474
RTL9	ENSG00000243978	1.23937	-2.58878	-1.37227	0.000420497	0.0696941	1	1.15221	2.02417	1.14535	4.2943	2.64517	4.25922
COL12A1	ENSG00000111799	1.1284	2.26575	1.17999	0.000438388	0.0715989	1	3.66271	2.56278	3.6607	1.26803	2.01556	1.17969
ITPRIP	ENSG00000148841	0.646484	-2.05028	-1.03582	0.000440896	0.0715989	1	0.950432	0.96233	0.91657	1.7085	1.95358	2.20573
CYP4V2	ENSG00000145476	0.151546	2.23425	1.15979	0.000480744	0.0772892	1	0.392508	0.437805	0.497951	0.222838	0.190348	0.190852
NCR3LG1	ENSG00000188211	1.54999	1.65131	0.723611	0.000501733	0.0798649	1	4.80142	4.03147	4.78433	3.19196	3.3011	1.90389
PLXNA2	ENSG00000076356	0.720934	-1.98679	-0.990438	0.000527493	0.0826831	1	0.920272	1.68534	0.691585	2.39138	1.87547	2.26191
LINC02463	ENSG00000257683	3.32356	-3.06192	-1.61443	0.000529723	0.0826831	1	3.74333	3.82387	2.24255	9.28921	12.3443	8.62641
RORB	ENSG00000198963	0.104639	2.56321	1.35795	0.000537197	0.0830434	1	0.25197	0.263377	0.394928	0.143958	0.141707	0.0774994
COL8A1	ENSG00000144810	0.0748004	-3.93438	-1.97613	0.000548714	0.084016	1	0.0479395	0.0729463	0.0484643	0.217321	0.230547	0.231158
RNF217-AS1	ENSG00000236548	0.0377587	3.95918	1.9852	0.000564133	0.0855619	1	0.148494	0.0564885	0.1251	0.0217148	0.0255046	0.035801
LINC02208	ENSG00000250891	0.643083	2.70066	1.43331	0.000589727	0.0886078	1	1.32476	1.55062	2.68596	0.8427	0.737208	0.538401
IGFBP3	ENSG00000146674	0.365473	4.31115	2.10807	0.000600283	0.0893588	1	0.394675	0.773786	1.93956	0.144287	0.460953	0.149527
AHR	ENSG00000106546	3.3401	1.66344	0.734173	0.000621616	0.0916855	1	12.5484	10.3798	6.86517	6.43887	7.24316	4.34506
RAB38	ENSG00000123892	3.07351	2.27571	1.18632	0.000675112	0.0986708	1	8.30692	11.207	7.74778	4.97414	4.11121	2.99394
PPT2-EGFL8	ENSG00000258388	0.615065	2.35032	1.23286	0.000686933	0.0990078	1	2.03538	1.26422	2.07719	0.705959	0.46096	1.14982
RFK	ENSG00000135002	22.9115	-1.5228	-0.606731	0.000689736	0.0990078	1	45.7369	43.046	45.8545	72.6374	70.7508	64.5769
PCDHB11	ENSG00000197479	1.03494	2.08138	1.05754	0.000699261	0.0994869	1	3.19063	3.77257	2.25971	1.58162	1.05514	1.80296
SLITRK3	ENSG00000121871	0.142953	3.22568	1.68961	0.000735573	0.100086	1	0.374135	0.670644	0.240147	0.112548	0.152754	0.129595
PTER	ENSG00000165983	7.46261	-1.61118	-0.688115	0.000723409	0.100086	1	13.7456	16.1682	11.8206	21.1057	20.9924	25.565
ZC3H12C	ENSG00000149289	0.58372	1.86109	0.896147	0.000729812	0.100086	1	1.85052	1.52029	1.76227	0.78289	1.28573	0.737566
STON2	ENSG00000140022	0.09852	-2.38735	-1.25541	0.000739739	0.100086	1	0.0866003	0.14191	0.136186	0.303933	0.245917	0.342014
GCOM1	ENSG00000137878	0.188668	4.66566	2.22208	0.000716353	0.100086	1	0.716886	0.717404	0.265551	0	0.162417	0.199035
WWC3	ENSG00000047644	4.19864	1.75339	0.810147	0.000740824	0.100086	1	10.8252	10.1366	15.5886	4.83942	9.59967	6.98736
ARC	ENSG00000198576	0.195526	4.99337	2.32001	0.000747257	0.100114	1	0.207198	0.211657	1.21872	0.176287	0.124232	0.0415203
BMP2	ENSG00000125845	3.74884	2.13367	1.09334	0.00076903	0.102179	1	14.949	11.541	7.03113	5.54418	6.73028	3.52304
AC091182.1	ENSG00000253123	5.23721	1.92393	0.944059	0.000791717	0.104331	1	18.3407	12.3208	15.4228	7.53792	9.07682	7.7247
AL163952.1	ENSG00000259868	1.03144	-2.62408	-1.39181	0.000812312	0.105833	1	1.86671	1.07649	0.623933	3.76838	3.35317	2.24555
KLHL13	ENSG00000003096	2.07092	2.03063	1.02193	0.000816275	0.105833	1	8.63858	7.25749	2.77139	3.81572	2.31626	2.98085
MPPED2	ENSG00000066382	2.28784	2.31622	1.21177	0.000855211	0.109994	1	7.93691	5.63521	6.5822	2.47013	4.56636	1.85716
GPR61	ENSG00000156097	0.150808	-3.534	-1.8213	0.000898739	0.114675	1	0.0557414	0.0730739	0.240433	0.352134	0.772034	0.258026
ARX	ENSG00000004848	0.480524	3.51064	1.81173	0.000928761	0.117572	1	1.6656	1.40707	1.18763	0.254156	0.815932	0.159628
PCDHB9	ENSG00000177839	0.135686	3.08121	1.6235	0.000979311	0.123003	1	0.344773	0.370671	0.470467	0.224077	0.0561459	0.112589
RAB33B	ENSG00000172007	11.6651	1.63741	0.711413	0.00100677	0.123555	1	40.2914	30.8076	31.8971	18.7059	26.1477	18.9938
GRIP1	ENSG00000155974	1.72917	1.81044	0.856339	0.000999727	0.123555	1	4.76243	4.8291	5.57506	2.74053	3.19759	2.59133
ALDOC	ENSG00000109107	0.507665	2.92195	1.54693	0.000998989	0.123555	1	1.87779	2.00087	0.698242	0.505003	0.427059	0.618497
DACT1	ENSG00000165617	0.0842007	3.11004	1.63693	0.00102799	0.125204	1	0.175785	0.305692	0.259512	0.0440668	0.110416	0.0830314
ST6GAL2	ENSG00000144057	0.676683	-2.78634	-1.47837	0.0010358	0.125208	1	0.724093	1.01363	0.466652	2.19902	1.21401	2.69242
SLC44A5	ENSG00000137968	0.242883	3.10373	1.634	0.00106075	0.127267	1	0.465406	0.695607	0.949045	0.251291	0.226279	0.217014
AC004540.1	ENSG00000214870	1.70868	-1.79692	-0.845525	0.00115259	0.137261	1	2.3763	2.36376	3.69668	3.23569	6.02924	6.28564
AC010735.2	ENSG00000272622	0.203057	3.16236	1.661	0.00121852	0.144045	1	0.573552	0.521273	0.682154	0.157878	0.203974	0.204514
INSM2	ENSG00000168348	5.42366	2.49821	1.32089	0.00124253	0.145349	1	27.3206	15.0465	6.5539	9.12534	5.16604	5.13673
ZNF737	ENSG00000237440	6.00848	1.57825	0.658326	0.00124763	0.145349	1	18.8634	20.7211	13.8531	10.7547	10.3814	12.845
LGR5	ENSG00000139292	0.824013	-2.28744	-1.19373	0.00129516	0.1498	1	1.10098	1.2432	0.892368	2.72754	2.01705	2.71239
PLPPR1	ENSG00000148123	23.9996	-1.9292	-0.948003	0.0013098	0.150411	1	44.4406	52.5304	16.7761	75.0398	55.0288	86.9824
CAVIN1	ENSG00000177469	4.28711	-2.53777	-1.34356	0.00134724	0.153614	1	7.54849	6.04801	1.859	15.4445	8.54054	14.7245
SYCP2	ENSG00000196074	0.182936	2.35615	1.23643	0.00138018	0.156261	1	0.56682	0.636918	0.423157	0.234637	0.354668	0.105721
SIM1	ENSG00000112246	0.176398	-4.30097	-2.10466	0.00144915	0.160711	1	0.133738	0.227693	0.0163882	0.576043	0.0601401	0.94469
AC068672.2	ENSG00000253377	142.584	1.6248	0.700259	0.00145946	0.160711	1	584.306	347.799	333.408	207.888	324.684	255.198
MNS1	ENSG00000138587	0.434265	2.5243	1.33589	0.0014552	0.160711	1	2.04313	1.28245	0.585097	0.446518	0.468916	0.618629
ZNF506	ENSG00000081665	2.63636	1.57932	0.659305	0.00145616	0.160711	1	7.24144	7.78271	8.14873	4.3222	5.82867	4.7691
MBOAT2	ENSG00000143797	10.2239	1.76139	0.816715	0.00148228	0.162113	1	19.739	25.2902	43.3191	13.8977	25.1976	12.8787
MATR3_2	ENSG00000015479	0.125431	-283.928	-8.14938	0.0014941	0.162302	1	0	0	0	0.0632585	0.273419	0.798591
TPD52L1	ENSG00000111907	0.28389	2.5219	1.33451	0.00154729	0.166951	1	1.09859	0.465698	0.920508	0.312616	0.481407	0.212708
PDK4	ENSG00000004799	0.24756	2.74998	1.45942	0.00157197	0.168484	1	0.818854	0.941031	0.457111	0.116115	0.259122	0.423897
AC109460.3	ENSG00000261067	0.184125	2.97061	1.57076	0.00159427	0.169742	1	0.660001	0.348881	0.602655	0.199255	0.222328	0.129057
NSMCE2	ENSG00000156831	49.9215	1.54959	0.631886	0.00161993	0.171339	1	166.624	146.247	129.033	81.6975	126.905	80.6448
CDK6	ENSG00000105810	32.2102	-1.50583	-0.59056	0.00165324	0.173719	1	70.3699	65.2521	56.7109	87.1381	108.095	97.5613
OR2W3	ENSG00000238243	10.9419	-2.04479	-1.03195	0.00170936	0.178451	1	16.406	19.0493	12.8128	33.2907	26.8869	38.8591
BEX2	ENSG00000133134	1.35121	3.50938	1.81122	0.00172612	0.179038	1	4.07486	2.78318	4.91105	1.23382	1.89707	0.317016
KLHDC8A	ENSG00000162873	5.09288	-2.2738	-1.1851	0.00175563	0.179396	1	5.34275	11.2637	3.84365	12.6993	10.1842	23.1284
SCN5A	ENSG00000183873	1.16404	1.74106	0.799966	0.00176306	0.179396	1	4.43495	4.0738	1.93704	2.1596	1.58995	2.22066
ATP11A	ENSG00000068650	0.0845619	1.85476	0.891229	0.00176293	0.179396	1	0.192945	0.192204	0.346768	0.129669	0.180502	0.0950148
ABHD17C	ENSG00000136379	3.93562	-1.57687	-0.657065	0.0018514	0.185663	1	6.58768	7.77277	7.96306	9.92944	13.5925	12.2725
SPECC1	ENSG00000128487	4.11525	-1.52287	-0.606794	0.00185929	0.185663	1	8.18692	7.75108	8.24598	12.2782	12.8827	12.2035
FAM156B	ENSG00000179304	0.28449	-2.78802	-1.47924	0.00184635	0.185663	1	0.26569	0.426496	0.227385	0.710449	0.41722	1.43625
ITGB8	ENSG00000105855	0.46266	2.36787	1.24359	0.00189211	0.187774	1	0.862986	1.10068	2.02565	0.661448	0.535643	0.537061
TMTC2	ENSG00000179104	4.54553	1.53943	0.622395	0.00198361	0.195647	1	14.6446	13.2627	12.2651	8.93061	10.2602	7.24151
NEFM	ENSG00000104722	35.4006	-1.85536	-0.891698	0.00211877	0.207704	1	62.3945	78.9609	32.4455	112.874	77.0589	130.048
STON1	ENSG00000243244	1.91495	1.62753	0.702683	0.00213626	0.20815	1	6.36973	5.66324	4.92221	2.82327	4.63034	3.10313
GNAQ	ENSG00000156052	0.512907	1.67501	0.744172	0.00217218	0.210374	1	1.94068	1.77938	0.879234	1.02165	0.755527	0.962506
TBX2-AS1	ENSG00000267280	1.00641	3.02399	1.59645	0.00226979	0.21802	1	1.30891	2.58263	4.74687	1.20313	1.13048	0.61826
COL9A3	ENSG00000092758	0.748579	-2.49773	-1.32062	0.00227824	0.21802	1	1.31596	0.806964	0.586043	2.72478	2.47065	1.6044
NETO1	ENSG00000166342	0.773635	3.57207	1.83676	0.00235047	0.223601	1	1.26675	1.00825	4.27442	0.570544	1.16966	0.20244
DCHS1	ENSG00000166341	1.07278	2.29041	1.19561	0.00240358	0.226543	1	2.7628	2.10414	4.41212	1.04659	1.961	1.1832
GREM1	ENSG00000166923	0.105315	-2.93721	-1.55444	0.00240958	0.226543	1	0.0838941	0.08927	0.143924	0.249823	0.486244	0.226955
GALNT7	ENSG00000109586	0.595243	1.78181	0.833346	0.00243671	0.227314	1	2.05398	1.8768	1.36198	0.988283	1.22904	0.775891
RUNX1T1	ENSG00000079102	0.445438	1.7022	0.7674	0.00247024	0.227314	1	1.2954	1.68493	0.988148	0.88685	0.457857	0.98241
SOX9	ENSG00000125398	4.68298	-1.94873	-0.962537	0.00246083	0.227314	1	6.79792	7.90987	6.84334	15.3013	17.8614	9.48387
AC011297.1	ENSG00000273906	24.3579	1.58507	0.664545	0.00247434	0.227314	1	91.8061	63.2237	60.7456	45.761	54.3054	37.6934
KIF26B	ENSG00000162849	0.155836	2.42549	1.27828	0.00254349	0.232339	1	0.442279	0.33718	0.576816	0.0915765	0.309769	0.17255
SPARCL1	ENSG00000152583	0.615356	-3.0639	-1.61537	0.00258878	0.233819	1	0.551283	0.956518	0.320549	1.70716	0.944626	2.89499
DTX3	ENSG00000178498	3.87499	1.59725	0.675586	0.00257883	0.233819	1	12.9665	10.8242	10.4496	6.45494	9.67397	5.64036
EGFLAM	ENSG00000164318	2.62287	1.93096	0.949319	0.00262527	0.23579	1	9.56482	10.9458	3.19552	6.03746	2.2852	3.77856
SLC34A2	ENSG00000157765	1.91264	-2.12712	-1.0889	0.00268832	0.240112	1	3.93353	2.89852	1.35565	5.43837	4.92574	6.95864
PDK1	ENSG00000152256	3.63083	1.57128	0.65194	0.00272153	0.240407	1	9.79198	12.5424	9.78301	6.6915	8.73582	5.28961
PTPRB	ENSG00000127329	0.832621	2.14339	1.0999	0.00270806	0.240407	1	2.33773	2.59198	2.41078	0.91161	1.91768	0.670831
NR2F2-AS1	ENSG00000247809	0.0922104	3.08927	1.62727	0.00274111	0.240814	1	0.144928	0.140735	0.496821	0.0879127	0.147508	0.0295797
RNU5F-1	ENSG00000199377	14.5075	-3.30543	-1.72484	0.00283139	0.247393	1	3.85483	10.8289	23.3821	82.8645	22.7757	24.9603
AFAP1	ENSG00000196526	0.580709	-1.88121	-0.911661	0.00288444	0.250665	1	0.943733	1.32029	0.54518	1.68892	1.0312	2.51983
FMN2	ENSG00000155816	1.85189	-1.69059	-0.757528	0.00292016	0.252405	1	3.76001	3.89145	2.27521	5.45412	3.72363	7.55039
RS1	ENSG00000102104	1.6037	2.36519	1.24195	0.00299224	0.257253	1	5.80754	5.15031	3.3435	2.49809	1.44036	2.10386
AMPD3	ENSG00000133805	0.0376652	2.9822	1.57638	0.00308822	0.264092	1	0.141087	0.163198	0.0372894	0.0291271	0.0364911	0.0457347
TRIM58	ENSG00000162722	97.095	-1.61049	-0.687502	0.00320308	0.272465	1	171.104	236.057	138.373	309.458	206.89	361.093
DANCR	ENSG00000226950	3.4596	1.53755	0.620632	0.00330424	0.279591	1	12.1811	8.29957	9.98863	6.40269	7.13412	6.53914
GPR63	ENSG00000112218	1.22821	1.77857	0.830715	0.00352144	0.29641	1	3.38242	2.79569	4.51681	1.91217	3.08453	1.19751
AL353740.1	ENSG00000203434	16.8789	1.94603	0.960531	0.0035676	0.298731	1	59.0241	54.1678	37.0929	21.1051	29.9616	26.583
AC242842.3	ENSG00000286185	0.0681545	-3.04357	-1.60576	0.00363337	0.302585	1	0.0273579	0.128088	0.0456566	0.237752	0.158955	0.219681
RXRG	ENSG00000143171	0.269939	2.68364	1.42419	0.00365191	0.302585	1	0.649454	1.64787	0.169436	0.294106	0.161203	0.43871
GPR155	ENSG00000163328	4.21917	1.83667	0.877095	0.00372655	0.302585	1	11.5453	8.41906	16.6219	6.51129	9.09344	4.95066
GUCY1A2	ENSG00000152402	11.6289	1.45985	0.545824	0.0037264	0.302585	1	34.0239	39.197	29.819	22.663	23.1695	25.2817
CSNK1G1	ENSG00000169118	13.4435	-1.53396	-0.617259	0.00367883	0.302585	1	25.7148	25.4348	27.2427	37.0636	44.555	40.5577
XKR7	ENSG00000260903	0.154484	2.7908	1.48068	0.00372063	0.302585	1	0.556808	0.288136	0.506942	0.162848	0.217442	0.113046
ANKRD37	ENSG00000186352	1.0711	2.24153	1.16448	0.00375624	0.303463	1	2.30212	2.20254	4.72209	1.08312	1.87041	1.29621
NPR3	ENSG00000113389	49.6571	1.497	0.582072	0.00380506	0.30587	1	145.894	177.163	118.203	101.062	95.512	99.6628
SHE	ENSG00000169291	0.372885	2.33724	1.22481	0.00384591	0.307616	1	0.838557	0.918099	1.4781	0.498046	0.538878	0.383901
PTPRR	ENSG00000153233	0.186242	-3.01931	-1.59422	0.00393493	0.313177	1	0.123118	0.115286	0.301735	0.37972	0.725886	0.592116
KCNF1	ENSG00000162975	7.64592	-1.72032	-0.782677	0.00399282	0.31622	1	14.4878	15.1324	10.5213	20.1716	18.7643	30.2814
ZFHX3	ENSG00000140836	3.40966	-1.42967	-0.515684	0.00402381	0.317112	1	7.50783	7.70352	6.25247	9.35276	10.9344	10.6853
AC002454.1	ENSG00000237819	1.6374	-2.55263	-1.35198	0.00411249	0.322087	1	2.1976	1.82037	1.74694	4.44963	7.24698	3.26046
GAS1	ENSG00000180447	0.244676	2.78214	1.47619	0.00412701	0.322087	1	0.806664	0.41964	0.902077	0.209709	0.492615	0.0790272
EPHA1-AS1	ENSG00000229153	0.648415	-2.43055	-1.28128	0.00415368	0.322602	1	0.795384	0.953331	0.657568	1.52601	1.30563	3.02728
CCDC81	ENSG00000149201	1.50807	-2.15413	-1.10711	0.00422393	0.326481	1	2.41934	1.46383	2.35245	3.81728	6.16437	3.77405
NUDT10	ENSG00000122824	0.359221	2.97572	1.57324	0.00425019	0.32694	1	0.874907	0.563237	1.64612	0.191911	0.601077	0.271201
GRM6	ENSG00000113262	0.0165546	8.49397	3.08644	0.00438582	0.334175	1	0.0476501	0.0701156	0.0305852	0	0.00748261	0.00750243
PDE1C	ENSG00000154678	1.40374	1.71676	0.779685	0.00437026	0.334175	1	5.12662	4.18784	3.16924	2.2543	3.10491	1.98308
ARMC4	ENSG00000169126	0.452495	1.92535	0.945123	0.00445615	0.337932	1	1.80826	1.33457	0.896519	0.917032	0.607079	0.579234
GRK1	ENSG00000185974	0.227783	2.5984	1.37762	0.00449352	0.339166	1	0.566311	0.670976	0.758154	0.324494	0.215971	0.242019
AC087289.3	ENSG00000267426	0.192006	2.99897	1.58447	0.00456204	0.342728	1	0.657099	0.552728	0.4904	0.208466	0.367272	0
AR	ENSG00000169083	0.631063	-1.89842	-0.924801	0.00461317	0.344958	1	0.983265	1.06523	0.939053	1.532	2.28284	1.92927
LINC00457	ENSG00000225179	0.1874	-2.85597	-1.51398	0.00490151	0.364822	1	0.318413	0.231901	0.0476887	0.538057	0.252784	0.896836
CCDC136	ENSG00000128596	0.219881	4.16922	2.05978	0.00493465	0.365596	1	0.189791	0.473915	1.20197	0.0951555	0.35764	0.0199215
AL133325.3	ENSG00000278041	0.0936058	3.38771	1.76031	0.00497637	0.366996	1	0.107414	0.129319	0.551566	0.0718055	0.118072	0.0507364
NR2F1-AS1	ENSG00000237187	0.00913754	4.07147	2.02555	0.00508783	0.370874	1	0.0173658	0.0441374	0.0200639	0.00580448	0.00545399	0.00820266
RIMS2	ENSG00000176406	0.3275	2.3091	1.20733	0.00509817	0.370874	1	1.02562	0.491533	1.31715	0.28815	0.643589	0.338223
MALAT1	ENSG00000251562	331.259	1.61196	0.688816	0.00508272	0.370874	1	1142.84	1222.51	601.905	731.777	496.112	606.115
BCRP3	ENSG00000215481	0.0836059	15.5703	3.96073	0.00516148	0.373789	1	0	0.211768	0.493549	0	0.0355135	0
INSYN2A	ENSG00000188916	10.1433	-1.76004	-0.815604	0.00524091	0.377839	1	15.0494	23.6795	13.4294	27.2807	24.9933	39.5534
CHN1	ENSG00000128656	2.03172	1.49101	0.576288	0.00536121	0.379868	1	6.78575	7.00079	4.32711	4.2694	4.40163	3.53342
CCSER1	ENSG00000184305	1.15796	1.5961	0.674551	0.00529417	0.379868	1	2.98193	3.25595	3.89851	1.79461	2.78083	1.91021
HK1	ENSG00000156515	1.29174	1.66328	0.734028	0.00533029	0.379868	1	3.59071	5.25727	2.68756	2.4303	2.69696	1.83563
LINC02302	ENSG00000258998	0.267894	2.9002	1.53615	0.00536357	0.379868	1	1.16164	0.842125	0.404078	0.306862	0.205952	0.309746
TRNP1	ENSG00000253368	7.94014	1.87337	0.905633	0.0054926	0.384951	1	19.514	24.6214	25.5483	10.8645	18.9452	8.25747
GNG12-AS1	ENSG00000232284	0.0833513	3.33762	1.73882	0.00547428	0.384951	1	0.227785	0.274237	0.233934	0.0380683	0.107309	0.0717289
LINC00599	ENSG00000253230	1.7504	1.79646	0.845153	0.00550716	0.384951	1	5.04741	3.28273	6.851	2.31004	4.77057	1.67587
BHLHA15	ENSG00000180535	1.87738	2.38951	1.25671	0.00559663	0.389511	1	6.85282	2.91077	6.60248	1.57032	3.72758	1.713
ITPKB	ENSG00000143772	5.01274	-1.7767	-0.8292	0.00565234	0.391693	1	9.82348	11.7121	4.22658	15.4572	8.93982	20.8324
PARM1	ENSG00000169116	1.70197	2.24081	1.16402	0.00568638	0.39236	1	4.61407	3.28238	6.8434	1.6377	4.25943	0.950418
MICB	ENSG00000204516	0.0395886	-8.02599	-3.00468	0.00573094	0.393745	1	0	0.0188673	0.0181063	0.117858	0.177187	0.066621
SLITRK1	ENSG00000178235	0.19985	2.7838	1.47705	0.00577754	0.395257	1	0.434587	0.508679	0.79082	0.292335	0.238855	0.10777
AKNA	ENSG00000106948	2.59348	2.42375	1.27724	0.00586368	0.399451	1	9.25875	2.40524	10.7239	1.57402	7.05	1.08433
ZNF704	ENSG00000164684	8.20995	-1.47698	-0.562654	0.00597945	0.403063	1	13.2603	17.3448	18.9946	21.2828	25.7868	27.4905
ABHD15	ENSG00000168792	13.6372	-1.59594	-0.674403	0.00599192	0.403063	1	24.7981	33.7274	18.8892	40.8714	25.4486	56.7793
BPIFB4	ENSG00000186191	1.06553	-2.99332	-1.58174	0.00594567	0.403063	1	1.79632	1.33702	0.144865	2.99053	2.35429	4.28956
ANKRD33	ENSG00000167612	0.0525935	3.84338	1.94238	0.00602959	0.403907	1	0.136432	0.255508	0.0817338	0.0354683	0	0.0835374
SYT4	ENSG00000132872	0.777564	2.36982	1.24478	0.00621668	0.414712	1	1.72742	1.92389	3.09283	0.872642	1.05011	0.995201
PCDHGB3	ENSG00000262209	0.107213	2.87955	1.52584	0.00633402	0.416482	1	0.49588	0.320614	0.148536	0.0690611	0.0908476	0.169164
ADCYAP1R1	ENSG00000078549	2.57382	1.4432	0.529274	0.00633276	0.416482	1	7.39368	8.20605	7.13352	4.87507	5.17937	5.857
DLL4	ENSG00000128917	0.0375442	5.84662	2.5476	0.00639864	0.416482	1	0.0355765	0.0444179	0.234444	0	0.0260711	0.0261402
CRNDE	ENSG00000245694	0.100272	2.37027	1.24505	0.00635844	0.416482	1	0.383307	0.104088	0.382337	0.0672627	0.231738	0.080267
AL139352.1	ENSG00000132832	0.913767	-2.41554	-1.27235	0.00636459	0.416482	1	0.915725	0.932039	1.50267	1.53705	4.50778	2.32568
RAB39B	ENSG00000155961	0.686509	2.45051	1.29308	0.00637599	0.416482	1	2.22997	0.881649	2.82029	0.657021	1.39812	0.455136
GRIN2A	ENSG00000183454	0.954345	-2.2577	-1.17486	0.00643098	0.416899	1	1.46017	1.02942	1.2879	3.1087	3.00625	2.54963
GADD45A	ENSG00000116717	40.4706	1.77758	0.829917	0.00663789	0.428584	1	102.913	98.4512	150.879	55.4693	105.077	43.9626
PTPRZ1	ENSG00000106278	0.213464	1.59	0.669025	0.00685041	0.440536	1	0.606202	0.661381	0.614713	0.396878	0.434048	0.367772
FN1	ENSG00000115414	3.64062	2.03164	1.02264	0.00693158	0.442625	1	21.1806	8.33134	3.42235	7.7155	4.51392	3.84014
POU3F2	ENSG00000184486	2.68547	1.78596	0.8367	0.00693795	0.442625	1	7.74388	8.12663	7.79883	3.4023	6.26687	3.81587
AL035681.1	ENSG00000235513	0.172329	5.33387	2.41518	0.00701718	0.44591	1	0.434623	0.0232558	0.99314	0.0145272	0.2457	0.0273723
AC125257.1	ENSG00000259623	1.00095	-2.8522	-1.51208	0.00718818	0.454978	1	0.904338	2.19811	0.138324	3.89417	3.55329	1.65411
AL161935.1	ENSG00000223834	0.0685743	4.37218	2.12835	0.00729858	0.458401	1	0.0512672	0.128016	0.399271	0.0199919	0.0751391	0.0376691
UBE2L6	ENSG00000156587	4.81609	1.81574	0.860557	0.00735632	0.458401	1	16.0764	14.7978	11.8423	9.33966	8.6555	5.75549
CSPG4	ENSG00000173546	0.86977	-1.69456	-0.760913	0.00734157	0.458401	1	2.21019	1.66842	0.794448	2.4822	1.96603	3.41781
TBX2	ENSG00000121068	2.49251	2.0046	1.00331	0.0073344	0.458401	1	4.34737	9.42629	8.11314	5.28104	3.28094	2.50298
MYH11	ENSG00000133392	0.00988816	-3.55349	-1.82924	0.00757076	0.469943	1	0.00953976	0.00595529	0.00857262	0.0334808	0.0244682	0.0315425
DZIP1	ENSG00000134874	3.5649	1.41874	0.504606	0.00764306	0.472606	1	11.4418	10.2901	9.75544	8.55759	8.09208	5.82471
STK39	ENSG00000198648	2.38515	1.5844	0.663933	0.00774367	0.476992	1	8.89599	6.74682	5.54386	5.07882	5.50891	2.92124
HHIP	ENSG00000164161	0.0560014	2.48805	1.31502	0.00781454	0.479521	1	0.151106	0.229928	0.118814	0.0718145	0.0726689	0.0572482
LACTBL1	ENSG00000215906	0.555743	-2.43778	-1.28557	0.00784958	0.479839	1	0.858879	0.836416	0.370467	1.44687	0.717519	2.83981
DBI	ENSG00000155368	43.6629	-1.60915	-0.686298	0.00807836	0.491954	1	93.0476	95.1032	57.5871	117.975	115.421	162.21
BMPR1B	ENSG00000138696	1.13542	1.66532	0.735802	0.00816383	0.495282	1	2.93871	2.33338	4.56346	2.07078	2.75805	1.26903
PLPP5	ENSG00000147535	0.993989	1.87634	0.90792	0.00838513	0.506796	1	3.91697	2.44521	2.44538	1.65607	1.82801	1.25724
XPO4	ENSG00000132953	31.3563	1.47113	0.55692	0.00849541	0.50963	1	98.4447	65.204	109.969	53.6232	81.182	56.0104
LINC00649	ENSG00000237945	0.131568	2.26294	1.1782	0.00848803	0.50963	1	0.287075	0.290909	0.558349	0.124215	0.255043	0.138695
AC144548.1	ENSG00000258210	0.848591	-2.68679	-1.42588	0.00853416	0.510051	1	1.43028	0.94867	0.481979	2.78873	2.75136	2.1675
LGALS8	ENSG00000116977	0.278779	1.75597	0.812268	0.00870125	0.512417	1	0.778012	0.859004	0.819138	0.597724	0.472282	0.35195
LINC01237	ENSG00000233806	0.157318	3.42493	1.77607	0.00864547	0.512417	1	0.633843	0.164868	0.569584	0.0823902	0.0387077	0.271671
BEND4	ENSG00000188848	1.84039	1.74324	0.801769	0.00864073	0.512417	1	4.23622	3.42394	8.18023	2.34004	5.0067	2.12032
SLCO5A1	ENSG00000137571	1.80244	1.51905	0.603167	0.0086726	0.512417	1	5.10447	4.55597	6.10574	3.30865	4.61014	2.70316
L1CAM	ENSG00000198910	0.20506	2.33451	1.22312	0.00874072	0.512863	1	0.558417	0.443009	0.780584	0.199611	0.341015	0.239343
FAM168A	ENSG00000054965	6.77352	1.42324	0.509181	0.00878728	0.51372	1	24.089	21.6397	14.6132	13.7894	16.0447	12.8178
SPAG16	ENSG00000144451	0.504673	1.6829	0.750948	0.00891865	0.518076	1	1.97322	1.40656	1.11054	0.838695	0.938159	0.903018
PCDHB16	ENSG00000272674	0.0527763	2.62736	1.39361	0.00895845	0.518076	1	0.14655	0.190008	0.131693	0.0923162	0.0371752	0.0496982
APBB1	ENSG00000166313	0.559543	1.75053	0.807795	0.00892702	0.518076	1	2.01039	1.35903	1.56505	0.842654	1.22902	0.782021
ERO1B	ENSG00000086619	3.78128	2.30454	1.20448	0.00904912	0.51888	1	11.1526	3.99487	17.2956	2.80313	10.5355	1.51366
FAM171B	ENSG00000144369	3.2524	1.90074	0.926562	0.0091529	0.51888	1	10.998	5.11234	12.1548	4.10842	8.71552	2.59122
RFESD	ENSG00000175449	0.12908	2.34988	1.23258	0.0091492	0.51888	1	0.36753	0.594443	0.200163	0.169378	0.061212	0.257771
AC106791.1	ENSG00000250159	0.102951	1.90519	0.929936	0.00916601	0.51888	1	0.369177	0.249221	0.289317	0.125549	0.174593	0.179786
DNM1	ENSG00000106976	0.940552	1.43141	0.51744	0.00911166	0.51888	1	2.86724	2.75834	2.67059	2.00155	1.93246	1.93181
IDI1	ENSG00000067064	16.1742	-1.79137	-0.841065	0.00900503	0.51888	1	23.2644	39.8512	18.8887	52.2314	24.2036	69.2996
CKMT1B	ENSG00000237289	3.40911	-1.50452	-0.589306	0.00936553	0.528314	1	9.37447	6.00932	5.06613	9.57939	12.1442	9.29341
IGSF21	ENSG00000117154	2.29756	1.86606	0.899994	0.00946296	0.531944	1	5.65069	4.54282	9.65455	2.7399	5.82319	2.47885
EBF3	ENSG00000108001	2.37694	-1.62438	-0.699891	0.00957255	0.53623	1	4.30478	5.17287	3.68207	8.68821	5.85796	6.96215
KCND3	ENSG00000171385	3.09954	-2.24914	-1.16937	0.0100249	0.550072	1	5.0476	1.78587	5.32836	5.46885	19.396	3.69824
PIKFYVE	ENSG00000115020	24.9494	1.39765	0.483007	0.00997031	0.550072	1	67.5648	72.9056	78.6304	47.2547	63.0402	49.3458
PCOLCE2	ENSG00000163710	1.99245	1.49788	0.582923	0.00999101	0.550072	1	5.79247	4.9608	6.68219	3.37887	4.99908	3.49983
MUC4	ENSG00000145113	0.0227557	2.59595	1.37626	0.00995715	0.550072	1	0.0777759	0.0878966	0.0385605	0.0219625	0.0383247	0.0177352
SOD2-OT1	ENSG00000285427	0.294733	-2.72576	-1.44666	0.00997164	0.550072	1	0.459415	0.399464	0.117954	0.95974	0.505002	1.19352
AC105052.1	ENSG00000205236	0.405397	2.99809	1.58405	0.0099089	0.550072	1	1.57963	0.857904	1.13559	0.221754	1.00709	0
AGBL1	ENSG00000273540	0.892705	-1.87141	-0.904126	0.0100613	0.55019	1	1.77513	1.11073	1.38645	2.46967	2.8266	2.81123
P4HA1	ENSG00000122884	23.327	1.45892	0.5449	0.0101867	0.55366	1	72.2892	91.3639	45.0432	47.6579	55.9001	39.8766
MAGEL2	ENSG00000254585	0.323456	2.11443	1.08027	0.0102184	0.55366	1	0.952884	0.745597	1.12607	0.397033	0.530893	0.431594
MAPK6	ENSG00000069956	23.8002	-1.37533	-0.459776	0.0102625	0.55366	1	50.7772	51.2582	52.8553	70.7759	77.3446	68.0922
PLCB1	ENSG00000182621	0.638274	1.66765	0.737813	0.0102295	0.55366	1	2.73595	1.70997	1.25111	1.29543	1.27772	0.860014
CYP1B1	ENSG00000138061	2.04063	1.6034	0.681131	0.0103371	0.55477	1	8.35526	6.54481	3.40281	3.94508	3.77935	3.67516
KIAA1324L	ENSG00000164659	0.111318	2.54513	1.34774	0.0103813	0.55477	1	0.496004	0.170082	0.313887	0.12259	0.222696	0.0461971
AL355075.4	ENSG00000259001	7.38607	1.81555	0.860404	0.0103866	0.55477	1	21.1192	19.1966	24.3778	8.68351	12.5302	14.9981
CYP26B1	ENSG00000003137	0.194425	2.88463	1.52839	0.0107613	0.572878	1	0.224833	1.15792	0.36367	0.118361	0.247143	0.235407
AKAP7	ENSG00000118507	0.0504584	2.71175	1.43923	0.0109001	0.578351	1	0.147294	0.229875	0.0772108	0.114876	0.026985	0.0270565
CPLX4	ENSG00000166569	0.321074	2.60592	1.3818	0.011002	0.581839	1	1.11322	1.17644	0.585928	0.613952	0.314662	0.175275
MVK	ENSG00000110921	2.14118	-1.72133	-0.783527	0.0110915	0.58465	1	3.25852	5.50852	2.52994	6.69902	3.63917	8.97359
AC113383.1	ENSG00000250320	0.911905	1.79188	0.841477	0.0111306	0.584793	1	3.22153	2.28887	2.53447	1.63509	1.40546	1.49898
AC022819.1	ENSG00000259921	0.0816397	2.78025	1.47521	0.011176	0.585263	1	0.259535	0.256528	0.20731	0.0674715	0.110946	0.0794567
MAFB	ENSG00000204103	0.442278	2.76503	1.46729	0.0112974	0.589701	1	0.615504	0.405004	2.69077	0.38922	0.58515	0.440025
AGL	ENSG00000162688	9.96735	-1.48031	-0.565899	0.0113414	0.590082	1	18.7162	26.3986	15.7816	29.7627	22.5867	37.7899
AC097376.3	ENSG00000273247	1.26816	1.57277	0.653307	0.0113928	0.590847	1	3.9125	3.23886	3.9808	1.99834	2.4698	2.71851
DHCR24	ENSG00000116133	40.9946	-1.80963	-0.855695	0.0117085	0.601996	1	81.1902	91.394	34.1683	138.625	72.3726	158.808
RBP3	ENSG00000265203	1.09702	-1.59908	-0.677244	0.0117576	0.601996	1	1.74781	2.70722	1.73595	2.65966	2.16682	5.08378
NDRG4	ENSG00000103034	0.0888685	-2.48807	-1.31503	0.0116645	0.601996	1	0.0818156	0.131334	0.10503	0.24612	0.250531	0.309162
DGKE	ENSG00000153933	8.54616	1.40552	0.4911	0.0117298	0.601996	1	25.3373	28.1711	22.175	19.8494	21.6572	12.9787
GCSH	ENSG00000140905	10.9938	-1.48319	-0.568707	0.0118532	0.604967	1	24.6083	28.4986	14.1912	34.6717	27.1344	37.7002
ANK3	ENSG00000151150	1.37122	-1.4089	-0.494566	0.0119843	0.609719	1	3.51056	2.85482	2.39943	4.25283	4.20293	3.98973
SNCAIP	ENSG00000064692	0.257698	2.23668	1.16136	0.0122369	0.620607	1	0.775579	1.06758	0.466957	0.435515	0.349541	0.247891
ADRA2C	ENSG00000184160	1.51079	2.05576	1.03967	0.0123621	0.624555	1	6.72693	3.24642	3.44097	1.84633	3.12841	1.62538
NDRG1	ENSG00000104419	5.22246	1.80392	0.851134	0.0123924	0.624555	1	10.4053	29.6494	7.1585	8.36586	9.7912	7.80564
COL19A1	ENSG00000082293	0.262475	-1.63316	-0.707669	0.0125305	0.627578	1	0.588431	0.479131	0.381638	0.730288	0.88305	0.772601
TTTY9B	ENSG00000131007	0.580038	-2.50526	-1.32496	0.0125081	0.627578	1	0.754894	0.706875	0.616693	1.16412	1.2447	2.83636
RBFOX1	ENSG00000078328	0.0624639	2.35337	1.23473	0.0126298	0.630588	1	0.17699	0.155373	0.213719	0.0452932	0.0851167	0.10363
HMGCR	ENSG00000113161	23.5141	-1.54489	-0.627502	0.0127026	0.632259	1	44.7903	59.2867	33.7605	76.0177	46.4883	89.8337
TBC1D30	ENSG00000111490	0.369976	1.52778	0.611434	0.0127781	0.634052	1	1.036	0.958689	1.24312	0.577475	0.803861	0.772407
APH1B	ENSG00000138613	0.549564	1.62066	0.696581	0.0128557	0.635083	1	1.81259	1.53241	1.50783	0.993602	1.01331	1.01599
STAT3	ENSG00000168610	37.4342	-1.3906	-0.475706	0.0128778	0.635083	1	89.306	86.2731	66.9371	112.02	119.202	108.744
UVRAG	ENSG00000198382	4.801	1.41002	0.495717	0.0129512	0.636749	1	15.042	14.7966	12.6412	9.38215	10.5872	10.4545
HSPA6	ENSG00000173110	0.953333	4.33703	2.11671	0.0131116	0.642667	1	0.119696	6.76976	1.69947	0.140028	1.84203	0.0263843
B4GALT6	ENSG00000118276	6.3282	1.77948	0.831455	0.0132469	0.647326	1	13.5258	10.2278	30.4102	9.13602	16.6899	6.04254
PCNX2	ENSG00000135749	0.399746	1.69163	0.758416	0.0135093	0.64867	1	1.54122	0.92776	1.06254	0.705945	0.990496	0.426907
AC117382.2	ENSG00000261758	0.146247	2.37794	1.24971	0.0135165	0.64867	1	0.375726	0.36858	0.530569	0.125586	0.196671	0.216911
PAK1	ENSG00000149269	5.41892	1.40848	0.494141	0.0134298	0.64867	1	16.4951	17.8511	13.6888	11.172	11.3041	11.8865
FAM81A	ENSG00000157470	1.61677	-1.7872	-0.837701	0.0133529	0.64867	1	2.86387	3.5914	1.75509	5.28006	3.3594	5.96703
SNORD118	ENSG00000200463	6.53875	-2.83615	-1.50394	0.0134118	0.64867	1	3.7865	7.48525	9.07367	22.6407	6.93705	29.2128
FP236383.3	ENSG00000280441	0.161427	-2.27032	-1.1829	0.0135097	0.64867	1	0.0897924	0.300288	0.242068	0.330142	0.676816	0.466544
NBPF10	ENSG00000271425	0.0358858	2.05851	1.0416	0.0136401	0.648794	1	0.0785083	0.091893	0.141098	0.0367377	0.0819836	0.0346109
MET	ENSG00000105976	0.232167	1.69984	0.765401	0.0135655	0.648794	1	1.04445	0.627679	0.406243	0.465038	0.334145	0.420935
GABRQ	ENSG00000268089	1.83959	-1.86592	-0.899886	0.0136287	0.648794	1	3.66083	3.36267	1.91899	6.1793	3.00849	7.39704
ADGRL2	ENSG00000117114	16.3298	-1.46959	-0.555418	0.0138029	0.652603	1	44.4747	37.6629	18.8363	54.6748	46.2185	47.1423
CD302	ENSG00000241399	5.00517	1.6269	0.702126	0.013842	0.652603	1	21.1845	13.9454	9.58054	12.3268	10.0169	5.25794
TENM3	ENSG00000218336	3.19442	-1.43682	-0.522879	0.0137624	0.652603	1	6.86755	7.24389	5.89713	8.76999	8.6326	11.5475
PCDHGA7	ENSG00000253537	0.0408064	3.68952	1.88343	0.0139727	0.656837	1	0.0621918	0.0388238	0.242176	0.0848821	0.0113938	0
SFRP2	ENSG00000145423	2.27828	2.03035	1.02173	0.014041	0.658126	1	6.63755	6.90299	6.54841	4.22947	3.75676	2.05457
NEFL	ENSG00000277586	4.10362	-1.59845	-0.676674	0.0145006	0.67769	1	8.15244	9.24355	5.81628	10.8932	11.3234	14.9848
REC8	ENSG00000100918	0.116884	2.31676	1.21211	0.014605	0.680593	1	0.337322	0.274665	0.408559	0.0686299	0.225701	0.145478
MSN	ENSG00000147065	0.103741	-2.59449	-1.37545	0.0146491	0.680677	1	0.169498	0.123446	0.0676951	0.396579	0.186317	0.352864
AC107871.1	ENSG00000260007	0.570068	-2.10722	-1.07534	0.0147121	0.681632	1	0.526886	0.47886	1.35775	1.405	2.30816	1.48591
IGFBP7	ENSG00000163453	1.27967	-1.9845	-0.988772	0.0148956	0.686179	1	2.01554	2.43439	1.36497	5.22843	2.82562	3.50919
UBE2J1	ENSG00000198833	39.9692	1.44193	0.528001	0.0148889	0.686179	1	128.838	102.97	119.767	78.1335	112.155	58.524
OGFRL1	ENSG00000119900	7.68963	-1.37675	-0.461263	0.0149931	0.687962	1	19.636	16.5805	14.0456	25.4585	23.9685	20.3754
ZMAT4	ENSG00000165061	8.11005	-1.55052	-0.63275	0.0150199	0.687962	1	18.5122	19.0653	9.88246	27.625	21.5077	24.3255
AC009879.2	ENSG00000285655	1.09622	5.20843	2.38085	0.0151411	0.688072	1	7.28749	1.51643	1.09145	0	1.55762	0.33466
GREB1L	ENSG00000141449	0.340449	1.71567	0.778774	0.0151507	0.688072	1	1.0452	0.863866	1.07821	0.461649	0.814791	0.493696
RUNX1	ENSG00000159216	0.015532	3.6926	1.88464	0.0150741	0.688072	1	0.0108598	0.00677934	0.1106	0.00846968	0.0278539	0
ARHGEF17	ENSG00000110237	0.829242	1.71265	0.776232	0.0151992	0.68833	1	2.65944	2.17101	2.46643	1.52236	1.77399	1.03966
TMEM17	ENSG00000186889	0.206461	2.12047	1.08439	0.0153599	0.689781	1	0.585488	0.79584	0.458243	0.265139	0.24913	0.353868
AC106897.1	ENSG00000249679	0.0185362	6.3227	2.66054	0.0153069	0.689781	1	0.0707236	0.0378428	0.0544745	0	0.0222118	0
BRINP1	ENSG00000078725	0.111663	-1.90803	-0.932084	0.0153373	0.689781	1	0.174631	0.163523	0.183082	0.340492	0.33593	0.336819
BBX	ENSG00000114439	3.64411	1.37446	0.45887	0.0155127	0.694702	1	9.14488	12.4741	10.5267	6.49994	9.63542	7.59186
LBH	ENSG00000213626	0.0654544	2.59171	1.3739	0.0156087	0.69706	1	0.0995178	0.0465937	0.402429	0.0436584	0.150415	0.0274206
KCNN3	ENSG00000143603	2.66689	-1.94102	-0.956818	0.0157572	0.697874	1	3.61916	2.65137	5.8302	6.52307	13.0787	4.81583
TM4SF18	ENSG00000163762	0.514923	-2.21226	-1.14552	0.0156931	0.697874	1	0.60815	1.10258	0.406965	1.16557	1.12364	2.36732
AP1G1	ENSG00000166747	5.74963	-1.35962	-0.443205	0.0157308	0.697874	1	13.5089	14.3083	10.3214	16.8067	16.4974	18.8386
BHLHE41	ENSG00000123095	0.0554484	2.45778	1.29736	0.015812	0.698376	1	0.0585125	0.109581	0.302338	0.0342259	0.144717	0.0161222
AC012181.2	ENSG00000261270	0.480431	3.06576	1.61624	0.0158806	0.699488	1	1.68849	0.527029	1.93879	0.109739	0.618679	0.620318
NHLH1	ENSG00000171786	0.249903	2.80187	1.48639	0.016478	0.723816	1	0.507105	0.309683	1.30764	0.15476	0.339302	0.2916
AKAP13	ENSG00000170776	17.1648	-1.38077	-0.465473	0.0165753	0.724617	1	41.3791	42.1675	28.7505	49.0227	48.0917	58.5075
LINC00654	ENSG00000205181	0.208294	2.06497	1.04612	0.0165864	0.724617	1	0.80937	0.529214	0.507867	0.269364	0.352805	0.27684
PGM1	ENSG00000079739	3.25289	1.51482	0.59915	0.016718	0.728387	1	9.91469	12.3916	6.73496	6.76196	6.42966	6.01996
SCARNA5	ENSG00000252010	31.9246	1.62083	0.696729	0.0168144	0.730609	1	95.7997	58.5288	122.799	51.8546	68.707	55.1562
COL11A1	ENSG00000060718	5.16225	1.45222	0.538255	0.0171462	0.740538	1	17.0848	18.797	10.2482	11.5424	9.52981	10.6828
TDRD10	ENSG00000163239	0.409916	2.26229	1.17778	0.0171261	0.740538	1	0.93753	1.28758	1.36669	0.584952	0.68704	0.34443
CCND2	ENSG00000118971	224.76	-1.41968	-0.505563	0.0173654	0.740538	1	468.675	598.015	365.313	671.501	515.664	845.705
PCDH8	ENSG00000136099	21.8881	-1.58684	-0.666156	0.0172898	0.740538	1	27.7834	47.9934	47.2872	67.3365	78.0594	53.7258
WSCD1	ENSG00000179314	0.425011	-1.51134	-0.595827	0.0173434	0.740538	1	0.987542	0.80636	0.738338	1.00742	1.71949	1.14936
SRRM5	ENSG00000226763	0.114448	2.8678	1.51995	0.0172267	0.740538	1	0.125328	0.547662	0.337867	0.19549	0.0918429	0.0690646
AMMECR1	ENSG00000101935	5.11712	-1.40651	-0.492125	0.0172871	0.740538	1	11.7326	13.4674	7.72422	17.3643	13.9099	15.0894
AC022148.1	ENSG00000180458	0.135725	2.5869	1.37123	0.0175203	0.745169	1	0.603976	0.290858	0.31014	0.161502	0.189688	0.114114
AC110813.1	ENSG00000249690	5.42225	1.66347	0.734196	0.0177144	0.745536	1	16.2571	14.1476	17.1776	8.957	10.3799	9.73235
AC025164.1	ENSG00000245904	0.0583339	2.49175	1.31716	0.0175952	0.745536	1	0.128835	0.109672	0.263121	0.0205526	0.148056	0.0387255
TMOD2	ENSG00000128872	0.708712	-1.55105	-0.633249	0.0176968	0.745536	1	1.77469	1.57985	0.795201	2.54826	1.37357	2.47576
BEX1	ENSG00000133169	4.73409	2.05377	1.03828	0.0177118	0.745536	1	15.8139	10.2261	15.4214	6.55386	8.2628	5.78365
AC092587.1	ENSG00000273155	0.259986	-3.9977	-1.99917	0.0178376	0.74876	1	0.421351	0.0789099	0.0757269	0.59151	0.648426	1.11453
AL606500.1	ENSG00000287064	3.80247	-1.86444	-0.898745	0.0179878	0.753099	1	5.02049	7.03013	6.20849	10.615	13.4169	10.5589
STEAP2	ENSG00000157214	0.0359942	1.9967	0.99762	0.0180863	0.753301	1	0.0775828	0.108972	0.127815	0.0453808	0.0852812	0.0285024
LINC00598	ENSG00000215483	0.0266718	2.54792	1.34932	0.0180736	0.753301	1	0.037254	0.0536682	0.136484	0.0134099	0.0535509	0.0252672
GPC2	ENSG00000213420	2.69315	1.47812	0.563759	0.0181834	0.755388	1	8.25743	7.25064	8.17288	4.81286	6.62187	4.8581
NEURL1B	ENSG00000214357	0.303655	2.12859	1.0899	0.0184336	0.761972	1	0.8421	0.772106	1.0405	0.307858	0.559253	0.406049
CCDC71L	ENSG00000253276	0.942437	1.84149	0.880875	0.0184743	0.761972	1	2.78609	1.99547	3.42759	1.29016	1.94144	1.34341
CABLES1	ENSG00000134508	0.410522	1.5934	0.672109	0.0184841	0.761972	1	0.669337	1.21385	1.67501	0.723564	0.782321	0.784393
NOL4L	ENSG00000197183	0.807562	1.66737	0.737572	0.0185709	0.76359	1	2.97757	1.788	2.34325	1.11691	2.42033	0.828644
AC093227.1	ENSG00000267152	0.789091	-2.38053	-1.25129	0.018645	0.764684	1	1.49233	0.6987	0.78227	3.58864	1.13917	2.37576
AP003548.1	ENSG00000253105	3.52953	-1.80338	-0.850702	0.0187004	0.765005	1	4.67359	6.87704	5.99968	8.90417	8.07296	14.9525
ARFGEF3	ENSG00000112379	0.892163	2.2899	1.19528	0.0187841	0.766478	1	1.82497	0.955697	4.7869	0.661353	2.46066	0.393075
LINC01977	ENSG00000262772	0.37316	2.66365	1.41341	0.0189431	0.77101	1	1.03237	0.740127	1.46403	0.396286	0.549671	0.302231
TXNIP	ENSG00000265972	1.27147	1.54711	0.629573	0.0194008	0.78379	1	3.66043	3.20787	4.25926	1.9764	3.11231	2.25852
SESN3	ENSG00000149212	14.0125	1.44518	0.531245	0.0193788	0.78379	1	55.2469	41.3073	28.4485	29.8717	31.7705	25.2758
PPFIBP1	ENSG00000110841	1.49074	1.41327	0.499037	0.0194034	0.78379	1	4.51883	5.73969	3.05528	2.68553	3.50939	3.25293
AP001020.2	ENSG00000264635	0.209097	2.61729	1.38807	0.019503	0.785841	1	0.737641	0.756502	0.378776	0.16437	0.424723	0.11614
MGP	ENSG00000111341	22.7588	-1.77073	-0.824341	0.0196827	0.789125	1	37.1614	65.7004	15.1615	64.7654	46.8163	94.0528
MEIOC	ENSG00000180336	1.10053	1.68014	0.748579	0.019672	0.789125	1	3.24735	3.23696	3.2123	1.89948	2.04387	1.90497
GABBR1	ENSG00000204681	0.0092207	8.49579	3.08675	0.0199142	0.794445	1	0.0332882	0.0311707	0.017948	0.00778854	0	0
AL136982.1	ENSG00000151303	0.0960423	2.34225	1.2279	0.0199063	0.794445	1	0.383263	0.196807	0.266638	0.144635	0.122311	0.0953829
AP002748.5	ENSG00000256349	0.418766	5.18333	2.37388	0.0199722	0.794784	1	0	2.2176	1.45685	0	0	0.700706
MAN1C1	ENSG00000117643	0.0254484	-2.39509	-1.26008	0.0200509	0.795948	1	0.0124921	0.0409412	0.0392897	0.0730704	0.08239	0.0757242
BCAR1	ENSG00000050820	2.49803	-1.39598	-0.481276	0.0203112	0.804294	1	5.60152	5.24521	5.19335	7.47792	8.60952	6.62622
LINC01483	ENSG00000227517	0.259271	2.42683	1.27907	0.0204481	0.807723	1	0.797427	0.43854	1.01232	0.236923	0.361753	0.34876
LIFR	ENSG00000113594	0.698294	1.69474	0.761066	0.0206024	0.810802	1	2.69852	2.15782	1.37913	1.46997	1.2436	0.976052
SCRN1	ENSG00000136193	1.86858	1.39229	0.477465	0.0206269	0.810802	1	7.28014	5.38556	3.97886	3.4896	4.60069	3.93481
PDZD2	ENSG00000133401	2.05511	-1.40565	-0.491242	0.0208517	0.811476	1	4.07902	5.3845	3.72276	5.47609	5.2622	7.87519
PFKFB3	ENSG00000170525	14.0346	1.39936	0.484765	0.0207024	0.811476	1	27.9763	58.4635	37.8427	29.8052	36.3677	23.6284
B4GALNT4	ENSG00000182272	2.18966	1.49038	0.575683	0.0208355	0.811476	1	6.778	5.5795	6.86468	4.37089	5.90854	2.89321
MPHOSPH6	ENSG00000135698	11.3182	-1.53853	-0.621556	0.0208594	0.811476	1	22.829	29.5802	14.4019	34.2427	23.8481	44.1875
ULK2	ENSG00000083290	0.876651	-1.39904	-0.484441	0.0208964	0.811476	1	2.13098	2.07033	1.45289	2.66674	2.36128	2.91534
CTHRC1	ENSG00000164932	1.34108	1.92835	0.947368	0.0210548	0.815657	1	5.26614	3.20677	3.39678	2.22994	2.27286	1.70916
ZDHHC22	ENSG00000177108	9.39107	1.74318	0.801724	0.021417	0.827695	1	25.4002	15.4736	40.1276	12.5861	26.1395	9.6694
RNVU1-18	ENSG00000206737	25.0801	2.2109	1.14463	0.0215482	0.828868	1	45.0327	71.4606	101.014	44.6392	13.2255	42.0549
HIST1H3C	ENSG00000287080	0.646216	6.86093	2.7784	0.0215505	0.828868	1	1.10543	4.48548	0.33112	0	0.540052	0.270741
STPG2	ENSG00000163116	0.0238061	3.88253	1.957	0.0220738	0.845191	1	0.0278358	0.0781956	0.100055	0	0.0101993	0.0409053
FAM174B	ENSG00000185442	9.7973	-1.41129	-0.497017	0.0221326	0.845191	1	21.4835	20.3296	20.4164	28.1287	27.5257	33.174
HES7	ENSG00000179111	0.12349	3.17947	1.66878	0.0221048	0.845191	1	0.239901	0.224641	0.592845	0.140326	0.164817	0.0330506
TNC	ENSG00000041982	0.028385	2.23491	1.16022	0.0225012	0.857232	1	0.105279	0.0602446	0.0840939	0.0547388	0.0450044	0.0128924
KLHL7	ENSG00000122550	1.8078	1.43803	0.52409	0.022798	0.860385	1	4.61163	7.03029	4.41655	3.83623	3.59583	3.79881
CREBZF	ENSG00000137504	13.9657	1.3724	0.456703	0.0227517	0.860385	1	38.7887	35.1875	48.0861	26.8441	37.6241	26.5579
TRHDE	ENSG00000072657	0.0295579	2.20292	1.13942	0.0227235	0.860385	1	0.068954	0.0860905	0.103272	0.0484002	0.0555839	0.0151994
AC016705.2	ENSG00000259495	0.0125763	4.42793	2.14663	0.0227695	0.860385	1	0.0279474	0.0523393	0.0313926	0.0163473	0	0.00770048
CNNM1	ENSG00000119946	0.793261	1.41653	0.502361	0.023185	0.87294	1	2.47267	2.71843	1.85989	1.53206	2.10395	1.3828
ATP6V1C2	ENSG00000143882	0.974835	1.74386	0.802286	0.0233165	0.875838	1	3.1875	2.90937	2.53162	1.88331	1.7342	1.38394
ADORA1	ENSG00000163485	0.0217968	-4.63199	-2.21163	0.02361	0.882739	1	0.0134519	0.0251924	0	0.0629476	0.0295734	0.103781
DARS-AS1	ENSG00000231890	0.130977	2.08696	1.0614	0.0235715	0.882739	1	0.266171	0.635161	0.27005	0.261162	0.169887	0.132484
SDC1	ENSG00000115884	0.657984	2.06419	1.04558	0.0239114	0.886011	1	2.10652	1.43191	2.21547	1.38734	1.01198	0.447139
AC083843.2	ENSG00000254028	0.165958	3.15404	1.6572	0.0238476	0.886011	1	0.398423	0.248719	0.775733	0.233051	0.218979	0
SCARNA10	ENSG00000239002	381.913	1.47317	0.558922	0.0239686	0.886011	1	965.923	912.959	1442.62	661.133	764.309	881.942
IGDCC3	ENSG00000174498	0.196328	1.78795	0.838303	0.0238078	0.886011	1	0.449869	0.440401	0.808523	0.33491	0.427076	0.214104
FASN	ENSG00000169710	47.3155	-1.36061	-0.44425	0.0239731	0.886011	1	107.631	111.557	93.496	155.398	124.374	148.775
TMEM37	ENSG00000171227	1.67338	-1.91518	-0.937479	0.0240783	0.887861	1	4.25718	1.84341	1.79117	5.46972	4.65256	5.04458
PXDN	ENSG00000130508	9.63318	1.35181	0.434892	0.0243552	0.890187	1	32.8623	29.0335	23.5544	22.082	20.0556	21.4986
TMEM108	ENSG00000144868	0.593715	1.78193	0.833444	0.0243019	0.890187	1	1.9138	1.89859	1.4552	1.0803	1.05921	0.84076
SIK3	ENSG00000160584	3.32926	1.36915	0.453278	0.0242562	0.890187	1	10.279	9.12235	9.9003	7.09663	8.87003	5.80383
TLR8-AS1	ENSG00000233338	2.33095	1.84581	0.88425	0.0243629	0.890187	1	6.60307	7.82664	6.19653	2.78676	4.22634	4.23753
U95743.1	ENSG00000262267	0.15925	2.31438	1.21063	0.0245066	0.893408	1	0.405913	0.485674	0.506613	0.211051	0.173519	0.223687
TRABD2B	ENSG00000269113	0.0660219	2.17674	1.12217	0.0248001	0.893972	1	0.142366	0.175408	0.255865	0.0701259	0.14002	0.0578078
NDUFA4	ENSG00000189043	22.6772	-1.37093	-0.45516	0.0247663	0.893972	1	55.6601	58.8461	35.2038	74.5477	61.2369	69.6754
KLRG2	ENSG00000188883	0.399371	2.02261	1.01622	0.0246242	0.893972	1	1.3846	0.929586	1.19728	0.611245	0.804072	0.345515
NID2	ENSG00000087303	0.120395	-2.09496	-1.06692	0.0246749	0.893972	1	0.123479	0.181695	0.206069	0.278589	0.610791	0.213857
KCNG1	ENSG00000026559	0.0484237	-2.44947	-1.29247	0.024719	0.893972	1	0.0728786	0.0194979	0.0842016	0.146157	0.251775	0.0458985
PM20D2	ENSG00000146281	18.2957	1.33348	0.415201	0.0249098	0.895915	1	52.1213	64.2401	45.9108	41.2857	38.1603	42.9912
LTBP3	ENSG00000168056	1.93865	1.35278	0.435929	0.0249729	0.896182	1	6.59217	5.67328	4.90807	4.38124	4.56959	3.86562
SCD5	ENSG00000145284	4.66772	-1.60486	-0.68245	0.025138	0.898097	1	11.4726	8.60921	6.20245	14.1384	14.7201	13.5255
TBL1Y	ENSG00000092377	5.709	1.69692	0.762918	0.0250976	0.898097	1	14.7761	12.3681	22.3875	8.64303	13.9759	7.50356
PIGP	ENSG00000185808	0.804719	1.42543	0.511394	0.0252755	0.901006	1	2.2841	1.96558	2.78148	1.44843	2.17442	1.41947
FAM201A	ENSG00000204860	0.151614	2.27202	1.18398	0.025964	0.921934	1	0.337059	0.356787	0.618945	0.205729	0.306069	0.0807579
HERPUD1	ENSG00000051108	5.46355	1.90139	0.927057	0.0259772	0.921934	1	18.4879	6.82045	21.9579	5.38102	15.5234	5.00813
RAB30	ENSG00000137502	1.49487	1.58915	0.668251	0.0260373	0.922028	1	4.37883	5.27372	3.62234	2.74248	2.85972	2.80427
LRP4	ENSG00000134569	0.495971	-1.43996	-0.526027	0.0262854	0.928771	1	1.20513	0.995709	0.891843	1.93005	1.62224	0.951773
KCNT2	ENSG00000162687	0.209915	1.7098	0.773832	0.0268945	0.936596	1	0.666993	0.446119	0.720675	0.278676	0.610982	0.210034
CHRNA1	ENSG00000138435	0.297825	-2.02023	-1.01452	0.0267089	0.936596	1	0.656729	0.540736	0.152625	0.75504	0.24893	1.67225
LRRC1	ENSG00000137269	11.3992	-1.44529	-0.531356	0.0267944	0.936596	1	23.1558	30.7955	17.4798	33.737	24.7833	44.5253
FRMPD1	ENSG00000070601	1.93851	-1.41116	-0.496886	0.0267089	0.936596	1	3.83282	5.44602	3.14438	5.29813	5.24023	7.03
IFITM2	ENSG00000185201	1.414	2.06198	1.04403	0.0269147	0.936596	1	3.14219	3.28445	5.81144	2.99205	1.64667	1.44969
CTSC	ENSG00000109861	4.31878	1.40102	0.486475	0.0267938	0.936596	1	12.1164	16.5576	9.78103	10.7192	6.88506	9.84238
MEIS2	ENSG00000134138	0.277723	1.63893	0.712756	0.0268767	0.936596	1	0.615001	0.741812	1.05847	0.402415	0.65311	0.453793
SHISAL1	ENSG00000138944	1.37726	-1.9271	-0.94643	0.0270252	0.938409	1	2.39394	3.30471	0.850146	4.53291	2.82139	5.0865
NPSR1-AS1	ENSG00000197085	0.674115	-1.85076	-0.888114	0.0272643	0.938605	1	0.698165	1.58238	0.998112	1.69849	2.00582	2.41335
SCD	ENSG00000099194	65.6352	-1.43972	-0.525788	0.0271696	0.938605	1	126.727	173.842	111.252	204.625	139.42	249.097
RNU1-28P	ENSG00000206588	25.3007	2.18687	1.12887	0.0272236	0.938605	1	39.8763	72.7482	106.265	43.0305	11.3362	47.3591
CEBPB	ENSG00000172216	17.0609	2.11613	1.08143	0.0272489	0.938605	1	49.6631	21.0991	75.9231	16.5332	40.7074	15.2381
BAALC	ENSG00000164929	0.0843801	2.33828	1.22545	0.0274556	0.943172	1	0.254077	0.118957	0.355162	0.0660524	0.201708	0.0466714
MAP4K5	ENSG00000012983	10.6343	1.33114	0.412664	0.0275432	0.944162	1	33.0862	29.0903	31.4406	23.3174	29.6192	18.6324
AL603756.1	ENSG00000271933	0.10061	2.98659	1.5785	0.0278297	0.951955	1	0.182449	0.292875	0.39817	0.121966	0.0859515	0.0861791
FNDC10	ENSG00000228594	8.04099	-1.62659	-0.701847	0.0278954	0.952174	1	14.7843	12.8746	16.4101	28.5363	22.6702	21.6771
THEM4	ENSG00000159445	0.0172219	3.24608	1.6987	0.0280687	0.956059	1	0.0568888	0.0684902	0.0292122	0.019015	0.0178668	0.00895706
CSMD3	ENSG00000164796	0.0076553	2.68877	1.42695	0.0281911	0.958198	1	0.0248636	0.0258689	0.0173778	0.0129276	0	0.0121792
ATP2B4	ENSG00000058668	8.01897	-1.61296	-0.689707	0.0283509	0.958983	1	17.1317	19.4035	8.72932	20.4964	17.1805	34.8164
AC079594.2	ENSG00000248710	0.0271973	5.64373	2.49665	0.0283931	0.958983	1	0	0.0628461	0.165855	0	0.0368875	0
SYNE1	ENSG00000131018	0.145284	1.38453	0.469397	0.0283916	0.958983	1	0.524087	0.447781	0.321204	0.293842	0.292028	0.351362
OR2T33	ENSG00000177212	0.232093	-2.07425	-1.05259	0.0285071	0.959084	1	0.272879	0.447162	0.281997	0.590579	0.719896	0.79699
GPRIN3	ENSG00000185477	15.2443	-1.39586	-0.481152	0.0285751	0.959084	1	30.9475	42.7134	25.1651	41.6133	37.3239	59.057
SEPTIN4	ENSG00000108387	0.184601	1.69948	0.765091	0.0285532	0.959084	1	0.661948	0.411491	0.549851	0.364419	0.360759	0.24523
AL035587.1	ENSG00000231113	0.686298	2.02163	1.01552	0.0286866	0.960822	1	1.51347	1.48806	2.92408	1.01807	1.24774	0.750626
DST	ENSG00000151914	26.1841	1.36881	0.452924	0.0287794	0.961926	1	91.8609	67.5762	71.717	51.5569	68.7126	51.1441
KIAA0408	ENSG00000189367	0.0837187	2.26615	1.18024	0.0288419	0.962016	1	0.239928	0.17282	0.315113	0.158334	0.0676244	0.101705
TAFA4	ENSG00000163377	0.889264	2.05287	1.03764	0.0290532	0.967056	1	2.42481	3.29232	2.17898	1.60071	1.67541	0.610852
ERBIN	ENSG00000112851	9.75494	1.33275	0.414403	0.0291264	0.967489	1	32.8129	29.3511	24.3091	19.2127	22.7902	23.4345
RAB43	ENSG00000172780	0.164013	2.56669	1.35991	0.0293934	0.971017	1	0.463124	0.655785	0.345118	0.330361	0.0620828	0.174292
HERC5	ENSG00000138646	5.08735	1.42316	0.509093	0.029428	0.971017	1	15.822	18.7383	10.815	12.0998	9.95126	9.89936
SLC5A12	ENSG00000148942	0.0443737	2.75803	1.46364	0.0294742	0.971017	1	0.0670178	0.083673	0.227511	0.0174226	0.0736678	0.049242
EGLN3	ENSG00000129521	4.2744	1.69241	0.759078	0.0293451	0.971017	1	12.8634	19.6666	6.02734	10.5966	5.31084	6.61605
CDH6	ENSG00000113361	0.0095868	3.24756	1.69936	0.0295896	0.972027	1	0.0453081	0.0381834	0.00407147	0.0106009	0.0149412	0
KIF21A	ENSG00000139116	1.51318	1.33582	0.417722	0.0296258	0.972027	1	4.90379	4.69622	3.81074	2.85535	3.92028	3.35949
GABRR3	ENSG00000183185	0.864112	2.11746	1.08233	0.0299418	0.980395	1	1.7003	1.28667	4.37945	0.878916	2.18414	0.599234
KANK1	ENSG00000107104	2.11472	1.32697	0.408136	0.0301247	0.98438	1	5.68597	6.64539	6.29225	4.20378	4.78261	5.22837
PLAT	ENSG00000104368	0.0570558	-2.4177	-1.27363	0.0301989	0.984801	1	0.0954865	0.0819616	0.0357525	0.148942	0.148695	0.219249
CPE	ENSG00000109472	42.1336	1.32184	0.402549	0.0305715	0.988875	1	140.499	125.3	107.381	90.7149	97.6754	96.4997
CAV1	ENSG00000105974	3.18645	-1.75063	-0.807876	0.0305128	0.988875	1	5.27895	7.44204	3.78715	10.1847	6.76455	11.8452
SYBU	ENSG00000147642	0.754415	2.06717	1.04766	0.0306313	0.988875	1	3.66542	0.705979	2.24873	0.675579	2.26583	0.371273
KMT5B	ENSG00000110066	6.30727	1.33501	0.416847	0.0305062	0.988875	1	19.3714	18.9158	17.4134	12.989	16.4189	12.8776
CXADR	ENSG00000154639	5.64258	-1.35281	-0.435955	0.0305683	0.988875	1	16.1331	13.2393	8.38886	18.1615	15.9122	17.0792
ICA1L	ENSG00000163596	0.300368	1.61118	0.688117	0.0307242	0.989887	1	1.18626	0.946427	0.554511	0.578757	0.520421	0.568702
FSCN1	ENSG00000075618	14.9178	1.56692	0.647929	0.0308164	0.990871	1	56.8341	47.8955	28.6108	36.1237	27.4254	21.6524
CDS1	ENSG00000163624	0.410864	1.76407	0.818911	0.0308907	0.991278	1	1.09901	0.747327	1.70478	0.71938	0.81976	0.533535
HEBP2	ENSG00000051620	5.21912	1.31699	0.397246	0.0310062	0.993003	1	14.5517	15.1508	16.1644	11.0984	13.4095	10.9001
AC124798.1	ENSG00000260196	0.392384	1.65922	0.730509	0.0310821	0.993454	1	1.19285	1.06204	1.19493	0.571916	0.881308	0.646568
FAM138A	ENSG00000237613	0.101162	1.17308	0.2303	0.79886	0.999994	1	0.647478	0.0433066	0.207799	0.0541045	0.355863	0.356806
AL627309.1	ENSG00000238009	0.33639	-1.03659	-0.0518506	0.887716	0.999994	1	1.11967	0.991774	0.815802	1.02665	1.14761	0.883833
AL627309.5	ENSG00000241860	1.06087	1.15452	0.207288	0.428849	0.999994	1	3.28162	2.89829	3.1567	2.43432	3.30392	2.47423
AC114498.2	ENSG00000278791	6.2643	-1.46017	-0.546132	0.268262	0.999994	1	13.9358	8.30415	15.9384	18.5262	19.4965	18.85
LINC01409	ENSG00000237491	0.662302	-1.06157	-0.0861959	0.805257	0.999994	1	1.24641	1.41185	2.83024	1.86579	2.34242	1.81686
LINC01128	ENSG00000228794	0.541117	-1.16796	-0.223986	0.353235	0.999994	1	1.37273	1.78343	1.03597	1.61286	1.166	2.11221
LINC00115	ENSG00000225880	0.810492	1.24075	0.311211	0.46956	0.999994	1	1.88351	2.04429	3.11584	2.00314	2.25862	1.55692
FAM41C	ENSG00000230368	0.247689	1.22886	0.297325	0.533864	0.999994	1	0.886698	0.749944	0.565474	0.602314	0.471621	0.725068
AL645608.6	ENSG00000272438	1.64315	-1.84853	-0.886377	0.0856136	0.999994	1	2.7305	2.40641	2.74235	6.38864	4.23733	4.24856
AL645608.2	ENSG00000230699	1.75051	-1.71035	-0.774293	0.0432001	0.999994	1	3.66829	2.81041	2.7137	6.11201	4.29704	5.43146
LINC02593	ENSG00000223764	0.398665	-1.37027	-0.454457	0.460456	0.999994	1	1.01837	1.37317	0.280638	1.19135	0.746279	1.66113
SAMD11	ENSG00000187634	4.3991	-1.50634	-0.591044	0.207494	0.999994	1	7.68713	15.6993	3.44783	14.2243	6.28175	19.1185
NOC2L	ENSG00000188976	11.4602	-1.06502	-0.090877	0.636213	0.999994	1	34.3451	37.6015	25.1843	39.9054	30.9184	32.9967
KLHL17	ENSG00000187961	3.5873	1.22301	0.290433	0.228781	0.999994	1	11.3019	9.96226	10.3497	8.76276	10.4742	7.01349
HES4	ENSG00000188290	0.0303197	-1.84519	-0.883768	0.426266	0.999994	1	0.0504265	0.0944377	0	0.0589923	0.221721	0
AGRN	ENSG00000188157	0.0395976	-1.27731	-0.353109	0.317899	0.999994	1	0.136214	0.0833976	0.0612022	0.11645	0.103659	0.138579
C1orf159	ENSG00000131591	1.10841	-1.0379	-0.0536631	0.851364	0.999994	1	3.10331	3.81609	2.70055	3.42181	3.09757	3.5284
SDF4	ENSG00000078808	7.44793	1.02222	0.031704	0.870091	0.999994	1	23.0973	20.2485	22.197	22.5173	23.2342	19.3411
B3GALT6	ENSG00000176022	18.6086	-1.14967	-0.201223	0.398986	0.999994	1	43.3529	38.9578	61.209	52.2454	71.0513	46.2082
UBE2J2	ENSG00000160087	5.9513	1.04224	0.0596807	0.776794	0.999994	1	16.4751	18.0376	17.8691	17.5101	16.729	16.6942
SCNN1D	ENSG00000162572	0.442787	-1.20816	-0.272817	0.491986	0.999994	1	1.10653	1.04926	1.12021	1.50751	1.40108	1.11149
ACAP3	ENSG00000131584	2.66309	1.03554	0.0503808	0.805496	0.999994	1	8.3008	7.68184	7.51163	7.91562	7.66542	7.37886
PUSL1	ENSG00000169972	2.4968	-1.04354	-0.0614817	0.846445	0.999994	1	6.71753	6.99868	7.66409	7.61722	7.53531	7.50473
INTS11	ENSG00000127054	3.52812	1.03635	0.051509	0.807251	0.999994	1	10.7884	9.69114	10.5637	9.3795	10.9467	10.0837
AL139287.1	ENSG00000240731	1.01925	1.31093	0.390591	0.461749	0.999994	1	2.77503	2.73527	3.41242	2.90468	1.76601	2.25361
CPTP	ENSG00000224051	2.58431	-1.13774	-0.186166	0.516084	0.999994	1	6.22241	6.67374	7.39596	7.69241	7.85855	7.90369
DVL1	ENSG00000107404	17.4597	1.04114	0.0581624	0.754933	0.999994	1	45.8334	49.2686	57.852	49.3886	56.7349	43.6803
MXRA8	ENSG00000162576	8.68997	-1.01627	-0.0232858	0.921874	0.999994	1	26.6786	22.4747	27.149	25.693	29.4285	23.7939
AURKAIP1	ENSG00000175756	12.6519	-1.06268	-0.0877085	0.678124	0.999994	1	39.6563	42.8272	25.2548	43.4288	30.2243	40.8029
CCNL2	ENSG00000221978	13.1844	1.15647	0.209733	0.356636	0.999994	1	34.9673	31.6806	48.2158	33.0873	41.4646	27.3569
MRPL20-AS1	ENSG00000224870	3.5739	-1.01237	-0.0177322	0.946669	0.999994	1	10.2848	9.02476	11.9687	11.0923	11.1092	10.0567
MRPL20	ENSG00000242485	13.0558	-1.06239	-0.0873094	0.672455	0.999994	1	36.0225	44.0527	30.7044	44.3821	34.7145	39.1629
AL391244.2	ENSG00000272455	1.36376	-1.19308	-0.254688	0.469515	0.999994	1	2.96136	3.39691	3.85864	3.94075	5.00488	3.46782
ANKRD65	ENSG00000235098	0.0892219	1.65134	0.723637	0.2461	0.999994	1	0.298516	0.239595	0.249091	0.149667	0.164068	0.164503
VWA1	ENSG00000179403	0.430903	1.12129	0.165163	0.656174	0.999994	1	1.32455	1.31325	1.17026	1.2761	1.07669	1.07954
ATAD3B	ENSG00000160072	2.21363	-1.04689	-0.0661062	0.753937	0.999994	1	5.68463	7.13629	6.14316	7.24234	6.70829	6.13591
ATAD3A	ENSG00000197785	9.8098	-1.07493	-0.104239	0.676547	0.999994	1	25.5921	32.1575	24.3611	34.1206	25.5186	29.1909
SSU72	ENSG00000160075	11.8915	-1.13358	-0.180886	0.317794	0.999994	1	29.7162	33.8535	30.5037	37.0994	36.8655	33.9817
AL645728.1	ENSG00000215014	0.309414	-1.13324	-0.180459	0.679788	0.999994	1	0.480007	0.921421	1.01366	1.06693	1.00251	0.740649
AL691432.2	ENSG00000272106	1.10869	1.05678	0.0796782	0.833542	0.999994	1	3.18122	2.56442	3.92762	3.20382	4.13545	2.04272
MIB2	ENSG00000197530	1.17119	1.32381	0.404694	0.251522	0.999994	1	2.34716	2.57119	5.17188	2.1666	3.46365	2.26796
MMP23B	ENSG00000189409	0.127286	1.70674	0.77124	0.190094	0.999994	1	0.56249	0.215472	0.344635	0.209376	0.365362	0.0845376
CDK11B	ENSG00000248333	6.01031	1.03235	0.0459379	0.824971	0.999994	1	16.8743	21.1133	15.2943	18.0199	16.8963	17.0836
FO704657.1	ENSG00000272004	0.865822	-1.66781	-0.737954	0.177457	0.999994	1	1.97319	0.79186	1.8998	1.9786	2.94362	2.95142
SLC35E2B	ENSG00000189339	8.92281	1.04816	0.0678526	0.704045	0.999994	1	28.2883	26.1209	24.4087	24.6838	27.441	23.967
CDK11A	ENSG00000008128	1.24476	1.21173	0.27707	0.333558	0.999994	1	3.28172	3.38442	4.22427	3.28146	2.9127	2.95707
AL031282.2	ENSG00000268575	3.4399	1.08218	0.113936	0.622547	0.999994	1	10.8891	10.2276	9.28641	9.83002	10.2126	8.38011
SLC35E2A	ENSG00000215790	8.27623	1.09321	0.12857	0.489106	0.999994	1	25.8604	22.1553	24.7953	20.7189	24.8752	22.057
NADK	ENSG00000008130	11.3927	-1.10524	-0.144366	0.437449	0.999994	1	32.733	31.9019	27.9774	35.8658	34.0896	33.4102
GNB1	ENSG00000078369	81.2036	-1.09387	-0.129443	0.520375	0.999994	1	225.613	279	167.039	247.831	204.938	282.44
AL109917.1	ENSG00000231050	0.548866	-1.03022	-0.0429542	0.926823	0.999994	1	1.61788	1.57323	1.56569	1.81991	1.43641	1.71455
TMEM52	ENSG00000178821	0.956703	-1.10343	-0.14199	0.729019	0.999994	1	2.53696	3.16744	2.08978	3.62743	1.78167	3.22326
PRKCZ	ENSG00000067606	0.0103471	1.80285	0.850282	0.307619	0.999994	1	0.0439585	0.0137208	0.0329183	0	0.0402671	0.00807474
PRKCZ-AS1	ENSG00000182873	0.0391863	-1.26731	-0.341771	0.703403	0.999994	1	0.0975378	0.0304445	0.146082	0.0380354	0.214433	0.1075
FAAP20	ENSG00000162585	1.02434	-1.06763	-0.0944117	0.668083	0.999994	1	2.89218	3.12411	2.59897	3.23242	2.77042	3.27866
SKI	ENSG00000157933	13.8882	-1.11153	-0.152544	0.417667	0.999994	1	33.5076	39.6535	38.6728	43.7205	40.9198	41.3412
AL590822.3	ENSG00000287356	0.154476	-1.02818	-0.0400882	0.942511	0.999994	1	0.535161	0.537565	0.288544	0.52362	0.470612	0.407514
MORN1	ENSG00000116151	0.518305	-1.03903	-0.0552405	0.85103	0.999994	1	1.61617	1.51336	1.34954	1.76271	1.79293	1.15644
AL513477.2	ENSG00000272420	0.403301	1.11405	0.15582	0.77915	0.999994	1	1.48882	1.20824	0.891925	0.928921	1.41835	0.875143
RER1	ENSG00000157916	6.3029	1.01613	0.0230892	0.902854	0.999994	1	18.0953	19.3012	18.1754	18.3635	17.7667	19.2008
PEX10	ENSG00000157911	3.53582	1.06503	0.0909	0.690754	0.999994	1	12.1413	11.4387	7.88867	10.2176	10.5493	8.95376
PLCH2	ENSG00000149527	0.20651	1.05833	0.0817876	0.772009	0.999994	1	0.672829	0.669102	0.49213	0.390509	0.544661	0.804785
PANK4	ENSG00000157881	2.7198	1.16404	0.21914	0.323475	0.999994	1	9.05621	9.01988	6.12597	7.09329	7.12801	6.68264
PRXL2B	ENSG00000157870	1.2826	-1.32727	-0.408467	0.296534	0.999994	1	3.11068	3.99336	1.6832	4.40211	3.01491	4.18412
TTC34	ENSG00000215912	0.142534	-1.06938	-0.0967785	0.809404	0.999994	1	0.460532	0.317439	0.413843	0.516313	0.534354	0.246736
TPRG1L	ENSG00000158109	2.29856	1.03944	0.0558067	0.852787	0.999994	1	6.41019	6.46417	7.30063	6.15308	8.23355	5.3828
WRAP73	ENSG00000116213	1.43322	1.04961	0.0698536	0.763156	0.999994	1	4.01742	4.5917	4.04149	3.99141	3.35264	4.81844
TP73	ENSG00000078900	2.22374	-1.31096	-0.390622	0.203124	0.999994	1	5.93177	6.09273	3.35396	8.26488	4.26755	7.53849
LRRC47	ENSG00000130764	6.9949	-1.03788	-0.0536355	0.774758	0.999994	1	20.7928	21.8703	17.932	21.7212	22.375	19.4302
CEP104	ENSG00000116198	3.70095	1.03881	0.0549297	0.77244	0.999994	1	11.2095	11.0129	10.4335	9.61942	11.6447	10.5624
DFFB	ENSG00000169598	1.64707	-1.17839	-0.236813	0.413199	0.999994	1	3.59821	5.22451	3.74396	4.82295	5.18827	4.94512
C1orf174	ENSG00000198912	5.12197	1.03048	0.0433187	0.828534	0.999994	1	13.3233	18.5634	13.4735	14.0083	14.5748	15.8028
LINC01134	ENSG00000236423	0.0732028	1.0478	0.0673642	0.907084	0.999994	1	0.151847	0.142188	0.33493	0.226089	0.273134	0.121714
NPHP4	ENSG00000131697	0.77219	1.12263	0.166885	0.507174	0.999994	1	2.55616	1.94051	2.29702	1.95851	2.55094	1.64693
KCNAB2	ENSG00000069424	0.114401	1.26387	0.337843	0.440891	0.999994	1	0.260266	0.222386	0.502842	0.254999	0.40768	0.14701
RPL22	ENSG00000116251	67.7071	1.07321	0.101929	0.590722	0.999994	1	212.105	200.446	185.519	181.644	229.246	154.425
AL031847.1	ENSG00000226944	2.08101	-1.00367	-0.0052816	0.989446	0.999994	1	6.26409	5.58632	6.43318	6.97919	4.91833	6.73953
RNF207	ENSG00000158286	1.65675	-1.05815	-0.0815452	0.734781	0.999994	1	5.1205	4.45059	4.47079	5.19026	5.60041	4.26796
ICMT	ENSG00000116237	15.187	-1.31934	-0.399817	0.0601711	0.999994	1	35.1465	42.3508	26.5482	52.4672	33.0807	51.7076
GPR153	ENSG00000158292	0.0762205	-1.38408	-0.46893	0.3703	0.999994	1	0.147724	0.213778	0.132748	0.23566	0.280479	0.177614
ACOT7	ENSG00000097021	3.89289	-1.2158	-0.281906	0.324958	0.999994	1	11.0184	12.0456	6.00712	14.0255	7.94924	13.1834
AL031848.2	ENSG00000271746	0.49399	-1.31407	-0.394038	0.430647	0.999994	1	1.01034	1.45064	0.907909	1.49715	1.03655	1.93012
TNFRSF25	ENSG00000215788	0.0631182	1.39693	0.48226	0.427813	0.999994	1	0.171118	0.0739538	0.295712	0.13859	0.15916	0.101552
PLEKHG5	ENSG00000171680	0.267166	1.29568	0.373707	0.261431	0.999994	1	0.855284	0.763455	0.739843	0.710684	0.720491	0.414058
NOL9	ENSG00000162408	10.2249	-1.05418	-0.0761169	0.68366	0.999994	1	30.2393	33.6812	23.5574	31.9562	30.9727	29.8584
ZBTB48	ENSG00000204859	1.50111	1.03459	0.0490552	0.858013	0.999994	1	4.50015	4.19048	4.51571	4.62112	4.63065	3.70606
KLHL21	ENSG00000162413	3.0922	-1.09385	-0.129412	0.557753	0.999994	1	6.9358	9.76869	8.62586	9.4615	9.05184	9.53501
PHF13	ENSG00000116273	5.00245	-1.07015	-0.0978098	0.628462	0.999994	1	13.3491	16.3372	12.3306	16.1252	13.5476	15.6535
THAP3	ENSG00000041988	1.58324	1.05767	0.0808854	0.77585	0.999994	1	5.05342	4.30415	4.59087	3.70907	5.55487	4.11996
DNAJC11	ENSG00000007923	12.1387	-1.1176	-0.160404	0.390795	0.999994	1	30.0351	40.6913	27.1994	40.6386	32.9789	36.3667
CAMTA1	ENSG00000171735	4.27737	-1.05996	-0.0840109	0.682759	0.999994	1	12.5073	12.9271	10.8505	12.3275	13.1226	13.377
VAMP3	ENSG00000049245	15.182	-1.05138	-0.0722823	0.733919	0.999994	1	44.2887	51.7863	34.3118	46.5511	40.4297	50.563
PER3	ENSG00000049246	2.49942	1.15435	0.207087	0.459899	0.999994	1	6.05604	8.89079	7.11848	5.83881	7.22319	6.291
PARK7	ENSG00000116288	25.2303	-1.14512	-0.195498	0.33928	0.999994	1	72.676	84.0643	43.1583	84.7736	62.4364	81.136
ERRFI1	ENSG00000116285	2.71736	-1.04601	-0.0649028	0.832531	0.999994	1	6.70478	7.80681	8.66782	7.89105	9.77241	7.0625
RERE	ENSG00000142599	10.3987	-1.08029	-0.111413	0.542465	0.999994	1	30.909	28.6773	26.8097	31.6073	34.178	28.6944
ENO1	ENSG00000074800	112.601	-1.07392	-0.10288	0.708607	0.999994	1	330.857	455.644	169.603	388.399	253.967	375.658
ENO1-AS1	ENSG00000230679	0.60549	1.39277	0.477956	0.376369	0.999994	1	2.2254	2.08384	1.11099	1.30171	1.35901	1.22635
GPR157	ENSG00000180758	0.42752	-1.14205	-0.191626	0.658047	0.999994	1	0.8397	1.11474	1.37542	0.945033	2.10309	0.866893
MIR34AHG	ENSG00000228526	1.65092	1.45681	0.542812	0.177938	0.999994	1	3.49845	2.372	8.22038	2.70574	5.53338	1.92075
LNCTAM34A	ENSG00000234546	0.953593	1.07365	0.102521	0.807692	0.999994	1	2.79119	1.87393	3.62036	2.31037	4.05228	1.59619
H6PD	ENSG00000049239	4.49563	-1.03584	-0.0508047	0.796186	0.999994	1	13.7177	13.4681	11.7998	14.3921	13.9021	12.5124
SPSB1	ENSG00000171621	6.87127	-1.36806	-0.452136	0.054343	0.999994	1	16.9679	16.8077	11.5703	24.1511	16.6585	21.3595
BX323043.1	ENSG00000284652	0.0920755	-1.2301	-0.298772	0.638978	0.999994	1	0.159708	0.209368	0.287033	0.373673	0.175555	0.281632
LINC02606	ENSG00000284693	0.345813	-1.17954	-0.238221	0.594275	0.999994	1	1.16064	1.14719	0.366971	1.00577	0.968666	1.16074
SLC25A33	ENSG00000171612	6.9687	-1.09198	-0.126942	0.553269	0.999994	1	16.9641	20.966	19.2552	20.0164	22.7361	20.5617
TMEM201	ENSG00000188807	4.90277	-1.05313	-0.074686	0.68788	0.999994	1	14.8352	12.9311	13.9117	15.5318	16.2717	12.7457
PIK3CD	ENSG00000171608	0.247316	1.00104	0.0015057	0.99705	0.999994	1	0.890207	0.858589	0.463975	0.864382	0.743691	0.608302
PIK3CD-AS2	ENSG00000231789	0.997115	1.00293	0.0042195	0.99177	0.999994	1	4.08267	2.08014	2.64367	3.30118	2.83786	2.71304
CLSTN1	ENSG00000171603	14.474	1.25246	0.324763	0.148546	0.999994	1	48.6093	33.4505	45.0006	33.7484	49.1035	20.9814
CTNNBIP1	ENSG00000178585	2.19804	-1.0525	-0.0738217	0.781192	0.999994	1	7.04077	6.26089	5.47731	6.8936	6.92279	6.14094
LZIC	ENSG00000162441	9.36364	-1.0201	-0.0287137	0.879659	0.999994	1	28.3691	30.5778	23.702	26.9057	29.1294	28.9789
NMNAT1	ENSG00000173614	0.724979	1.12692	0.172384	0.674753	0.999994	1	1.99337	1.38561	2.90121	1.27329	2.68855	1.79262
RBP7	ENSG00000162444	21.6431	1.0764	0.106211	0.728687	0.999994	1	78.4174	64.4267	49.5446	59.6794	62.1148	58.0985
UBE4B	ENSG00000130939	13.8187	-1.13945	-0.188341	0.304519	0.999994	1	40.2334	39.5316	29.5675	42.6408	39.9252	42.7553
KIF1B	ENSG00000054523	24.2104	-1.09449	-0.130258	0.47857	0.999994	1	68.298	72.0927	58.6122	68.9235	75.841	75.0706
AL139424.2	ENSG00000284642	0.493157	-1.07723	-0.107323	0.835949	0.999994	1	0.916076	1.17948	1.95511	1.20565	1.63634	1.64067
PGD	ENSG00000142657	54.9783	-1.10099	-0.138808	0.490768	0.999994	1	162.077	161.825	125.779	176.529	170.183	152.327
CENPS-CORT	ENSG00000251503	0.433499	-1.24509	-0.316255	0.493868	0.999994	1	1.13055	1.48209	0.564409	0.617211	1.29797	2.02133
CENPS	ENSG00000175279	4.14621	-1.10382	-0.142501	0.639561	0.999994	1	13.3847	14.2849	6.46308	13.8849	11.203	12.4768
DFFA	ENSG00000160049	12.0017	1.0106	0.0152148	0.941422	0.999994	1	31.4944	35.8419	38.0438	35.0125	41.3078	29.8624
PEX14	ENSG00000142655	3.66156	-1.02179	-0.0310944	0.894428	0.999994	1	11.2869	11.4692	9.48604	10.8423	12.6182	9.83312
CASZ1	ENSG00000130940	7.86936	-1.11856	-0.161645	0.401259	0.999994	1	21.4099	22.749	19.0918	23.0104	22.9494	25.4219
AL139423.1	ENSG00000272078	0.0544	1.16409	0.219199	0.670339	0.999994	1	0.17789	0.126596	0.172644	0.149837	0.164255	0.101951
TARDBP	ENSG00000120948	23.0865	-1.14202	-0.191591	0.392453	0.999994	1	65.8302	74.1644	43.0759	75.8393	54.6521	78.3572
AL109811.2	ENSG00000271895	2.48437	1.00543	0.00781242	0.985197	0.999994	1	3.75845	6.9174	10.7728	6.36791	8.2628	7.35623
SRM	ENSG00000116649	42.1549	-1.11121	-0.152131	0.417546	0.999994	1	116.921	123.643	100.654	134.936	117.823	129.355
EXOSC10	ENSG00000171824	24.639	-1.0804	-0.11156	0.551671	0.999994	1	70.6616	78.6265	56.3439	73.7145	73.6184	76.2299
MTOR	ENSG00000198793	7.10778	-1.08111	-0.112516	0.551869	0.999994	1	19.1662	24.0451	16.1193	21.1693	19.2032	24.0357
UBIAD1	ENSG00000120942	3.63271	-1.0488	-0.0687448	0.73754	0.999994	1	10.0396	11.6966	9.40055	10.7327	12.3771	9.9157
DISP3	ENSG00000204624	0.0252468	-1.12387	-0.168475	0.795555	0.999994	1	0.0644833	0.0517556	0.0827799	0.0754369	0.0405039	0.111681
FBXO44	ENSG00000132879	0.476779	1.19496	0.256958	0.496721	0.999994	1	1.90214	1.42192	0.93365	1.53336	1.12451	0.916084
MAD2L2	ENSG00000116670	2.27089	-1.08979	-0.124056	0.663195	0.999994	1	7.34391	6.98794	4.51136	6.70645	6.15236	7.72016
DRAXIN	ENSG00000162490	0.0785975	1.07432	0.10342	0.831528	0.999994	1	0.191367	0.243704	0.25451	0.232829	0.244013	0.177167
AGTRAP	ENSG00000177674	4.23101	-1.0913	-0.126043	0.636145	0.999994	1	13.336	11.8156	9.73696	14.247	13.6922	10.4877
MTHFR	ENSG00000177000	0.881709	-1.09167	-0.126538	0.595717	0.999994	1	2.35806	2.33146	2.52926	2.87424	2.48339	2.63522
CLCN6	ENSG00000011021	3.64696	1.0404	0.0571432	0.767615	0.999994	1	10.2641	10.0957	11.641	10.0467	12.1015	9.1762
AL021155.5	ENSG00000285646	0.475606	1.09422	0.129899	0.770431	0.999994	1	0.532376	1.49554	2.07858	1.67514	0.6861	1.477
RNU5E-1	ENSG00000199347	4.55729	-1.2296	-0.298183	0.651115	0.999994	1	8.45652	11.438	13.0875	14.2899	9.81208	17.0872
KIAA2013	ENSG00000116685	8.26196	-1.05151	-0.0724675	0.764374	0.999994	1	19.64	25.0358	25.5391	24.9461	25.7064	24.3541
PLOD1	ENSG00000083444	6.96673	1.08886	0.122823	0.526424	0.999994	1	20.8128	22.178	18.6266	19.0422	19.6979	18.4303
MFN2	ENSG00000116688	14.0048	-1.11118	-0.152094	0.412607	0.999994	1	37.4334	47.0796	29.3495	45.4366	37.5091	43.9307
MIIP	ENSG00000116691	2.06102	1.01342	0.0192293	0.949195	0.999994	1	4.53653	6.17544	7.29121	6.03189	6.34868	5.74877
VPS13D	ENSG00000048707	1.57355	1.083	0.11504	0.54992	0.999994	1	4.72069	5.06606	4.13965	4.02364	4.05223	4.88572
LRRC38	ENSG00000162494	20.6028	-1.18248	-0.24182	0.499371	0.999994	1	50.7079	70.5418	36.7575	62.3637	47.8217	76.1786
PDPN	ENSG00000162493	24.6281	-1.06905	-0.0963317	0.632803	0.999994	1	75.3567	86.9686	46.5477	79.0658	64.8965	79.1146
PRDM2	ENSG00000116731	5.01348	1.05063	0.0712506	0.704084	0.999994	1	14.9007	15.7265	13.6776	14.2196	14.6829	13.7263
KAZN	ENSG00000189337	0.00311158	-1.38581	-0.470729	0.595003	0.999994	1	0	0.0076177	0.0109657	0.0190342	0.00447121	0.00448305
TMEM51-AS1	ENSG00000175147	0.0633017	-1.05794	-0.0812573	0.8605	0.999994	1	0.150677	0.136683	0.241184	0.242374	0.186332	0.145309
TMEM51	ENSG00000171729	5.04486	-1.32191	-0.402621	0.114059	0.999994	1	9.97552	11.747	12.3824	14.2928	15.3958	16.1029
FHAD1	ENSG00000142621	0.0105769	-1.0495	-0.0696971	0.919612	0.999994	1	0.0220136	0.0206133	0.0474764	0.0154518	0.0725939	0.00970482
EFHD2	ENSG00000142634	4.56368	-1.08737	-0.120841	0.623072	0.999994	1	13.3711	12.8331	11.4958	13.2219	15.2604	12.9959
CASP9	ENSG00000132906	0.890793	1.00995	0.0142776	0.96414	0.999994	1	2.63213	2.78531	2.45182	2.76631	2.34053	2.77126
DNAJC16	ENSG00000116138	5.08486	-1.01326	-0.0190074	0.922351	0.999994	1	16.4923	13.4643	14.8263	14.4723	19.4098	12.2921
DDI2	ENSG00000197312	6.1506	-1.11084	-0.151645	0.416051	0.999994	1	15.4761	19.3901	14.943	18.2403	18.1974	19.363
RSC1A1	ENSG00000215695	7.06454	-1.18174	-0.240912	0.335826	0.999994	1	16.4508	23.4341	14.1272	21.0951	18.1835	24.6999
PLEKHM2	ENSG00000116786	8.03927	1.04454	0.0628704	0.749243	0.999994	1	25.9655	22.973	22.0586	22.6705	24.5995	21.5233
FBLIM1	ENSG00000162458	0.311051	1.24219	0.312885	0.446444	0.999994	1	0.984748	1.01917	0.756834	0.864018	0.712147	0.671191
AL450998.2	ENSG00000179743	0.919672	-1.00103	-0.00149064	0.996878	0.999994	1	2.53046	2.02795	3.44161	2.29357	3.45815	2.46229
SPEN	ENSG00000065526	21.5327	1.01534	0.0219684	0.911073	0.999994	1	63.4412	66.9865	59.7296	59.5626	72.7181	57.4913
ZBTB17	ENSG00000116809	3.46933	1.04931	0.0694457	0.756448	0.999994	1	10.0122	11.3923	9.28392	10.2819	9.8072	9.48147
CLCNKB	ENSG00000184908	0.155424	-1.04777	-0.0673166	0.902734	0.999994	1	0.556287	0.377205	0.413702	0.381493	0.590401	0.443973
EPHA2	ENSG00000142627	18.1848	1.067	0.0935555	0.73736	0.999994	1	49.6241	33.8722	73.8816	45.2484	71.3542	36.0567
ARHGEF19	ENSG00000142632	0.533901	1.07967	0.110589	0.770741	0.999994	1	1.23529	1.92321	1.5514	1.35807	1.57054	1.49269
AL109627.1	ENSG00000288398	1.29394	1.0431	0.0608723	0.866006	0.999994	1	4.38392	3.13333	3.86335	3.27041	4.3999	3.40786
CPLANE2	ENSG00000132881	0.922748	1.25533	0.328068	0.438793	0.999994	1	3.79666	2.75021	1.70588	2.13699	2.67727	1.77642
FBXO42	ENSG00000037637	2.69576	-1.08578	-0.118733	0.561503	0.999994	1	6.99	8.3033	7.00115	8.03095	8.4953	7.95225
SZRD1	ENSG00000055070	15.3353	-1.04159	-0.0587886	0.752444	0.999994	1	44.1789	50.7646	37.6595	48.9296	43.3745	46.7258
NECAP2	ENSG00000157191	2.69086	-1.07059	-0.0984064	0.727153	0.999994	1	7.14175	9.54256	6.01316	8.57035	7.07437	8.72824
LINC01772	ENSG00000226029	0.092111	1.0443	0.0625374	0.906967	0.999994	1	0.208481	0.178952	0.405915	0.284545	0.324656	0.172332
RNU1-1	ENSG00000206652	23.7688	2.11277	1.07914	0.0323772	0.999994	1	39.1888	70.173	96.689	48.2586	10.9583	39.7816
AL137802.2	ENSG00000261135	0.826768	-1.04706	-0.0663393	0.899828	0.999994	1	1.82844	1.75969	3.37742	2.55495	3.12647	1.84726
LINC01783	ENSG00000233421	0.148519	2.15401	1.10702	0.0982704	0.999994	1	0.364191	0.40923	0.523631	0	0.40033	0.200695
NBPF1	ENSG00000219481	7.6029	-1.00374	-0.00538506	0.978886	0.999994	1	21.5083	20.8491	24.3433	21.4138	26.2864	20.5201
RNU1-3	ENSG00000207513	24.0436	2.00874	1.00629	0.0400746	0.999994	1	35.0636	65.9884	106.265	49.8672	17.76	37.8873
CROCC	ENSG00000058453	2.57676	1.12554	0.17062	0.367497	0.999994	1	7.84511	7.78626	7.12398	7.42393	6.91282	6.119
RNU1-4	ENSG00000207389	53.0562	-1.0107	-0.0153493	0.958661	0.999994	1	145.411	110.088	205.117	119.842	175.333	182.617
BX284668.2	ENSG00000228549	0.0183372	2.03431	1.02454	0.287141	0.999994	1	0.102721	0.0480936	0.0153845	0.0400567	0	0.0377377
RNU1-2	ENSG00000207005	55.9562	1.01092	0.0156674	0.959355	0.999994	1	157.786	115.238	213.148	115.418	191.581	186.784
MFAP2	ENSG00000117122	7.2659	-1.0099	-0.0142136	0.957278	0.999994	1	25.0079	21.782	17.6717	23.5409	17.6864	24.1713
ATP13A2	ENSG00000159363	4.20539	-1.07472	-0.103962	0.628996	0.999994	1	13.2651	12.7731	9.25849	14.1248	10.4288	13.5082
SDHB	ENSG00000117118	14.4315	-1.04338	-0.0612707	0.764503	0.999994	1	43.897	49.167	31.8948	43.6385	40.9532	46.2606
PADI2	ENSG00000117115	0.00123196	-4.05203	-2.01864	0.452991	0.999994	1	0	0	0	0.0109922	0	0
RCC2	ENSG00000179051	62.6509	-1.12678	-0.172212	0.388022	0.999994	1	169.448	198.052	134.298	202.759	166.375	198.394
ARHGEF10L	ENSG00000074964	0.201974	1.07585	0.105479	0.794745	0.999994	1	0.687522	0.650426	0.458589	0.563846	0.490844	0.624945
ACTL8	ENSG00000117148	0.532092	-1.07103	-0.0990048	0.816986	0.999994	1	1.68152	1.25965	1.51105	1.71679	2.01641	1.11196
ALDH4A1	ENSG00000159423	2.01975	-1.08263	-0.114535	0.681373	0.999994	1	6.0692	6.07558	4.65883	6.24668	6.43256	5.66265
IFFO2	ENSG00000169991	0.101622	-1.448	-0.534061	0.208835	0.999994	1	0.228098	0.222133	0.180377	0.277519	0.260762	0.382123
AL137127.1	ENSG00000272084	0.127921	-1.25372	-0.326213	0.573743	0.999994	1	0.39772	0.217246	0.297833	0.40712	0.255025	0.493136
UBR4	ENSG00000127481	10.8211	-1.00132	-0.00190197	0.992227	0.999994	1	32.5377	31.6796	31.1741	29.9533	36.7313	30.2323
EMC1	ENSG00000127463	9.85973	1.02768	0.0393933	0.837823	0.999994	1	30.2786	30.1944	26.6761	29.666	28.9331	27.0943
MRTO4	ENSG00000053372	16.4901	-1.03665	-0.0519305	0.784885	0.999994	1	46.1866	56.054	40.9889	55.9933	44.4901	48.9108
AKR7L	ENSG00000211454	0.110798	-1.00383	-0.0055185	0.992712	0.999994	1	0.203673	0.381436	0.384352	0.40506	0.179107	0.404058
AKR7A3	ENSG00000162482	0.200088	-1.35224	-0.435347	0.539651	0.999994	1	0.371205	0.173797	0.750538	0.271413	0.30603	1.22736
AKR7A2	ENSG00000053371	6.64034	-1.04531	-0.0639343	0.812419	0.999994	1	24.5007	22.1419	11.0653	22.6263	16.2148	21.2467
SLC66A1	ENSG00000040487	1.75871	1.03264	0.0463392	0.879773	0.999994	1	5.20531	5.03143	5.24343	5.35288	4.84509	4.99672
CAPZB	ENSG00000077549	29.1339	-1.08634	-0.119474	0.568607	0.999994	1	91.8147	99.1109	52.3662	95.7637	73.642	94.3441
MICOS10	ENSG00000173436	2.31027	-1.1072	-0.146922	0.597018	0.999994	1	6.31667	7.514	5.00142	7.49798	5.91439	7.50611
NBL1	ENSG00000158747	1.45684	1.03912	0.0553558	0.889567	0.999994	1	4.53084	4.96197	3.45162	5.17209	3.53283	3.80137
OTUD3	ENSG00000169914	2.86574	-1.09831	-0.135291	0.519746	0.999994	1	6.46061	8.85596	8.04989	8.20945	9.72994	8.11322
MUL1	ENSG00000090432	4.20347	-1.07752	-0.10772	0.651033	0.999994	1	12.3063	12.8715	9.93195	13.283	13.4254	11.4648
PINK1	ENSG00000158828	0.908169	1.05008	0.0705042	0.813224	0.999994	1	2.65961	3.03658	2.34805	2.5246	2.46191	2.75128
PINK1-AS	ENSG00000117242	1.92043	1.01406	0.0201411	0.946182	0.999994	1	5.40548	5.59631	5.88369	5.78929	5.59315	5.51007
DDOST	ENSG00000244038	33.691	1.05027	0.0707554	0.714709	0.999994	1	115.634	86.6264	94.8433	92.1796	117.406	77.8916
KIF17	ENSG00000117245	1.02126	1.0344	0.048794	0.887485	0.999994	1	2.97649	3.10603	2.92408	3.29029	3.5214	2.02947
SH2D5	ENSG00000189410	0.0496465	-1.0155	-0.0221956	0.966162	0.999994	1	0.226161	0.152948	0.0677441	0.146988	0.165735	0.138478
HP1BP3	ENSG00000127483	22.7905	-1.08815	-0.121883	0.517808	0.999994	1	64.6711	74.1366	50.2438	71.2371	60.5394	74.6847
EIF4G3	ENSG00000075151	13.5368	1.04118	0.0582151	0.750922	0.999994	1	42.2885	43.2789	34.3849	39.0387	36.2617	40.7349
ECE1	ENSG00000117298	2.90464	-1.13746	-0.185821	0.443615	0.999994	1	8.69413	9.43413	5.03979	9.24141	5.9444	11.053
NBPF3	ENSG00000142794	0.888476	1.05067	0.0713157	0.839489	0.999994	1	2.7725	3.16961	1.97082	2.82713	1.76488	2.9371
ALPL	ENSG00000162551	0.187603	-1.26789	-0.342435	0.554951	0.999994	1	0.681062	0.42516	0.238006	0.5533	0.4783	0.667223
RAP1GAP	ENSG00000076864	0.445892	-1.53298	-0.61634	0.179089	0.999994	1	1.17554	1.09159	0.387332	1.45544	0.796847	1.77066
USP48	ENSG00000090686	11.1705	1.01437	0.0205835	0.910658	0.999994	1	34.9409	37.3709	26.8803	32.369	32.3591	33.6617
HSPG2	ENSG00000142798	1.93493	-1.00128	-0.00185156	0.992713	0.999994	1	7.12256	4.83094	5.14498	6.00635	6.90239	4.45488
LINC00339	ENSG00000218510	1.82097	1.0348	0.0493511	0.846723	0.999994	1	5.66165	5.56799	4.87232	5.09894	5.38377	5.23295
CDC42	ENSG00000070831	15.5758	-1.10259	-0.140894	0.499949	0.999994	1	45.5157	54.383	28.2593	50.8284	37.2481	52.8443
ZBTB40	ENSG00000184677	5.51633	-1.04214	-0.0595437	0.739651	0.999994	1	15.181	16.9156	15.3769	16.4865	16.9983	16.5892
EPHA8	ENSG00000070886	1.24176	1.13872	0.187413	0.463565	0.999994	1	3.49632	3.34192	4.04619	3.53192	3.95729	2.26403
EPHB2	ENSG00000133216	0.00492897	1.39291	0.4781	0.577724	0.999994	1	0.00900876	0.00421786	0.0283341	0.0210781	0.00495134	0.00496446
KDM1A	ENSG00000004487	42.5382	-1.06662	-0.0930417	0.668363	0.999994	1	130.05	145.844	85.1836	142.43	106.023	136.572
LUZP1	ENSG00000169641	1.64373	-1.08372	-0.115993	0.569502	0.999994	1	4.49474	5.40041	3.78203	4.49341	4.4595	5.94459
LINC01355	ENSG00000261326	1.69447	-1.00762	-0.0109446	0.972832	0.999994	1	4.1129	3.93667	6.65432	4.11808	6.72639	4.42243
HNRNPR	ENSG00000125944	29.9991	-1.06942	-0.0968274	0.641841	0.999994	1	93.8249	102.436	57.9137	101.066	71.9781	98.3663
ZNF436	ENSG00000125945	5.27752	-1.22502	-0.292811	0.221322	0.999994	1	10.2835	17.6594	10.9452	14.938	13.039	19.7986
ZNF436-AS1	ENSG00000249087	1.42982	1.13299	0.180129	0.591107	0.999994	1	3.94258	3.90896	4.67963	3.79836	4.26427	3.20668
AL109936.2	ENSG00000271420	3.43132	-1.29734	-0.375562	0.335893	0.999994	1	8.67336	7.3907	7.63817	10.4511	8.86662	11.7579
TCEA3	ENSG00000204219	41.1915	-1.05295	-0.0744321	0.704193	0.999994	1	128.938	115.723	106.575	126.774	143.334	104.472
ASAP3	ENSG00000088280	2.56792	1.1614	0.215859	0.508403	0.999994	1	9.47149	8.33983	5.11895	6.86243	7.10654	5.8423
E2F2	ENSG00000007968	5.47401	-1.25791	-0.331026	0.301961	0.999994	1	12.3034	15.8701	11.0654	17.4	13.025	19.1001
ID3	ENSG00000117318	13.191	-1.42191	-0.50783	0.251287	0.999994	1	26.8694	46.2271	11.9542	43.6015	21.6236	53.7037
RPL11	ENSG00000142676	228.299	1.04302	0.0607605	0.753119	0.999994	1	715.704	645.659	651.605	651.497	789.985	519.234
ELOA-AS1	ENSG00000236810	1.00103	1.12804	0.173812	0.58376	0.999994	1	2.8499	3.19892	2.7908	2.24404	2.91179	2.75843
ELOA	ENSG00000011007	12.2963	-1.08246	-0.114316	0.537968	0.999994	1	34.3741	40.2369	27.8257	39.3445	35.1755	36.9745
PITHD1	ENSG00000057757	13.4882	-1.08741	-0.120895	0.533291	0.999994	1	37.0484	41.5912	32.896	41.8848	43.0346	37.5727
LYPLA2	ENSG00000011009	4.9703	-1.0255	-0.0363244	0.885052	0.999994	1	14.3662	18.4676	10.9545	17.1002	11.6521	16.2025
GALE	ENSG00000117308	1.33691	-1.20746	-0.271974	0.438883	0.999994	1	3.49237	4.85861	1.74208	4.50251	2.55405	5.01166
HMGCL	ENSG00000117305	1.35525	1.05626	0.0789715	0.792117	0.999994	1	4.48771	4.30542	3.2406	3.43361	4.00808	4.02973
FUCA1	ENSG00000179163	2.08505	1.10787	0.147787	0.691107	0.999994	1	7.90432	7.42732	3.39062	6.83054	3.60261	6.34404
PNRC2	ENSG00000189266	38.4613	1.03835	0.0542944	0.77665	0.999994	1	118.14	130.611	92.7782	109.946	105.057	115.725
SRSF10	ENSG00000188529	12.5067	-1.04956	-0.0697793	0.730165	0.999994	1	37.9046	44.1109	25.8774	38.7156	29.5381	44.8934
IFNLR1	ENSG00000185436	0.388358	-1.18882	-0.249536	0.472934	0.999994	1	1.03852	1.00452	0.881958	1.45525	0.991034	1.06913
STPG1	ENSG00000001460	0.997064	1.19427	0.256128	0.346816	0.999994	1	3.05366	2.78499	2.94051	2.68897	2.59942	2.16827
NIPAL3	ENSG00000001461	1.19437	1.33075	0.412236	0.0794492	0.999994	1	3.44405	2.98338	4.02228	2.29531	3.39667	2.33437
RCAN3	ENSG00000117602	0.00889134	-1.4853	-0.570752	0.485905	0.999994	1	0.0236944	0.0147915	0.0141948	0.0277193	0.00868184	0.0435242
SRRM1	ENSG00000133226	33.6121	-1.02702	-0.038461	0.84297	0.999994	1	97.7165	113.611	83.4997	103.301	103.306	98.4813
CLIC4	ENSG00000169504	72.8125	1.16326	0.21817	0.272084	0.999994	1	242.634	231.312	172.75	196.251	184.442	178.713
SYF2	ENSG00000117614	12.6533	1.08409	0.11648	0.561141	0.999994	1	36.5486	35.9587	38.7378	30.5032	46.6795	27.4857
AL031432.4	ENSG00000284602	0.904289	1.04157	0.0587628	0.883755	0.999994	1	2.96043	2.60338	2.42897	3.01157	2.88632	1.87257
RSRP1	ENSG00000117616	3.07727	1.4348	0.520849	0.0683259	0.999994	1	6.80208	6.07917	13.6176	5.73294	7.82695	5.56723
TMEM50A	ENSG00000183726	11.9118	-1.13634	-0.184398	0.370189	0.999994	1	32.5712	38.3566	23.8327	39.7473	27.2178	40.7491
RHCE	ENSG00000188672	0.17495	-1.06981	-0.0973549	0.838641	0.999994	1	0.53295	0.520747	0.416451	0.433725	0.382065	0.766155
MACO1	ENSG00000204178	24.6668	-1.24702	-0.318486	0.086635	0.999994	1	64.3537	65.5937	48.4204	74.0421	67.5311	81.9828
LDLRAP1	ENSG00000157978	1.22379	-1.24059	-0.311025	0.247089	0.999994	1	3.06067	3.72675	2.13084	4.03272	2.64097	4.38642
SELENON	ENSG00000162430	14.5047	1.06124	0.0857505	0.677354	0.999994	1	52.4619	50.0682	27.2386	45.4408	31.6513	44.8199
AL020996.1	ENSG00000228172	0.136822	1.37139	0.45564	0.357127	0.999994	1	0.524811	0.321318	0.362773	0.212524	0.355008	0.311454
MTFR1L	ENSG00000117640	3.56996	-1.09417	-0.129835	0.529758	0.999994	1	10.2892	10.6365	8.43336	11.343	10.626	10.4184
AUNIP	ENSG00000127423	6.85753	-1.0785	-0.109026	0.618054	0.999994	1	18.1679	20.3665	18.4931	20.0216	23.0332	19.2753
PAQR7	ENSG00000182749	1.49749	1.37388	0.458255	0.173711	0.999994	1	4.25776	3.6827	5.14757	3.12063	4.17275	2.44998
STMN1	ENSG00000117632	85.0421	-1.09879	-0.135909	0.657738	0.999994	1	264.313	323.42	118.742	272.302	161.281	334.099
PAFAH2	ENSG00000158006	1.48028	1.11046	0.151161	0.590066	0.999994	1	5.36285	4.95217	2.91019	4.27524	3.4129	4.22421
EXTL1	ENSG00000158008	0.0331661	1.51187	0.596338	0.357409	0.999994	1	0.0868863	0.104605	0.100386	0.0435623	0.0955079	0.0547205
PDIK1L	ENSG00000175087	5.19565	-1.01366	-0.0195794	0.927474	0.999994	1	13.5255	16.1382	16.0205	15.3891	17.9254	13.7624
ZNF593	ENSG00000142684	13.9452	1.12298	0.167326	0.604513	0.999994	1	38.2777	42.045	42.3562	35.5896	44.1078	31.4071
CNKSR1	ENSG00000142675	0.0479195	1.06196	0.0867338	0.891483	0.999994	1	0.199312	0.0666549	0.153519	0.149894	0.140843	0.109835
CEP85	ENSG00000130695	5.68355	1.02733	0.0388964	0.843557	0.999994	1	15.7789	18.5614	15.8532	17.344	14.1046	17.8495
SH3BGRL3	ENSG00000142669	21.339	-1.12009	-0.163616	0.506585	0.999994	1	74.2681	63.6984	34.9309	69.492	50.9351	72.6329
UBXN11	ENSG00000158062	1.29603	-1.0027	-0.00389349	0.989541	0.999994	1	4.2786	3.89421	3.30634	4.16415	4.57142	2.90598
DHDDS	ENSG00000117682	5.23155	-1.09218	-0.127211	0.520618	0.999994	1	13.6217	16.6901	12.7918	15.818	14.3104	17.2844
HMGN2	ENSG00000198830	136.635	-1.20678	-0.271168	0.35691	0.999994	1	397.183	476.076	161.389	456.979	248.331	527.574
RPS6KA1	ENSG00000117676	2.93659	-1.10379	-0.142467	0.575064	0.999994	1	8.08668	9.52816	6.39724	9.42671	6.51938	10.6023
AL512408.1	ENSG00000260063	0.501581	-1.16828	-0.224387	0.594491	0.999994	1	1.55036	1.1614	1.13988	1.68181	1.17745	1.67765
ARID1A	ENSG00000117713	17.543	-1.02007	-0.0286706	0.877403	0.999994	1	53.4446	51.7441	49.0848	49.7743	60.5363	49.2161
PIGV	ENSG00000060642	1.24954	1.26502	0.339161	0.30463	0.999994	1	4.25077	3.23113	3.53521	3.0227	2.6203	3.16004
ZDHHC18	ENSG00000204160	3.90736	1.13667	0.184809	0.451488	0.999994	1	9.65427	9.83299	14.5303	10.0863	12.8028	7.84086
GPN2	ENSG00000142751	2.80659	1.036	0.0510215	0.816698	0.999994	1	7.43593	8.58938	8.65099	7.13189	9.52152	7.55731
GPATCH3	ENSG00000198746	3.7334	-1.07023	-0.0979258	0.711726	0.999994	1	11.1943	11.2174	8.96701	11.9403	11.9432	10.0209
NUDC	ENSG00000090273	18.5616	-1.06044	-0.0846632	0.689994	0.999994	1	52.2594	66.6371	39.4013	62.7576	48.9153	56.4409
TENT5B	ENSG00000158246	0.708759	-1.14523	-0.195635	0.647207	0.999994	1	2.0591	1.37407	2.0843	2.40888	2.49757	1.53903
SLC9A1	ENSG00000090020	1.66338	-1.03108	-0.0441495	0.839165	0.999994	1	4.50469	4.61013	5.28284	5.35505	4.74161	4.98485
WDTC1	ENSG00000142784	7.13175	-1.03992	-0.0564767	0.762613	0.999994	1	23.1859	20.3179	18.1527	21.7241	20.4753	22.4742
TMEM222	ENSG00000186501	3.09331	-1.11342	-0.155001	0.495414	0.999994	1	7.78393	8.45642	8.61333	9.56294	10.6054	7.9543
SYTL1	ENSG00000142765	1.47654	1.34956	0.432485	0.205966	0.999994	1	5.11874	3.05362	4.76311	2.77562	4.63895	2.40351
MAP3K6	ENSG00000142733	0.706413	-1.03808	-0.0539114	0.891201	0.999994	1	2.34495	2.66434	1.18145	2.15789	1.45598	2.76829
GPR3	ENSG00000181773	0.336092	1.0434	0.0612957	0.89614	0.999994	1	0.791439	1.01283	1.13792	0.95674	1.01497	0.901352
WASF2	ENSG00000158195	22.9964	-1.06246	-0.087413	0.632346	0.999994	1	69.5059	73.8103	51.9365	70.5275	71.3741	66.8601
AHDC1	ENSG00000126705	0.796175	-1.01508	-0.0215943	0.938939	0.999994	1	2.28307	2.69139	2.07603	2.62319	1.94196	2.63608
IFI6	ENSG00000126709	0.997111	1.25793	0.331047	0.526793	0.999994	1	5.1556	2.63326	1.20336	2.81986	1.98719	2.28764
FAM76A	ENSG00000009780	3.83968	-1.01958	-0.0279751	0.911008	0.999994	1	10.3558	12.3798	11.039	11.7715	11.2912	11.7678
STX12	ENSG00000117758	5.5377	-1.03744	-0.0530249	0.80377	0.999994	1	15.8555	13.4025	18.2866	15.3388	21.5537	13.5681
PPP1R8	ENSG00000117751	23.6432	-1.06332	-0.0885802	0.633099	0.999994	1	62.1247	76.4012	61.3155	73.521	68.5974	72.3107
SCARNA1	ENSG00000252947	2.1539	-1.42335	-0.509291	0.325468	0.999994	1	5.43391	3.18016	4.88302	7.15157	5.22647	7.11185
RPA2	ENSG00000117748	27.0055	-1.02755	-0.0392153	0.83986	0.999994	1	78.9162	100.598	58.2311	87.96	75.2662	81.5504
SMPDL3B	ENSG00000130768	0.572901	1.06618	0.0924498	0.80272	0.999994	1	1.67246	1.74449	1.63608	1.51076	1.65225	1.63329
XKR8	ENSG00000158156	3.58784	1.10781	0.147717	0.664324	0.999994	1	9.70101	9.1994	12.4483	7.47776	13.578	7.97359
EYA3	ENSG00000158161	8.23393	-1.01194	-0.0171217	0.92644	0.999994	1	24.09	27.3075	21.5058	24.291	24.0495	26.038
DNAJC8	ENSG00000126698	41.1645	-1.13287	-0.179985	0.383149	0.999994	1	115.19	142.546	72.0505	134.119	93.4922	144.617
ATP5IF1	ENSG00000130770	13.5566	-1.08937	-0.123494	0.559075	0.999994	1	45.5322	43.2765	24.0214	45.1743	35.3444	42.2519
AL353622.1	ENSG00000270605	0.503374	1.08376	0.116041	0.790365	0.999994	1	1.10145	1.13995	2.1098	1.52591	1.75239	0.862544
SESN2	ENSG00000130766	8.97625	1.71322	0.776706	0.156791	0.999994	1	29.5726	11.406	36.6131	11.8114	24.5235	10.7328
MED18	ENSG00000130772	3.07791	-1.1184	-0.161435	0.634947	0.999994	1	8.3573	9.65779	6.80675	9.12295	7.65036	11.0901
PHACTR4	ENSG00000204138	8.84585	-1.01438	-0.0205912	0.908847	0.999994	1	25.3646	27.1926	25.4449	24.8598	28.6098	26.6815
RCC1	ENSG00000180198	19.2681	-1.18324	-0.242748	0.188891	0.999994	1	46.2847	58.2897	42.0875	58.3708	59.5323	57.0052
SNHG3	ENSG00000242125	18.0502	1.06407	0.0895993	0.644239	0.999994	1	54.4599	55.1281	49.831	52.4174	54.4369	44.7926
SNORA73A	ENSG00000274266	15.6115	1.14303	0.192859	0.672798	0.999994	1	38.3143	26.3953	69.5978	33.9372	52.6453	35.2903
SNORA73B	ENSG00000200087	80.8299	1.23313	0.302329	0.214086	0.999994	1	229.1	172.864	301.236	180.725	229.657	174.831
TRNAU1AP	ENSG00000180098	3.92694	1.01364	0.0195522	0.928762	0.999994	1	11.9789	12.564	10.2239	10.7245	12.3626	11.5449
SNHG12	ENSG00000197989	6.12153	1.17607	0.233974	0.309173	0.999994	1	14.2594	16.4708	22.5993	15.6921	18.5506	12.2493
TAF12	ENSG00000120656	10.6398	-1.08595	-0.118956	0.597043	0.999994	1	29.1654	30.6082	28.1379	28.3625	36.5674	31.8253
RAB42	ENSG00000188060	0.26272	1.42856	0.514561	0.323667	0.999994	1	0.563768	0.863848	0.875059	0.629555	0.450698	0.564865
AL360012.1	ENSG00000270103	5.64258	-2.59493	-1.3757	0.376888	0.999994	1	19.7964	0	0	50.3461	0	0
RNU11	ENSG00000274978	19.3454	1.37536	0.459805	0.367991	0.999994	1	13.8838	82.3377	72.5893	25.5938	36.9976	62.1351
GMEB1	ENSG00000162419	3.24957	1.00513	0.00737887	0.975817	0.999994	1	9.59253	9.72611	9.33379	9.42483	10.8994	8.5906
YTHDF2	ENSG00000198492	32.9608	-1.12677	-0.172198	0.462305	0.999994	1	82.1236	109.786	72.0725	104.404	91.0038	103.325
OPRD1	ENSG00000116329	5.5452	1.138	0.186497	0.560235	0.999994	1	17.9658	12.8404	17.8033	11.8991	20.4647	11.3831
EPB41	ENSG00000159023	6.47097	1.08238	0.114205	0.561314	0.999994	1	23.0042	21.665	13.098	20.3076	17.4323	15.7412
SRSF4	ENSG00000116350	9.01863	-1.07695	-0.106954	0.570537	0.999994	1	25.0642	27.8161	22.4311	27.382	27.8187	26.6646
MECR	ENSG00000116353	2.81481	1.00325	0.00468505	0.985654	0.999994	1	9.71403	9.2237	6.13372	8.68646	8.29675	8.1085
PTPRU	ENSG00000060656	1.72956	1.07017	0.097843	0.676309	0.999994	1	5.58537	6.17814	3.66199	5.6162	4.14562	4.66804
SDC3	ENSG00000162512	1.07768	1.19167	0.252983	0.511785	0.999994	1	4.53249	3.7809	1.40547	3.68741	2.14903	2.25146
PUM1	ENSG00000134644	19.9038	-1.01504	-0.0215355	0.905226	0.999994	1	58.8121	61.8483	55.1222	56.5699	67.0253	57.0487
NKAIN1	ENSG00000084628	0.949605	1.61413	0.690758	0.0597903	0.999994	1	2.51318	2.76674	3.05189	1.50978	2.42658	1.32879
SNRNP40	ENSG00000060688	9.08304	-1.08124	-0.112686	0.592402	0.999994	1	24.8162	33.0977	18.1687	29.2523	21.1406	31.7629
ZCCHC17	ENSG00000121766	8.51216	-1.18197	-0.241196	0.388303	0.999994	1	24.0651	27.6182	13.7136	27.7066	17.388	31.7953
FABP3	ENSG00000121769	0.0416427	-2.23612	-1.161	0.236485	0.999994	1	0.161307	0	0	0.283062	0	0.0888915
LINC01226	ENSG00000284543	0.0742008	-1.30819	-0.38757	0.493256	0.999994	1	0.314858	0.0911293	0.108031	0.167428	0.32093	0.189283
PEF1	ENSG00000162517	8.56611	-1.09413	-0.129782	0.519349	0.999994	1	24.5999	27.3809	18.6419	26.5238	25.5355	25.659
COL16A1	ENSG00000084636	0.0630804	-1.25097	-0.323051	0.387251	0.999994	1	0.207156	0.114105	0.131403	0.199578	0.100461	0.268605
ADGRB2	ENSG00000121753	0.135088	1.06183	0.0865548	0.777987	0.999994	1	0.566967	0.333515	0.300467	0.416673	0.391514	0.328461
SPOCD1	ENSG00000134668	0.180653	-1.58641	-0.665769	0.256325	0.999994	1	0.509261	0.186276	0.321773	0.586459	0.900919	0.166629
PTP4A2	ENSG00000184007	16.2087	-1.08563	-0.118529	0.527106	0.999994	1	41.9212	54.829	37.8525	50.753	43.8453	52.2702
KHDRBS1	ENSG00000121774	98.1918	-1.02825	-0.0401921	0.836818	0.999994	1	327.285	311.486	223.03	304.309	297.492	289.269
TMEM39B	ENSG00000121775	2.40745	1.12014	0.163674	0.566812	0.999994	1	6.71586	7.21681	7.25291	5.84517	7.04873	6.28709
KPNA6	ENSG00000025800	21.5402	-1.09032	-0.124751	0.494093	0.999994	1	62.168	67.1759	48.7387	66.484	65.0376	63.9433
TXLNA	ENSG00000084652	15.7922	1.00853	0.0122516	0.949005	0.999994	1	44.4819	52.7391	42.4588	49.536	44.4243	45.7569
CCDC28B	ENSG00000160050	0.375283	-1.0158	-0.0226115	0.959899	0.999994	1	1.74052	1.1802	0.449444	1.31064	1.07757	1.01427
IQCC	ENSG00000160051	1.74086	-1.19185	-0.253204	0.444408	0.999994	1	4.84595	5.1342	3.20978	5.82881	4.67659	5.26569
TMEM234	ENSG00000160055	1.05209	1.04828	0.0680223	0.842655	0.999994	1	3.80476	2.60184	2.87993	2.88119	3.54021	2.55779
EIF3I	ENSG00000084623	78.2501	-1.04963	-0.0698794	0.711059	0.999994	1	254.856	248.713	169.664	249.629	237.681	222.786
HDAC1	ENSG00000116478	8.73476	1.05776	0.0810126	0.671515	0.999994	1	23.5543	30.8811	22.9164	24.1629	22.0477	27.4172
MARCKSL1	ENSG00000175130	87.4146	-1.14648	-0.197211	0.452988	0.999994	1	241.771	320.33	132.388	293.42	156.21	339.01
TSSK3	ENSG00000162526	0.186257	1.27059	0.345493	0.521159	0.999994	1	0.426866	0.542468	0.657583	0.677725	0.16758	0.470466
FAM229A	ENSG00000225828	1.74851	-1.0045	-0.00648158	0.986713	0.999994	1	3.24984	3.58123	8.17348	3.80188	7.3189	4.56459
BSDC1	ENSG00000160058	4.52663	1.14766	0.198697	0.324511	0.999994	1	13.1345	12.3748	14.2346	10.9274	13.2124	11.0973
AL033529.1	ENSG00000254553	0.4072	-1.17238	-0.229441	0.660927	0.999994	1	1.01403	1.59276	0.558494	1.09061	1.34837	1.26181
ZBTB8B	ENSG00000273274	0.169279	1.36314	0.446935	0.312874	0.999994	1	0.588769	0.59246	0.331662	0.421493	0.183532	0.498786
ZBTB8A	ENSG00000160062	2.10895	-1.04089	-0.0578209	0.79984	0.999994	1	6.51635	5.01277	6.55726	5.62891	7.56577	5.99665
ZBTB8OS	ENSG00000176261	2.9287	-1.11212	-0.153312	0.526359	0.999994	1	8.70161	7.78928	7.15944	9.22712	7.17818	10.1007
RBBP4	ENSG00000162521	38.0725	-1.1119	-0.153021	0.423654	0.999994	1	104.282	117.717	86.5897	120.004	101.451	123.457
SYNC	ENSG00000162520	0.558233	-1.09571	-0.13187	0.739494	0.999994	1	2.12057	1.47508	1.00724	2.21498	1.34864	1.48577
KIAA1522	ENSG00000162522	9.59529	-1.18725	-0.247629	0.238444	0.999994	1	29.5744	26.8513	16.73	29.1751	28.5149	29.3645
YARS	ENSG00000134684	16.4787	1.1133	0.154847	0.489057	0.999994	1	55.9512	46.2722	43.5051	47.0074	42.8484	42.3188
S100PBP	ENSG00000116497	5.0495	1.0202	0.0288491	0.886847	0.999994	1	17.14	17.3767	10.5292	14.9059	12.1649	17.0787
FNDC5	ENSG00000160097	0.272574	1.44999	0.536042	0.224076	0.999994	1	0.898787	1.08915	0.459262	0.804058	0.29058	0.582699
HPCA	ENSG00000121905	1.98178	1.39543	0.480712	0.210937	0.999994	1	3.9326	4.5157	8.64131	2.3171	5.9005	4.46082
TMEM54	ENSG00000121900	5.0843	-1.35047	-0.433456	0.190715	0.999994	1	15.5563	12.8903	5.82766	17.0818	10.0151	18.8116
RNF19B	ENSG00000116514	7.96362	1.09267	0.12786	0.552132	0.999994	1	24.0844	19.2352	26.3982	19.6091	27.424	18.1882
AK2	ENSG00000004455	13.316	-1.02783	-0.0396057	0.826974	0.999994	1	40.5562	42.3971	33.6233	41.6414	39.3975	39.76
AZIN2	ENSG00000142920	0.111385	1.03785	0.0536028	0.898498	0.999994	1	0.282443	0.281007	0.407152	0.392375	0.291065	0.27238
TRIM62	ENSG00000116525	0.479647	-1.27789	-0.353761	0.360898	0.999994	1	1.21942	1.4074	0.764507	1.7749	1.05987	1.50024
ZNF362	ENSG00000160094	18.8375	-1.06117	-0.085661	0.644158	0.999994	1	54.9108	57.7515	47.0084	58.021	55.653	57.2143
PHC2	ENSG00000134686	23.6261	1.08884	0.122786	0.496434	0.999994	1	72.4003	71.7105	64.6224	65.3038	66.9038	61.6481
ZSCAN20	ENSG00000121903	1.06726	1.09807	0.134964	0.643175	0.999994	1	3.13323	2.96376	3.28325	2.55961	3.50251	2.61043
SMIM12	ENSG00000163866	1.532	-1.17594	-0.23381	0.304992	0.999994	1	3.82863	4.78523	3.14152	4.67677	3.83684	5.35575
DLGAP3	ENSG00000116544	0.0212853	1.31102	0.390685	0.603296	0.999994	1	0.0418433	0.0261211	0.112804	0.032634	0.0306635	0.0768619
AC114490.3	ENSG00000284773	0.221372	-1.535	-0.618243	0.211703	0.999994	1	0.249534	0.450632	0.576607	0.583843	0.822884	0.608975
AC114490.2	ENSG00000271741	1.65992	-1.07075	-0.0986212	0.765783	0.999994	1	5.22109	5.1956	3.58013	5.06515	4.41936	5.55387
TMEM35B	ENSG00000243749	2.084	1.0523	0.0735457	0.857039	0.999994	1	7.33755	3.77894	7.08819	6.86716	5.44431	5.32394
ZMYM6	ENSG00000163867	1.42658	1.10626	0.145685	0.506927	0.999994	1	4.7727	4.56843	3.33577	3.66025	4.22942	3.64966
ZMYM1	ENSG00000197056	7.02321	-1.08848	-0.122313	0.555651	0.999994	1	19.7671	23.9358	14.6387	21.1355	18.4782	24.0065
SFPQ	ENSG00000116560	45.9181	-1.18307	-0.242538	0.336067	0.999994	1	107.966	167.331	77.286	157.785	93.938	163.022
ZMYM4	ENSG00000146463	20.0094	-1.00676	-0.00972646	0.958862	0.999994	1	61.2906	69.7265	46.8609	59.6876	57.2516	62.9605
KIAA0319L	ENSG00000142687	3.28504	1.00903	0.0129669	0.947242	0.999994	1	11.8685	9.88419	7.45778	9.47578	10.4112	9.25664
NCDN	ENSG00000020129	2.4312	-1.02164	-0.0308833	0.881232	0.999994	1	7.54443	7.51545	6.33653	7.33709	7.10833	7.60735
PSMB2	ENSG00000126067	25.5136	-1.29123	-0.368747	0.161284	0.999994	1	65.0923	81.9375	32.9388	96.0606	52.0622	82.2797
C1orf216	ENSG00000142686	2.70831	1.01481	0.0212105	0.94631	0.999994	1	7.28517	9.24573	7.41061	8.41452	7.39831	7.98851
CLSPN	ENSG00000092853	7.12134	-1.19432	-0.256188	0.412243	0.999994	1	18.4102	28.0053	8.17152	23.1122	12.3929	28.7321
AGO4	ENSG00000134698	3.01066	1.14758	0.198592	0.310047	0.999994	1	8.69614	9.67201	8.23767	7.65887	8.27338	7.51682
AGO1	ENSG00000092847	6.76132	-1.03716	-0.052637	0.777276	0.999994	1	19.535	22.7391	16.4713	19.6958	21.6296	20.0854
AGO3	ENSG00000126070	4.95674	-1.00061	-0.000885734	0.99679	0.999994	1	11.2018	13.6712	18.3121	12.6338	16.5526	15.0513
TEKT2	ENSG00000092850	1.05045	1.34042	0.42269	0.273645	0.999994	1	3.16562	3.42237	2.71538	2.35668	2.72052	1.93478
ADPRHL2	ENSG00000116863	4.52035	1.02404	0.0342732	0.903936	0.999994	1	13.2491	13.5254	13.0719	13.4224	12.9497	13.0217
COL8A2	ENSG00000171812	0.256127	1.76094	0.816345	0.0841472	0.999994	1	0.857304	0.859305	0.56423	0.409648	0.477823	0.412549
TRAPPC3	ENSG00000054116	7.02587	-1.01328	-0.019036	0.923488	0.999994	1	20.2202	23.6338	18.357	21.7102	18.3611	23.3954
MAP7D1	ENSG00000116871	8.35581	1.03371	0.0478249	0.810173	0.999994	1	25.2952	26.0698	22.5097	25.9885	23.173	22.9868
THRAP3	ENSG00000054118	50.4062	-1.15831	-0.212021	0.304497	0.999994	1	140.954	165.306	88.2709	168.251	130.651	157.549
SH3D21	ENSG00000214193	0.28706	1.41498	0.50078	0.249091	0.999994	1	0.851676	0.752115	0.914666	0.664232	0.905742	0.251837
EVA1B	ENSG00000142694	0.618615	1.85156	0.888738	0.0840372	0.999994	1	2.14148	1.22059	2.04988	0.816929	1.48403	0.667016
STK40	ENSG00000196182	5.13839	-1.07798	-0.108331	0.576768	0.999994	1	16.0558	13.5613	13.1683	16.2701	14.8442	15.4838
LSM10	ENSG00000181817	3.77553	-1.04619	-0.0651405	0.845214	0.999994	1	8.98435	12.8296	10.5628	12.5688	9.17632	12.4188
OSCP1	ENSG00000116885	0.864183	1.06337	0.0886448	0.823847	0.999994	1	2.75009	2.7077	2.19872	3.02799	2.6451	1.60464
MRPS15	ENSG00000116898	13.437	-1.10303	-0.141471	0.473396	0.999994	1	37.4533	45.2307	27.4629	43.631	33.5072	44.4908
AL596257.1	ENSG00000284705	0.127914	-1.26217	-0.335906	0.553672	0.999994	1	0.292975	0.431104	0.188052	0.440668	0.253037	0.461285
GRIK3	ENSG00000163873	3.3774	-1.15433	-0.207051	0.409696	0.999994	1	8.1367	8.33326	9.65253	9.44973	10.0008	11.1934
ZC3H12A	ENSG00000163874	0.445397	-1.05456	-0.076645	0.845794	0.999994	1	1.03962	1.72496	1.03257	1.47227	0.902198	1.64836
MEAF6	ENSG00000163875	18.7058	1.00402	0.00579131	0.975738	0.999994	1	55.9726	61.8137	47.9445	57.4231	52.8717	56.0054
SNIP1	ENSG00000163877	4.20681	-1.13372	-0.181059	0.379838	0.999994	1	10.6582	12.5283	10.1624	12.5494	13.5799	12.0836
DNALI1	ENSG00000163879	0.0192674	1.93704	0.953853	0.250919	0.999994	1	0.0759113	0.0236942	0.0682154	0.029602	0.0278146	0.0278883
GNL2	ENSG00000134697	11.3428	1.04036	0.0570785	0.774252	0.999994	1	32.2546	45.5615	23.4839	34.3137	28.0579	34.9111
C1orf109	ENSG00000116922	4.25552	1.09749	0.134203	0.504413	0.999994	1	10.2226	14.8466	12.454	11.9293	11.5444	11.1406
CDCA8	ENSG00000134690	10.4218	-1.03731	-0.0528464	0.821277	0.999994	1	29.5709	41.2496	20.3614	31.8528	23.3872	38.9959
MANEAL	ENSG00000185090	0.963236	-1.20672	-0.271089	0.336556	0.999994	1	2.44711	1.9591	2.71939	2.70981	3.20327	2.84117
YRDC	ENSG00000196449	5.49374	-1.08904	-0.123054	0.601394	0.999994	1	14.2467	15.8543	15.0778	17.6304	18.4438	13.8526
C1orf122	ENSG00000197982	3.05054	1.01732	0.0247805	0.929699	0.999994	1	9.07184	9.65424	8.24297	8.12962	8.86094	9.77563
MTF1	ENSG00000188786	1.35822	1.01704	0.0243741	0.914518	0.999994	1	3.14734	4.4207	4.35653	3.79754	4.66198	3.47658
INPP5B	ENSG00000204084	1.95445	1.1084	0.148479	0.480656	0.999994	1	6.41421	5.30272	5.51998	5.35456	5.75296	4.65492
SF3A3	ENSG00000183431	20.3339	-1.05414	-0.0760701	0.691463	0.999994	1	60.7781	71.6484	42.1267	65.4961	54.0138	64.6882
FHL3	ENSG00000183386	4.62688	-1.06452	-0.0901968	0.747441	0.999994	1	12.4625	12.3284	14.0557	12.2099	18.2759	11.6891
UTP11	ENSG00000183520	19.372	-1.06528	-0.0912307	0.638092	0.999994	1	53.4754	69.2946	41.6259	63.4955	51.505	60.4811
POU3F1	ENSG00000185668	0.611024	-1.00518	-0.00746076	0.98403	0.999994	1	1.40704	2.22558	1.7599	1.40137	1.94378	2.13753
RRAGC	ENSG00000116954	8.82946	-1.04064	-0.0574703	0.815625	0.999994	1	26.822	29.4187	20.3299	25.8219	26.867	27.4483
AL139260.1	ENSG00000228436	0.226398	1.16131	0.215749	0.668723	0.999994	1	0.506379	0.632224	0.834243	0.526574	0.804015	0.403072
MYCBP	ENSG00000214114	3.42684	-1.08082	-0.112123	0.733145	0.999994	1	9.51473	12.736	6.50394	11.7969	6.6597	12.4808
AKIRIN1	ENSG00000174574	33.891	-1.0752	-0.104604	0.592533	0.999994	1	86.2641	114.714	82.89	103.715	97.36	106.263
NDUFS5	ENSG00000168653	90.1238	-1.10322	-0.141725	0.59964	0.999994	1	265.218	333.699	144.403	319.898	179.693	314.191
MACF1	ENSG00000127603	6.68345	-1.08	-0.111034	0.592165	0.999994	1	21.4377	20.8111	13.7022	19.6976	18.8159	22.0822
PABPC4	ENSG00000090621	29.3123	-1.10919	-0.149502	0.431924	0.999994	1	83.1188	78.1041	75.7305	86.5601	102.496	77.5361
HEYL	ENSG00000163909	1.12056	1.39604	0.481337	0.0550536	0.999994	1	3.6506	3.43133	2.84558	2.15153	2.69043	2.33178
PPIE	ENSG00000084072	1.89984	1.10777	0.147653	0.478797	0.999994	1	6.32851	6.48192	4.11768	5.38512	4.87568	5.07336
BMP8B	ENSG00000116985	0.275885	1.30812	0.387493	0.367914	0.999994	1	0.899506	0.984493	0.577367	0.65598	0.577848	0.656629
TRIT1	ENSG00000043514	2.44685	1.03893	0.0551047	0.781043	0.999994	1	6.93815	8.42809	6.31231	6.74374	7.82582	6.5055
MYCL	ENSG00000116990	2.96676	1.37332	0.45767	0.0388077	0.999994	1	8.32903	7.00678	10.5465	5.82286	7.80911	5.66985
MFSD2A	ENSG00000168389	0.331854	1.17218	0.2292	0.581261	0.999994	1	0.633131	0.658731	1.55511	0.757139	1.14446	0.620266
CAP1	ENSG00000131236	37.615	-1.17542	-0.233173	0.290053	0.999994	1	103.353	123.866	63.2536	119.024	84.3287	136.749
PPT1	ENSG00000131238	20.2729	-1.03119	-0.0443068	0.811665	0.999994	1	64.1774	66.3619	46.8577	62.285	58.1222	63.4296
RLF	ENSG00000117000	10.5635	-1.05498	-0.0772212	0.705239	0.999994	1	26.4696	36.8993	26.7614	30.2568	35.0228	30.7186
AL050341.2	ENSG00000259943	1.93013	-1.2075	-0.272019	0.468358	0.999994	1	4.20723	5.24139	4.86559	5.73508	6.23329	5.56434
ZMPSTE24	ENSG00000084073	21.1873	-1.25656	-0.329475	0.109929	0.999994	1	50.0982	65.6698	36.8727	71.6492	52.7988	67.3206
COL9A2	ENSG00000049089	0.148248	1.18103	0.240048	0.608993	0.999994	1	0.642014	0.338161	0.33654	0.344241	0.573397	0.20638
SMAP2	ENSG00000084070	4.02093	-1.09731	-0.133969	0.567703	0.999994	1	11.5071	13.194	8.399	12.7841	10.3945	13.2346
ZFP69B	ENSG00000187801	4.33879	1.27352	0.348824	0.207561	0.999994	1	11.4467	10.3894	15.9526	9.53574	12.2928	8.59625
AL031985.3	ENSG00000260920	5.67286	1.21141	0.276692	0.321521	0.999994	1	15.1934	12.9121	21.2451	13.3846	16.9288	11.5187
ZFP69	ENSG00000187815	1.98895	1.04408	0.0622365	0.837802	0.999994	1	5.09932	6.60508	5.82773	5.40431	5.7225	5.87474
AL603839.3	ENSG00000238287	0.850412	1.38835	0.473373	0.326919	0.999994	1	2.42281	2.26869	2.76334	1.96225	2.35592	1.12973
EXO5	ENSG00000164002	3.01713	1.00564	0.00812015	0.974509	0.999994	1	7.67615	10.2952	8.65109	8.91608	8.9389	8.94248
ZNF684	ENSG00000117010	1.07359	1.0654	0.0913997	0.794011	0.999994	1	2.27253	3.54094	3.59416	3.50929	2.55798	2.90538
RIMS3	ENSG00000117016	1.18411	1.22759	0.295833	0.375991	0.999994	1	3.94537	2.41445	3.99205	2.65304	3.33802	2.62784
NFYC-AS1	ENSG00000272145	1.27775	-1.00945	-0.0135673	0.970508	0.999994	1	3.20817	3.4109	4.53459	4.10498	4.95915	2.46773
NFYC	ENSG00000066136	8.94655	1.07461	0.103813	0.573679	0.999994	1	26.2872	28.158	24.5948	23.7939	26.8162	23.8064
KCNQ4	ENSG00000117013	1.71526	1.30495	0.383991	0.168705	0.999994	1	5.4484	4.3593	5.26381	3.32161	5.08927	3.35485
CITED4	ENSG00000179862	2.37113	-1.26094	-0.334499	0.343507	0.999994	1	4.99215	6.44772	5.41419	6.74637	6.24441	8.49022
CTPS1	ENSG00000171793	8.60402	-1.09704	-0.13361	0.482655	0.999994	1	23.2951	28.3341	19.1455	27.199	21.943	28.7634
SLFNL1-AS1	ENSG00000281207	0.329454	1.01057	0.015168	0.967543	0.999994	1	0.927869	0.846851	1.10822	0.851898	1.11031	0.944972
SCMH1	ENSG00000010803	10.1692	1.07444	0.103579	0.568677	0.999994	1	31.0472	31.3278	27.5123	26.3991	29.5432	28.6154
FOXO6	ENSG00000204060	8.56188	-1.02643	-0.0376305	0.868977	0.999994	1	24.5914	23.3794	26.5982	20.3801	30.7529	26.7922
EDN2	ENSG00000127129	0.601566	-1.0505	-0.0710729	0.877174	0.999994	1	1.70942	0.960413	2.39635	1.67983	2.29244	1.50722
HIVEP3	ENSG00000127124	0.115417	-1.31923	-0.399696	0.251169	0.999994	1	0.277547	0.295989	0.214769	0.338222	0.334749	0.373873
FOXJ3	ENSG00000198815	17.5482	1.00185	0.00266812	0.989098	0.999994	1	49.5668	51.2137	53.5411	46.5958	70.4992	40.0238
RIMKLA	ENSG00000177181	0.941651	-1.21627	-0.282459	0.437077	0.999994	1	1.60047	1.98002	3.25265	2.08933	5.06231	1.48942
PPCS	ENSG00000127125	3.36134	1.00706	0.0101536	0.970952	0.999994	1	10.0956	10.5829	9.04242	8.75641	12.5686	8.59548
CCDC30	ENSG00000186409	0.249479	-1.00033	-0.000475744	0.998832	0.999994	1	0.695596	0.571763	0.906461	0.654143	0.872796	0.700086
PPIH	ENSG00000171960	21.2103	-1.12948	-0.175659	0.388581	0.999994	1	54.6613	72.8336	42.3229	68.9181	55.4139	67.7643
AC098484.4	ENSG00000285728	0.198891	1.45833	0.544315	0.286361	0.999994	1	0.442171	0.557368	0.733557	0.557072	0.299106	0.356129
CLDN19	ENSG00000164007	0.457602	-1.37766	-0.462222	0.308885	0.999994	1	1.28343	1.20179	0.534461	1.53806	0.705389	1.88027
P3H1	ENSG00000117385	3.50625	-1.05578	-0.0783093	0.752474	0.999994	1	10.3821	10.0338	9.38949	10.2741	10.5514	10.9926
C1orf50	ENSG00000164008	2.88506	1.05643	0.0791961	0.70541	0.999994	1	9.25749	8.92828	7.37014	7.89793	8.82788	7.6993
AC098484.3	ENSG00000283580	1.17888	1.13355	0.180851	0.702428	0.999994	1	3.13601	3.90424	3.36248	4.04392	2.46787	2.74934
TMEM269	ENSG00000274386	0.0586575	-1.22993	-0.29858	0.580819	0.999994	1	0.180488	0.0845037	0.16219	0.150819	0.212569	0.170506
SVBP	ENSG00000177868	7.28675	-1.12514	-0.170101	0.455688	0.999994	1	19.1256	23.0593	16.1757	22.9106	19.7409	23.3753
ERMAP	ENSG00000164010	1.46064	-1.0943	-0.13001	0.629356	0.999994	1	3.82416	3.81164	4.29558	3.9549	5.04869	4.27994
AL512353.1	ENSG00000228192	0.94435	1.37466	0.459075	0.194649	0.999994	1	1.92601	2.90796	3.40783	2.00864	2.42895	1.69489
ZNF691	ENSG00000164011	6.10421	1.04294	0.0606623	0.785374	0.999994	1	20.3245	17.1129	16.4973	17.0066	18.9018	16.4188
SLC2A1	ENSG00000117394	16.1686	1.13499	0.182675	0.376959	0.999994	1	45.3466	55.3609	42.4472	44.9397	46.4081	36.0626
SLC2A1-AS1	ENSG00000227533	0.0919333	-1.11832	-0.161333	0.782286	0.999994	1	0.303314	0.185231	0.248863	0.277698	0.492869	0.0726727
EBNA1BP2	ENSG00000117395	11.8045	-1.09561	-0.131737	0.608789	0.999994	1	34.1966	37.8919	25.1955	39.9128	32.0384	35.0023
CDC20	ENSG00000117399	26.9738	-1.09412	-0.129771	0.648319	0.999994	1	72.6566	116.365	36.4097	88.9321	48.4187	106.019
ELOVL1	ENSG00000066322	6.84394	1.038	0.0538096	0.829002	0.999994	1	22.2943	21.0447	17.3049	20.9493	19.437	18.5215
MED8	ENSG00000159479	7.73061	1.08473	0.117338	0.613565	0.999994	1	26.0826	22.3736	19.9722	21.0982	23.1016	19.5551
SZT2	ENSG00000198198	0.983311	1.04381	0.0618629	0.752845	0.999994	1	3.14464	2.76834	2.7624	2.84044	2.84294	2.72787
HYI	ENSG00000178922	1.81572	1.01016	0.0145823	0.964792	0.999994	1	5.90516	5.68367	4.51145	5.51216	6.01616	4.55809
PTPRF	ENSG00000142949	15.7149	1.05723	0.0802954	0.6753	0.999994	1	48.2245	51.5833	39.5141	46.3619	38.4773	47.6803
KDM4A	ENSG00000066135	9.5637	1.1795	0.23818	0.258175	0.999994	1	33.2236	25.0308	26.1809	23.7274	29.7184	19.2374
AL451062.3	ENSG00000284989	1.4691	-1.51443	-0.598772	0.202975	0.999994	1	4.14761	1.81766	2.72319	2.38523	6.32451	4.70977
KDM4A-AS1	ENSG00000236200	0.773906	1.07801	0.108367	0.766374	0.999994	1	2.08555	2.49119	2.24654	2.58058	1.93981	1.88601
ST3GAL3	ENSG00000126091	0.679949	1.37784	0.462403	0.126214	0.999994	1	1.80348	1.5207	2.58574	1.34447	2.13199	0.947581
AL451062.1	ENSG00000229444	8.89081	-1.05401	-0.0758837	0.83764	0.999994	1	27.4071	21.2739	26.7889	23.3438	34.4871	23.1848
AL357079.1	ENSG00000237950	0.242328	1.29949	0.37795	0.442536	0.999994	1	0.587892	0.36067	1.12945	0.474314	0.757646	0.424512
IPO13	ENSG00000117408	2.63734	-1.11589	-0.158194	0.499353	0.999994	1	6.56914	7.67089	6.95195	8.03612	7.86856	8.02416
DPH2	ENSG00000132768	6.47042	1.04774	0.067274	0.75275	0.999994	1	16.9515	20.5577	19.4519	16.7472	21.0236	17.4318
ATP6V0B	ENSG00000117410	5.00917	-1.08545	-0.118292	0.558487	0.999994	1	14.3074	14.0819	12.9977	15.6586	13.6991	16.0374
B4GALT2	ENSG00000117411	7.8445	-1.01075	-0.0154274	0.935739	0.999994	1	23.0469	24.8698	21.4088	23.7796	23.1159	23.8855
CCDC24	ENSG00000159214	0.214331	-1.22494	-0.292714	0.545751	0.999994	1	0.77532	0.533389	0.284374	0.647872	0.852254	0.453414
SLC6A9	ENSG00000196517	3.91471	1.49559	0.580713	0.200371	0.999994	1	10.8841	6.09871	16.7725	5.79121	13.3456	4.40811
AL139220.2	ENSG00000230615	0.0589431	1.16769	0.223662	0.732682	0.999994	1	0.14947	0.10997	0.249445	0.11241	0.264056	0.0764849
DMAP1	ENSG00000178028	4.67446	1.27779	0.35365	0.0997384	0.999994	1	16.0199	12.7475	12.5409	11.9208	11.9648	8.84474
ERI3	ENSG00000117419	12.6151	-1.02556	-0.0364135	0.851668	0.999994	1	36.7411	40.7161	33.1254	37.8433	38.8515	37.8165
ERI3-IT1	ENSG00000233602	0.480281	-1.03102	-0.0440754	0.930813	0.999994	1	1.91262	1.10869	1.22766	1.17203	2.00229	1.20456
RNF220	ENSG00000187147	2.44024	-1.02981	-0.0423759	0.832442	0.999994	1	6.82086	7.61315	6.81969	7.56418	8.38051	6.2411
TMEM53	ENSG00000126106	0.571812	1.07492	0.104232	0.795496	0.999994	1	1.70983	1.79379	1.55071	1.59281	1.49663	1.65764
RNU5D-1	ENSG00000200169	5.35699	-1.23545	-0.305041	0.568753	0.999994	1	6.31809	22.7546	10.0449	17.0569	4.27386	26.7824
KIF2C	ENSG00000142945	14.9335	-1.03315	-0.0470444	0.841554	0.999994	1	44.4242	60.5949	26.4839	47.4662	31.2065	56.2557
RPS8	ENSG00000142937	398.76	1.04483	0.0632662	0.745677	0.999994	1	1219.47	1100.57	1189.22	1066.87	1384.98	965.809
PLK3	ENSG00000173846	1.68376	1.09342	0.128849	0.73536	0.999994	1	3.84657	3.76056	6.95889	4.69821	5.55075	3.49242
BTBD19	ENSG00000222009	0.150683	-1.15938	-0.213352	0.633009	0.999994	1	0.304307	0.404929	0.446165	0.468419	0.45774	0.441301
PTCH2	ENSG00000117425	0.16795	-1.03326	-0.0472056	0.927841	0.999994	1	0.422773	0.296911	0.712336	0.494588	0.638996	0.396062
EIF2B3	ENSG00000070785	8.39163	-1.1196	-0.162987	0.451033	0.999994	1	25.106	27.3007	15.491	26.1222	22.492	27.4152
HECTD3	ENSG00000126107	5.22724	-1.044	-0.0621161	0.78171	0.999994	1	16.6285	18.6828	10.0883	15.9812	13.3179	18.0329
UROD	ENSG00000126088	5.389	-1.05425	-0.0762171	0.735026	0.999994	1	16.6094	19.0251	10.6629	17.8757	13.3971	17.5039
ZSWIM5	ENSG00000162415	0.233661	1.82206	0.865569	0.0736858	0.999994	1	0.471734	0.614953	0.93925	0.23806	0.579548	0.326222
LINC01144	ENSG00000281912	0.503833	1.15792	0.21153	0.646573	0.999994	1	1.31876	1.23487	1.83684	1.65848	1.08721	1.12643
HPDL	ENSG00000186603	13.1829	-1.41505	-0.500858	0.0510238	0.999994	1	30.0361	32.0293	22.0242	44.0428	32.7735	42.5025
MUTYH	ENSG00000132781	1.17676	-1.0675	-0.094231	0.732377	0.999994	1	3.87329	3.2624	2.78974	3.39273	3.9795	3.32503
TOE1	ENSG00000132773	7.64331	-1.07826	-0.108699	0.607521	0.999994	1	21.5896	23.9551	18.2192	25.8443	24.0998	19.4469
TESK2	ENSG00000070759	1.57102	1.25411	0.326661	0.330789	0.999994	1	3.77091	3.62648	6.22772	3.09995	5.06	3.03281
CCDC163	ENSG00000280670	0.0328557	-1.08945	-0.123597	0.856473	0.999994	1	0.0613458	0.0765915	0.128629	0.119611	0.134866	0.0450745
MMACHC	ENSG00000132763	0.428621	-1.52858	-0.61219	0.0737164	0.999994	1	1.0161	1.22331	0.321086	1.76346	0.773257	1.32909
PRDX1	ENSG00000117450	307.073	-1.18407	-0.243757	0.447749	0.999994	1	924.707	1127.52	322.562	1084.28	541.711	1143.84
AKR1A1	ENSG00000117448	15.2431	1.04108	0.0580877	0.759842	0.999994	1	51.2648	50.5918	33.8445	43.9548	42.7106	44.2173
NASP	ENSG00000132780	17.0843	1.01773	0.0253524	0.914401	0.999994	1	51.0949	66.6559	34.8602	54.5164	39.8812	55.2362
CCDC17	ENSG00000159588	0.165611	-1.02416	-0.0344468	0.949049	0.999994	1	0.356278	0.508367	0.579335	0.396951	0.820561	0.299176
GPBP1L1	ENSG00000159592	15.4613	-1.02904	-0.0413031	0.818437	0.999994	1	45.7052	50.1061	39.3881	47.7015	46.0718	46.5031
TMEM69	ENSG00000159596	26.5671	1.12117	0.165011	0.455994	0.999994	1	86.7395	69.2585	77.9112	68.9697	88.3246	55.0522
IPP	ENSG00000197429	1.32335	-1.2429	-0.313705	0.313102	0.999994	1	3.51215	3.75856	2.34999	4.12653	3.24228	4.60819
AL604028.1	ENSG00000230896	0.42816	1.34442	0.426989	0.455146	0.999994	1	1.31986	1.85385	0.677743	1.21319	0.518152	1.14295
MAST2	ENSG00000086015	2.06537	-1.04638	-0.0654081	0.781576	0.999994	1	5.75507	5.31526	6.53528	5.59381	8.16733	5.06485
PIK3R3	ENSG00000117461	6.06161	-1.13843	-0.187051	0.40774	0.999994	1	12.1564	21.0463	14.7388	17.5204	14.3429	22.9825
AL358075.4	ENSG00000278139	0.897777	1.31922	0.399681	0.643112	0.999994	1	3.7754	1.73363	2.414	0.0849367	3.83079	2.24055
POMGNT1	ENSG00000085998	2.60192	-1.00674	-0.00968645	0.962913	0.999994	1	9.05454	7.92415	6.13109	7.64074	7.32958	8.42323
RAD54L	ENSG00000085999	5.04575	1.00392	0.00564581	0.978015	0.999994	1	16.9766	16.2981	11.5907	15.4937	12.2939	17.0346
LRRC41	ENSG00000132128	6.02128	1.0099	0.0142123	0.943449	0.999994	1	18.5586	18.3534	16.3063	16.7987	19.0248	17.4723
UQCRH	ENSG00000173660	107.341	-1.07576	-0.105352	0.574548	0.999994	1	313.751	343.947	242.275	342.603	304.91	325.688
NSUN4	ENSG00000117481	4.39358	1.03469	0.0491931	0.795991	0.999994	1	13.2221	13.3535	12.2166	11.9398	14.234	11.7989
FAAH	ENSG00000117480	0.676879	1.24289	0.313704	0.361088	0.999994	1	1.61431	1.47287	2.77112	1.40429	1.911	1.52829
DMBX1	ENSG00000197587	23.8993	1.04349	0.0614195	0.757085	0.999994	1	59.1022	82.0662	69.5893	66.9782	67.6417	69.6875
MKNK1	ENSG00000079277	1.17609	1.04274	0.0603828	0.843588	0.999994	1	3.5349	3.2708	3.54064	3.27724	3.77048	3.03361
MOB3C	ENSG00000142961	0.199071	-1.01834	-0.0262249	0.947052	0.999994	1	0.524125	0.696023	0.52237	0.680047	0.513283	0.609168
ATPAF1	ENSG00000123472	5.18184	-1.00145	-0.00208788	0.992351	0.999994	1	17.3689	18.7655	10.1822	16.2531	13.8526	16.2534
EFCAB14	ENSG00000159658	4.87336	1.09606	0.132329	0.499101	0.999994	1	15.0665	14.9747	13.0512	12.1912	14.7713	12.7997
STIL	ENSG00000123473	7.46211	-1.10108	-0.138913	0.511222	0.999994	1	22.8801	24.7119	13.8414	22.4428	18.5888	26.521
CMPK1	ENSG00000162368	21.794	-1.21847	-0.28507	0.12793	0.999994	1	53.4876	56.1141	50.8985	68.5098	64.3409	64.8507
FOXD2-AS1	ENSG00000237424	0.0143648	-4.54978	-2.1858	0.136259	0.999994	1	0	0.0210405	0	0.0788601	0	0.0495298
SPATA6	ENSG00000132122	1.22541	1.27034	0.345213	0.262715	0.999994	1	4.6237	3.34276	2.90931	2.51018	3.38138	2.74156
BEND5	ENSG00000162373	1.07605	1.14367	0.193668	0.589923	0.999994	1	3.36892	3.47502	2.69626	2.43245	3.4139	2.5527
DMRTA2	ENSG00000142700	0.265025	1.06314	0.0883373	0.856521	0.999994	1	0.836399	0.949833	0.575697	1.06175	0.547724	0.627628
FAF1	ENSG00000185104	7.10455	-1.00148	-0.00212665	0.991171	0.999994	1	21.5306	21.5526	19.6565	20.3128	25.4484	17.9598
CDKN2C	ENSG00000123080	1.7321	-1.18262	-0.241983	0.388781	0.999994	1	5.19309	5.6499	2.48439	4.78588	3.94249	6.93822
RNF11	ENSG00000123091	11.8466	-1.05952	-0.0834095	0.651345	0.999994	1	35.3623	35.0468	30.0842	36.0497	38.2739	33.2838
TTC39A	ENSG00000085831	0.0602823	1.21786	0.284348	0.513488	0.999994	1	0.264963	0.135332	0.135284	0.133851	0.165485	0.139376
EPS15	ENSG00000085832	11.6189	1.11453	0.156432	0.396278	0.999994	1	36.4715	34.867	31.3595	28.3462	34.908	30.0064
OSBPL9	ENSG00000117859	4.47886	-1.00862	-0.0123847	0.947403	0.999994	1	14.5813	14.8511	10.3857	14.0792	13.2532	13.0464
NRDC	ENSG00000078618	19.1286	-1.20171	-0.265087	0.172256	0.999994	1	51.3077	59.486	33.4052	60.4321	50.5796	62.2636
AL050343.2	ENSG00000266993	0.432025	1.22037	0.287319	0.581215	0.999994	1	0.681853	0.928698	2.08884	0.797677	1.53309	0.819815
RAB3B	ENSG00000169213	0.132219	1.20795	0.272561	0.393455	0.999994	1	0.476424	0.479164	0.229918	0.314801	0.31034	0.354919
TXNDC12	ENSG00000117862	8.02242	-1.04101	-0.0579785	0.761099	0.999994	1	23.3046	22.8247	22.8925	24.9641	23.0537	24.7312
AL445685.3	ENSG00000285839	3.67567	-1.10299	-0.141414	0.687175	0.999994	1	8.09033	15.4704	6.73443	8.43512	9.79803	15.0801
KTI12	ENSG00000198841	3.18329	1.06262	0.0876316	0.777209	0.999994	1	9.44015	10.1687	8.54242	9.30607	8.52646	8.91283
BTF3L4	ENSG00000134717	14.8123	1.03005	0.0427191	0.817471	0.999994	1	43.1736	46.1075	41.4796	42.679	42.3107	43.3525
ZFYVE9	ENSG00000157077	8.5511	1.10173	0.139772	0.461178	0.999994	1	24.1462	27.5631	23.8088	22.6505	24.5686	22.1308
CC2D1B	ENSG00000154222	2.09528	-1.10709	-0.146771	0.512241	0.999994	1	5.94232	5.92355	5.1371	6.52934	6.35006	6.13476
ORC1	ENSG00000085840	13.5692	-1.16311	-0.217993	0.26999	0.999994	1	35.2242	39.4619	30.3221	42.4544	39.752	40.8726
PRPF38A	ENSG00000134748	11.015	-1.06276	-0.0878171	0.630941	0.999994	1	29.99	36.4563	26.8775	34.3094	31.2337	34.3253
TUT4	ENSG00000134744	5.63307	1.11198	0.153125	0.397546	0.999994	1	16.4965	17.862	15.4183	14.189	16.278	14.8098
COA7	ENSG00000162377	16.9208	-1.09224	-0.127293	0.497407	0.999994	1	42.9758	54.8397	41.5623	51.9136	51.1246	50.511
ZYG11B	ENSG00000162378	7.69556	-1.12246	-0.166665	0.396329	0.999994	1	20.748	25.559	15.6873	22.5605	20.3449	26.8122
ZYG11A	ENSG00000203995	3.38003	-1.10673	-0.146305	0.469465	0.999994	1	8.62347	10.6166	8.21331	10.285	9.54517	10.8147
ECHDC2	ENSG00000121310	0.255219	1.4549	0.54092	0.130039	0.999994	1	0.891545	0.720785	0.647932	0.524344	0.51946	0.520836
SCP2	ENSG00000116171	4.41345	-1.07446	-0.103607	0.661977	0.999994	1	13.5938	16.0425	7.6793	13.9051	11.2709	14.7866
PODN	ENSG00000174348	0.00495601	1.12112	0.164935	0.885754	0.999994	1	0.0230109	0.0107736	0.010339	0	0.0252943	0.0126806
SLC1A7	ENSG00000162383	5.8666	-1.06178	-0.0864788	0.788707	0.999994	1	15.5253	11.7454	21.5969	14.9545	27.6789	11.0319
CPT2	ENSG00000157184	1.52347	-1.08897	-0.122962	0.66945	0.999994	1	5.62707	4.97088	2.14416	5.1905	3.55033	5.03782
AL606760.2	ENSG00000236723	0.334729	-1.01962	-0.0280351	0.953909	0.999994	1	1.19462	0.946532	0.825775	0.913779	1.01012	1.11408
CZIB	ENSG00000162384	4.39026	-1.01091	-0.015655	0.944798	0.999994	1	12.104	14.5221	12.1592	12.7836	13.0711	13.7542
MAGOH	ENSG00000162385	30.2756	-1.06085	-0.0852158	0.719183	0.999994	1	84.0896	123.746	51.8507	102.487	64.8354	106.263
AL606760.1	ENSG00000226754	0.300102	-1.10881	-0.149011	0.739135	0.999994	1	0.668041	0.924721	0.83522	0.781518	1.08553	0.864322
LRP8	ENSG00000157193	1.01771	-1.00958	-0.0137607	0.942388	0.999994	1	2.72597	3.30143	2.94674	3.25944	2.7759	3.12445
NDC1	ENSG00000058804	23.0496	-1.10969	-0.150157	0.425342	0.999994	1	67.4252	70.8201	49.2338	72.1435	62.4699	74.2462
YIPF1	ENSG00000058799	2.86931	1.06729	0.0939566	0.754173	0.999994	1	8.8608	10.2677	6.41975	8.6167	6.69628	8.6977
HSPB11	ENSG00000081870	3.92505	-1.00113	-0.00162856	0.995647	0.999994	1	12.3869	15.4163	7.34245	11.923	9.42204	13.7097
LRRC42	ENSG00000116212	4.49947	1.17628	0.234229	0.406845	0.999994	1	17.3768	13.344	9.38779	10.7586	12.629	10.8823
TMEM59	ENSG00000116209	6.38879	1.07201	0.100318	0.588965	0.999994	1	20.1069	18.2162	18.0352	16.573	20.8828	15.8852
TCEANC2	ENSG00000116205	1.00094	1.06077	0.0851075	0.71416	0.999994	1	3.34981	2.71155	2.77288	2.83478	2.93863	2.65535
CYB5RL	ENSG00000215883	1.62674	1.02777	0.0395206	0.852989	0.999994	1	5.22335	5.32283	3.89921	4.72151	4.72801	4.69877
MRPL37	ENSG00000116221	42.3605	-1.08377	-0.116061	0.54306	0.999994	1	122.795	124.78	103.886	125.309	140.231	119.395
SSBP3	ENSG00000157216	52.5241	-1.13522	-0.182968	0.539131	0.999994	1	147.624	179.5	92.6868	168.057	124.843	182.292
ACOT11	ENSG00000162390	0.0554061	-1.0777	-0.107954	0.810568	0.999994	1	0.196234	0.19456	0.0777969	0.155296	0.209362	0.139944
TTC4	ENSG00000243725	6.67488	-1.08128	-0.112741	0.606748	0.999994	1	18.7492	22.1273	14.8295	20.705	19.8101	20.0407
PARS2	ENSG00000162396	3.08106	1.23621	0.305925	0.346065	0.999994	1	8.75803	8.15612	10.085	7.69829	9.36404	5.24826
PCSK9	ENSG00000169174	0.0162232	1.01103	0.0158227	0.983472	0.999994	1	0.0452735	0	0.0915382	0.039723	0.0622074	0.0374233
USP24	ENSG00000162402	6.6244	1.03196	0.0453837	0.805014	0.999994	1	18.2358	21.3262	18.8858	18.0312	21.0865	18.2586
PLPP3	ENSG00000162407	1.60797	-1.13878	-0.187495	0.610414	0.999994	1	4.02081	6.82915	2.05643	5.49194	3.53818	5.504
PRKAA2	ENSG00000162409	3.33748	1.01937	0.0276731	0.89088	0.999994	1	9.88792	10.8378	8.80972	9.68659	10.697	8.90015
DAB1	ENSG00000173406	3.55782	1.01312	0.0188056	0.952351	0.999994	1	10.3671	10.8897	10.1282	9.81262	14.5239	7.203
OMA1	ENSG00000162600	6.06638	1.11482	0.156813	0.439198	0.999994	1	18.4536	20.3325	15.0294	15.7877	15.8178	16.9961
MYSM1	ENSG00000162601	3.29374	-1.00875	-0.0125659	0.944962	0.999994	1	9.37106	10.3126	9.37514	9.80123	10.8632	9.03482
JUN	ENSG00000177606	25.9841	1.23647	0.306227	0.376643	0.999994	1	82.8256	97.0558	52.2634	67.9176	58.0895	61.7536
AC093425.1	ENSG00000224609	0.0660499	1.08613	0.119191	0.797115	0.999994	1	0.223098	0.194979	0.167067	0.165297	0.237061	0.139335
FGGY	ENSG00000172456	0.263005	1.20738	0.271878	0.398089	0.999994	1	0.90766	0.737179	0.682475	0.574261	0.641395	0.724757
HOOK1	ENSG00000134709	5.21307	1.03637	0.0515348	0.790166	0.999994	1	17.7204	13.7326	14.5398	14.1569	18.3253	12.5819
CYP2J2	ENSG00000134716	0.282879	-1.14757	-0.19858	0.679657	0.999994	1	0.834369	0.905592	0.494174	0.709892	0.854629	1.00319
TM2D1	ENSG00000162604	2.99984	1.15153	0.203557	0.343947	0.999994	1	9.1781	8.07747	9.12014	7.67623	9.49338	6.13917
PATJ	ENSG00000132849	1.79388	1.31176	0.391507	0.0882602	0.999994	1	4.90887	5.24825	5.60274	3.82849	5.18923	3.22854
L1TD1	ENSG00000240563	31.6863	-1.57564	-0.655941	0.0335969	0.999994	1	68.7235	84.2088	30.7062	97.1999	52.4756	136.062
KANK4	ENSG00000132854	0.0828158	-1.46318	-0.54911	0.349343	0.999994	1	0.140652	0.170443	0.193307	0.193582	0.190988	0.36475
USP1	ENSG00000162607	39.8138	-1.11288	-0.154301	0.466114	0.999994	1	110.757	138.683	74.8724	124.048	94.9507	141.229
DOCK7	ENSG00000116641	3.34061	1.02445	0.0348509	0.851505	0.999994	1	10.9718	11.169	7.57986	9.40147	9.882	9.87572
ATG4C	ENSG00000125703	3.51104	-1.07456	-0.103747	0.662743	0.999994	1	10.1138	11.5543	7.82031	10.1597	9.32747	12.3233
ALG6	ENSG00000088035	0.749323	-1.01523	-0.0218102	0.941883	0.999994	1	2.78442	2.07815	1.78196	2.64438	1.92001	2.21952
ITGB3BP	ENSG00000142856	3.3199	-1.01356	-0.0194316	0.925016	0.999994	1	11.0915	11.3821	7.11801	10.2452	8.92274	10.8813
EFCAB7	ENSG00000203965	1.43867	1.12678	0.1722	0.537558	0.999994	1	4.53663	4.79411	3.44611	3.79255	3.6722	3.94336
DLEU2L	ENSG00000116652	0.0949835	-1.15034	-0.202058	0.686277	0.999994	1	0.317169	0.222746	0.19951	0.371046	0.244049	0.244695
ROR1	ENSG00000185483	5.86527	-1.31949	-0.399984	0.0514257	0.999994	1	16.2083	13.8104	10.0946	19.943	17.5953	15.6725
CACHD1	ENSG00000158966	0.841627	-1.08607	-0.119113	0.629085	0.999994	1	2.11955	2.93198	1.94074	2.25417	1.68563	3.66334
RAVER2	ENSG00000162437	4.30404	1.06409	0.0896197	0.647177	0.999994	1	12.8636	14.9588	10.3993	11.9629	11.0772	13.0719
JAK1	ENSG00000162434	5.18259	-1.10614	-0.14554	0.435544	0.999994	1	14.3578	14.3982	13.2835	14.6383	18.94	13.5939
LINC01359	ENSG00000226891	0.386937	-1.19813	-0.26079	0.517921	0.999994	1	0.853217	0.738519	1.26927	0.956211	1.90729	0.679591
AK4	ENSG00000162433	6.81052	1.00269	0.0038783	0.984461	0.999994	1	17.8028	26.3605	16.3656	19.826	21.5811	19.3342
DNAJC6	ENSG00000116675	1.38482	1.14697	0.197829	0.33864	0.999994	1	4.49686	3.82387	3.89534	3.33653	3.70508	3.73275
LEPROT	ENSG00000213625	3.56122	-1.0442	-0.0624039	0.777072	0.999994	1	11.3141	12.298	7.26497	11.0195	8.51998	12.6833
LEPR	ENSG00000116678	0.312354	-1.00244	-0.00351478	0.992475	0.999994	1	0.565256	1.04467	1.11838	0.527859	1.10643	1.15854
PDE4B	ENSG00000184588	0.924355	1.00954	0.0136999	0.970785	0.999994	1	1.78032	1.60796	4.51583	2.74744	4.19848	1.25244
SGIP1	ENSG00000118473	0.0732052	-1.55461	-0.63655	0.302182	0.999994	1	0.245485	0.0673755	0.110299	0.183204	0.400113	0.0886312
WDR78	ENSG00000152763	0.603204	1.14774	0.198794	0.609918	0.999994	1	1.79953	1.41608	2.05743	1.40347	2.2567	1.05219
MIER1	ENSG00000198160	8.82905	-1.08064	-0.11189	0.538988	0.999994	1	24.144	27.6237	21.7269	27.161	26.5772	26.3772
SLC35D1	ENSG00000116704	3.96886	1.21839	0.284976	0.15378	0.999994	1	12.4533	11.593	10.9945	9.65924	9.65639	9.76223
SERBP1	ENSG00000142864	109.936	-1.05952	-0.0834106	0.684142	0.999994	1	342.491	397.698	201.517	373.045	271.329	350.55
GNG12	ENSG00000172380	24.0078	-1.01612	-0.023066	0.902215	0.999994	1	72.0523	86.9619	54.4757	77.5074	66.9918	73.1126
DIRAS3	ENSG00000162595	0.143361	1.04181	0.0590932	0.916481	0.999994	1	0.247629	0.541047	0.469773	0.386257	0.60489	0.242597
WLS	ENSG00000116729	14.1676	1.05057	0.0711756	0.723266	0.999994	1	48.7276	38.7376	37.7659	42.7906	51.2279	26.9917
RPE65	ENSG00000116745	9.57964	-1.60551	-0.683032	0.206904	0.999994	1	25.0828	8.06553	19.8172	20.9886	56.1664	10.9482
DEPDC1	ENSG00000024526	8.90853	1.11512	0.157198	0.505247	0.999994	1	30.2032	35.0328	14.7676	23.6266	17.0147	30.5519
AL359894.1	ENSG00000287453	0	-1.02358	-0.0336191	0.99212	0.999994	1	0	0	0	0	0	0
LRRC7	ENSG00000033122	0.0536629	-1.08723	-0.120652	0.831578	0.999994	1	0.099114	0.0749614	0.256921	0.12041	0.314276	0.0588202
LRRC40	ENSG00000066557	14.4088	-1.09822	-0.13517	0.532159	0.999994	1	48.2267	43.2278	27.3175	44.5875	36.2715	49.5901
SRSF11	ENSG00000116754	14.547	-1.00482	-0.00693421	0.970153	0.999994	1	40.6209	49.663	38.4758	43.8003	41.4993	45.1292
ANKRD13C	ENSG00000118454	3.46217	-1.04084	-0.0577436	0.770371	0.999994	1	9.84589	9.42447	10.4698	10.3772	12.0655	9.04295
HHLA3	ENSG00000197568	2.14454	1.21439	0.280233	0.425762	0.999994	1	5.72073	7.30084	5.92845	5.01936	4.81771	5.94911
CTH	ENSG00000116761	18.0043	1.25021	0.32217	0.418388	0.999994	1	62.4255	33.9837	60.9237	37.0475	62.8438	29.4975
AL354872.2	ENSG00000271992	2.14632	1.0326	0.0462777	0.924063	0.999994	1	6.17	4.07825	8.37108	5.37817	8.64402	4.53347
ZRANB2	ENSG00000132485	23.8079	1.06422	0.0898001	0.646866	0.999994	1	68.195	67.2565	73.7511	65.2389	69.2683	65.164
ZRANB2-AS2	ENSG00000229956	0.0742359	1.40264	0.488142	0.212402	0.999994	1	0.250109	0.216457	0.190699	0.128564	0.14996	0.192123
NEGR1	ENSG00000172260	0.00732315	1.5062	0.590911	0.425523	0.999994	1	0.0256103	0.0199844	0.0191783	0.00499344	0.0328435	0.00470436
LRRIQ3	ENSG00000162620	0	-1.02358	-0.0336244	0.992132	0.999994	1	0	0	0	0	0	0
FPGT	ENSG00000254685	0	-1.02358	-0.033624	0.992105	0.999994	1	0	0	0	0	0	0
FPGT-TNNI3K	ENSG00000259030	0.00125393	5.97896	2.57989	0.335782	0.999994	1	0.00569693	0	0.00511937	0	0	0
CRYZ	ENSG00000116791	2.74015	-1.04806	-0.0677187	0.835864	0.999994	1	8.19776	11.3206	4.31582	8.94447	5.18827	10.6018
TYW3	ENSG00000162623	5.00481	-1.07123	-0.0992621	0.605985	0.999994	1	13.6545	16.3999	11.9958	14.8452	15.9492	14.6588
AC099786.3	ENSG00000261213	2.04698	-1.23915	-0.309355	0.452182	0.999994	1	3.55854	4.34306	6.71891	5.8937	6.98822	5.72877
AC099786.1	ENSG00000224127	8.33633	-1.29409	-0.37194	0.295112	0.999994	1	22.8873	21.589	13.7617	25.397	23.956	26.2451
LHX8	ENSG00000162624	68.1247	-1.02246	-0.0320407	0.867133	0.999994	1	230.497	226.415	145.538	210.779	205.188	202.201
AC099786.2	ENSG00000224149	17.5785	-1.23109	-0.29993	0.172159	0.999994	1	50.2862	48.5253	30.3784	54.5171	50.1282	54.7455
ACADM	ENSG00000117054	9.26835	-1.13368	-0.181018	0.432373	0.999994	1	28.819	28.6193	16.6082	34.5417	21.2746	27.9822
RABGGTB	ENSG00000137955	14.4906	1.01006	0.0144473	0.942578	0.999994	1	43.8539	44.4976	39.6733	45.187	49.357	33.8804
ST6GALNAC3	ENSG00000184005	2.00243	-1.0758	-0.105414	0.696289	0.999994	1	4.6199	4.24551	7.57953	5.56013	8.59276	4.12683
ST6GALNAC5	ENSG00000117069	0.599966	1.00397	0.00571413	0.986582	0.999994	1	2.18659	1.59444	1.53012	2.00287	1.78989	1.54851
PIGK	ENSG00000142892	4.61372	-1.11848	-0.16154	0.483938	0.999994	1	14.7537	15.3087	7.42371	14.6045	10.7668	16.362
AK5	ENSG00000154027	0.902944	1.07793	0.108269	0.756364	0.999994	1	3.30244	3.0012	1.76454	2.29717	2.89876	2.31621
AC118549.1	ENSG00000036549	6.0647	-1.0227	-0.032378	0.855521	0.999994	1	18.2999	19.1636	15.8598	17.9014	20.3704	16.8513
USP33	ENSG00000077254	9.26699	1.04943	0.0696029	0.709399	0.999994	1	29.0522	29.1348	23.8807	24.8541	26.1303	27.8791
MIGA1	ENSG00000180488	2.44565	-1.06189	-0.0866389	0.65982	0.999994	1	7.93217	6.71351	6.05755	7.606	8.65807	5.98161
NEXN	ENSG00000162614	0.0802458	1.18421	0.24392	0.601782	0.999994	1	0.139798	0.249911	0.308353	0.252752	0.12573	0.224112
FUBP1	ENSG00000162613	34.8239	1.02094	0.0298983	0.892285	0.999994	1	114.177	127.728	69.2771	113.329	75.2271	115.322
DNAJB4	ENSG00000162616	3.90725	1.00417	0.00600452	0.980079	0.999994	1	10.4621	14.5452	9.67519	11.3307	12.7056	10.7755
AC103591.3	ENSG00000273338	1.04808	-1.14523	-0.19564	0.778044	0.999994	1	1.07898	1.76811	5.09037	3.47123	0.889536	5.05405
PTGFR	ENSG00000122420	0	-1.02358	-0.0336291	0.992092	0.999994	1	0	0	0	0	0	0
IFI44L	ENSG00000137959	0.00353453	-1.86685	-0.900607	0.42209	0.999994	1	0.00550555	0.00515534	0.00494739	0.025763	0.00605186	0
IFI44	ENSG00000137965	0.255424	1.30352	0.382416	0.462151	0.999994	1	0.802222	0.673483	0.770609	0.485427	0.304078	0.945137
TTLL7	ENSG00000137941	5.79619	-1.01173	-0.0168217	0.926736	0.999994	1	20.109	17.9139	13.4831	17.2028	18.0325	17.2143
TTLL7-IT1	ENSG00000233061	0.201058	-1.43634	-0.522394	0.297488	0.999994	1	0.482513	0.379529	0.398908	0.383844	0.678902	0.765787
AL359504.2	ENSG00000271576	2.28464	1.08079	0.11208	0.752879	0.999994	1	5.70459	4.91306	9.17663	5.9321	8.86406	4.11388
PRKACB	ENSG00000142875	7.87506	-1.11534	-0.157488	0.38801	0.999994	1	19.267	24.3794	19.7602	25.1074	24.1622	22.2043
SAMD13	ENSG00000203943	0.175502	-1.09944	-0.136764	0.75309	0.999994	1	0.261079	0.62646	0.527875	0.477231	0.484289	0.629444
RPF1	ENSG00000117133	27.1466	1.01562	0.0223543	0.904442	0.999994	1	82.5711	95.7609	63.0722	84.8754	79.6152	74.4536
GNG5	ENSG00000174021	109.982	-1.03151	-0.0447547	0.831021	0.999994	1	322.867	392.888	248.097	336.491	257.938	400.518
AL359762.3	ENSG00000285851	0.522076	1.0551	0.0773777	0.84042	0.999994	1	2.1199	1.63128	0.924201	1.52238	1.56889	1.34171
SPATA1	ENSG00000122432	0.350647	1.05978	0.083763	0.84699	0.999994	1	0.790329	1.11008	1.17184	0.893761	1.10042	0.958159
CTBS	ENSG00000117151	2.85507	1.07442	0.103558	0.614585	0.999994	1	10.2363	8.13863	6.94821	8.18948	8.1061	7.46446
SSX2IP	ENSG00000117155	7.24613	1.23856	0.308669	0.0987246	0.999994	1	21.6789	24.0091	18.5193	17.5285	19.5475	15.2838
LPAR3	ENSG00000171517	1.51733	1.08618	0.119265	0.782713	0.999994	1	2.7742	3.26956	6.99172	3.87961	5.97628	2.63582
MCOLN2	ENSG00000153898	1.31869	1.12196	0.166024	0.678822	0.999994	1	2.65341	2.7607	5.93158	2.8742	4.82517	2.79807
WDR63	ENSG00000162643	0.16917	1.00909	0.0130607	0.982865	0.999994	1	0.359271	0.363331	0.736093	0.201744	1.12158	0.190064
MCOLN3	ENSG00000055732	0.921281	1.25522	0.327935	0.350256	0.999994	1	2.5533	2.44667	3.06691	1.96148	2.31082	2.27003
SYDE2	ENSG00000097096	8.11634	1.16494	0.220255	0.261593	0.999994	1	26.5116	26.1687	19.3945	20.7282	22.1567	19.4506
C1orf52	ENSG00000162642	4.82822	-1.02433	-0.0346779	0.874691	0.999994	1	13.6491	14.6486	13.9541	13.6728	16.0545	14.153
BCL10	ENSG00000142867	3.55673	1.006	0.00862972	0.971379	0.999994	1	10.6242	11.321	9.51211	10.1525	11.1223	10.3225
DDAH1	ENSG00000153904	7.58935	-1.0791	-0.109822	0.548467	0.999994	1	20.218	24.1914	18.8199	24.1556	23.4941	21.24
CCN1	ENSG00000142871	2.28956	1.33283	0.41449	0.315119	0.999994	1	4.5923	8.81646	6.78111	4.02253	8.4725	2.97577
ZNHIT6	ENSG00000117174	3.78839	1.03927	0.0555683	0.781787	0.999994	1	10.1611	14.5189	9.00028	10.5155	10.3202	11.7198
ODF2L	ENSG00000122417	2.58747	1.02866	0.0407601	0.839665	0.999994	1	7.99249	8.50135	6.45237	7.55274	7.06827	7.83959
SH3GLB1	ENSG00000097033	10.8921	-1.02583	-0.0367937	0.838295	0.999994	1	32.1416	33.7106	29.5015	32.6843	33.8539	32.3453
SELENOF	ENSG00000183291	45.0805	-1.09727	-0.133914	0.47045	0.999994	1	125.33	133.236	110.783	140.806	130.728	137.313
HS2ST1	ENSG00000153936	6.30638	-1.10501	-0.144057	0.431244	0.999994	1	19.6552	17.7012	14.0536	20.1963	17.8586	19.1191
AC093155.3	ENSG00000267561	0.167765	-1.28513	-0.361916	0.582803	0.999994	1	0.224051	0.209799	0.704678	0.360401	0.708064	0.463004
LINC01140	ENSG00000267272	0.0310313	-1.21943	-0.28621	0.65232	0.999994	1	0.00839316	0.125748	0.090507	0.108008	0.13839	0.0370017
LMO4	ENSG00000143013	6.69232	1.13063	0.177131	0.413417	0.999994	1	18.5011	22.6218	18.0646	17.3369	16.0729	19.3592
PKN2-AS1	ENSG00000237505	0.0199764	-1.32899	-0.410335	0.505191	0.999994	1	0.0237233	0.0349082	0.0730912	0.059471	0.0894081	0.0336168
PKN2	ENSG00000065243	10.86	-1.01157	-0.0165953	0.927441	0.999994	1	31.642	37.2681	27.3837	33.364	29.148	35.4685
GTF2B	ENSG00000137947	6.05316	1.02905	0.0413194	0.85069	0.999994	1	18.5838	20.8737	14.3313	19.1275	16.1311	17.3063
KYAT3	ENSG00000137944	17.2585	-1.19611	-0.258347	0.193583	0.999994	1	47.8792	46.276	35.8274	52.9489	54.2952	49.4591
RBMXL1	ENSG00000213516	5.40439	1.02559	0.0364491	0.853101	0.999994	1	16.0918	18.9598	12.9566	15.3507	14.7649	16.9415
GBP1	ENSG00000117228	1.90732	1.08283	0.114811	0.822211	0.999994	1	7.96604	3.80024	5.07447	5.31751	8.00448	2.55595
LRRC8B	ENSG00000197147	3.47144	-1.1004	-0.138034	0.497218	0.999994	1	9.15017	12.1291	7.24174	11.4995	7.91521	11.9761
LRRC8C-DT	ENSG00000231999	0.0132259	-1.4879	-0.573281	0.370299	0.999994	1	0.0188315	0.0308589	0.0296141	0.0275379	0.0569254	0.0363212
LRRC8C	ENSG00000171488	0.160607	1.01735	0.0248128	0.941499	0.999994	1	0.466441	0.423262	0.51854	0.438789	0.507439	0.461085
AC099568.2	ENSG00000272931	0.37707	-1.10096	-0.138756	0.811067	0.999994	1	1.13565	0.455747	1.45788	0.854072	1.605	0.983434
LRRC8D	ENSG00000171492	5.67975	1.20979	0.274753	0.365816	0.999994	1	17.6497	10.5647	21.175	10.5754	22.5303	9.11794
ZNF326	ENSG00000162664	5.89139	1.0951	0.131063	0.569933	0.999994	1	22.052	16.9739	13.3523	16.7584	15.3123	16.0088
BARHL2	ENSG00000143032	0.744478	1.01235	0.0177137	0.967968	0.999994	1	1.68248	1.91121	2.8751	2.19414	2.75898	1.61114
LINC02609	ENSG00000233593	0.180439	1.30432	0.383303	0.22839	0.999994	1	0.542009	0.525921	0.522354	0.399745	0.461955	0.372274
ZNF644	ENSG00000122482	23.8657	-1.08426	-0.116707	0.530896	0.999994	1	69.8334	71.4521	56.8441	71.036	74.3342	71.3034
HFM1	ENSG00000162669	1.22301	1.24113	0.311656	0.254961	0.999994	1	4.02415	3.65921	3.14564	2.82463	3.36822	2.61835
CDC7	ENSG00000097046	15.537	-1.06339	-0.0886768	0.661073	0.999994	1	45.5213	54.2575	32.39	53.6936	36.3664	50.4643
TGFBR3	ENSG00000069702	16.8025	1.04425	0.0624699	0.797395	0.999994	1	55.7392	44.9247	47.5072	44.2457	63.156	36.9971
BRDT	ENSG00000137948	10.9301	1.33698	0.418974	0.398834	0.999994	1	13.7625	12.3146	65.7639	13.2242	49.1736	11.1253
EPHX4	ENSG00000172031	0.898637	1.7328	0.793107	0.187579	0.999994	1	1.27787	1.14966	5.1562	0.908691	3.11232	0.635159
BTBD8	ENSG00000189195	1.11438	1.27141	0.346433	0.24187	0.999994	1	4.00294	3.25007	2.64083	2.57608	3.18538	2.09313
GLMN	ENSG00000174842	3.42581	-1.06573	-0.0918365	0.714187	0.999994	1	10.1904	11.7736	7.08562	11.2869	8.19891	11.5089
RPAP2	ENSG00000122484	2.96745	1.03034	0.0431178	0.820657	0.999994	1	9.20985	9.87193	7.25389	8.08169	9.53121	8.16417
EVI5	ENSG00000067208	2.53025	-1.03566	-0.0505477	0.798154	0.999994	1	6.83933	8.08828	6.99684	7.34763	7.89239	7.73311
RPL5	ENSG00000122406	293.225	-1.00438	-0.00630272	0.97451	0.999994	1	888.849	824.634	868.044	828.075	1053.14	755.43
DIPK1A	ENSG00000154511	4.13565	1.29427	0.372142	0.263036	0.999994	1	13.734	17.8303	5.73648	11.4154	7.15744	9.95047
SNORA66	ENSG00000207523	2.27073	1.70909	0.773226	0.178852	0.999994	1	3.39109	11.5108	5.33277	5.45479	3.26163	3.27027
MTF2	ENSG00000143033	6.57418	1.01085	0.0155671	0.936394	0.999994	1	18.8782	23.7187	15.8065	18.3446	17.8139	21.8793
TMED5	ENSG00000117500	7.32362	1.26053	0.33403	0.0869602	0.999994	1	21.4466	17.6236	24.9594	16.4901	19.7398	15.6704
CCDC18	ENSG00000122483	2.2087	1.24484	0.315957	0.165088	0.999994	1	6.23518	7.92844	5.44117	5.50294	5.46771	4.89757
CCDC18-AS1	ENSG00000223745	2.04574	1.32285	0.403652	0.232965	0.999994	1	5.07786	3.98198	8.61017	3.99876	6.85389	3.0059
DR1	ENSG00000117505	15.5336	-1.22057	-0.287555	0.15885	0.999994	1	38.4756	42.0586	34.0184	44.8	35.5546	60.1445
FNBP1L	ENSG00000137942	13.6377	-1.06411	-0.0896495	0.620348	0.999994	1	38.5731	42.3473	34.3567	37.9704	43.4481	42.4487
BCAR3	ENSG00000137936	0.85502	1.18525	0.245193	0.530493	0.999994	1	2.10221	2.10583	3.22903	1.85878	2.95569	1.64341
AL049796.1	ENSG00000260464	0.187306	-1.12243	-0.16663	0.757352	0.999994	1	0.415005	0.448392	0.631115	0.261423	0.59655	0.844419
DNTTIP2	ENSG00000067334	10.971	-1.12296	-0.167309	0.387015	0.999994	1	28.8183	37.2653	22.2646	33.082	30.7052	35.6711
GCLM	ENSG00000023909	2.67389	-1.25612	-0.328974	0.219669	0.999994	1	6.44188	7.85147	4.93915	9.07983	6.13314	8.96642
ABCA4	ENSG00000198691	0.715947	1.03721	0.0527046	0.892348	0.999994	1	1.61604	1.74178	2.85107	2.0989	2.08093	1.96285
ARHGAP29	ENSG00000137962	0.599267	1.07553	0.105054	0.74476	0.999994	1	1.75545	1.70413	1.81189	1.68025	1.89927	1.40032
ABCD3	ENSG00000117528	6.82943	-1.23901	-0.309185	0.116722	0.999994	1	16.8652	19.0474	13.7788	21.9184	16.782	23.1089
F3	ENSG00000117525	0.141395	-1.03798	-0.053773	0.920137	0.999994	1	0.390692	0.512176	0.315975	0.525616	0.322095	0.430597
SLC44A3	ENSG00000143036	0.00647732	8.49032	3.08582	0.23769	0.999994	1	0.0393007	0	0.0176582	0	0	0
CNN3	ENSG00000117519	90.9179	-1.24345	-0.314353	0.130087	0.999994	1	233.914	267.558	160.085	304.196	236.461	282.678
AC105942.1	ENSG00000235501	0.76695	-1.20571	-0.269888	0.458321	0.999994	1	1.76948	1.65692	2.23417	2.43689	2.06816	2.44393
ALG14	ENSG00000172339	0.519504	-1.09394	-0.129537	0.674802	0.999994	1	1.30402	1.58246	1.3715	1.64866	1.52983	1.53388
TLCD4-RWDD3	ENSG00000271092	0.685876	1.41907	0.50495	0.247345	0.999994	1	2.27117	2.04594	1.75674	1.00898	2.27533	1.04562
RWDD3	ENSG00000122481	3.65051	-1.28275	-0.359236	0.23051	0.999994	1	10.386	9.53356	5.83644	11.2603	10.9985	10.8664
PTBP2	ENSG00000117569	2.819	1.1297	0.175942	0.435966	0.999994	1	8.36697	11.6787	5.2122	8.03961	5.8249	8.38587
DPYD	ENSG00000188641	26.8117	-1.03102	-0.0440722	0.829467	0.999994	1	89.8029	93.8106	52.1248	83.3042	74.572	85.1559
MIR137HG	ENSG00000225206	2.51586	-1.19251	-0.254002	0.321458	0.999994	1	7.04196	7.08899	4.92416	7.02202	6.4689	9.29535
SNX7	ENSG00000162627	5.05462	1.04512	0.0636667	0.807586	0.999994	1	16.9649	17.367	10.7352	14.6138	12.652	15.9321
PLPPR5	ENSG00000117598	0.560089	1.45706	0.543061	0.0367777	0.999994	1	1.29574	1.15715	2.38267	1.05267	1.25287	1.11074
PLPPR4	ENSG00000117600	24.4977	-1.01832	-0.0261946	0.907604	0.999994	1	79.6501	64.2827	71.4928	69.0248	73.6157	79.6765
PALMD	ENSG00000099260	14.4394	1.03303	0.0468831	0.832798	0.999994	1	41.2248	33.2672	51.4519	33.6302	50.4656	40.8488
FRRS1	ENSG00000156869	2.24271	-1.20371	-0.267488	0.421406	0.999994	1	6.26726	7.0023	3.63512	6.9486	5.0416	8.28887
SLC35A3	ENSG00000117620	0.850218	-1.08966	-0.123873	0.55571	0.999994	1	2.46407	2.58236	1.97533	2.84647	2.29396	2.56241
AC118553.2	ENSG00000283761	2.56951	1.15084	0.202684	0.357626	0.999994	1	8.48831	8.73588	5.6593	6.74978	6.55721	6.6608
MFSD14A	ENSG00000156875	13.4833	-1.15487	-0.207729	0.280678	0.999994	1	31.5098	40.2607	33.0804	41.6772	37.4351	43.1043
SASS6	ENSG00000156876	13.3759	-1.14702	-0.19789	0.271038	0.999994	1	36.7187	36.5494	31.5039	42.4413	38.4276	40.4223
TRMT13	ENSG00000122435	4.59123	1.08986	0.12414	0.530564	0.999994	1	12.6827	14.2767	13.4925	11.9973	12.2773	13.3018
LRRC39	ENSG00000122477	1.16049	1.32382	0.404702	0.343937	0.999994	1	3.36958	1.93557	4.7328	2.12005	3.45494	2.24698
DBT	ENSG00000137992	2.41828	-1.07731	-0.107438	0.602694	0.999994	1	6.72352	6.38925	6.96968	6.51773	8.22406	7.24534
RTCA-AS1	ENSG00000224616	0.879914	-1.04026	-0.0569435	0.850049	0.999994	1	2.24743	2.71477	2.60527	2.91183	2.90894	2.17355
RTCA	ENSG00000137996	10.7703	1.00146	0.00210297	0.991917	0.999994	1	34.5092	30.993	29.6094	29.3174	38.2192	28.7659
CDC14A	ENSG00000079335	0.564371	1.06138	0.0859408	0.780579	0.999994	1	1.59345	1.50831	1.84435	1.45888	1.83724	1.44123
EXTL2	ENSG00000162694	5.40228	-1.05297	-0.0744583	0.72686	0.999994	1	15.7125	17.3295	13.1606	16.5089	15.3423	17.1317
SLC30A7	ENSG00000162695	3.16293	-1.02692	-0.0383306	0.842871	0.999994	1	8.31886	10.0855	9.19562	9.56324	10.7657	8.42437
DPH5	ENSG00000117543	12.6012	1.08764	0.121197	0.56198	0.999994	1	37.1669	33.0608	40.3073	29.4236	45.4663	28.9336
AC093157.1	ENSG00000233184	0.340372	1.44318	0.529255	0.123651	0.999994	1	1.09691	0.775704	1.10892	0.58147	0.95456	0.572993
LINC01709	ENSG00000226715	0.125196	-1.35934	-0.442901	0.383363	0.999994	1	0.37427	0.258235	0.194715	0.483935	0.346449	0.303945
OLFM3	ENSG00000118733	0.174397	-1.16428	-0.21944	0.635788	0.999994	1	0.503028	0.400376	0.44073	0.514916	0.483825	0.582127
RNPC3	ENSG00000185946	2.45369	1.1667	0.222429	0.352534	0.999994	1	6.4365	6.54214	8.46937	5.6858	7.5625	5.54665
AMY2B	ENSG00000240038	0.355874	1.27734	0.353139	0.394303	0.999994	1	0.79775	0.93728	1.35935	0.730761	1.05064	0.705044
PRMT6	ENSG00000198890	4.99154	1.11865	0.161763	0.525076	0.999994	1	18.1081	16.7495	9.74705	16.306	11.9658	11.611
VAV3	ENSG00000134215	0.259917	1.10379	0.142468	0.729841	0.999994	1	0.594171	0.8165	0.866776	0.875647	0.822774	0.408224
SLC25A24	ENSG00000085491	7.67154	-1.0927	-0.127902	0.514086	0.999994	1	21.9942	24.2526	17.0754	23.1415	21.5968	24.8134
AL359258.2	ENSG00000260879	0.308591	-1.16103	-0.215403	0.660235	0.999994	1	0.900013	1.11245	0.388209	1.01078	0.791456	0.99194
FAM102B	ENSG00000162636	4.06501	-1.19032	-0.251349	0.31166	0.999994	1	11.4623	11.2695	8.08955	11.6459	11.8507	13.3773
PRPF38B	ENSG00000134186	8.15331	-1.00354	-0.00509675	0.97798	0.999994	1	21.6672	27.4694	22.865	21.8485	28.0852	23.2549
STXBP3	ENSG00000116266	4.20027	-1.05927	-0.083064	0.693577	0.999994	1	12.7068	13.4844	9.57853	12.1228	13.0947	12.9185
AKNAD1	ENSG00000162641	0.28092	-1.02056	-0.0293553	0.936536	0.999994	1	0.760791	0.880019	0.814361	0.929289	0.701002	0.912483
GPSM2	ENSG00000121957	12.0183	-1.06475	-0.090512	0.670434	0.999994	1	33.3877	41.822	26.8067	33.8652	27.9922	46.8702
CLCC1	ENSG00000121940	8.45336	-1.0057	-0.00819794	0.966799	0.999994	1	27.4048	28.8413	18.9929	26.0944	20.5114	29.1775
WDR47	ENSG00000085433	6.68723	-1.21482	-0.280743	0.193462	0.999994	1	16.7869	21.0303	12.0153	20.4883	16.379	23.6572
TAF13	ENSG00000197780	8.74231	-1.11008	-0.150665	0.56772	0.999994	1	24.7881	29.0142	17.4295	27.9631	19.6839	31.4002
AL356488.3	ENSG00000273382	0.553283	-1.14319	-0.193061	0.608719	0.999994	1	1.50312	1.4989	1.35073	1.55292	1.95269	1.52756
TMEM167B	ENSG00000215717	5.05164	1.04493	0.0634068	0.765908	0.999994	1	14.9015	14.1845	15.3402	13.0638	19.0492	11.2207
SCARNA2	ENSG00000278249	528.417	1.1723	0.229336	0.258094	0.999994	1	1542.31	1288.72	1790.39	1304.46	1585.42	1140.03
AL356488.2	ENSG00000270066	3.26597	2.72682	1.44722	0.265118	0.999994	1	7.65774	14.094	7.35597	0	0	10.4771
SARS	ENSG00000031698	36.9843	1.32892	0.410252	0.238108	0.999994	1	126.083	77.4236	120.381	75.0522	115.747	59.0518
CELSR2	ENSG00000143126	0.94334	-1.08115	-0.112572	0.580504	0.999994	1	2.49148	2.84732	2.4916	2.90956	2.4827	3.15277
PSRC1	ENSG00000134222	3.1082	1.14203	0.191595	0.496952	0.999994	1	10.1893	12.4627	5.25245	7.20751	7.09791	10.0113
MYBPHL	ENSG00000221986	0.0453979	1.61337	0.690077	0.429612	0.999994	1	0.352555	0.0300118	0.0288012	0	0.211385	0.0353241
SORT1	ENSG00000134243	3.07673	-1.03235	-0.0459348	0.818261	0.999994	1	8.71565	9.58411	8.45928	9.17002	8.37868	10.3343
PSMA5	ENSG00000143106	6.5177	-1.13337	-0.180622	0.389421	0.999994	1	17.0094	20.9082	13.9685	22.2222	16.4492	20.3288
ATXN7L2	ENSG00000162650	1.12203	1.01253	0.0179639	0.948327	0.999994	1	3.39425	3.10771	3.36967	3.10102	3.99163	2.81461
CYB561D1	ENSG00000174151	0.534352	1.1647	0.21996	0.496994	0.999994	1	1.55556	1.60506	1.54922	1.48366	1.41586	1.20121
AMIGO1	ENSG00000181754	2.28665	1.06645	0.0928172	0.772233	0.999994	1	5.65852	5.45261	8.76053	4.93913	10.1376	4.18182
GNAI3	ENSG00000065135	5.72553	-1.09918	-0.13643	0.461079	0.999994	1	16.1145	16.7641	13.9569	16.7256	18.4342	16.848
GNAT2	ENSG00000134183	0.0742991	1.26267	0.336477	0.622214	0.999994	1	0.158696	0.445805	0.0713037	0.0928267	0.130833	0.306084
AMPD2	ENSG00000116337	2.90744	1.02105	0.0300532	0.877449	0.999994	1	8.37956	8.93334	8.3289	8.63778	9.25629	7.5571
GSTM4	ENSG00000168765	0.980956	-1.10008	-0.137606	0.688222	0.999994	1	2.93352	3.50279	1.65421	3.58154	2.51044	2.78832
GSTM2	ENSG00000213366	0.89892	-1.01351	-0.0193533	0.952383	0.999994	1	2.51888	3.25891	2.20304	3.03673	1.99736	3.08345
GSTM1	ENSG00000134184	0.0803148	1.47635	0.562034	0.286147	0.999994	1	0.493746	0.105077	0.121006	0.183787	0.14802	0.148412
GSTM3	ENSG00000134202	2.03987	1.00941	0.0135082	0.957601	0.999994	1	6.36168	6.71275	5.02347	6.49814	6.18405	5.38941
AHCYL1	ENSG00000168710	17.1796	-1.01733	-0.024784	0.892454	0.999994	1	55.134	53.8392	43.0445	53.5093	52.2723	50.1277
STRIP1	ENSG00000143093	5.27996	1.07024	0.0979283	0.617321	0.999994	1	15.3301	14.7144	16.349	14.2791	16.615	13.1902
AL160006.1	ENSG00000258634	2.00241	-1.02138	-0.0305171	0.915448	0.999994	1	5.49594	5.53451	6.47686	5.35011	7.62878	5.26144
SLC6A17	ENSG00000197106	0.181398	-1.03788	-0.0536384	0.901799	0.999994	1	0.552214	0.708013	0.328276	0.477059	0.326851	0.833337
AL355990.1	ENSG00000227091	0.00835291	-1.97468	-0.981617	0.551366	0.999994	1	0	0	0.0305189	0	0	0.0748616
KCNC4	ENSG00000116396	0.330497	1.25439	0.326984	0.4025	0.999994	1	0.625859	0.611345	1.59214	0.513573	1.18042	0.66249
RBM15-AS1	ENSG00000227963	0.240265	1.26287	0.336711	0.500134	0.999994	1	0.604577	0.970491	0.562688	0.631495	0.356019	0.713923
RBM15	ENSG00000162775	9.81194	1.02935	0.0417272	0.882793	0.999994	1	25.279	38.0613	23.8336	28.0196	25.9429	31.0543
LAMTOR5-AS1	ENSG00000224699	0.282325	1.18524	0.245179	0.508179	0.999994	1	1.0158	0.671669	0.800716	0.641083	0.847241	0.643251
AL355488.1	ENSG00000273373	0.879869	1.1555	0.208512	0.672298	0.999994	1	2.69026	1.83378	3.14633	1.75876	2.89198	2.15838
LAMTOR5	ENSG00000134248	12.9351	1.19432	0.256188	0.218971	0.999994	1	38.0803	47.264	29.7434	34.0538	28.3904	34.1899
AL360270.2	ENSG00000261654	0.172216	-1.24253	-0.313283	0.536223	0.999994	1	0.320269	0.414564	0.499418	0.374672	0.838705	0.363363
LRIF1	ENSG00000121931	4.59636	1.08527	0.11805	0.564997	0.999994	1	13.8125	13.8986	12.8606	10.49	14.4929	12.8812
DRAM2	ENSG00000156171	16.3684	1.0688	0.0959864	0.654415	0.999994	1	52.3884	39.7528	51.5008	41.8671	60.4899	34.9683
CEPT1	ENSG00000134255	8.19812	1.05194	0.0730515	0.683218	0.999994	1	25.9783	23.473	22.8993	22.0393	24.7501	22.8375
PIFO	ENSG00000173947	0.489257	1.08351	0.115706	0.789586	0.999994	1	1.77025	0.9224	1.59078	1.05218	2.32254	0.692314
OVGP1	ENSG00000085465	0.724059	1.21575	0.281849	0.680592	0.999994	1	0.581666	0.754153	4.70426	0.654299	3.86089	0.838331
AL390195.2	ENSG00000260948	1.48783	1.13117	0.177811	0.751048	0.999994	1	1.58847	2.94876	8.08878	1.8257	8.24034	1.78143
AL390195.1	ENSG00000243960	3.74396	-1.27711	-0.352888	0.380662	0.999994	1	6.48235	8.39991	11.1208	12.7923	13.1715	8.08262
WDR77	ENSG00000116455	13.3463	-1.12875	-0.174732	0.423774	0.999994	1	33.3642	40.6596	32.2836	37.3367	45.33	38.6696
ATP5PB	ENSG00000116459	37.682	-1.12348	-0.167981	0.364782	0.999994	1	106.43	108.761	86.6312	117.257	123.073	101.994
C1orf162	ENSG00000143110	0.21316	1.11122	0.152145	0.790006	0.999994	1	0.468449	0.476795	0.896822	0.57185	0.850758	0.29182
RAP1A	ENSG00000116473	4.49345	-1.10055	-0.13822	0.481246	0.999994	1	11.6076	14.3142	10.8154	13.8535	12.7818	14.1073
INKA2	ENSG00000197852	1.34814	1.00387	0.00557699	0.982386	0.999994	1	3.79197	2.84061	5.08753	3.40444	4.88556	3.70303
INKA2-AS1	ENSG00000227811	0.466102	1.31508	0.395146	0.338966	0.999994	1	1.63479	0.984085	1.46905	0.983563	1.54029	0.643487
DDX20	ENSG00000064703	9.61683	-1.17744	-0.23565	0.231044	0.999994	1	23.9236	29.6894	20.065	30.3137	27.3072	29.5712
LINC01750	ENSG00000231437	0.263816	-1.84821	-0.886127	0.167845	0.999994	1	0.61245	0.191164	0.465689	0.514399	1.65716	0.259618
CTTNBP2NL	ENSG00000143079	5.18671	-1.04011	-0.0567382	0.791373	0.999994	1	16.1	17.3033	11.6361	15.2021	14.4523	17.3651
WNT2B	ENSG00000134245	0.339458	1.03617	0.0512622	0.88107	0.999994	1	1.08434	1.04523	0.876153	0.874119	1.15188	0.898835
ST7L	ENSG00000007341	2.22186	1.14927	0.200721	0.319519	0.999994	1	7.3009	6.34165	5.99213	5.98689	6.34385	4.95824
CAPZA1	ENSG00000116489	44.5525	-1.15531	-0.208284	0.319253	0.999994	1	129.739	143.358	76.695	150.268	98.8167	153.658
MOV10	ENSG00000155363	5.1795	-1.0057	-0.00820665	0.970243	0.999994	1	18.6046	17.8916	9.83027	17.5092	12.3199	16.6483
RHOC	ENSG00000155366	4.86171	-1.05166	-0.0726644	0.761353	0.999994	1	17.8032	11.5332	12.1748	15.8825	15.5081	12.7571
PPM1J	ENSG00000155367	0.168094	-1.03921	-0.0554892	0.912109	0.999994	1	0.706182	0.440841	0.317294	0.52781	0.40969	0.583733
TAFA3	ENSG00000184599	0.862095	-1.1477	-0.198746	0.669154	0.999994	1	3.91384	1.72949	1.18552	2.31506	2.80368	2.71417
LINC01356	ENSG00000215866	0.569753	1.51564	0.599925	0.255917	0.999994	1	0.797033	0.713164	3.29466	0.704497	1.84959	0.800358
LINC01357	ENSG00000224167	3.94831	1.2026	0.26616	0.520817	0.999994	1	8.44942	7.77898	17.7378	7.0605	15.5318	6.80826
SLC16A1	ENSG00000155380	37.4219	-1.04503	-0.0635418	0.781347	0.999994	1	107.352	141.845	75.3816	129.883	83.5885	124.82
SLC16A1-AS1	ENSG00000226419	0.715688	1.03322	0.0471469	0.873263	0.999994	1	2.31698	2.12795	1.88626	2.01861	2.21447	1.96056
LRIG2	ENSG00000198799	3.61134	1.04881	0.0687501	0.759076	0.999994	1	10.1114	8.8542	12.5769	8.87701	12.8147	9.1107
MAGI3	ENSG00000081026	2.3878	1.08936	0.123478	0.552937	0.999994	1	7.55131	8.47638	5.24435	6.23947	5.68595	7.63581
PHTF1	ENSG00000116793	1.06373	-1.00911	-0.0130837	0.969328	0.999994	1	3.727	4.13785	1.69578	3.59662	2.23856	3.73504
RSBN1	ENSG00000081019	4.52036	-1.00867	-0.0124507	0.948582	0.999994	1	12.7487	13.2074	13.7965	12.7864	15.1133	12.8207
AP4B1	ENSG00000134262	0.956755	1.02029	0.0289806	0.918289	0.999994	1	2.79618	3.3677	2.33075	2.95532	2.22574	3.18805
DCLRE1B	ENSG00000118655	8.41891	-1.20946	-0.274357	0.177131	0.999994	1	21.0757	24.0888	17.5507	26.2756	24.2565	25.8147
HIPK1	ENSG00000163349	12.0927	1.04726	0.0666143	0.722841	0.999994	1	31.8676	36.5057	37.8686	30.6336	40.273	32.3309
OLFML3	ENSG00000116774	0.323861	1.25738	0.330426	0.453553	0.999994	1	1.13913	0.636258	1.05956	0.654624	0.900678	0.726856
SYT6	ENSG00000134207	2.67203	1.21771	0.284171	0.527639	0.999994	1	4.92634	3.52696	14.2336	4.57435	10.9639	4.12692
TRIM33	ENSG00000197323	8.56513	-1.08627	-0.119378	0.524266	0.999994	1	25.5058	24.0702	21.2742	26.3154	26.7913	24.6561
BCAS2	ENSG00000116752	26.4395	-1.12632	-0.171622	0.43993	0.999994	1	70.5476	89.6909	52.1941	82.0707	64.6152	92.6002
DENND2C	ENSG00000175984	0.0968165	-1.34748	-0.430262	0.376847	0.999994	1	0.228154	0.277733	0.143516	0.311395	0.150476	0.410714
NRAS	ENSG00000213281	31.7482	-1.19578	-0.25795	0.192795	0.999994	1	83.0405	100.2	57.1726	99.6771	83.4302	104.463
CSDE1	ENSG00000009307	107.924	-1.1361	-0.184092	0.329305	0.999994	1	309.321	329.59	219.085	338.316	319.272	321.462
SIKE1	ENSG00000052723	10.2353	1.01928	0.0275506	0.888175	0.999994	1	29.3554	35.1819	26.173	30.4813	28.2518	30.8778
VANGL1	ENSG00000173218	1.75352	-1.01035	-0.0148587	0.950459	0.999994	1	5.1297	6.28002	4.17277	4.60835	4.94672	6.25817
ATP1A1	ENSG00000163399	15.3174	1.09613	0.132413	0.534701	0.999994	1	54.3393	54.7494	28.0632	45.6517	34.3621	44.725
ATP1A1-AS1	ENSG00000203865	0.0543277	1.45977	0.545746	0.301775	0.999994	1	0.16444	0.194501	0.124437	0.151873	0.0475676	0.133542
CD58	ENSG00000116815	2.49407	-1.1243	-0.169021	0.588456	0.999994	1	7.11031	7.98962	4.94118	7.76357	5.59268	9.19489
IGSF3	ENSG00000143061	2.36617	-1.23651	-0.306279	0.262959	0.999994	1	5.14248	6.79145	5.28521	6.84489	4.78182	9.7485
PTGFRN	ENSG00000134247	12.9914	-1.23752	-0.307456	0.110531	0.999994	1	31.2123	37.1439	26.3301	37.8358	31.4631	48.2773
CD101	ENSG00000134256	0.164489	1.02661	0.0378827	0.943226	0.999994	1	0.191457	0.786068	0.476439	0.344584	0.485666	0.600575
AL445231.1	ENSG00000236137	0.0914233	-1.05723	-0.0802826	0.909032	0.999994	1	0.231765	0.162767	0.36447	0.406701	0.095536	0.319297
TTF2	ENSG00000116830	4.97076	1.03499	0.0496135	0.798691	0.999994	1	13.9971	17.5969	12.4933	13.7646	11.9208	17.0966
TRIM45	ENSG00000134253	1.06318	-1.10803	-0.147993	0.68714	0.999994	1	3.63971	3.35985	1.71655	3.32183	2.1565	4.12527
MAN1A2	ENSG00000198162	9.35174	-1.02564	-0.0365292	0.852016	0.999994	1	28.5296	24.7489	28.2418	26.7511	32.1618	26.1216
TENT5C	ENSG00000183508	0.381278	-1.33858	-0.420709	0.358556	0.999994	1	0.757807	0.802971	0.976668	1.0965	1.5564	0.824219
GDAP2	ENSG00000196505	2.25682	-1.00018	-0.000265896	0.998912	0.999994	1	6.74135	7.27904	5.95163	6.27648	7.02618	6.86704
WDR3	ENSG00000065183	6.63679	-1.03531	-0.0500616	0.788274	0.999994	1	18.4558	21.6639	17.5017	19.8771	21.4028	19.0045
TBX15	ENSG00000092607	0.0580266	-1.41062	-0.496329	0.339975	0.999994	1	0.0129781	0.0607628	0.279897	0.106278	0.356647	0.0715183
WARS2	ENSG00000116874	9.32248	1.09745	0.134153	0.525311	0.999994	1	28.5035	25.4691	28.0369	24.3103	31.8795	19.9149
WARS2-AS1	ENSG00000231365	0.805455	1.01742	0.0249101	0.938237	0.999994	1	1.97115	2.22781	2.83587	2.02995	2.91241	2.13456
ZNF697	ENSG00000143067	2.05111	-1.05338	-0.0750193	0.764901	0.999994	1	5.02228	5.87615	6.48363	5.81629	6.78693	6.03643
PHGDH	ENSG00000092621	7.99822	1.1261	0.171336	0.399112	0.999994	1	28.3811	22.0109	20.4195	19.9499	22.0062	21.5454
NOTCH2	ENSG00000134250	19.9401	-1.05776	-0.0810126	0.690736	0.999994	1	61.4601	60.3795	47.9541	58.2329	56.0662	66.4874
SEC22B	ENSG00000265808	7.42069	-1.10161	-0.139613	0.436883	0.999994	1	21.1499	20.9084	18.434	24.1807	22.3916	20.7598
AC253572.1	ENSG00000286106	2.00292	1.29579	0.373829	0.322038	0.999994	1	7.40866	5.36935	4.97037	4.92721	4.68548	4.19454
NBPF26	ENSG00000273136	2.99115	1.26205	0.335769	0.0912012	0.999994	1	10.0251	8.32882	8.07503	6.97266	7.8309	6.38576
AC253572.2	ENSG00000287979	1.00607	1.45255	0.538584	0.290178	0.999994	1	1.67584	2.77634	4.24752	3.06643	0.614042	2.41531
RNVU1-19	ENSG00000275538	5.39602	-1.01414	-0.0202525	0.967929	0.999994	1	10.4652	22.7601	14.5613	21.3262	5.19517	21.9519
RNVU1-4	ENSG00000277610	18.7409	1.05683	0.0797447	0.87087	0.999994	1	48.8141	81.4393	37.3782	64.7469	20.783	71.607
FAM72B	ENSG00000188610	1.78539	1.07255	0.101043	0.758486	0.999994	1	5.37188	7.65839	3.00661	5.80598	3.24873	5.77715
SRGAP2C	ENSG00000171943	4.0352	-1.01443	-0.0206656	0.92199	0.999994	1	13.1815	12.0263	10.5052	10.5112	12.3097	13.74
LINC02798	ENSG00000227082	0.901281	-1.11517	-0.157262	0.675325	0.999994	1	1.7019	2.07285	3.36886	2.60361	3.12668	2.46599
HIST2H3PS2	ENSG00000273213	0.189171	1.23572	0.305351	0.473731	0.999994	1	0.626567	0.693386	0.371098	0.299864	0.485249	0.580702
FAM72C	ENSG00000263513	1.43615	-1.09111	-0.125799	0.737923	0.999994	1	5.12963	5.58474	1.36744	2.4693	4.80228	5.78882
LINC02802	ENSG00000232527	2.14816	-1.01262	-0.0180865	0.965245	0.999994	1	5.58631	8.17715	5.30847	5.63383	7.26995	6.58151
RNVU1-15	ENSG00000207205	2.11529	1.16612	0.221718	0.664958	0.999994	1	4.78349	7.03876	6.75484	4.79661	3.00465	8.28469
NBPF15	ENSG00000266338	2.82479	1.16868	0.224878	0.268425	0.999994	1	9.13759	8.32752	7.51422	7.32125	7.47483	6.80372
U1_3	ENSG00000275291	4.43697	1.17686	0.234937	0.625252	0.999994	1	8.35212	20.8556	10.3199	10.9922	6.88567	15.7256
U1_4	ENSG00000278099	3.22173	-1.16559	-0.221057	0.667974	0.999994	1	3.75845	10.5581	10.1323	13.5904	4.88256	10.5441
U1_5	ENSG00000277918	10.7912	-1.21237	-0.277827	0.493203	0.999994	1	29.2197	21.245	29.0376	28.553	20.783	48.1168
SRGAP2B	ENSG00000196369	1.68921	1.09188	0.126816	0.555598	0.999994	1	5.86381	4.59272	4.47754	3.95903	5.00568	4.86424
FAM72D	ENSG00000215784	1.63191	1.12473	0.169582	0.644606	0.999994	1	4.04852	7.40769	3.15718	5.63448	2.09724	5.15442
RNVU1-14	ENSG00000207501	8.51678	1.138	0.186497	0.701942	0.999994	1	20.6257	31.5457	23.1683	26.5422	9.82467	29.931
AC245014.3	ENSG00000276216	5.73924	1.12323	0.167652	0.704415	0.999994	1	7.96099	23.2766	19.1257	18.4365	9.10813	17.7273
NBPF20	ENSG00000162825	0.336717	-1.03542	-0.0502153	0.848527	0.999994	1	0.923042	0.872665	1.10684	0.958312	1.08641	1.01405
U1_8	ENSG00000270722	7.97287	-1.29329	-0.37105	0.416503	0.999994	1	22.6882	23.4983	9.88513	24.9336	12.8476	34.0986
GPR89A	ENSG00000117262	6.40321	1.0784	0.108898	0.579543	0.999994	1	19.7993	21.3783	15.6512	17.3274	17.8636	17.8774
RNF115	ENSG00000265491	2.83438	1.04075	0.0576261	0.779928	0.999994	1	9.04864	8.8788	7.18759	7.81254	8.62405	7.91649
POLR3C	ENSG00000186141	9.70321	1.00011	0.000160009	0.999516	0.999994	1	33.2611	32.4848	20.7398	28.9548	31.263	26.6691
NUDT17	ENSG00000186364	0.879865	1.54139	0.624234	0.100557	0.999994	1	2.58578	2.38944	2.75167	1.59211	2.13177	1.34995
PIAS3	ENSG00000131788	1.88879	1.0433	0.0611513	0.814675	0.999994	1	6.3814	6.51371	3.95297	6.13424	4.38413	5.6369
PEX11B	ENSG00000131779	7.5868	-1.02203	-0.0314339	0.901079	0.999994	1	24.6115	25.2277	17.1918	23.7632	20.3444	24.6298
RBM8A	ENSG00000265241	30.3921	-1.12461	-0.169428	0.372232	0.999994	1	77.1308	96.6207	69.7194	95.1925	82.9202	97.3024
LIX1L-AS1	ENSG00000234222	0.106898	-1.0794	-0.110231	0.840269	0.999994	1	0.295076	0.406332	0.187172	0.426423	0.133558	0.401736
LIX1L	ENSG00000271601	26.2869	-1.08224	-0.114027	0.579871	0.999994	1	76.7889	75.5683	65.9194	72.7288	87.4519	78.7315
ANKRD34A	ENSG00000272031	0.19238	1.35313	0.436302	0.311466	0.999994	1	0.614294	0.560838	0.524416	0.305423	0.573962	0.389297
POLR3GL	ENSG00000121851	3.74637	-1.03855	-0.0545661	0.854332	0.999994	1	13.7284	11.7475	7.18937	12.2729	9.82092	11.8369
HJV	ENSG00000168509	0.0350389	-1.40972	-0.495411	0.549352	0.999994	1	0.0932619	0.0873295	0.0419035	0.109104	0.025629	0.179878
AC239799.2	ENSG00000287190	0.27855	1.11436	0.15622	0.741151	0.999994	1	0.843777	0.731578	0.870566	0.987107	0.51528	0.723303
RNVU1-6	ENSG00000201558	9.83326	-1.12193	-0.165987	0.714601	0.999994	1	16.5005	44.0995	18.8435	36.5961	12.0919	39.7816
LINC01719	ENSG00000233396	0.330077	1.06695	0.0934978	0.858862	0.999994	1	0.916398	0.40045	1.51523	0.729003	1.75947	0.296266
NOTCH2NLA	ENSG00000264343	1.20765	1.25689	0.329859	0.223761	0.999994	1	4.21349	3.35632	3.11815	2.85493	2.43106	3.27801
AC239799.1	ENSG00000276509	0.00854298	8.44072	3.07737	0.243534	0.999994	1	0	0.0791069	0	0	0	0
U1_9	ENSG00000273768	54.6237	1.05963	0.0835598	0.77298	0.999994	1	141.286	117.17	215.311	131.505	173.821	154.201
AC245407.2	ENSG00000287978	1.73644	1.70028	0.765775	0.0800767	0.999994	1	3.37586	5.13682	6.5981	3.55437	1.76265	3.72067
U1_10	ENSG00000274428	3.25393	-1.34545	-0.428088	0.405241	0.999994	1	5.63768	8.24855	7.5992	15.2517	3.09855	10.8736
NBPF12	ENSG00000268043	3.03109	1.02938	0.0417823	0.83541	0.999994	1	8.85346	8.35562	9.41888	8.19882	10.2603	7.86088
RNVU1-8	ENSG00000286172	12.5382	-1.01419	-0.0203223	0.9677	0.999994	1	22.3908	52.0419	36.2893	41.1624	25.9311	45.8302
PRKAB2	ENSG00000131791	7.57389	1.17192	0.228873	0.303319	0.999994	1	22.1997	17.7709	26.1936	17.4064	25.5489	14.942
AC242426.2	ENSG00000237188	2.16917	1.0999	0.137378	0.711941	0.999994	1	5.65267	7.1425	6.32807	5.35403	6.67772	5.59952
CHD1L	ENSG00000131778	20.1216	1.03749	0.0530905	0.796316	0.999994	1	78.1096	63.7269	38.0696	65.0026	53.5708	54.8685
BCL9	ENSG00000116128	10.3242	-1.05338	-0.0750207	0.695686	0.999994	1	33.0193	33.0036	22.5019	32.4506	27.3099	33.7616
ACP6	ENSG00000162836	1.05047	1.14943	0.200919	0.361397	0.999994	1	3.31877	3.21331	2.76265	2.50219	2.99701	2.67337
GPR89B	ENSG00000188092	5.21221	-1.21359	-0.27928	0.146632	0.999994	1	13.7752	12.0283	12.6799	15.6092	14.4528	17.1843
LINC02804	ENSG00000274372	0.160252	1.0732	0.101915	0.85131	0.999994	1	0.41151	0.689544	0.330865	0.481411	0.428536	0.429671
RNVU1-7	ENSG00000206585	0.150598	11.0848	3.47051	0.18411	0.999994	1	1.37504	0	0	0	0	0
NBPF11	ENSG00000263956	3.38642	1.10308	0.141534	0.484703	0.999994	1	10.1055	9.48936	10.197	8.73907	11.3167	7.41819
RNU1-122P	ENSG00000202408	0.764708	3.18817	1.67273	0.0773621	0.999994	1	0.36139	3.38402	2.92277	0.845556	0	1.19491
NBPF14	ENSG00000270629	0.226003	1.04253	0.0600862	0.785753	0.999994	1	0.677369	0.625472	0.684784	0.583317	0.816973	0.533994
NOTCH2NLB	ENSG00000286019	0.0125143	-7.03438	-2.81442	0.265675	0.999994	1	0	0	0	0	0	0.112157
NUDT4B	ENSG00000177144	54.8158	1.00479	0.00688769	0.971079	0.999994	1	156.93	153.513	171.055	182.274	180.672	124.631
PDE4DIP	ENSG00000178104	0.920237	1.09882	0.135959	0.707782	0.999994	1	2.56342	1.5996	3.79277	1.99844	4.39045	1.15394
NBPF9	ENSG00000269713	1.64001	1.27946	0.355539	0.0702602	0.999994	1	5.46567	4.90791	4.1555	3.93708	4.03503	3.48935
NOTCH2NLC	ENSG00000286219	4.86124	1.09089	0.125512	0.537069	0.999994	1	16.492	13.2594	13.1892	13.1709	13.3847	13.2457
NBPF19	ENSG00000271383	2.51905	1.06688	0.0934044	0.627361	0.999994	1	8.71025	7.09684	6.49013	6.98663	6.97478	7.12878
U1_12	ENSG00000206828	29.2272	1.03346	0.0474845	0.917663	0.999994	1	49.8454	123.286	84.9504	97.3214	35.52	117.072
HIST2H2BF	ENSG00000203814	51.308	-1.08994	-0.124248	0.716718	0.999994	1	125.049	239.953	66.3067	168.742	72.7132	220.661
HIST2H3D	ENSG00000183598	434.984	-1.20268	-0.266256	0.367293	0.999994	1	1071.02	1600.68	626.425	1287.13	692.236	1942.21
HIST2H4A	ENSG00000270882	198.702	-1.04987	-0.0702137	0.780186	0.999994	1	564.189	754.068	398.485	593.51	403.373	798.119
HIST2H3C	ENSG00000203811	147.084	-1.1987	-0.261467	0.293318	0.999994	1	299.757	506.867	302.499	444.827	302.745	581.279
HIST2H2AA3	ENSG00000203812	49.091	1.25949	0.332844	0.548513	0.999994	1	205.996	217.798	24.454	22.3449	133.763	194.441
HIST2H2AA4	ENSG00000272196	270.705	-1.12443	-0.169193	0.543231	0.999994	1	627.042	911.388	632.099	925.569	461.706	1053.98
HIST2H3A	ENSG00000203852	224.201	-1.21071	-0.275854	0.230298	0.999994	1	544.772	693.101	436.617	657.781	444.762	922.422
HIST2H4B	ENSG00000270276	2.56564	1.46331	0.549237	0.128875	0.999994	1	4.82228	9.14053	8.53547	5.60723	6.29669	3.76869
AC239868.1	ENSG00000264207	1.50332	1.54755	0.629988	0.145909	0.999994	1	2.69549	2.43847	7.6772	2.83268	3.11362	2.66869
HIST2H2BE	ENSG00000184678	93.4612	1.02923	0.0415597	0.86854	0.999994	1	239.948	365.781	224.928	275.086	213.792	319.427
HIST2H2AC	ENSG00000184260	315.838	1.04024	0.0569117	0.842939	0.999994	1	826.571	1201.6	776.417	823.571	631.31	1243.02
HIST2H2AB	ENSG00000184270	195.672	1.1668	0.222556	0.536546	0.999994	1	605.466	758.891	385.217	471.007	451.921	574.574
BOLA1	ENSG00000178096	6.50236	1.2456	0.316842	0.264742	0.999994	1	20.7988	19.4397	17.2685	15.0325	15.9063	15.6933
SV2A	ENSG00000159164	5.38788	1.20664	0.270991	0.245494	0.999994	1	19.6954	12.2215	15.5287	12.3473	16.3668	11.2949
SF3B4	ENSG00000143368	80.72	-1.1551	-0.208015	0.260372	0.999994	1	202.91	250.353	176.601	260.678	220.535	250.254
MTMR11	ENSG00000014914	0.286459	1.58056	0.660434	0.15726	0.999994	1	1.27008	0.53114	0.731331	0.432765	0.853931	0.339759
OTUD7B	ENSG00000264522	13.1353	-1.10293	-0.141342	0.442733	0.999994	1	37.7997	38.2621	31.092	37.8125	44.0543	37.524
AC244033.2	ENSG00000285184	0.688651	1.36744	0.451474	0.251131	0.999994	1	2.56258	1.60463	1.90722	1.71045	1.4862	1.29954
VPS45	ENSG00000136631	5.92842	1.08204	0.11376	0.569784	0.999994	1	17.991	20.2111	14.4267	17.0324	14.4727	17.3757
PLEKHO1	ENSG00000023902	4.08039	1.17961	0.23831	0.239535	0.999994	1	11.8979	12.8373	11.3031	10.1383	9.49805	11.2104
ANP32E	ENSG00000143401	80.1255	-1.14821	-0.199383	0.489012	0.999994	1	230.308	284.235	120.8	272.412	159.663	291.475
CA14	ENSG00000118298	0.263555	-1.01464	-0.0209647	0.954407	0.999994	1	0.992068	0.768797	0.584081	0.820415	1.05291	0.527847
APH1A	ENSG00000117362	18.5346	-1.04006	-0.0566608	0.753325	0.999994	1	57.2696	54.4475	48.3565	59.0029	58.8662	50.4345
MRPS21	ENSG00000266472	52.9337	-1.04437	-0.0626297	0.732849	0.999994	1	142.746	167.058	145.13	157.669	160.082	162.627
PRPF3	ENSG00000117360	16.0735	1.08672	0.119977	0.524264	0.999994	1	43.0436	52.7712	45.9961	41.3794	46.9022	43.8324
RPRD2	ENSG00000163125	16.4274	1.00149	0.00214988	0.991947	0.999994	1	51.6798	50.5433	43.1415	48.1932	54.2122	44.3579
TARS2	ENSG00000143374	9.87175	-1.0305	-0.0433471	0.833874	0.999994	1	32.482	34.4687	19.8072	33.8421	24.837	30.6789
ECM1	ENSG00000143369	0.24705	1.51648	0.600726	0.187304	0.999994	1	0.604037	0.644172	0.904666	0.353322	0.553313	0.536285
ADAMTSL4	ENSG00000143382	0.335055	1.51264	0.597067	0.159759	0.999994	1	1.33229	1.04235	0.622239	0.687014	0.838227	0.463695
ADAMTSL4-AS1	ENSG00000203804	0.169664	1.20928	0.274144	0.563457	0.999994	1	0.365525	0.583879	0.541006	0.352154	0.449065	0.450255
MCL1	ENSG00000143384	28.8526	-1.09584	-0.132035	0.503717	0.999994	1	74.8724	80.0737	80.6918	87.3795	95.1186	79.6626
ENSA	ENSG00000143420	23.8508	1.07215	0.100506	0.584808	0.999994	1	83.0616	74.2318	54.7471	68.0305	64.9043	65.9019
GOLPH3L	ENSG00000143457	19.1782	1.01279	0.0183387	0.935982	0.999994	1	56.4276	51.0648	60.8118	49.0991	70.9302	49.5367
HORMAD1	ENSG00000143452	5.20204	1.14948	0.20098	0.48518	0.999994	1	15.1226	16.6777	14.1776	13.0977	14.0026	13.3441
CTSK	ENSG00000143387	1.28809	-1.01153	-0.0165432	0.968695	0.999994	1	2.99811	2.77846	5.36054	2.89269	5.26618	3.47466
ARNT	ENSG00000143437	14.0657	1.05822	0.0816384	0.679758	0.999994	1	47.1089	38.4386	38.6402	36.6078	48.708	33.8139
SETDB1	ENSG00000143379	15.046	1.08697	0.120308	0.571579	0.999994	1	48.4127	39.0888	44.8759	38.0025	54.9727	31.2209
CERS2	ENSG00000143418	30.0584	-1.03513	-0.0498164	0.786093	0.999994	1	88.11	84.4947	87.3809	91.19	96.426	85.389
AL590133.2	ENSG00000259357	0.837153	1.17791	0.236226	0.601393	0.999994	1	2.75362	2.51061	2.14887	1.78023	2.7879	1.75703
MINDY1	ENSG00000143409	0.969395	-1.0408	-0.0576889	0.852892	0.999994	1	2.80992	2.24138	3.24649	2.95677	3.70976	2.16293
PRUNE1	ENSG00000143363	12.0359	-1.10788	-0.147806	0.524821	0.999994	1	35.4767	35.8462	26.6309	34.9829	35.8945	38.3324
BNIPL	ENSG00000163141	0.0948889	1.01523	0.0218025	0.96686	0.999994	1	0.222014	0.304908	0.30591	0.380933	0.211505	0.244691
C1orf56	ENSG00000143443	0.466659	-1.03521	-0.0499251	0.905086	0.999994	1	1.67672	1.11498	1.26653	1.05184	2.59103	0.642777
CDC42SE1	ENSG00000197622	11.5055	1.03729	0.0528144	0.801893	0.999994	1	35.0199	27.5057	38.1897	30.2181	41.8423	27.251
MLLT11	ENSG00000213190	8.41415	-1.08169	-0.113286	0.656986	0.999994	1	23.2563	31.4024	15.9008	31.3339	14.9643	29.5961
GABPB2	ENSG00000143458	1.85774	1.08628	0.119395	0.600091	0.999994	1	5.31926	6.27927	4.85167	5.11033	4.68037	5.46362
AL592424.1	ENSG00000261168	0.0359875	1.09645	0.132836	0.879759	0.999994	1	0.183518	0.0343689	0.0989479	0.0429384	0.0806914	0.16181
SEMA6C	ENSG00000143434	0.372887	1.28222	0.358643	0.318011	0.999994	1	1.07726	1.32681	0.907002	0.896938	0.778772	0.919887
SCNM1	ENSG00000163156	7.04182	1.0531	0.0746359	0.710173	0.999994	1	20.3578	23.5901	18.4025	20.3213	20.366	19.0687
LYSMD1	ENSG00000163155	6.20394	1.10957	0.150004	0.543247	0.999994	1	19.8713	15.934	18.7455	14.5686	20.4346	15.0383
VPS72	ENSG00000163159	10.8777	1.04311	0.0608894	0.734346	0.999994	1	32.9826	36.1695	27.298	30.5025	32.6558	30.0901
PIP5K1A	ENSG00000143398	19.7163	1.05706	0.0800613	0.660474	0.999994	1	59.1826	61.6689	53.4264	54.5686	56.6625	55.3641
PSMD4	ENSG00000159352	34.55	-1.02721	-0.0387355	0.845639	0.999994	1	119.161	114.999	70.2597	114.912	96.3652	101.875
ZNF687-AS1	ENSG00000232671	0.474294	1.81835	0.862632	0.129792	0.999994	1	0.798054	1.01418	2.25389	0.600182	0.626603	1.06805
ZNF687	ENSG00000143373	9.3761	1.00901	0.0129395	0.943919	0.999994	1	29.0442	30.1351	23.8967	27.5327	25.6449	29.7412
PI4KB	ENSG00000143393	8.88087	-1.03143	-0.04465	0.815652	0.999994	1	25.9358	30.9526	20.8087	27.259	25.7607	27.5258
RFX5	ENSG00000143390	12.7248	-1.03335	-0.047332	0.806402	0.999994	1	37.4821	34.4993	38.112	35.9249	49.8498	30.1869
AL391069.2	ENSG00000237976	2.19851	1.11029	0.150936	0.695044	0.999994	1	5.9296	7.4317	6.06624	6.29652	6.81882	4.62495
SELENBP1	ENSG00000143416	5.19866	1.00581	0.00835269	0.978375	0.999994	1	21.0034	17.9361	7.81199	16.4314	14.9222	14.9439
PSMB4	ENSG00000159377	51.3009	-1.07054	-0.0983377	0.623086	0.999994	1	166.69	169.775	97.6273	177.221	132.428	154.855
POGZ	ENSG00000143442	17.4634	1.00446	0.00642196	0.972524	0.999994	1	51.079	55.3377	47.8875	48.6279	55.2692	51.4706
CGN	ENSG00000143375	0.337093	-1.17321	-0.230465	0.564612	0.999994	1	0.86065	1.00539	0.719795	1.03675	0.88985	1.127
TUFT1	ENSG00000143367	2.6379	1.05746	0.0806084	0.813353	0.999994	1	10.9468	8.09966	4.58538	7.99332	8.38958	6.00843
AL365436.2	ENSG00000232536	0.113227	1.06405	0.0895685	0.914952	0.999994	1	0.214361	0.501813	0.288943	0	0.589078	0.354383
SNX27	ENSG00000143376	5.64145	1.03383	0.0479938	0.796717	0.999994	1	16.6793	16.9072	16.1615	15.5027	17.2811	15.966
CELF3	ENSG00000159409	1.63292	1.15807	0.21172	0.53694	0.999994	1	4.44423	3.33546	6.38689	3.36874	5.53476	3.70573
RIIAD1	ENSG00000178796	0.0831431	2.58023	1.3675	0.055532	0.999994	1	0.123851	0.162362	0.42292	0.144889	0.0544561	0.0819005
MRPL9	ENSG00000143436	29.1761	-1.07694	-0.106942	0.560838	0.999994	1	85.6021	95.8728	63.1228	92.7517	83.3403	88.4533
OAZ3	ENSG00000143450	0.04869	1.23521	0.304761	0.595181	0.999994	1	0.133854	0.22789	0.0765442	0.185062	0.093632	0.0804686
TDRKH	ENSG00000182134	1.97422	1.04285	0.0605313	0.84564	0.999994	1	7.21871	6.33447	4.05927	5.7638	4.91679	6.22328
TDRKH-AS1	ENSG00000203288	0.633051	1.08289	0.114886	0.819488	0.999994	1	2.07522	1.48055	1.99804	1.38727	3.09583	0.762394
S100A4	ENSG00000196154	0.730741	-1.39283	-0.478017	0.403211	0.999994	1	2.08582	1.00447	1.6066	1.46408	2.48932	2.69296
S100A2	ENSG00000196754	0.242846	-1.15786	-0.211457	0.703639	0.999994	1	0.838724	0.887812	0.196616	0.469267	0.521102	1.20573
S100A16	ENSG00000188643	2.95194	1.3123	0.392103	0.186151	0.999994	1	12.263	9.80709	4.46749	7.01797	6.52135	6.61168
S100A13	ENSG00000189171	6.7821	-1.09088	-0.125489	0.665115	0.999994	1	19.8438	23.5605	12.9397	21.1908	16.0241	24.1419
AL162258.1	ENSG00000271853	2.4144	-1.11766	-0.160485	0.676316	0.999994	1	5.15607	6.15449	7.89196	7.49018	8.40813	6.0574
S100A1	ENSG00000160678	0.17235	1.10113	0.138991	0.794164	0.999994	1	0.632611	0.592371	0.317678	0.391802	0.368145	0.635706
AL162258.2	ENSG00000272030	3.0889	-1.14302	-0.192848	0.591621	0.999994	1	8.71862	5.86007	9.46895	8.76041	11.524	7.84058
CHTOP	ENSG00000160679	20.5727	-1.05218	-0.0733774	0.690557	0.999994	1	55.8156	65.1977	54.6332	61.2985	61.9049	63.4828
SNAPIN	ENSG00000143553	12.6246	-1.06703	-0.0936034	0.71412	0.999994	1	42.7007	42.4205	22.2416	44.6935	28.3098	41.1231
ILF2	ENSG00000143621	146.343	-1.06094	-0.0853471	0.669747	0.999994	1	431.117	492.511	322.364	455.373	402.387	468.556
INTS3	ENSG00000143624	9.56689	1.00877	0.0126042	0.946341	0.999994	1	29.1606	31.1287	24.4715	27.6239	27.6374	29.4203
SLC27A3	ENSG00000143554	0.354698	1.02693	0.0383443	0.932053	0.999994	1	1.20587	1.09056	0.852073	1.00075	1.30286	0.795148
GATAD2B	ENSG00000143614	19.582	-1.04286	-0.0605426	0.758156	0.999994	1	52.004	52.5337	62.8772	55.08	74.8023	48.4901
AL358472.5	ENSG00000284738	0.341172	1.3335	0.415217	0.420734	0.999994	1	1.2459	1.16665	0.639764	0.520547	1.02714	0.735617
DENND4B	ENSG00000198837	6.7737	1.0661	0.0923378	0.622814	0.999994	1	20.4575	19.6768	19.5691	18.1402	20.7928	17.8579
CRTC2	ENSG00000160741	6.07347	1.1515	0.203509	0.325307	0.999994	1	16.7471	16.7371	19.761	14.3552	19.5788	13.2481
SLC39A1	ENSG00000143570	9.83473	-1.21685	-0.283152	0.199805	0.999994	1	21.965	26.2239	24.2092	32.6652	31.4428	25.1988
AL358472.7	ENSG00000285779	14.3582	-1.01793	-0.0256425	0.909906	0.999994	1	39.9868	44.4492	42.0491	39.7828	37.2981	52.979
CREB3L4	ENSG00000143578	9.79898	1.13953	0.188438	0.404728	0.999994	1	32.0155	24.649	29.503	23.1587	33.3559	20.5761
JTB	ENSG00000143543	24.7988	1.0301	0.042786	0.816932	0.999994	1	65.2404	80.5753	72.7444	73.8304	68.2016	72.6587
AL358472.6	ENSG00000285641	1.06441	1.21357	0.279263	0.562424	0.999994	1	2.08191	2.93969	4.21683	1.50773	5.1582	1.23833
AL358472.2	ENSG00000272654	0.800212	-1.18675	-0.247017	0.580075	0.999994	1	2.02766	1.07964	2.85818	1.86046	3.93328	1.53366
RAB13	ENSG00000143545	8.30745	-1.0192	-0.027438	0.891263	0.999994	1	27.1988	28.3728	18.0973	24.9205	26.5334	23.995
RPS27	ENSG00000177954	513.651	1.05857	0.0821123	0.68034	0.999994	1	1562.48	1389.97	1563.6	1355.57	1871.31	1123.09
TPM3	ENSG00000143549	30.1512	-1.22207	-0.289324	0.339479	0.999994	1	79.7258	107.117	38.3536	99.8221	61.1369	111.369
C1orf43	ENSG00000143612	77.4857	1.01484	0.0212568	0.91655	0.999994	1	240.816	200.308	239.55	203.443	286.111	194.411
UBAP2L	ENSG00000143569	33.3969	-1.17268	-0.229815	0.343939	0.999994	1	82.2247	117.345	58.8382	112.19	68.5043	120.974
HAX1	ENSG00000143575	29.841	1.05789	0.0811895	0.6852	0.999994	1	103.571	90.7853	70.6437	86.3056	83.97	81.8858
AQP10	ENSG00000143595	0.794613	-1.02184	-0.031163	0.943983	0.999994	1	1.82019	1.65835	3.38184	2.07183	3.10937	2.06033
ATP8B2	ENSG00000143515	4.77188	1.06574	0.0918504	0.687075	0.999994	1	16.7755	11.435	13.8119	12.8238	16.2692	11.0216
IL6R	ENSG00000160712	1.29923	-1.63448	-0.708834	0.0691558	0.999994	1	3.32862	1.57071	2.21393	3.56698	6.04056	2.27241
UBE2Q1	ENSG00000160714	15.6844	-1.09656	-0.132981	0.495375	0.999994	1	42.841	47.9904	37.8569	48.6229	46.6336	47.0388
CHRNB2	ENSG00000160716	0.305488	1.32572	0.406773	0.36383	0.999994	1	0.757186	0.421823	1.43836	0.459723	0.927142	0.665507
ADAR	ENSG00000160710	39.7452	-1.20536	-0.269462	0.168782	0.999994	1	103.011	118.197	76.6891	124.626	108.296	127.245
PMVK	ENSG00000163344	22.1657	-1.0867	-0.11996	0.5661	0.999994	1	68.2486	66.8577	48.74	73.2596	64.5067	63.2513
PBXIP1	ENSG00000163346	4.03633	1.02375	0.0338665	0.866666	0.999994	1	14.2296	10.8021	10.6558	11.4746	12.6646	11.1169
PYGO2	ENSG00000163348	12.473	-1.08365	-0.115893	0.552158	0.999994	1	32.8352	38.9158	31.7048	39.1148	34.013	39.9028
AL451085.2	ENSG00000271380	1.46304	-1.24148	-0.312067	0.471786	0.999994	1	2.96349	4.03033	3.55073	4.95269	5.89461	2.48852
SHC1	ENSG00000160691	7.11909	1.00426	0.00613367	0.97583	0.999994	1	23.2285	23.2585	16.7665	24.8958	18.1403	20.2204
CKS1B	ENSG00000173207	30.2267	1.00286	0.00412047	0.983723	0.999994	1	91.5039	113.996	64.1493	95.7451	76.0072	97.1061
FLAD1	ENSG00000160688	5.74019	-1.01148	-0.0164645	0.943609	0.999994	1	16.4964	20.4648	14.0047	19.2986	13.7234	18.6916
ZBTB7B	ENSG00000160685	2.54928	1.2158	0.281902	0.356339	0.999994	1	7.76934	5.27539	9.17155	5.85503	8.78511	4.15871
DCST1-AS1	ENSG00000232093	0.72726	1.13759	0.185986	0.684412	0.999994	1	2.05755	2.11933	2.21874	1.84541	1.80937	2.04094
ADAM15	ENSG00000143537	2.6926	1.18843	0.249062	0.27442	0.999994	1	8.52845	7.57704	7.64075	6.77164	7.48283	6.00212
EFNA4	ENSG00000243364	2.0891	-1.01627	-0.0232783	0.948279	0.999994	1	6.18934	5.62765	6.52914	4.93207	8.13462	5.88232
EFNA3	ENSG00000143590	1.31284	1.20159	0.264946	0.494591	0.999994	1	3.45105	3.96473	4.11753	2.91769	4.39918	2.46111
EFNA1	ENSG00000169242	2.4367	-1.27961	-0.355704	0.325481	0.999994	1	5.98922	4.6329	6.36484	6.64103	9.38868	6.17046
SLC50A1	ENSG00000169241	9.56964	1.1412	0.190558	0.416258	0.999994	1	32.9106	22.4248	28.7947	24.9721	30.6412	19.4903
DPM3	ENSG00000179085	12.6717	1.03807	0.0539077	0.826007	0.999994	1	33.1735	40.9085	37.548	36.7939	38.159	34.0644
KRTCAP2	ENSG00000163463	6.84352	-1.00247	-0.00356493	0.985027	0.999994	1	20.2167	21.2901	18.9351	22.3752	19.6312	19.2609
TRIM46	ENSG00000163462	0.506196	1.19296	0.254549	0.604541	0.999994	1	1.13177	0.826856	2.38051	1.01847	2.21472	0.575706
MUC1	ENSG00000185499	0.14072	1.0812	0.112636	0.83867	0.999994	1	0.167326	0.313364	0.71959	0.265659	0.591201	0.30297
AC234582.1	ENSG00000231064	0.155954	1.00073	0.00104569	0.998345	0.999994	1	0.27434	0.299704	0.760125	0.454666	0.678515	0.251967
THBS3	ENSG00000169231	1.46507	1.08257	0.114455	0.703105	0.999994	1	5.25598	3.66554	4.01082	3.82338	5.87136	2.47304
MTX1	ENSG00000173171	6.87046	-1.11049	-0.151198	0.460553	0.999994	1	21.5154	20.8876	13.5231	21.7497	18.8484	21.6658
AC234582.2	ENSG00000236263	0.631173	-1.06333	-0.0885936	0.873755	0.999994	1	0.99255	1.58	2.67577	1.74173	3.16401	0.875143
GBA	ENSG00000177628	7.47588	-1.07981	-0.110784	0.662976	0.999994	1	26.5039	21.0121	15.0401	24.9856	19.8926	22.8408
FAM189B	ENSG00000160767	8.76863	1.00392	0.00564253	0.976473	0.999994	1	25.2232	23.1461	28.4942	23.5147	31.1242	23.4606
SCAMP3	ENSG00000116521	18.9313	-1.00286	-0.00412678	0.982608	0.999994	1	61.4558	63.9455	43.0268	61.173	52.0739	56.3084
CLK2	ENSG00000176444	18.7546	1.05854	0.0820817	0.669761	0.999994	1	57.5635	55.1575	52.7664	52.6293	59.7178	46.1512
HCN3	ENSG00000143630	2.66184	1.15466	0.207464	0.501234	0.999994	1	7.98926	6.03713	9.22201	5.75401	8.60668	6.256
FDPS	ENSG00000160752	31.5054	-1.23387	-0.303187	0.314841	0.999994	1	86.5213	108.804	37.8665	109.059	56.9873	118.204
RUSC1-AS1	ENSG00000225855	0.445592	1.29799	0.376281	0.355565	0.999994	1	1.33085	1.03599	1.52733	1.20052	0.846021	1.00731
RUSC1	ENSG00000160753	2.55635	-1.02283	-0.0325636	0.884177	0.999994	1	7.9129	7.6721	6.8774	6.961	8.54969	7.7254
ASH1L	ENSG00000116539	9.24005	1.07119	0.0992082	0.5983	0.999994	1	26.6822	27.2574	27.4187	21.973	30.395	24.8058
ASH1L-AS1	ENSG00000235919	1.68317	1.08608	0.119133	0.732095	0.999994	1	5.73561	4.80312	4.35796	4.2005	5.7409	3.90593
MSTO1	ENSG00000125459	14.2556	1.1362	0.184214	0.363247	0.999994	1	48.5661	37.2721	39.9102	39.5752	44.387	28.4245
YY1AP1	ENSG00000163374	20.5401	1.08533	0.118139	0.573164	0.999994	1	65.2037	64.2757	52.4746	53.8467	59.6785	55.6868
DAP3	ENSG00000132676	25.9042	1.03438	0.0487605	0.803554	0.999994	1	83.5576	81.6829	64.4529	75.5847	79.0441	69.3535
GON4L	ENSG00000116580	6.21863	-1.03069	-0.0436142	0.821667	0.999994	1	18.2317	18.6909	17.2088	18.5179	20.1858	17.7885
SYT11	ENSG00000132718	0.268197	1.70571	0.770375	0.15832	0.999994	1	0.83771	0.397305	1.08518	0.483641	0.657739	0.263793
RIT1	ENSG00000143622	3.36835	1.19679	0.259171	0.310941	0.999994	1	10.527	11.3216	8.06717	8.28092	9.37699	7.53993
KHDC4	ENSG00000132680	13.9213	1.1078	0.147701	0.470148	0.999994	1	33.9399	37.6996	49.8358	34.25	43.7946	34.182
ARHGEF2	ENSG00000116584	25.6245	1.65795	0.729401	0.0444932	0.999994	1	102.624	42.2729	79.7964	36.359	72.7609	30.1411
AL355388.2	ENSG00000273002	0.240646	2.07984	1.05647	0.037453	0.999994	1	0.70569	0.70975	0.704608	0.397494	0.258572	0.374482
SSR2	ENSG00000163479	24.3111	1.15129	0.203247	0.305657	0.999994	1	76.312	58.1707	78.5887	59.1724	78.0911	51.7996
UBQLN4	ENSG00000160803	28.1165	1.02417	0.0344486	0.853585	0.999994	1	76.5529	90.6983	80.7529	78.9606	81.1495	84.8359
LAMTOR2	ENSG00000116586	8.17475	1.05311	0.07466	0.811174	0.999994	1	23.4838	30.764	18.5312	23.6662	20.1686	25.4071
MEX3A	ENSG00000254726	19.7053	1.20153	0.264874	0.173896	0.999994	1	49.8333	57.7326	65.1118	43.2885	56.7151	46.533
LMNA	ENSG00000160789	9.53296	-1.01484	-0.0212473	0.940756	0.999994	1	32.2442	30.382	22.1068	30.4604	24.9836	30.8585
SEMA4A	ENSG00000196189	0.329338	1.38705	0.472016	0.210594	0.999994	1	0.932536	0.842031	1.10735	0.730542	0.896937	0.495539
SLC25A44	ENSG00000160785	3.603	-1.1129	-0.154321	0.443161	0.999994	1	8.54967	10.6117	9.83634	11.2138	10.3667	11.0928
PMF1-BGLAP	ENSG00000260238	2.49561	1.1126	0.153931	0.712676	0.999994	1	5.54251	6.71024	9.45812	4.51915	10.4003	5.18307
PMF1	ENSG00000160783	25.649	-1.08267	-0.11459	0.564537	0.999994	1	81.8806	82.1608	50.3397	79.5104	75.1521	77.9895
PAQR6	ENSG00000160781	0.826553	1.41665	0.502488	0.349036	0.999994	1	1.11373	1.20974	4.6638	1.48532	2.76678	0.957436
SMG5	ENSG00000198952	23.9212	1.04861	0.0684803	0.724124	0.999994	1	59.5974	77.1158	73.6709	64.6104	68.5023	70.3355
TMEM79	ENSG00000163472	0.912674	1.19696	0.259371	0.498036	0.999994	1	2.95644	2.15899	2.89064	2.37101	2.55487	1.88537
GLMP	ENSG00000198715	6.86342	-1.11325	-0.154777	0.51016	0.999994	1	21.8945	19.498	14.2453	21.9275	19.0501	21.2308
CCT3	ENSG00000163468	156.245	-1.04373	-0.0617443	0.741614	0.999994	1	459.856	521.65	368.514	505.199	429.916	480.872
TSACC	ENSG00000163467	0.780538	-1.16371	-0.218727	0.657488	0.999994	1	2.22474	1.65711	2.1355	1.95198	3.33476	1.83898
C1orf61	ENSG00000125462	1.23967	1.0538	0.0756034	0.782673	0.999994	1	3.32304	4.70207	2.98984	4.06989	3.65729	2.79432
MEF2D	ENSG00000116604	7.14025	1.01444	0.0206785	0.924114	0.999994	1	21.3399	20.7057	20.8596	19.7102	22.5012	20.6726
IQGAP3	ENSG00000183856	7.19263	1.03147	0.0446996	0.831157	0.999994	1	24.5091	24.1246	15.4644	20.954	17.1243	24.1094
NAXE	ENSG00000163382	19.4109	-1.06007	-0.0841546	0.722843	0.999994	1	65.6806	65.2169	35.1982	67.4887	45.5886	62.4887
GPATCH4	ENSG00000160818	7.1216	-1.04647	-0.0655302	0.774506	0.999994	1	18.5127	26.1871	16.7158	23.025	20.4615	21.0898
NES	ENSG00000132688	4.6104	-1.49815	-0.583187	0.109693	0.999994	1	10.9149	13.1408	4.09439	15.0788	8.69241	17.8438
CRABP2	ENSG00000143320	146.68	-1.09901	-0.136198	0.606732	0.999994	1	453.307	541.861	220.859	477.4	320.623	527.804
ISG20L2	ENSG00000143319	9.94471	-1.11255	-0.153874	0.432374	0.999994	1	25.7671	31.4417	23.2703	31.5102	29.4309	29.2727
RRNAD1	ENSG00000143303	4.2052	1.14652	0.197262	0.466063	0.999994	1	11.8838	10.3283	14.5318	9.28217	14.3341	9.21537
MRPL24	ENSG00000143314	13.2669	-1.06356	-0.0889081	0.670743	0.999994	1	41.1102	44.5061	27.1987	43.3853	34.9158	41.8633
HDGF	ENSG00000143321	85.799	-1.11849	-0.161546	0.459456	0.999994	1	238.044	273.897	180.817	282.303	222.397	272.268
PRCC	ENSG00000143294	25.8972	-1.02577	-0.0367059	0.849605	0.999994	1	73.438	81.812	71.3937	78.671	81.4711	75.0017
SH2D2A	ENSG00000027869	3.04392	-1.14611	-0.196748	0.628123	0.999994	1	9.85248	10.1294	4.21505	9.18936	7.401	10.9577
NTRK1	ENSG00000198400	0.16289	1.09385	0.12941	0.771889	0.999994	1	0.685944	0.52112	0.255865	0.348239	0.455251	0.527778
ARHGEF11	ENSG00000132694	4.70749	-1.00193	-0.0027766	0.987734	0.999994	1	13.5178	14.7814	13.2512	13.6107	13.9937	14.4959
ETV3L	ENSG00000253831	2.85421	-1.5823	-0.662022	0.141349	0.999994	1	5.74507	2.96633	7.21321	8.19706	11.8335	6.0064
ETV3	ENSG00000117036	8.30682	-1.07465	-0.103873	0.624771	0.999994	1	20.7284	21.0391	27.0264	23.0989	32.8843	19.7328
KIRREL1	ENSG00000183853	19.3536	-1.03516	-0.0498525	0.800309	0.999994	1	58.0956	65.2574	45.3519	59.6362	52.17	63.5559
IFI16	ENSG00000163565	0	-1.02358	-0.0336266	0.99212	0.999994	1	0	0	0	0	0	0
CADM3	ENSG00000162706	0.306037	2.28649	1.19314	0.0391623	0.999994	1	0.908595	0.891966	0.895495	0.565755	0.418832	0.209971
TAGLN2	ENSG00000158710	22.0565	-1.10949	-0.149897	0.654106	0.999994	1	74.9424	71.4065	34.365	75.7124	54.5455	69.3555
IGSF9	ENSG00000085552	3.54932	1.28588	0.362755	0.141145	0.999994	1	7.95918	8.59827	14.213	7.69141	10.3643	6.60016
PIGM	ENSG00000143315	1.9836	1.13967	0.188612	0.397815	0.999994	1	5.60724	5.61061	6.20489	4.98539	5.55608	4.99694
IGSF8	ENSG00000162729	0.896458	1.17268	0.229814	0.55193	0.999994	1	2.71879	3.11612	2.13043	2.79895	1.86487	2.15747
PEA15	ENSG00000162734	8.96083	1.11438	0.156246	0.443013	0.999994	1	26.561	32.585	20.5823	25.4083	21.4447	24.9116
DCAF8	ENSG00000132716	12.3233	1.10449	0.143378	0.481428	0.999994	1	37.3468	29.7456	40.7988	28.5911	43.6092	27.7712
PEX19	ENSG00000162735	14.9709	-1.04242	-0.0599408	0.770794	0.999994	1	52.7624	50.8736	26.7218	49.5574	37.9522	48.0255
COPA	ENSG00000122218	25.9874	1.02483	0.035386	0.859927	0.999994	1	89.2877	74.7639	66.1009	75.4329	84.1703	67.3966
NCSTN	ENSG00000162736	16.6864	1.03978	0.0562832	0.750897	0.999994	1	51.9551	48.2158	47.0435	46.6192	52.5201	44.2813
VANGL2	ENSG00000162738	7.85192	1.19295	0.25453	0.175767	0.999994	1	21.5651	22.5006	24.867	17.7387	22.3855	18.6846
F11R	ENSG00000158769	1.44182	-1.0179	-0.02559	0.928915	0.999994	1	4.45579	4.68347	3.60365	4.79566	3.83263	4.43209
AL591806.4	ENSG00000270149	0.926571	1.50014	0.585098	0.154757	0.999994	1	3.65356	2.77189	1.84528	2.15269	1.78819	1.58718
USF1	ENSG00000158773	11.6185	-1.1187	-0.161819	0.426215	0.999994	1	31.0121	34.9829	27.4343	36.4776	32.8425	36.015
NECTIN4	ENSG00000143217	0.226177	-1.4324	-0.518438	0.358552	0.999994	1	0.603222	0.290059	0.512766	0.820126	0.824369	0.413276
KLHDC9	ENSG00000162755	1.32192	1.16006	0.214194	0.589936	0.999994	1	5.4738	3.83653	2.50361	3.25932	3.20664	3.72088
PFDN2	ENSG00000143256	84.8007	-1.09207	-0.127062	0.542751	0.999994	1	227.141	296.767	178.008	303.747	206.47	257.045
NIT1	ENSG00000158793	3.2594	1.05401	0.0758872	0.756741	0.999994	1	11.4567	9.76781	7.71804	9.26546	9.35935	9.02384
DEDD	ENSG00000158796	13.4753	1.04097	0.0579325	0.780663	0.999994	1	41.748	44.9498	32.9002	38.1318	38.6852	38.8537
UFC1	ENSG00000143222	21.1914	-1.06456	-0.0902516	0.6186	0.999994	1	63.3031	65.5107	50.4201	65.5451	65.5417	61.2771
AL590714.1	ENSG00000224985	0.987355	-1.26055	-0.334054	0.567925	0.999994	1	1.04126	2.08934	3.74279	3.30637	4.74185	0.98367
USP21	ENSG00000143258	7.01769	1.10255	0.140849	0.460589	0.999994	1	19.8757	22.1878	19.8661	17.7675	20.9259	18.1915
PPOX	ENSG00000143224	2.59175	1.18551	0.245504	0.283757	0.999994	1	8.56689	7.5527	6.80845	6.42086	7.16109	5.97023
B4GALT3	ENSG00000158850	9.62467	1.02068	0.0295322	0.887381	0.999994	1	28.0725	28.0781	28.5865	28.0598	31.9891	24.279
ADAMTS4	ENSG00000158859	0.0851543	1.23977	0.310067	0.339821	0.999994	1	0.245401	0.26043	0.245025	0.197771	0.17384	0.240415
NDUFS2	ENSG00000158864	14.7874	-1.04233	-0.059818	0.768921	0.999994	1	49.2103	46.4697	32.3939	48.6627	44.9959	40.5288
TOMM40L	ENSG00000158882	4.6228	-1.14757	-0.198581	0.438382	0.999994	1	12.1285	14.8699	9.39028	14.9903	11.5431	15.3119
SDHC	ENSG00000143252	11.8548	-1.15032	-0.202035	0.286678	0.999994	1	32.3609	35.4958	25.1124	37.4062	30.7798	39.1767
AL592295.5	ENSG00000288093	0.267764	-1.19095	-0.252115	0.598454	0.999994	1	0.63277	0.846457	0.541543	0.916509	1.09302	0.431725
FCGR2A	ENSG00000143226	0.0171402	1.41226	0.498009	0.495151	0.999994	1	0.0530456	0.0397371	0.0572013	0.0124112	0.069971	0.0233855
DUSP12	ENSG00000081721	8.95329	-1.06589	-0.092063	0.652197	0.999994	1	28.0284	24.2981	23.1455	25.9397	31.3372	24.1558
AL359541.1	ENSG00000226889	0.82765	1.24318	0.314039	0.538249	0.999994	1	2.15703	1.56077	3.43616	1.26172	2.47884	2.16122
ATF6	ENSG00000118217	16.6532	1.07145	0.0995606	0.606537	0.999994	1	55.8965	44.3257	46.68	43.2504	56.6833	39.3401
NOS1AP	ENSG00000198929	0.4311	1.2583	0.33147	0.302778	0.999994	1	1.3782	0.947732	1.44489	1.00769	1.08887	0.957264
C1orf226	ENSG00000239887	0.889365	1.00299	0.00430838	0.989171	0.999994	1	2.43128	1.9951	3.31243	2.99719	3.07484	1.84403
UHMK1	ENSG00000152332	10.6438	-1.17584	-0.233698	0.241597	0.999994	1	24.4576	29.8946	26.8097	30.5805	35.2742	30.8727
UAP1	ENSG00000117143	20.2611	1.06557	0.091623	0.657262	0.999994	1	64.9884	76.6748	39.5179	61.4823	45.7435	62.3702
DDR2	ENSG00000162733	0.193226	1.19393	0.255723	0.561015	0.999994	1	0.853348	0.29965	0.547739	0.427844	0.737019	0.29111
HSD17B7	ENSG00000132196	3.30916	-1.13155	-0.178302	0.443997	0.999994	1	9.08542	10.1096	7.18886	9.345	7.69125	12.9004
RGS5	ENSG00000143248	0.581546	1.05835	0.0818159	0.809593	0.999994	1	1.57453	1.80113	1.74378	1.22468	2.05822	1.63217
AL592435.1	ENSG00000232995	0.912634	1.23861	0.308717	0.346832	0.999994	1	2.82972	2.97002	2.29136	2.23725	2.11925	2.22768
NUF2	ENSG00000143228	12.0256	1.04551	0.0642072	0.799145	0.999994	1	39.7254	47.2164	20.9306	35.6643	25.9349	40.9552
PBX1	ENSG00000185630	11.9007	1.1101	0.150692	0.453497	0.999994	1	36.4782	39.9663	29.168	30.4734	32.2294	33.0867
AL391001.1	ENSG00000269887	0.741748	1.3687	0.452801	0.380585	0.999994	1	2.99625	2.21499	1.4171	1.29139	2.42684	1.12973
MGST3	ENSG00000143198	2.42831	-1.06472	-0.0904783	0.727025	0.999994	1	7.40769	9.02792	4.28469	8.11721	5.10268	8.71991
ALDH9A1	ENSG00000143149	17.2016	1.00856	0.0123029	0.951617	0.999994	1	53.6159	66.132	34.0295	51.2195	45.7476	55.3544
TMCO1	ENSG00000143183	17.0416	-1.05397	-0.0758381	0.684161	0.999994	1	50.7331	54.6531	40.3458	52.4651	47.4771	54.5352
TMCO1-AS1	ENSG00000224358	0.382101	1.06477	0.0905362	0.833707	0.999994	1	1.57331	0.761168	1.03679	1.38042	0.893535	0.924802
UCK2	ENSG00000143179	18.7455	-1.02527	-0.0359988	0.842439	0.999994	1	52.938	60.0245	51.1763	60.6178	56.8423	52.6423
FAM78B	ENSG00000188859	2.75667	1.07639	0.1062	0.644719	0.999994	1	7.42828	6.89648	9.73782	6.54226	8.14218	8.14048
POGK	ENSG00000143157	24.2056	-1.10367	-0.142306	0.481743	0.999994	1	59.1129	68.2192	68.8497	70.2862	80.3907	69.2989
TADA1	ENSG00000152382	15.1293	-1.08145	-0.112965	0.556869	0.999994	1	45.743	48.2216	32.4058	42.8697	43.6361	50.7151
ILDR2	ENSG00000143195	5.53257	-1.35416	-0.437399	0.159426	0.999994	1	13.2716	7.23762	15.6205	12.3432	29.0125	9.38309
MAEL	ENSG00000143194	0.374311	-1.92149	-0.942225	0.109014	0.999994	1	0.573081	0.251544	0.885125	0.754232	1.96858	0.710567
DUSP27	ENSG00000198842	0.0356496	-1.27917	-0.355208	0.618569	0.999994	1	0.118716	0.0741095	0.0592669	0.0771565	0.115996	0.130841
LINC01363	ENSG00000231605	0.927041	-2.04769	-1.034	0.0767816	0.999994	1	0.906004	2.43565	0.78789	1.98305	1.38142	4.99271
AL451050.2	ENSG00000272205	0.475007	-1.06344	-0.0887437	0.874832	0.999994	1	0.991968	1.08368	1.85709	1.83741	1.0904	1.36661
POU2F1	ENSG00000143190	8.0021	-1.18508	-0.244984	0.316973	0.999994	1	22.2504	27.7899	11.4684	24.1498	18.4703	29.7594
AL136984.1	ENSG00000272033	0.402669	1.11944	0.162782	0.742868	0.999994	1	1.25083	2.06366	0.347912	0.905857	1.11306	1.21447
AL359962.3	ENSG00000287218	0.0540256	-1.03351	-0.0475479	0.94632	0.999994	1	0.232602	0.108903	0.130638	0.170071	0.159801	0.160225
CREG1	ENSG00000143162	8.73325	-1.00269	-0.00386848	0.984744	0.999994	1	28.8404	26.058	22.4322	27.2564	25.7615	25.2058
MPZL1	ENSG00000197965	15.5423	1.01163	0.0166801	0.931109	0.999994	1	46.3121	55.4567	36.4139	48.4597	37.8103	50.6557
MPC2	ENSG00000143158	6.31629	1.05223	0.0734544	0.73977	0.999994	1	20.4948	22.2529	13.5583	19.601	16.961	17.1001
DCAF6	ENSG00000143164	9.47267	1.0243	0.0346451	0.86582	0.999994	1	30.0301	32.1215	22.0609	28.4585	27.4575	26.742
GPR161	ENSG00000143147	0.663184	1.07304	0.101704	0.754799	0.999994	1	1.537	1.82021	2.42384	1.4514	2.81034	1.28433
TIPRL	ENSG00000143155	16.0111	1.01408	0.0201726	0.911349	0.999994	1	47.1046	55.0442	39.8803	48.2126	46.4491	46.4161
SFT2D2	ENSG00000213064	9.24203	-1.2471	-0.318574	0.137649	0.999994	1	23.4815	27.0801	16.4851	29.0461	22.7398	31.8625
TBX19	ENSG00000143178	0.357693	1.30156	0.380236	0.464763	0.999994	1	0.813839	0.789782	1.48926	0.623181	1.35002	0.489253
ATP1B1	ENSG00000143153	7.29353	-1.11348	-0.155072	0.506453	0.999994	1	21.3307	20.0844	17.4706	23.1355	19.8134	23.1407
NME7	ENSG00000143156	3.79019	-1.10902	-0.149286	0.444422	0.999994	1	10.6286	11.6605	8.50557	11.2229	12.3552	10.8557
BLZF1	ENSG00000117475	4.99478	-1.00803	-0.0115315	0.953629	0.999994	1	16.4408	15.16	12.6521	15.0381	14.779	15.1597
CCDC181	ENSG00000117477	1.00999	1.38788	0.472882	0.317979	0.999994	1	2.07801	0.919606	5.55087	1.34871	4.27117	0.925517
SLC19A2	ENSG00000117479	13.237	-1.17435	-0.231862	0.208556	0.999994	1	32.3611	30.8712	37.3343	39.2637	43.624	37.3893
Z99572.1	ENSG00000213062	0.305357	1.35704	0.440463	0.217869	0.999994	1	0.839238	0.613715	1.19588	0.621805	0.887371	0.50212
F5	ENSG00000198734	0.00568381	1.25643	0.32933	0.720617	0.999994	1	0.0180483	0.0281671	0.00540618	0.0140761	0.0198392	0.00663058
C1orf112	ENSG00000000460	4.5805	-1.1281	-0.173898	0.455688	0.999994	1	12.8524	15.7576	8.22292	13.8204	10.6814	16.9336
METTL18	ENSG00000171806	5.18225	1.04462	0.0629763	0.828955	0.999994	1	16.2866	16.6249	13.0272	14.3632	16.1321	13.8867
SCYL3	ENSG00000000457	1.35064	-1.04287	-0.0605531	0.806358	0.999994	1	4.47214	4.18767	3.02511	4.19695	4.08758	3.97203
KIFAP3	ENSG00000075945	7.59344	1.01889	0.0270007	0.908987	0.999994	1	25.5949	28.8981	13.566	22.987	17.1671	26.3119
GORAB-AS1	ENSG00000231407	0.0550964	1.49976	0.584731	0.304756	0.999994	1	0.159736	0.102833	0.215313	0.105114	0.142664	0.0770225
GORAB	ENSG00000120370	3.27221	1.19511	0.257142	0.24974	0.999994	1	11.1319	10.7176	7.27761	8.33813	7.29264	8.82704
Z97200.1	ENSG00000271811	0.0163514	-15.9595	-3.99634	0.0998631	0.999994	1	0	0	0	0	0.121215	0.0303839
BX284613.2	ENSG00000231424	0.106654	-1.26768	-0.342185	0.498089	0.999994	1	0.257037	0.401145	0.109073	0.384227	0.102029	0.472152
FMO4	ENSG00000076258	0.222325	1.56256	0.643911	0.173262	0.999994	1	0.820591	0.726858	0.438454	0.492964	0.390061	0.391095
PRRC2C	ENSG00000117523	45.5081	-1.07306	-0.101736	0.586365	0.999994	1	129.222	148.04	105.137	134.801	139.727	138.554
VAMP4	ENSG00000117533	3.40627	1.05476	0.0769118	0.716421	0.999994	1	11.4201	9.66665	9.03287	8.75674	11.1861	8.96012
EEF1AKNMT	ENSG00000010165	13.3864	-1.03949	-0.0558704	0.77182	0.999994	1	36.3778	46.7	32.9675	41.4726	37.4479	42.429
DNM3	ENSG00000197959	0.0823276	1.07431	0.103417	0.833803	0.999994	1	0.313509	0.260948	0.160986	0.221222	0.273506	0.191961
PIGC	ENSG00000135845	4.14825	1.06892	0.0961475	0.670954	0.999994	1	12.3004	14.1045	10.3844	11.8274	10.7337	12.0703
C1orf105	ENSG00000180999	0.0032992	3.45064	1.78687	0.52896	0.999994	1	0	0.0305502	0	0	0	0
SUCO	ENSG00000094975	11.7903	1.06887	0.0960853	0.634436	0.999994	1	33.9589	29.8996	39.3469	30.1277	43.0751	25.6207
TNFSF4	ENSG00000117586	0.410179	1.18876	0.24946	0.576603	0.999994	1	0.953128	0.719328	1.85362	0.615764	1.37609	1.08184
AL645568.1	ENSG00000203739	1.08228	-1.03714	-0.0526107	0.864845	0.999994	1	3.45524	2.74023	3.15775	2.62604	4.03063	3.19937
PRDX6	ENSG00000117592	202.018	-1.2727	-0.347889	0.0844684	0.999994	1	495.584	584.398	355.901	602.57	546.664	681.416
ANKRD45	ENSG00000183831	0.0378016	-1.32362	-0.404488	0.616083	0.999994	1	0.0410013	0.102382	0.110534	0.0159887	0.195303	0.135568
KLHL20	ENSG00000076321	6.65346	-1.07408	-0.103103	0.616262	0.999994	1	18.9295	20.9595	15.8884	20.4822	19.9172	19.9699
CENPL	ENSG00000120334	3.36346	1.10393	0.142654	0.51033	0.999994	1	10.3943	11.828	7.70126	8.84478	8.43683	9.92594
DARS2	ENSG00000117593	12.2802	-1.16843	-0.224573	0.325082	0.999994	1	33.7126	42.122	19.6913	41.2152	24.9468	44.7529
GAS5	ENSG00000234741	157.846	1.26985	0.34466	0.241284	0.999994	1	425.434	349.539	597.295	311.174	562.052	242.894
GAS5-AS1	ENSG00000270084	0.478499	-1.18391	-0.243559	0.627523	0.999994	1	1.10814	1.16736	1.36922	0.729214	2.43621	1.22133
ZBTB37	ENSG00000185278	3.10227	1.00913	0.0131155	0.945401	0.999994	1	9.4251	8.47569	9.38317	8.43731	11.0226	8.0542
RC3H1	ENSG00000135870	11.3355	-1.11905	-0.162268	0.387521	0.999994	1	31.4168	34.8497	25.0753	34.1286	31.5832	37.0446
LINC02776	ENSG00000224977	2.60869	1.61429	0.690897	0.147295	0.999994	1	5.55354	6.46095	10.5859	5.11877	5.54964	3.70956
RABGAP1L	ENSG00000152061	9.68997	1.12738	0.17298	0.467502	0.999994	1	22.5984	25.855	35.9399	23.8928	32.0363	20.9089
Z99127.4	ENSG00000287697	0.569985	1.44944	0.535493	0.275368	0.999994	1	1.46376	1.20451	2.27199	1.81618	0.390061	1.27106
CACYBP	ENSG00000116161	41.5248	-1.12155	-0.165489	0.50955	0.999994	1	102.385	162.631	71.6356	133.452	87.5201	154.24
MRPS14	ENSG00000120333	7.28225	1.16207	0.216699	0.288192	0.999994	1	24.0373	23.4037	17.2452	20.4928	16.3647	19.0909
KIAA0040	ENSG00000235750	0.138343	-1.09358	-0.129057	0.76913	0.999994	1	0.342968	0.542636	0.25506	0.456568	0.312	0.482274
TNR	ENSG00000116147	0.00468303	3.78133	1.91889	0.0950336	0.999994	1	0.0176095	0.0164894	0.00791212	0	0.00483922	0.00485203
COP1	ENSG00000143207	16.1215	1.1617	0.216242	0.246089	0.999994	1	52.4897	52.639	38.096	39.2215	43.3664	41.5325
PAPPA2	ENSG00000116183	0.889419	-1.06712	-0.0937266	0.799053	0.999994	1	1.84208	1.33837	4.10818	1.82298	4.01569	2.29182
ASTN1	ENSG00000152092	0.00890852	-1.0809	-0.112235	0.89236	0.999994	1	0.0122545	0.0401625	0.0220243	0.0143361	0.0471467	0.0202593
AL136114.1	ENSG00000227579	0.529817	-1.40548	-0.491063	0.240649	0.999994	1	1.45979	0.789358	1.12704	1.46723	1.78545	1.56358
RASAL2-AS1	ENSG00000224687	0.123616	1.17543	0.233186	0.618026	0.999994	1	0.336103	0.314723	0.429198	0.289723	0.233339	0.409425
RASAL2	ENSG00000075391	3.42043	1.01383	0.0198193	0.916861	0.999994	1	9.43128	9.45652	11.1023	8.86695	12.7001	8.63246
C1orf220	ENSG00000213057	0.176097	1.85084	0.888179	0.0624759	0.999994	1	0.650111	0.513639	0.401639	0.451573	0.200987	0.201519
AL449106.1	ENSG00000273062	0.0747658	-1.2926	-0.370275	0.55328	0.999994	1	0.199312	0.0533239	0.255865	0.266478	0.125194	0.282432
RALGPS2	ENSG00000116191	6.1613	-1.18082	-0.239783	0.300211	0.999994	1	17.1686	16.249	13.5237	16.9087	22.1807	16.9792
ANGPTL1	ENSG00000116194	0.0346237	1.91716	0.93897	0.216249	0.999994	1	0.125351	0.161395	0.0281608	0.128314	0	0.0345387
FAM20B	ENSG00000116199	15.361	-1.0394	-0.0557567	0.781044	0.999994	1	50.8846	51.0793	31.766	48.5323	39.7799	50.7995
TOR3A	ENSG00000186283	4.83519	-1.04637	-0.0653959	0.777618	0.999994	1	15.1609	16.7018	9.94684	17.1634	10.0145	16.4974
ABL2	ENSG00000143322	6.55544	-1.10516	-0.144255	0.432084	0.999994	1	16.7114	18.9887	17.4882	18.2183	21.4851	19.8628
SOAT1	ENSG00000057252	6.06397	-1.31706	-0.397325	0.076363	0.999994	1	14.4302	17.1749	10.0816	19.4706	11.9784	23.3107
TOR1AIP2	ENSG00000169905	8.8066	-1.18499	-0.244877	0.293759	0.999994	1	21.2921	27.6818	18.119	26.9075	23.5625	29.3196
AL353708.3	ENSG00000272906	0.691576	1.5675	0.648468	0.19003	0.999994	1	1.25409	1.9216	2.81736	1.66717	1.31587	0.942393
TOR1AIP1	ENSG00000143337	5.11734	-1.02482	-0.0353714	0.847108	0.999994	1	15.8957	15.3678	13.6045	14.5694	17.4279	14.5273
CEP350	ENSG00000135837	12.7756	-1.02705	-0.0384997	0.833716	0.999994	1	37.6188	40.2047	33.9791	34.3988	43.7286	38.0409
QSOX1	ENSG00000116260	1.09583	1.16667	0.222392	0.431242	0.999994	1	3.56761	3.38621	2.75808	2.94358	2.84602	2.60571
LHX4	ENSG00000121454	0.0923199	2.64375	1.40259	0.0552433	0.999994	1	0.0463244	0.694044	0.0999073	0.108387	0.132395	0.0714784
ACBD6	ENSG00000230124	8.01453	-1.01333	-0.0191063	0.918819	0.999994	1	24.2408	24.3995	22.1407	22.7044	28.3621	21.6298
XPR1	ENSG00000143324	9.68394	-1.01495	-0.0214143	0.9062	0.999994	1	30.8671	30.2186	24.7026	29.7097	30.4467	27.7109
KIAA1614	ENSG00000135835	2.41279	-1.13401	-0.18143	0.468941	0.999994	1	7.44895	7.56101	4.27509	7.72359	5.97061	8.14439
AL162431.1	ENSG00000243155	0.251284	-1.19077	-0.251892	0.5955	0.999994	1	0.325609	0.631572	0.898695	0.89788	0.766968	0.615199
KIAA1614-AS1	ENSG00000232586	0.572942	1.15127	0.203225	0.652914	0.999994	1	2.27073	1.75969	1.09063	1.74044	1.3341	1.38078
STX6	ENSG00000135823	6.98666	-1.01894	-0.0270698	0.881888	0.999994	1	20.8639	22.3731	18.4045	21.5059	21.7669	20.1553
MR1	ENSG00000153029	0.255249	1.29625	0.374344	0.429156	0.999994	1	0.790047	0.463076	0.964668	0.437431	1.01429	0.319051
IER5	ENSG00000162783	4.26895	1.11645	0.158917	0.587152	0.999994	1	11.058	8.4445	17.4378	10.9739	15.135	8.09044
GLUL	ENSG00000135821	159.895	-1.05364	-0.0753807	0.715403	0.999994	1	555.304	552.777	270.695	510.883	456.131	482.751
RNASEL	ENSG00000135828	0.562709	1.04265	0.0602524	0.867729	0.999994	1	2.16303	1.90477	0.976006	1.57211	1.4266	1.82601
RGS16	ENSG00000143333	5.47304	1.2482	0.319844	0.193123	0.999994	1	17.4656	13.0442	17.4832	12.7908	18.684	7.89591
LINC01686	ENSG00000261504	0.140932	1.0214	0.0305434	0.961803	0.999994	1	0.53263	0.345288	0.368178	0.335519	0.76563	0.135469
NPL	ENSG00000135838	1.05043	-1.07314	-0.10184	0.694277	0.999994	1	3.02565	4.08531	1.78206	3.47332	2.13006	3.88423
AL355999.1	ENSG00000287808	2.14308	1.27011	0.344954	0.424013	0.999994	1	7.27261	6.17651	5.52208	4.74864	6.07316	4.28732
DHX9	ENSG00000135829	59.2434	-1.12956	-0.175758	0.480728	0.999994	1	160.518	224.186	92.776	204.1	125.55	205.632
LAMC1	ENSG00000135862	12.429	-1.04745	-0.0668866	0.741077	0.999994	1	46.6781	38.0085	22.8594	38.56	35.3879	38.748
LAMC2	ENSG00000058085	0.00176299	5.96721	2.57706	0.337953	0.999994	1	0	0.00779774	0.00748321	0	0	0
SMG7-AS1	ENSG00000232860	0.0812481	2.76929	1.46951	0.0426676	0.999994	1	0.0501573	0.187867	0.450723	0.0880161	0.0827015	0.0829206
SMG7	ENSG00000116698	16.9109	-1.01813	-0.0259212	0.888588	0.999994	1	50.3372	53.8126	45.1304	47.2942	60.1231	46.4389
ARPC5	ENSG00000162704	6.8673	-1.23875	-0.308885	0.165073	0.999994	1	17.5695	21.5624	11.1645	22.6285	14.8265	24.609
RGL1	ENSG00000143344	0.195965	-1.2084	-0.273097	0.495239	0.999994	1	0.435712	0.467703	0.544335	0.522157	0.747624	0.515353
COLGALT2	ENSG00000198756	0.31439	1.00796	0.0114372	0.971308	0.999994	1	1.14111	0.777726	0.856686	0.701272	1.52427	0.581074
TSEN15	ENSG00000198860	3.90623	-1.014	-0.0200619	0.932173	0.999994	1	13.6063	12.9686	8.25227	12.5866	9.26192	13.4605
AL445228.2	ENSG00000271387	0.11571	-1.10183	-0.139896	0.837483	0.999994	1	0.236877	0.22181	0.478941	0.346394	0.650956	0.065268
C1orf21	ENSG00000116667	0.573298	1.02463	0.0351053	0.911299	0.999994	1	1.36334	1.01364	2.55578	1.49337	2.5875	0.934194
EDEM3	ENSG00000116406	9.30879	1.12095	0.164725	0.405163	0.999994	1	26.9729	22.2287	32.1314	23.0227	31.0571	20.2306
NIBAN1	ENSG00000135842	0.999641	2.02541	1.01822	0.163757	0.999994	1	4.18935	1.14074	3.39364	1.29848	2.68566	0.477389
RNF2	ENSG00000121481	35.4321	-1.04553	-0.0642337	0.718565	0.999994	1	102.766	107.176	94.3706	106.934	108.997	105.69
TRMT1L	ENSG00000121486	5.16216	1.01782	0.0254885	0.917291	0.999994	1	19.4692	18.1878	8.66005	14.3879	12.3589	18.5369
SWT1	ENSG00000116668	5.45273	1.3426	0.425034	0.0576634	0.999994	1	16.076	16.974	15.1062	10.3113	15.3252	10.7377
IVNS1ABP	ENSG00000116679	25.3564	-1.03528	-0.0500269	0.793064	0.999994	1	71.9086	82.1196	66.2207	79.5327	72.0542	78.3141
AL078644.2	ENSG00000273004	0.805296	1.17075	0.227435	0.640398	0.999994	1	2.32404	2.10601	2.62738	1.49097	2.63706	1.98304
HMCN1	ENSG00000143341	0.0607633	-1.16477	-0.220051	0.61811	0.999994	1	0.168478	0.171847	0.129769	0.16542	0.214959	0.172423
TPR	ENSG00000047410	31.8244	1.02719	0.0386981	0.844797	0.999994	1	102.615	107.561	72.8908	94.5082	85.4046	96.7044
ODR4	ENSG00000157181	7.22716	1.16238	0.217082	0.241793	0.999994	1	20.4302	24.2762	19.2421	16.711	19.3231	19.5116
AL096803.2	ENSG00000229739	0.134108	1.13159	0.178348	0.659383	0.999994	1	0.290137	0.386391	0.492476	0.346964	0.411061	0.298453
PTGS2	ENSG00000073756	0.135614	1.69065	0.757577	0.149767	0.999994	1	0.503269	0.471256	0.240557	0.263062	0.0706222	0.377649
ERVMER61-1	ENSG00000230426	0.00172061	-10.0432	-3.32814	0.183233	0.999994	1	0	0	0	0	0	0.0154207
AL390957.1	ENSG00000285280	0.0477942	1.4489	0.534955	0.340895	0.999994	1	0.0614127	0.151607	0.200679	0.078376	0.135013	0.0799918
RGS2	ENSG00000116741	1.64002	1.36032	0.443944	0.231526	0.999994	1	4.59007	6.82638	3.25125	4.0747	2.31501	4.3447
UCHL5	ENSG00000116750	12.9731	-1.08475	-0.117365	0.639531	0.999994	1	39.2632	45.5707	23.6764	43.9524	29.1574	44.1784
RO60	ENSG00000116747	24.9224	-1.01447	-0.0207303	0.913447	0.999994	1	76.9777	77.3359	66.1458	73.8298	77.3038	74.7506
GLRX2	ENSG00000023572	3.91064	-1.06958	-0.0970457	0.6385	0.999994	1	12.51	12.8534	7.72565	12.5853	10.0591	12.7672
CDC73	ENSG00000134371	9.38103	-1.09357	-0.12904	0.4872	0.999994	1	27.9664	28.487	20.8857	30.7265	25.96	28.3344
B3GALT2	ENSG00000162630	0.0040374	-1.15447	-0.207235	0.884078	0.999994	1	0	0.014879	0.0142788	0.0185889	0	0.0175127
ASPM	ENSG00000066279	14.8772	1.02122	0.0302908	0.919363	0.999994	1	43.1214	66.3569	24.2837	38.9978	27.8778	62.7229
ZBTB41	ENSG00000177888	6.43597	-1.07529	-0.104726	0.592048	0.999994	1	19.0622	20.2728	14.6505	17.3626	20.1214	20.9585
CRB1	ENSG00000134376	0.0180323	-1.48201	-0.567554	0.266818	0.999994	1	0.0487497	0.00414989	0.0557549	0.0622153	0.0779448	0.0244223
DENND1B	ENSG00000213047	1.08233	1.01159	0.0166311	0.937319	0.999994	1	3.13845	3.59055	2.85097	3.16704	2.54868	3.81197
C1orf53	ENSG00000203724	2.0752	1.008	0.0114894	0.977363	0.999994	1	7.00222	8.06991	3.54952	6.09123	5.32872	7.02483
NEK7	ENSG00000151414	6.13776	1.09434	0.130058	0.483684	0.999994	1	18.1617	19.9877	16.1719	16.3009	18.4754	15.3914
MIR181A1HG	ENSG00000229989	4.02212	1.00004	5.96924e-05	0.999789	0.999994	1	12.4759	12.309	10.7788	12.2217	12.0355	11.664
ZNF281	ENSG00000162702	17.8425	-1.10293	-0.141343	0.485183	0.999994	1	44.3528	56.6624	44.4515	53.5037	52.438	55.9153
KIF14	ENSG00000118193	8.41617	-1.01399	-0.0200454	0.946435	0.999994	1	28.4589	35.5581	11.8562	25.3542	16.1597	34.475
DDX59	ENSG00000118197	5.2008	1.20232	0.265819	0.179934	0.999994	1	17.0792	15.9928	13.0272	12.2186	13.5465	12.9061
CAMSAP2	ENSG00000118200	12.4441	-1.06753	-0.0942722	0.600655	0.999994	1	37.297	34.5105	32.7927	36.2883	42.9024	33.9638
INAVA	ENSG00000163362	0.386189	1.29802	0.376311	0.294364	0.999994	1	1.41443	1.25527	0.7778	0.975532	0.754188	0.930689
KIF21B	ENSG00000116852	20.0064	1.0089	0.0127901	0.946915	0.999994	1	62.4692	65.304	49.6689	56.671	55.3353	64.9683
AL358473.1	ENSG00000229191	3.62394	1.2298	0.298427	0.317629	0.999994	1	10.8479	9.91707	11.0912	8.19717	9.02713	9.06875
CACNA1S	ENSG00000081248	0.093411	-1.07053	-0.0983235	0.826997	0.999994	1	0.391182	0.226757	0.175762	0.21792	0.409523	0.225834
TMEM9	ENSG00000116857	9.08432	1.12355	0.168059	0.357229	0.999994	1	31.0152	26.1057	23.3076	23.0559	26.5342	22.72
PKP1	ENSG00000081277	0.00213377	-6.96728	-2.8006	0.271954	0.999994	1	0	0	0	0	0.0199552	0
TNNT2	ENSG00000118194	0.00995547	1.12982	0.176099	0.804123	0.999994	1	0.0153573	0.0215707	0.0483014	0.0269491	0.0253219	0.0253889
LAD1	ENSG00000159166	0	-1.02361	-0.0336629	0.992167	0.999994	1	0	0	0	0	0	0
TNNI1	ENSG00000159173	0.113237	-1.99815	-0.998666	0.0619424	0.999994	1	0.232281	0.0982283	0.175066	0.227909	0.527132	0.280781
PHLDA3	ENSG00000174307	4.57472	1.08039	0.111548	0.683823	0.999994	1	12.7774	9.94607	17.0746	12.3853	15.8797	9.59905
IPO9-AS1	ENSG00000231871	0.202422	-1.16794	-0.223971	0.700201	0.999994	1	0.531022	0.331496	0.676014	0.672994	0.729643	0.438945
IPO9	ENSG00000198700	18.7015	-1.11413	-0.155912	0.421071	0.999994	1	55.1455	57.0436	39.3578	60.1414	49.2842	59.969
LMOD1	ENSG00000163431	0.0753467	1.73631	0.796025	0.175343	0.999994	1	0.170537	0.146382	0.332038	0.066502	0.0781082	0.234945
TIMM17A	ENSG00000134375	18.3714	-1.09362	-0.129112	0.499325	0.999994	1	52.4993	58.2897	40.743	59.1962	49.9977	57.2764
RNPEP	ENSG00000176393	12.5582	1.02786	0.0396483	0.872829	0.999994	1	48.7239	45.8538	18.4463	42.0536	27.73	39.2953
ARL8A	ENSG00000143862	21.32	1.01915	0.0273653	0.882714	0.999994	1	64.9975	65.9683	57.5102	64.6176	63.4144	58.8947
UBE2T	ENSG00000077152	16.1593	1.01877	0.0268306	0.928818	0.999994	1	53.6126	64.6143	26.8947	48.3072	31.5107	61.4205
PPP1R12B	ENSG00000077157	1.4351	1.24761	0.319163	0.10516	0.999994	1	4.04851	4.32218	4.26566	2.74845	3.7002	3.82207
KDM5B	ENSG00000117139	3.18881	1.37191	0.456185	0.0361512	0.999994	1	11.9149	8.41975	7.91962	6.22024	9.75226	4.93826
PCAT6	ENSG00000228288	0.628592	1.40789	0.493533	0.437621	0.999994	1	1.39358	1.42357	2.61845	0.592839	2.71558	0.698148
RABIF	ENSG00000183155	6.25448	-1.09107	-0.125739	0.67571	0.999994	1	17.1173	18.8043	15.6256	17.7201	17.3853	21.5949
KLHL12	ENSG00000117153	11.985	-1.01479	-0.0211755	0.915136	0.999994	1	43.9701	38.2687	24.623	38.3537	33.4587	36.8241
ADIPOR1	ENSG00000159346	24.2682	-1.07044	-0.098199	0.593839	0.999994	1	68.3476	75.6164	60.0189	72.9661	70.7501	76.4065
CYB5R1	ENSG00000159348	3.31327	1.00589	0.00847538	0.97194	0.999994	1	11.9025	11.1219	6.57076	10.7257	9.58172	9.16476
TMEM183A	ENSG00000163444	27.0752	-1.13951	-0.188412	0.300453	0.999994	1	68.0487	73.9828	70.8606	82.7112	83.8404	79.2308
PPFIA4	ENSG00000143847	0.215574	1.53576	0.618949	0.114183	0.999994	1	0.319432	1.19645	0.417524	0.414459	0.478812	0.364861
MYOG	ENSG00000122180	0.871567	-1.63608	-0.710242	0.0887877	0.999994	1	2.54388	1.71649	0.605112	2.53835	2.22059	3.13356
MYBPH	ENSG00000133055	0.00339632	3.49266	1.80433	0.521638	0.999994	1	0.0310104	0	0	0	0	0
LINC01136	ENSG00000233791	0.116882	1.4972	0.582271	0.268909	0.999994	1	0.248265	0.406827	0.371826	0.169421	0.204675	0.319226
BTG2	ENSG00000159388	7.42271	-1.01251	-0.0179404	0.936988	0.999994	1	22.473	16.7735	25.5971	24.0418	26.1416	16.9931
PRELP	ENSG00000188783	0.175771	-1.60007	-0.678132	0.160001	0.999994	1	0.293171	0.338578	0.351266	0.320106	0.386715	0.883183
LAX1	ENSG00000122188	0.064927	-1.17145	-0.228292	0.711353	0.999994	1	0.202794	0.142421	0.151862	0.217472	0.204341	0.167631
ZC3H11A	ENSG00000058673	13.4542	-1.05779	-0.0810585	0.686951	0.999994	1	32.4041	43.5839	38.0573	38.027	44.2823	39.9475
ZBED6	ENSG00000257315	11.5056	1.08818	0.121919	0.551375	0.999994	1	39.7858	30.1407	31.6364	27.9857	37.3484	29.3675
SNRPE	ENSG00000182004	48.9655	-1.15595	-0.209073	0.260478	0.999994	1	131.672	148.753	101.785	160.159	133.953	149.602
SOX13	ENSG00000143842	0.455365	1.39324	0.478446	0.311969	0.999994	1	2.11223	1.44427	0.553041	1.19107	0.92706	0.812279
ETNK2	ENSG00000143845	1.99291	-1.06539	-0.0913761	0.793379	0.999994	1	6.37097	6.64416	3.91775	6.76632	5.08072	6.19562
PLEKHA6	ENSG00000143850	0.0152927	1.70965	0.773698	0.280422	0.999994	1	0.0350312	0.0164014	0.0786992	0	0.051343	0.0257395
PPP1R15B	ENSG00000158615	48.5103	-1.02858	-0.0406569	0.837292	0.999994	1	124.546	139.801	156.521	139.444	170.111	131.678
PIK3C2B	ENSG00000133056	1.74833	1.13823	0.186798	0.599558	0.999994	1	4.8388	3.359	6.95288	3.52396	7.85335	2.44871
MDM4	ENSG00000198625	20.9542	-1.01495	-0.0214142	0.916737	0.999994	1	56.8173	58.5167	68.3569	55.6422	77.4187	57.2075
LRRN2	ENSG00000170382	8.55252	1.15883	0.212668	0.395203	0.999994	1	22.8343	23.7307	28.3511	21.6674	25.863	18.446
AL512306.2	ENSG00000240219	0.109898	1.55667	0.638464	0.29283	0.999994	1	0.0762192	0.237903	0.616429	0.0891663	0.363057	0.168008
NFASC	ENSG00000163531	4.12787	1.18983	0.250761	0.533309	0.999994	1	7.73389	7.22953	20.316	7.87558	13.3492	9.70688
TMEM81	ENSG00000174529	1.58069	-1.02925	-0.041596	0.927897	0.999994	1	3.0474	4.35959	6.19954	3.36699	7.16482	3.91843
RBBP5	ENSG00000117222	12.8846	-1.09835	-0.135341	0.498999	0.999994	1	34.6915	41.1034	29.932	37.095	35.7276	43.9771
DSTYK	ENSG00000133059	3.8068	-1.01855	-0.0265227	0.889538	0.999994	1	10.5902	10.5706	12.2185	9.91441	13.8566	10.8801
TMCC2	ENSG00000133069	7.57242	-1.08362	-0.115853	0.529264	0.999994	1	19.3571	21.7437	21.4584	22.3507	23.9709	22.4442
NUAK2	ENSG00000163545	0.90898	-1.17925	-0.237875	0.541045	0.999994	1	2.218	2.71238	2.00801	2.67221	2.29253	3.26547
LEMD1	ENSG00000186007	2.63918	-1.21772	-0.284187	0.578053	0.999994	1	3.3577	4.25977	11.2905	5.13182	13.5729	5.49129
BLACAT1	ENSG00000281406	3.10059	-1.24261	-0.313373	0.291613	0.999994	1	5.46933	7.57626	9.15983	8.69122	8.00071	11.3913
LEMD1-DT	ENSG00000224717	0.543521	-1.40685	-0.49247	0.295372	0.999994	1	0.664406	1.68345	1.12386	1.12018	1.9762	1.85221
CDK18	ENSG00000117266	2.68463	-1.08114	-0.112554	0.694638	0.999994	1	6.17331	5.98928	9.81929	6.63299	11.3491	6.52187
MFSD4A	ENSG00000174514	9.49149	1.22429	0.291939	0.409442	0.999994	1	19.3278	24.7268	38.2279	18.0888	28.6415	22.4824
ELK4	ENSG00000158711	5.73091	1.03822	0.05411	0.790315	0.999994	1	14.5051	17.3085	18.4712	15.7252	19.3946	14.2314
SLC45A3	ENSG00000158715	1.17682	1.02214	0.0315906	0.909363	0.999994	1	3.02019	4.74159	2.714	3.63869	2.3619	4.25606
NUCKS1	ENSG00000069275	181.454	-1.25169	-0.323874	0.110687	0.999994	1	461.881	543.657	307.597	594.235	447.846	600.184
RAB29	ENSG00000117280	4.53074	-1.05925	-0.0830382	0.732851	0.999994	1	13.9065	13.2518	11.3157	13.5826	12.1751	15.295
SLC41A1	ENSG00000133065	5.02791	1.11821	0.161193	0.455827	0.999994	1	14.0191	13.5494	16.4899	11.4886	17.2757	11.4957
AC119673.2	ENSG00000286619	0.738847	-1.00479	-0.00689811	0.984856	0.999994	1	1.70126	2.36414	2.41515	1.90555	2.49675	2.2241
FAM72A	ENSG00000196550	1.78929	1.34729	0.430063	0.122328	0.999994	1	6.09519	5.27488	4.48626	3.574	2.83399	5.40377
SRGAP2	ENSG00000266028	2.36489	1.15819	0.211876	0.260763	0.999994	1	7.82296	7.88242	5.33764	5.28833	6.56527	6.41745
RASSF5	ENSG00000266094	0.0171796	1.05587	0.0784335	0.90716	0.999994	1	0.0080827	0.068117	0.0726327	0.0472784	0.0444237	0.0534496
EIF2D	ENSG00000143486	7.77195	-1.10991	-0.150443	0.41106	0.999994	1	23.9318	20.0665	18.8928	23.6961	26.0069	20.93
AL591846.2	ENSG00000237605	0.193261	1.79642	0.845122	0.223617	0.999994	1	0.420723	0.562801	0.702129	0.351564	0.198202	0.397453
DYRK3	ENSG00000143479	2.65249	-1.20212	-0.26558	0.33462	0.999994	1	6.13837	6.71016	6.88648	7.92924	8.97059	7.21115
MAPKAPK2	ENSG00000162889	12.9127	-1.155	-0.207899	0.294812	0.999994	1	32.4419	31.9639	35.5173	36.6477	41.7769	38.8807
PFKFB2	ENSG00000123836	1.08545	1.10099	0.138797	0.556797	0.999994	1	3.70638	3.56918	2.38968	3.03323	2.78309	2.99807
YOD1	ENSG00000180667	6.11843	-1.00428	-0.00616057	0.978166	0.999994	1	13.6252	20.6435	19.4768	18.3063	20.4701	16.1031
CD46	ENSG00000117335	9.25963	1.05429	0.0762649	0.711334	0.999994	1	26.531	24.1705	30.4212	25.2059	31.5548	21.8058
MIR29B2CHG	ENSG00000203709	0.27972	1.03844	0.054421	0.855707	0.999994	1	0.760894	0.866972	0.835027	0.823186	0.951123	0.634524
C1orf74	ENSG00000162757	0.878209	1.02016	0.0287983	0.926992	0.999994	1	2.86458	2.88523	2.05501	2.70347	2.57992	2.4143
IRF6	ENSG00000117595	0.120998	1.20505	0.269087	0.612954	0.999994	1	0.351575	0.276113	0.428038	0.185747	0.523593	0.187493
UTP25	ENSG00000117597	7.70262	1.07406	0.103077	0.694112	0.999994	1	19.8031	22.7622	24.9925	18.9986	28.3158	16.9497
SYT14	ENSG00000143469	0.601664	1.18871	0.249392	0.533874	0.999994	1	2.67827	1.40126	1.27587	1.65155	1.98634	0.915779
HHAT	ENSG00000054392	0.648783	1.12309	0.167476	0.601548	0.999994	1	2.35009	1.46972	1.89075	1.65752	2.30351	1.21559
RNU5A-8P	ENSG00000200972	1.16621	-1.31922	-0.399687	0.581887	0.999994	1	3.46173	4.16769	0.444397	2.31415	1.08721	7.08559
KCNH1	ENSG00000143473	3.47248	-1.34155	-0.4239	0.19491	0.999994	1	6.08826	5.88958	10.8541	8.43519	16.5855	6.75451
AL590132.1	ENSG00000284299	0.413387	-1.4327	-0.518733	0.250342	0.999994	1	0.751368	0.794357	1.02368	0.93571	2.10478	0.747972
KCNH1-IT1	ENSG00000234233	1.40908	-1.11306	-0.154532	0.742298	0.999994	1	4.23276	3.20455	3.88457	5.05713	4.35579	3.37475
RCOR3	ENSG00000117625	4.96814	1.02204	0.0314447	0.867053	0.999994	1	14.9809	14.2834	14.5041	13.6012	16.2221	13.6339
TRAF5	ENSG00000082512	3.25325	1.08356	0.115785	0.555559	0.999994	1	9.38572	10.3744	8.97888	8.94779	8.09154	9.72454
LINC00467	ENSG00000153363	0.898691	1.34601	0.428693	0.188265	0.999994	1	3.62202	2.93535	1.50335	2.10914	1.96393	1.90648
RD3	ENSG00000198570	6.86545	-1.01893	-0.0270539	0.913369	0.999994	1	17.18	21.9528	21.2098	15.7694	20.381	26.1591
SLC30A1	ENSG00000170385	11.6933	1.16635	0.222004	0.391467	0.999994	1	27.0356	30.0369	44.6005	28.8637	40.1713	20.7082
NEK2	ENSG00000117650	11.0641	1.35341	0.436595	0.0638073	0.999994	1	37.9974	41.3285	19.8226	22.503	20.5636	29.9132
LPGAT1	ENSG00000123684	5.91877	1.1262	0.171458	0.386618	0.999994	1	19.5042	16.1315	16.5816	15.2916	17.2447	14.4629
INTS7	ENSG00000143493	15.9043	-1.06856	-0.095662	0.61663	0.999994	1	47.8875	50.164	36.203	47.9852	43.8079	52.3587
DTL	ENSG00000143476	38.3009	-1.17751	-0.235735	0.320863	0.999994	1	110.097	125.891	59.6966	124.646	81.6336	139.832
PPP2R5A	ENSG00000066027	30.5527	1.58545	0.664888	0.0452404	0.999994	1	104.959	54.3308	107.183	40.0706	99.3706	34.3619
PACC1	ENSG00000065600	4.86776	1.12015	0.163694	0.467249	0.999994	1	15.3808	13.3698	14.1344	12.0409	13.1641	13.5827
NENF	ENSG00000117691	19.1783	1.08309	0.115153	0.564601	0.999994	1	63.1117	54.7119	51.6633	54.1089	51.5281	52.4511
AC092803.1	ENSG00000260805	0.912434	1.2108	0.275958	0.569781	0.999994	1	2.82033	2.00154	3.14799	2.39641	2.83911	1.50512
ATF3	ENSG00000162772	2.09872	1.57152	0.652163	0.251061	0.999994	1	6.72615	3.10995	8.33905	3.24869	6.58058	2.18396
BATF3	ENSG00000123685	0.236104	-1.22862	-0.29704	0.568248	0.999994	1	0.548626	0.410982	0.749369	0.641819	1.18201	0.338611
NSL1	ENSG00000117697	5.16325	-1.14007	-0.189122	0.368925	0.999994	1	13.8919	16.8114	10.2587	15.6715	13.1119	17.968
TATDN3	ENSG00000203705	3.10739	-1.05559	-0.0780533	0.746151	0.999994	1	10.2811	10.8438	5.58391	10.2598	8.0258	9.85259
FLVCR1-DT	ENSG00000198468	0.145539	-1.19051	-0.251584	0.580627	0.999994	1	0.224451	0.370895	0.486444	0.417035	0.377341	0.523856
FLVCR1	ENSG00000162769	3.91054	1.04024	0.0569156	0.77407	0.999994	1	9.39321	13.3086	11.7384	10.4753	9.27346	13.6906
VASH2	ENSG00000143494	0.780694	-1.08834	-0.122124	0.68174	0.999994	1	2.12825	2.73075	1.62812	2.61316	1.49369	2.94058
ANGEL2	ENSG00000174606	5.35414	-1.01631	-0.0233353	0.898964	0.999994	1	15.9569	17.7123	13.7437	16.45	15.5245	16.5847
RPS6KC1	ENSG00000136643	5.44106	1.11935	0.162657	0.493725	0.999994	1	16.7555	16.5594	14.7704	14.2645	15.4352	13.7498
PROX1-AS1	ENSG00000230461	0.101666	-1.02	-0.0285698	0.94577	0.999994	1	0.268383	0.220538	0.393754	0.281934	0.445531	0.199209
PROX1	ENSG00000117707	1.5866	1.52516	0.608961	0.0960368	0.999994	1	5.4257	3.83997	4.69422	2.48727	5.63814	1.27942
AC011700.1	ENSG00000274895	0.181942	1.73316	0.793404	0.178404	0.999994	1	0.879882	0.22105	0.501406	0.301272	0.518981	0.118263
SMYD2	ENSG00000143499	6.82439	-1.12892	-0.174941	0.391693	0.999994	1	17.8967	22.7295	13.9995	21.7326	17.8219	22.2538
PTPN14	ENSG00000152104	2.26237	-1.00872	-0.0125272	0.946895	0.999994	1	7.54617	6.32013	6.12194	6.37305	8.15286	5.91463
CENPF	ENSG00000117724	51.1308	1.00022	0.000312465	0.998893	0.999994	1	163.953	204.727	89.917	148.055	121.234	186.656
KCNK2	ENSG00000082482	2.84495	-1.08831	-0.122084	0.728921	0.999994	1	9.96327	10.5311	3.3947	10.3569	6.14955	9.20109
KCTD3	ENSG00000136636	37.7033	-1.03996	-0.0565285	0.766602	0.999994	1	119.957	125.963	81.7124	116.526	111.96	113.57
USH2A	ENSG00000042781	0.282294	-1.08381	-0.116108	0.570928	0.999994	1	0.789676	0.767687	0.778609	0.760223	0.919272	0.885443
GPATCH2	ENSG00000092978	3.35368	-1.08583	-0.118797	0.536305	0.999994	1	9.80744	10.5092	7.52957	9.97394	9.79928	10.6475
SPATA17	ENSG00000162814	0.399377	-1.01934	-0.027632	0.936837	0.999994	1	1.23743	1.32078	0.979789	0.981961	1.53144	1.12539
RRP15	ENSG00000067533	10.5197	-1.11229	-0.153527	0.444158	0.999994	1	25.823	32.618	26.5301	33.5419	29.8801	31.955
TGFB2	ENSG00000092969	0.121769	-1.06865	-0.0957933	0.792591	0.999994	1	0.30751	0.296675	0.410315	0.348844	0.430212	0.328649
TGFB2-OT1	ENSG00000281453	0	-1.02359	-0.0336446	0.992147	0.999994	1	0	0	0	0	0	0
LYPLAL1-DT	ENSG00000228063	0.0595923	1.12578	0.170919	0.758231	0.999994	1	0.102243	0.134035	0.275633	0.155494	0.247255	0.0676117
LYPLAL1	ENSG00000143353	2.98738	1.13435	0.181862	0.44619	0.999994	1	10.1405	9.36985	7.02816	7.80407	7.90178	7.8382
AC096642.1	ENSG00000277007	0.192435	-1.28778	-0.364884	0.528316	0.999994	1	0.366643	0.464493	0.5039	0.403693	0.80605	0.546713
ZC3H11B	ENSG00000215817	0.0708097	1.36734	0.451373	0.389039	0.999994	1	0.181678	0.180754	0.255092	0.132837	0.187224	0.137661
SLC30A10	ENSG00000196660	6.75483	1.19757	0.260113	0.341557	0.999994	1	19.5707	23.7512	16.6296	16.8484	19.182	14.4731
EPRS	ENSG00000136628	93.942	1.06813	0.0950859	0.628717	0.999994	1	326.018	286.972	221.395	269.662	270.761	246.253
BPNT1	ENSG00000162813	5.66377	-1.06107	-0.0855204	0.715124	0.999994	1	16.281	19.858	12.0917	20.8263	13.4772	16.926
IARS2	ENSG00000067704	38.2548	-1.04815	-0.0678484	0.725303	0.999994	1	114.199	134.051	81.8667	116.451	101.342	128.763
RAB3GAP2	ENSG00000118873	10.4383	-1.01516	-0.0217026	0.91426	0.999994	1	34.9664	30.3076	27.1062	29.4727	37.3875	28.0789
MARK1	ENSG00000116141	7.4652	1.00571	0.00821293	0.965568	0.999994	1	23.2397	21.7712	20.8743	21.6354	23.5323	21.1629
C1orf115	ENSG00000162817	3.04739	1.13031	0.176716	0.526993	0.999994	1	9.84791	10.4632	6.81676	8.73751	6.55937	8.74749
MARC2	ENSG00000117791	2.02464	1.01708	0.02443	0.935392	0.999994	1	5.38369	6.7081	5.77426	5.96806	5.96563	5.83788
MARC1	ENSG00000186205	0.680686	-1.12335	-0.167801	0.442756	0.999994	1	2.08023	1.81457	1.55778	2.04973	1.95318	2.16989
AL445423.3	ENSG00000286231	2.48219	1.14294	0.192744	0.51358	0.999994	1	5.54099	10.1681	6.31596	5.22058	7.11277	7.09062
HLX	ENSG00000136630	29.2964	1.02871	0.0408321	0.830629	0.999994	1	83.6288	81.3665	92.2326	82.5677	101.868	70.3808
DUSP10	ENSG00000143507	12.3512	-1.11341	-0.154984	0.701152	0.999994	1	33.2238	24.4813	40.6437	33.5949	60.4585	19.012
AL513314.2	ENSG00000276997	3.15595	1.19086	0.252008	0.391225	0.999994	1	9.30147	9.17521	9.31556	6.60364	9.40492	7.62994
TAF1A	ENSG00000143498	4.4002	1.15038	0.202105	0.363654	0.999994	1	12.1685	14.8457	11.8987	10.6995	12.5614	10.9397
TAF1A-AS1	ENSG00000225265	0.381812	1.43012	0.516133	0.20898	0.999994	1	1.32153	1.09737	0.963484	0.67091	0.767443	0.934363
MIA3	ENSG00000154305	11.0822	1.06168	0.0863486	0.653682	0.999994	1	34.5034	31.8356	31.4095	30.421	35.4617	27.5096
AL592148.3	ENSG00000272750	0.410829	-1.27533	-0.350874	0.397347	0.999994	1	0.95879	0.917752	1.01476	1.02195	1.54576	1.17413
AIDA	ENSG00000186063	17.0112	1.00627	0.00902227	0.961409	0.999994	1	54.1521	59.1276	38.1516	48.7637	47.4008	54.8234
BROX	ENSG00000162819	13.2837	-1.08212	-0.113861	0.549687	0.999994	1	38.2185	45.5081	27.3246	39.2674	36.7097	44.4304
AL392172.1	ENSG00000228106	0.986539	-1.0725	-0.100979	0.804556	0.999994	1	2.29734	3.82915	2.14702	3.76262	2.32328	2.83583
DISP1	ENSG00000154309	0.820603	-1.09481	-0.130684	0.737006	0.999994	1	2.17881	1.98137	2.52271	2.31609	2.72894	2.4129
TLR5	ENSG00000187554	0.0830807	1.16108	0.215472	0.662749	0.999994	1	0.269746	0.28672	0.183437	0.204692	0.144249	0.289262
CAPN2	ENSG00000162909	7.23841	1.02313	0.032988	0.860212	0.999994	1	23.2403	25.476	15.7797	22.1944	20.0819	20.9457
TP53BP2	ENSG00000143514	51.5661	-1.05171	-0.0727409	0.702783	0.999994	1	142.559	164.765	133.572	147.129	155.399	165.444
AC138393.3	ENSG00000278467	2.837	1.21386	0.279604	0.497286	0.999994	1	7.9695	5.89634	10.7865	5.52489	10.4907	4.87972
FBXO28	ENSG00000143756	14.7715	-1.13414	-0.181599	0.355795	0.999994	1	37.4222	45.5122	34.3352	43.9214	40.7238	49.2436
DEGS1	ENSG00000143753	18.582	-1.02685	-0.0382274	0.838339	0.999994	1	52.3894	63.5388	47.016	58.5653	50.3419	59.4679
NVL	ENSG00000143748	10.0101	-1.00881	-0.0126522	0.945392	0.999994	1	31.9082	31.8117	25.0288	30.6687	30.0791	29.4856
CNIH4	ENSG00000143771	12.3862	-1.00389	-0.00560635	0.975718	0.999994	1	37.3593	33.3442	38.1403	35.2961	38.047	37.6107
WDR26	ENSG00000162923	9.89432	1.00831	0.0119442	0.950415	0.999994	1	30.6231	29.5841	27.1861	29.5396	30.9065	27.2521
CNIH3	ENSG00000143786	0.244463	1.19691	0.259317	0.577284	0.999994	1	0.770345	0.630139	0.747945	0.517931	0.89545	0.419634
DNAH14	ENSG00000185842	1.40373	1.14793	0.199034	0.336539	0.999994	1	4.20257	3.75564	4.37077	3.2486	4.5063	3.1899
LBR	ENSG00000143815	21.3168	-1.15414	-0.206819	0.380719	0.999994	1	56.4459	72.8253	38.2577	71.1973	40.5796	80.6451
ENAH	ENSG00000154380	58.2243	1.00297	0.00427337	0.982335	0.999994	1	173.53	189.957	151.997	165.804	188.953	164.445
SRP9	ENSG00000143742	69.7393	-1.13726	-0.185565	0.420311	0.999994	1	185.993	243.503	126.767	228.46	140.579	260.828
EPHX1	ENSG00000143819	6.93454	-1.02933	-0.041709	0.875792	0.999994	1	28.1435	22.6907	10.4837	24.4564	15.0727	23.1396
AL591895.1	ENSG00000242861	1.39586	1.09746	0.134173	0.778044	0.999994	1	3.40205	3.33734	5.3864	3.79042	4.8081	2.67824
TMEM63A	ENSG00000196187	1.86113	1.08922	0.123291	0.547361	0.999994	1	5.79565	5.06995	5.51645	5.00226	5.6702	4.5986
PYCR2	ENSG00000143811	9.92256	1.12983	0.176107	0.329955	0.999994	1	29.0179	31.2318	27.3982	26.1653	26.237	26.0305
LEFTY2	ENSG00000143768	0.29241	1.10561	0.144844	0.815558	0.999994	1	1.57835	0.854443	0.221616	0.721275	0.867486	0.788241
SDE2	ENSG00000143751	7.23227	-1.06967	-0.0971688	0.648981	0.999994	1	18.665	24.4159	17.7766	23.2747	22.4911	19.8857
AL512343.2	ENSG00000272562	0.383221	1.08741	0.120895	0.799053	0.999994	1	0.840899	1.19823	1.31417	0.769884	1.64774	0.725313
H3F3A	ENSG00000163041	212.059	-1.08283	-0.114808	0.567778	0.999994	1	643.086	713.007	417.139	702.471	524.788	692.023
LINC01703	ENSG00000225518	1.11143	1.36272	0.446486	0.261778	0.999994	1	3.73981	2.45462	3.54912	1.75821	3.80355	1.73347
ACBD3	ENSG00000182827	12.9705	1.04667	0.0658127	0.741814	0.999994	1	38.9093	40.641	35.1058	33.7761	43.4091	33.7597
MIXL1	ENSG00000185155	4.02613	-1.43013	-0.516144	0.163298	0.999994	1	8.66908	11.2138	5.66787	11.3444	8.15488	16.8736
LIN9	ENSG00000183814	20.3524	-1.12806	-0.173848	0.38215	0.999994	1	59.6132	65.6615	38.1728	58.6483	49.987	75.5917
PARP1	ENSG00000143799	46.4347	-1.09521	-0.131204	0.545498	0.999994	1	143.308	156.447	84.7341	155.614	109.689	154.737
STUM	ENSG00000203685	0.0831144	-1.1165	-0.158984	0.743784	0.999994	1	0.179704	0.262506	0.22608	0.168184	0.410875	0.182214
PSEN2	ENSG00000143801	3.38603	1.00215	0.00310231	0.990548	0.999994	1	9.63237	11.8312	8.55997	11.8926	8.69504	9.54116
COQ8A	ENSG00000163050	8.36226	1.0554	0.0777947	0.685497	0.999994	1	24.9383	25.2206	23.6251	23.8792	26.3319	20.648
CDC42BPA	ENSG00000143776	6.21046	1.11108	0.151963	0.407231	0.999994	1	18.692	19.5463	16.678	15.612	17.2311	17.091
ZNF678	ENSG00000181450	3.11295	1.03383	0.0480059	0.820809	0.999994	1	10.1118	9.70543	7.77962	8.80365	9.63453	8.4961
SNAP47	ENSG00000143740	3.80387	-1.00814	-0.0116978	0.953774	0.999994	1	11.6695	12.3954	9.64721	10.5245	12.0081	11.7471
JMJD4	ENSG00000081692	4.20085	-1.15052	-0.20228	0.363066	0.999994	1	13	11.5736	8.37115	14.23	12.6814	11.203
AL731702.1	ENSG00000286389	0.0597132	-1.03498	-0.0496005	0.925152	0.999994	1	0.262952	0.110801	0.153591	0.138428	0.216783	0.188376
WNT9A	ENSG00000143816	0.117123	1.00532	0.00765333	0.987049	0.999994	1	0.408222	0.382255	0.25299	0.395226	0.324942	0.325802
LINC02809	ENSG00000276255	0.119297	-1.34576	-0.428425	0.475948	0.999994	1	0.298742	0.139869	0.345157	0.474305	0.42221	0.188146
ARF1	ENSG00000143761	69.9047	-1.07266	-0.101195	0.598331	0.999994	1	210.953	214.654	161.727	215.811	202.591	215.589
C1orf35	ENSG00000143793	3.1686	-1.04191	-0.0592336	0.78476	0.999994	1	10.2337	9.15382	7.94964	10.288	9.29277	9.15873
MRPL55	ENSG00000162910	6.80872	-1.07564	-0.105195	0.691981	0.999994	1	17.6364	24.5759	14.962	22.6256	17.5464	21.4804
GUK1	ENSG00000143774	7.01879	-1.08816	-0.121897	0.545419	0.999994	1	22.1093	21.9654	14.2495	21.6634	17.5617	24.3149
GJC2	ENSG00000198835	0.0558405	1.67685	0.745757	0.31191	0.999994	1	0.0260401	0.170686	0.280802	0.0913903	0.114496	0.0860995
IBA57	ENSG00000181873	1.87839	1.04437	0.0626329	0.777349	0.999994	1	5.45031	6.40919	4.78881	5.03515	5.59132	5.44821
OBSCN-AS1	ENSG00000162913	0.523534	-1.13402	-0.181452	0.651926	0.999994	1	1.41599	0.970518	1.71844	1.3662	2.05393	1.35146
OBSCN	ENSG00000154358	0.568777	1.28065	0.356873	0.0773948	0.999994	1	1.74195	1.32814	1.90609	1.2524	1.49643	1.2176
AL353593.1	ENSG00000269934	0.415968	-1.03573	-0.0506434	0.875534	0.999994	1	1.32797	1.14339	1.13266	1.3034	1.25563	1.21554
TRIM11	ENSG00000154370	2.08826	-1.0434	-0.0612936	0.794421	0.999994	1	5.69879	5.16836	6.94743	6.24723	7.68797	5.073
TRIM17	ENSG00000162931	0.203176	1.45367	0.539701	0.30722	0.999994	1	0.682298	0.312019	0.769972	0.315566	0.540698	0.384738
HIST3H2A	ENSG00000181218	71.3849	1.08931	0.123411	0.58517	0.999994	1	182.925	191.816	248.948	149.077	213.61	221.881
HIST3H2BB	ENSG00000196890	9.17347	-1.06148	-0.0860823	0.756227	0.999994	1	24.3727	32.8267	20.8731	27.3132	21.2337	34.4319
RNF187	ENSG00000168159	23.9687	1.01578	0.0225902	0.93691	0.999994	1	80.1363	59.7754	70.9947	67.0247	78.571	65.4199
RHOU	ENSG00000116574	2.86775	-1.30471	-0.383729	0.162788	0.999994	1	6.1851	6.75029	6.73355	7.38545	12.8318	5.98629
AL162595.1	ENSG00000177788	1.88505	1.12218	0.166299	0.601651	0.999994	1	5.55034	3.97363	6.89122	4.59429	6.84955	3.60819
RAB4A	ENSG00000168118	20.0718	-1.00743	-0.0106834	0.95415	0.999994	1	57.7735	56.0762	62.4772	55.3729	72.6428	52.8993
CCSAP	ENSG00000154429	6.82471	-1.06436	-0.0899888	0.645103	0.999994	1	18.0925	18.0806	21.0677	18.0563	24.6517	19.4042
ACTA1	ENSG00000143632	0.199813	1.49684	0.581915	0.311742	0.999994	1	0.565654	0.388427	0.779405	0.22058	0.580331	0.374058
NUP133	ENSG00000069248	23.3243	-1.03252	-0.0461751	0.800129	0.999994	1	71.1826	73.7906	58.3842	67.2874	73.395	71.1167
ABCB10	ENSG00000135776	10.7313	-1.31434	-0.394342	0.0676457	0.999994	1	23.4463	32.2582	18.2086	35.8355	22.0558	39.0456
TAF5L	ENSG00000135801	7.52836	-1.03127	-0.0444288	0.847281	0.999994	1	20.4247	26.3542	18.994	22.5982	20.2672	25.3502
URB2	ENSG00000135763	9.13908	-1.11423	-0.15605	0.443551	0.999994	1	19.4669	28.7356	25.301	26.4518	26.0239	30.3984
LINC01736	ENSG00000228058	0.0771524	-3.57035	-1.83607	0.0514177	0.999994	1	0.0475353	0	0.128148	0.27805	0.156756	0.261953
GALNT2	ENSG00000143641	6.39522	-1.06205	-0.0868496	0.659435	0.999994	1	19.7377	16.901	17.3229	21.0295	20.1534	16.8793
COG2	ENSG00000135775	3.906	1.02389	0.0340636	0.850071	0.999994	1	11.1147	13.0409	10.4044	10.9721	11.7816	11.336
C1orf198	ENSG00000119280	11.181	-1.10139	-0.139325	0.467934	0.999994	1	30.3021	36.4247	24.8546	33.3664	33.2609	34.8178
AL118511.1	ENSG00000223393	0.165393	1.18511	0.245022	0.629282	0.999994	1	0.435006	0.407336	0.599388	0.30534	0.541928	0.38355
[truncated: 14,078 more rows]
