# Supplementary material for: Drug Resistance in Medulloblastoma Is Driven by YB-1, ABCB1 and a Seven-Gene Drug Signature
Source: Cancers (Basel). 2023 Feb 8;15(4):1086. doi: 10.3390/cancers15041086 (PMC9954169; doi:10.3390/cancers15041086)
Supplement: Supplementary file 1 [file cancers-15-01086-s001.zip › Supplementary data file S2_WTS_YBX1 knockdown lines_Processed Data_KD-HD-MB03 v NS-HD-MB03.xlsx]

## Sheet: Expression Browser view
Name	Identifier	HDMB-03_Knockdown vs. HDMB-03_Non-Silencing - Max group means	HDMB-03_Knockdown vs. HDMB-03_Non-Silencing - Fold change	HDMB-03_Knockdown vs. HDMB-03_Non-Silencing - Log fold change	HDMB-03_Knockdown vs. HDMB-03_Non-Silencing - P-value	HDMB-03_Knockdown vs. HDMB-03_Non-Silencing - FDR p-value	HDMB-03_Knockdown vs. HDMB-03_Non-Silencing - Bonferroni	HDMB-03_Knockdown - 30394-001 - TPM	HDMB-03_Knockdown - 30394-002 - TPM	HDMB-03_Knockdown - 30394-003 - TPM	HDMB-03_Non-Silencing - 30394-004 - TPM	HDMB-03_Non-Silencing - 30394-005 - TPM	HDMB-03_Non-Silencing - 30394-006 - TPM
YBX1	ENSG00000065978	161.606	-4.4262	-2.14607	8.94346e-16	1.7615e-11	2.93176e-11	177.856	76.0015	51.8109	606.285	382.491	406.532
PTPRZ1	ENSG00000106278	3.71853	2.65045	1.40624	4.8073e-11	4.73423e-07	1.57588e-06	12.1569	7.91292	10.6036	4.18898	4.93177	3.26761
TTN	ENSG00000155657	1.49693	-2.80088	-1.48588	6.16158e-09	4.04528e-05	0.000201983	1.37214	1.50498	1.35161	6.33741	2.84642	3.79682
HIST1H2AJ	ENSG00000276368	1.79036	-11.4417	-3.51623	5.06904e-08	0.00019968	0.00166168	1.36961	0	0	1.72066	10.2178	3.06158
CYFIP1	ENSG00000273749	0.621302	3.45363	1.78811	4.50871e-08	0.00019968	0.001478	3.73583	0.806963	0.936103	0.590238	0.420391	0.578758
UTRN	ENSG00000152818	1.23618	2.61294	1.38567	2.19788e-07	0.000721491	0.00720487	5.59293	2.25913	2.66721	1.75022	0.696257	1.73549
WT1	ENSG00000184937	0.25333	3.44158	1.78307	9.86409e-07	0.00242854	0.0323355	0.94012	0.425871	0.746764	0.199876	0.133593	0.316749
AC005899.4	ENSG00000265794	2.96754	-9.51546	-3.25027	9.72277e-07	0.00242854	0.0318722	0	2.2985	0	7.3045	10.0695	7.98887
LDLRAD4	ENSG00000168675	0.0982668	3.8449	1.94295	3.52503e-06	0.00715494	0.115554	0.240367	0.0928602	0.460295	0.0825238	0.0505606	0.0922151
RASSF2	ENSG00000101265	5.53446	2.77448	1.47222	3.63269e-06	0.00715494	0.119083	17.7483	12.6119	15.2222	7.2779	3.661	6.68913
GPX3	ENSG00000211445	1.7069	3.93122	1.97498	5.49159e-06	0.00983295	0.18002	6.6255	1.15724	6.51003	1.31437	1.00086	1.51069
HECW2	ENSG00000138411	0.385159	1.95928	0.970327	6.67779e-06	0.0109605	0.218905	1.63434	0.738095	0.882613	0.729127	0.614407	0.402541
GBP1	ENSG00000117228	0.660419	-5.06821	-2.34147	9.77769e-06	0.014814	0.320523	0.109017	0.548714	0.348705	0.589979	1.61692	3.45407
NPIPA3	ENSG00000224712	0.761838	80.5796	6.33234	1.13153e-05	0.0159191	0.370928	1.25943	0.392419	4.37375	0	0	0.0699449
NIBAN1	ENSG00000135842	0.285004	-9.75672	-3.2864	1.67135e-05	0.0219459	0.547885	0.00636302	0.17081	0.0457942	0.061492	0.678147	1.70066
KALRN	ENSG00000160145	0.0657197	2.62234	1.39086	2.59872e-05	0.0311931	0.851885	0.177474	0.194269	0.162687	0.0941212	0.0538216	0.0736221
TNC	ENSG00000041982	13.8395	-2.42685	-1.27908	2.83611e-05	0.0311931	0.929705	14.2257	18.8808	12.8048	34.3771	20.8391	64.6349
COLEC12	ENSG00000158270	0.548059	3.35758	1.74742	2.85071e-05	0.0311931	0.93449	3.18327	0.968849	0.658028	0.627816	0.435936	0.38585
AP001781.2	ENSG00000258529	0.126502	10.0874	3.33448	3.3052e-05	0.0342627	1	0.744527	0	0.367354	0.045926	0	0.0615833
RBP7	ENSG00000162444	1.97872	2.53296	1.34082	8.61683e-05	0.0728025	1	9.46939	4.28135	3.19609	3.80309	1.20144	1.97213
CADM3	ENSG00000162706	0.13357	6.35248	2.66732	8.87114e-05	0.0728025	1	0.799124	0.312069	0.0661062	0.02663	0.0856571	0.066954
GPX1	ENSG00000233276	40.787	1.81638	0.861065	8.83356e-05	0.0728025	1	106.232	111.217	113.397	55.8125	79.6251	61.7476
FYTTD1	ENSG00000122068	0.197793	-2.16272	-1.11285	8.21877e-05	0.0728025	1	0.369155	0.236481	0.144916	0.454046	0.643797	0.59362
SELENOW	ENSG00000178980	5.65185	1.76321	0.818204	7.94875e-05	0.0728025	1	14.0388	14.4034	17.2593	9.50668	8.67402	10.032
C2CD4A	ENSG00000198535	6.1143	2.50088	1.32244	0.000102395	0.0806712	1	11.647	12.2099	24.8405	9.66468	4.9876	7.04305
AC083843.2	ENSG00000254028	24.9184	-2.53135	-1.33991	0.000134086	0.0986759	1	27.9691	28.3858	21.7167	38.3719	110.285	62.3149
DLEU7	ENSG00000186047	2.89538	-1.80707	-0.853656	0.000135269	0.0986759	1	4.66124	5.12478	3.07793	8.03321	7.33876	9.54098
DRP2	ENSG00000102385	0.0854903	-3.93883	-1.97777	0.000203204	0.14294	1	0.0712158	0.0651727	0.0362399	0.181442	0.373746	0.16989
NUPR1	ENSG00000176046	0.352132	-4.00598	-2.00215	0.000211308	0.143514	1	0.0560493	0.431006	0.186751	0.117359	1.11174	1.77041
PCBP3	ENSG00000183570	0.426082	2.24269	1.16523	0.000219542	0.144137	1	1.90963	0.638178	1.0739	0.900225	0.475711	0.324417
TAGLN3	ENSG00000144834	0.256903	4.52566	2.17813	0.00024451	0.155351	1	0.988419	0.544141	0.617499	0.268651	0.137164	0.0900602
EPPK1	ENSG00000261150	0.33506	-3.7351	-1.90115	0.000274605	0.169019	1	0.158992	0.288981	0.267523	0.380922	0.50599	2.00559
ARHGDIG	ENSG00000242173	0.276585	3.11101	1.63738	0.000295	0.176071	1	1.29068	0.336849	0.733941	0.221744	0.280207	0.278758
GEM	ENSG00000164949	0.086174	-28.9726	-4.85662	0.000307732	0.178267	1	0	0	0.0160065	0.0386879	0.231107	0.466898
ZNF385B	ENSG00000144331	0.746312	1.8765	0.908046	0.000335843	0.184141	1	1.41879	2.07669	2.44906	1.48458	1.18186	0.855879
PDE6H	ENSG00000139053	1.31961	2.54729	1.34897	0.000345919	0.184141	1	3.42667	4.77056	2.50696	1.47961	1.42454	1.62976
ADGRL1	ENSG00000072071	0.641397	1.98518	0.98927	0.000337617	0.184141	1	3.36622	0.97447	1.21357	0.983778	0.654509	1.20789
DPP4	ENSG00000197635	2.39943	2.25358	1.17222	0.000358241	0.185682	1	6.18644	8.18375	5.08295	2.96738	3.2101	3.17147
KITLG	ENSG00000049130	0.118882	-2.103	-1.07245	0.000383992	0.193926	1	0.145216	0.157649	0.143447	0.280673	0.371742	0.365292
ASDURF	ENSG00000286053	1.50048	-465.789	-8.86353	0.000437728	0.20661	1	0	0	0	0	7.0779	5.55333
HIST1H2BB	ENSG00000276410	4.61028	-9.19362	-3.20063	0.000440578	0.20661	1	0.556472	2.56748	0.556235	1.20999	35.7076	1.08167
CRYAB	ENSG00000109846	1.19708	1.81047	0.856363	0.000436766	0.20661	1	3.72043	2.24955	3.86373	2.20627	1.8345	1.80794
EPHA7	ENSG00000135333	0.0581545	-3.34282	-1.74106	0.000472795	0.206937	1	0.0922672	0.0297698	0.0227022	0.0960257	0.258444	0.13796
AC023509.1	ENSG00000257379	3.71097	2.71535	1.44114	0.000462361	0.206937	1	17.6455	8.15128	5.96251	4.62994	1.82785	5.57445
SEMA6B	ENSG00000167680	0.919985	2.92333	1.54761	0.000454845	0.206937	1	6.34119	0.891771	1.04777	1.25429	0.494021	1.04519
NEB	ENSG00000183091	11.4302	-1.88227	-0.91247	0.000515853	0.220875	1	13.3589	13.7842	20.6178	46.1386	18.5869	34.5351
AL591846.2	ENSG00000237605	0.722029	-4.22036	-2.07737	0.000560845	0.233075	1	0.45206	0.663643	0.225933	0.873737	3.51304	1.7025
XIRP2	ENSG00000163092	2.2909	-2.01337	-1.00961	0.000568014	0.233075	1	2.39373	3.21556	3.32276	8.81509	4.11065	6.93686
ARNTL2	ENSG00000029153	0.244699	2.39207	1.25826	0.000583112	0.234387	1	0.69832	0.65585	0.643394	0.286079	0.310101	0.302462
SAT1	ENSG00000130066	2.04669	-2.16559	-1.11476	0.000597257	0.235272	1	3.3101	2.01139	2.32456	3.50645	7.85835	6.04233
BICDL2	ENSG00000162069	0.0492106	-16.7034	-4.06207	0.000681542	0.263209	1	0.0112583	0.00944437	0	0.0217599	0.259971	0.131303
PLK2	ENSG00000145632	2.55379	-2.04791	-1.03415	0.000714464	0.270617	1	3.29635	3.30108	3.31091	3.61547	9.73505	8.35849
TRIM71	ENSG00000206557	0.0482565	3.49031	1.80335	0.000781287	0.273346	1	0.16442	0.13282	0.102262	0.0294249	0.0324504	0.0591848
CXCL8	ENSG00000169429	0.284812	-3.74316	-1.90426	0.000826032	0.273346	1	0.118365	0.278025	0.189304	0.983735	0.798946	0.667226
PCDH10	ENSG00000138650	0.560455	-2.9567	-1.56399	0.000802919	0.273346	1	0.723586	0.458528	0.362159	0.528226	2.57057	1.63417
C1QTNF3-AMACR	ENSG00000273294	0.0710758	31.0565	4.95682	0.000738814	0.273346	1	0.433444	0.19479	0	0	0	0.0150451
SLC29A4	ENSG00000164638	10.5819	1.76425	0.819054	0.000819587	0.273346	1	38.7474	25.7863	23.6251	13.2134	13.2937	25.7705
FABP5	ENSG00000164687	14.0329	1.88946	0.917975	0.00079041	0.273346	1	45.9052	29.4948	40.3593	31.2879	19.6804	15.2595
ACTA2	ENSG00000107796	3.69801	-2.7963	-1.48352	0.000780722	0.273346	1	2.70719	2.51007	5.31238	9.84525	3.8438	18.4524
MIR133A1HG	ENSG00000265142	0.92168	-3.37115	-1.75324	0.000846573	0.273346	1	0.263882	0.877832	0.916828	5.12668	1.36577	1.54764
AC004997.1	ENSG00000248751	0.286022	3.86188	1.9493	0.000844436	0.273346	1	1.21108	0.670096	0.535738	0.323722	0.274622	0.050087
LINC00881	ENSG00000241135	0.0589877	-12.4322	-3.63601	0.000861063	0.27354	1	0.025674	0.0107687	0	0.0372169	0.285025	0.174667
RPE65	ENSG00000116745	1.36484	-3.54124	-1.82426	0.000983499	0.291287	1	0.610411	1.21188	1.23657	0.924174	2.47571	8.34514
MYL1	ENSG00000168530	2.93559	-3.00434	-1.58705	0.000990392	0.291287	1	2.75813	2.28021	2.68503	16.6107	4.01165	5.01159
NCOA7	ENSG00000111912	1.84843	-2.12334	-1.08633	0.00094772	0.291287	1	1.58728	3.08173	2.14503	2.11	6.57458	7.04644
RN7SL569P	ENSG00000239468	0.703483	-8.01458	-3.00263	0.000990871	0.291287	1	0.368083	0.308778	0	3.02357	1.79799	1.25209
C21orf62-AS1	ENSG00000205930	0.196903	-2.61185	-1.38507	0.000987254	0.291287	1	0.234276	0.224113	0.147901	0.460751	0.598655	0.627153
NBL1	ENSG00000158747	0.262498	2.77255	1.47121	0.00101746	0.294705	1	1.50345	0.383311	0.412536	0.427332	0.143999	0.272184
SIPA1L2	ENSG00000116991	10.4537	-1.87113	-0.903906	0.00108417	0.298398	1	13.5614	17.5215	13.5404	17.1011	28.3828	44.1119
AC072022.2	ENSG00000285938	0.720529	-4.50699	-2.17216	0.00107722	0.298398	1	0.416989	0.583008	0.259349	0.626853	3.16849	2.29654
SLIT2	ENSG00000145147	0.248974	-2.70958	-1.43807	0.00107922	0.298398	1	0.445412	0.164726	0.157024	0.277706	1.09318	0.735455
S1PR3	ENSG00000213694	0.0147404	-4.75339	-2.24896	0.00109081	0.298398	1	0.011605	0.00324508	0.00928005	0.0560752	0.0549697	0.0150385
MEST	ENSG00000106484	0.0521004	2.89725	1.53469	0.00112696	0.304063	1	0.166784	0.0932748	0.168936	0.0967077	0.0395005	0.0216129
PDPN	ENSG00000162493	6.16562	1.58323	0.662873	0.0011669	0.310584	1	19.1026	14.5375	17.0021	13.9837	11.4544	9.08833
AC007389.1	ENSG00000204929	0.0179022	-5.17588	-2.3718	0.00133713	0.330689	1	0.0128817	0.0108062	0.00343366	0.0331969	0.0572036	0.0625985
BNC2	ENSG00000173068	0.0194488	4.30714	2.10673	0.00137675	0.330689	1	0.0138364	0.0754465	0.0608544	0.00668574	0.0245773	0.00672381
HKDC1	ENSG00000156510	0.821986	-3.12404	-1.64341	0.00135064	0.330689	1	0.439294	1.00026	0.662424	0.497309	1.30422	5.28197
UNG	ENSG00000076248	35.4673	1.54729	0.629747	0.00130333	0.330689	1	102.353	99.2518	88.1716	92.4884	59.3064	51.9961
ATF5	ENSG00000169136	8.31225	-2.30042	-1.20189	0.00133706	0.330689	1	8.06423	13.453	7.19609	8.0412	27.5742	35.2158
AC004076.1	ENSG00000268163	0.569521	-5.40242	-2.43361	0.00137302	0.330689	1	0	0.605542	0.164923	0.996553	2.33542	1.50334
SREBF2-AS1	ENSG00000184068	0.784585	-2.60206	-1.37966	0.00127903	0.330689	1	1.24131	0.624788	0.609756	1.31956	2.97662	2.37838
AF274853.1	ENSG00000287918	0.109023	-3.64094	-1.86431	0.00133599	0.330689	1	0.0783586	0.103296	0.0537087	0.140633	0.467267	0.315505
PRUNE2	ENSG00000106772	0.120858	-2.68664	-1.4258	0.00147523	0.342279	1	0.0541483	0.0847916	0.202067	0.620967	0.176334	0.256116
IER5L	ENSG00000188483	1.67063	-2.69312	-1.42928	0.00147714	0.342279	1	3.10983	1.1157	0.969696	1.90904	7.59101	4.61919
MUC19	ENSG00000205592	0.0233607	-3.3404	-1.74002	0.00145339	0.342279	1	0.0197722	0.0150787	0.0201231	0.0434268	0.10217	0.0524089
VAV3	ENSG00000134215	0.0858032	2.8446	1.50823	0.00154416	0.343386	1	0.362743	0.176493	0.185645	0.0981549	0.109536	0.0564078
LPCAT1	ENSG00000153395	24.0112	1.56648	0.647526	0.00152537	0.343386	1	77.6437	57.7999	62.455	58.0657	44.7628	33.367
CNN1	ENSG00000130176	0.0822117	-4.79755	-2.2623	0.00155165	0.343386	1	0.0186831	0.0156729	0.0896407	0.162498	0.199118	0.345003
CLEC11A	ENSG00000105472	0.140594	-6.44088	-2.68726	0.00150712	0.343386	1	0.147849	0.031007	0	0.357202	0.722206	0.107771
DNAH8	ENSG00000124721	0.0189676	-5.99872	-2.58465	0.00162634	0.353314	1	0.00345348	0.0202794	0	0.0100123	0.0736117	0.0771978
VLDLR-AS1	ENSG00000236404	0.409015	-2.94564	-1.55858	0.00165033	0.353314	1	0.187708	0.485516	0.419035	0.325008	0.826603	2.36402
TNNT3	ENSG00000130595	0.448998	-3.80452	-1.92771	0.00164592	0.353314	1	0.156066	0.343668	0.389999	2.56397	0.814321	0.530881
KCNMB1	ENSG00000145936	0.177073	-4.27625	-2.09634	0.00167073	0.353836	1	0.0614692	0.103131	0.161507	0.263073	0.171578	1.10095
PLEKHG4	ENSG00000196155	0.735042	-1.73612	-0.795864	0.00171581	0.359517	1	1.0488	1.51086	0.798191	1.69857	2.25481	2.34093
DAB1	ENSG00000173406	0.136081	-2.21788	-1.14918	0.00179005	0.368683	1	0.119378	0.229743	0.13477	0.176443	0.367966	0.621067
AC069224.1	ENSG00000260572	2.11265	-2.34084	-1.22702	0.00179699	0.368683	1	3.0597	2.4371	1.82886	3.61397	6.94455	7.47935
PRR5L	ENSG00000135362	0.0561783	-2.433	-1.28274	0.00183267	0.372126	1	0.0560804	0.0672069	0.0576581	0.0851649	0.213458	0.179086
LGR5	ENSG00000139292	0.0346189	4.40242	2.1383	0.00190316	0.382496	1	0.11163	0.0681051	0.105496	0.0196143	0.0180259	0.029589
AC084782.1	ENSG00000259941	0.115475	-3.97252	-1.99005	0.00196578	0.39109	1	0.0645079	0.0721527	0.0859738	0.290921	0.34375	0.355272
SMYD1	ENSG00000115593	28.0854	-1.99712	-0.99792	0.00199305	0.392552	1	32.8597	37.8316	42.2082	68.856	36.8986	137.772
NPNT	ENSG00000168743	0.907131	2.05205	1.03706	0.00211121	0.411707	1	3.7173	1.77362	2.14801	1.90924	0.823442	1.20428
AC010623.1	ENSG00000286721	0.122634	-5.0611	-2.33945	0.00218064	0.412874	1	0.0950318	0.0199301	0.075993	0.229596	0.358705	0.461806
ABLIM3	ENSG00000173210	0.319715	-3.25137	-1.70105	0.00220105	0.412874	1	0.271439	0.196934	0.305055	2.06309	0.293199	0.449192
CUBN	ENSG00000107611	0.0418728	-3.87823	-1.9554	0.00217026	0.412874	1	0.0239656	0.0502609	0.00958216	0.0540407	0.202205	0.0970506
MIF	ENSG00000240972	187.147	1.56186	0.643261	0.00218057	0.412874	1	569.611	423.323	542.065	492.16	309.532	265.335
HIST1H3C	ENSG00000287080	13.2627	-9.21018	-3.20323	0.00229595	0.418713	1	0.115477	9.29968	0.923423	2.12033	105.328	1.68348
GRM4	ENSG00000124493	0.12614	-2.79037	-1.48046	0.0022899	0.418713	1	0.143078	0.0709243	0.145618	0.625358	0.242594	0.227548
YBX2	ENSG00000006047	0.0688897	-2.9922	-1.58121	0.00228183	0.418713	1	0.0114455	0.115217	0.0457624	0.0884869	0.294789	0.200229
MT2A	ENSG00000125148	45.5204	1.89997	0.925979	0.00232621	0.42034	1	175.945	99.0469	106.148	87.8746	67.4703	57.2633
CPS1	ENSG00000021826	2.07646	-1.52524	-0.609036	0.00261264	0.432966	1	3.77624	4.19921	2.84804	5.94551	6.42598	5.42931
LGI2	ENSG00000153012	6.76561	1.77417	0.827146	0.00261404	0.432966	1	21.1689	22.3382	12.1184	15.0553	11.9807	6.88445
RELN	ENSG00000189056	0.0587547	2.49131	1.31691	0.00253136	0.432966	1	0.273644	0.125212	0.10278	0.0320543	0.0405055	0.132977
AC022868.2	ENSG00000286113	0.521995	-3.86691	-1.95118	0.00245958	0.432966	1	0.588649	0.322048	0.20466	0.593601	2.02301	1.81582
AC007614.1	ENSG00000279249	0.00499948	-5.52462	-2.46588	0.00255738	0.432966	1	0.00571924	0	0.00152448	0.0036847	0.0253973	0.0129699
C17orf113	ENSG00000267221	0.503693	-2.48582	-1.31372	0.00253161	0.432966	1	0.468559	0.774221	0.351979	0.864462	1.92939	1.49037
FASN	ENSG00000169710	58.4603	1.50866	0.593272	0.00256554	0.432966	1	208.098	140.662	137.032	147.58	110.79	85.9513
FUT1	ENSG00000174951	0.246441	-6.90805	-2.78828	0.00250542	0.432966	1	0.0366134	0.174048	0.0683158	0.0471774	0.390212	1.68433
RIMBP3	ENSG00000275793	0.0460629	11.6537	3.54272	0.00261591	0.432966	1	0.25178	0.0728323	0.0763696	0.0335612	0	0
HMOX1	ENSG00000100292	0.137852	4.25867	2.0904	0.00260913	0.432966	1	0.345828	0.290109	0.479344	0.111402	0.122857	0.0448146
MYH15	ENSG00000144821	0.102554	-3.44211	-1.78329	0.00266503	0.43742	1	0.0551049	0.132901	0.0385569	0.106506	0.642345	0.107113
IRF7	ENSG00000185507	0.267077	-2.70688	-1.43663	0.00274005	0.446016	1	0.16234	0.374506	0.227179	0.294159	1.02728	0.946666
KIF21B	ENSG00000116852	10.5589	1.48971	0.575029	0.00280129	0.451142	1	37.2816	25.3427	25.0543	25.1055	19.5002	18.1721
AC008063.1	ENSG00000230918	0.289543	3.49119	1.80372	0.00281735	0.451142	1	0.655269	0.916156	0.756877	0.281444	0.258652	0.176904
F2RL2	ENSG00000164220	0.207371	3.46301	1.79203	0.00286956	0.455798	1	0.699876	0.156564	0.858149	0.165332	0.193382	0.166273
LDB3	ENSG00000122367	0.418844	-2.6768	-1.42051	0.00293338	0.461656	1	0.389035	0.339675	0.501561	2.32482	0.444234	0.895098
AC103740.1	ENSG00000259370	0.237285	-3.24293	-1.6973	0.00295332	0.461656	1	0.0745223	0.250062	0.243336	0.55814	0.275775	1.22524
PITPNC1	ENSG00000154217	2.18155	1.55455	0.636498	0.00299006	0.463719	1	6.71108	5.4194	5.77855	3.19692	3.91336	5.16528
TFAP2E	ENSG00000116819	0.0573195	6.95114	2.79725	0.00302395	0.465311	1	0.209963	0.136993	0.130588	0.0450905	0.0207195	0
ADAMTSL3	ENSG00000156218	0.099242	2.32206	1.2154	0.00307105	0.468895	1	0.2935	0.314604	0.204276	0.0787882	0.12068	0.174321
KSR2	ENSG00000171435	0.0236773	-3.82798	-1.93658	0.00317999	0.478116	1	0.0144812	0.012148	0.020844	0.0503804	0.110607	0.0394078
AC011530.1	ENSG00000268434	0.360121	-138.062	-7.10918	0.00315749	0.478116	1	0	0	0	1.61003	0.109604	1.43929
AF129408.1	ENSG00000272991	0.429865	-5.04868	-2.33591	0.00323981	0.483419	1	0.368937	0.309495	0	0.950772	1.74755	0.956184
NAV1	ENSG00000134369	3.1258	1.56401	0.64525	0.00331111	0.490343	1	9.9738	7.9787	7.78309	6.80066	4.86409	5.98589
AL596325.1	ENSG00000259788	0.278315	-3.39193	-1.7621	0.00338347	0.491408	1	0.146961	0.205472	0.27421	0.710113	1.04417	0.618935
AC021087.5	ENSG00000286001	0.164559	-3.6591	-1.87149	0.0034932	0.491408	1	0.289244	0	0.104083	0.209643	0.308266	0.89957
ADRB2	ENSG00000169252	0.261044	-2.83958	-1.50568	0.00349004	0.491408	1	0.338684	0.245373	0.160037	0.34218	1.13482	0.733142
AL589740.1	ENSG00000271860	0.014993	-4.89307	-2.29074	0.00340785	0.491408	1	0.00883768	0.0148275	0	0.0256221	0.0588679	0.0429466
TRIL	ENSG00000255690	0.240454	2.24732	1.16821	0.0035179	0.491408	1	0.522259	1.11764	0.289784	0.247204	0.321846	0.362559
RNU6ATAC	ENSG00000221676	13.7742	-2.62731	-1.39359	0.00346901	0.491408	1	26.0813	6.35201	11.4372	18.2939	56.0413	42.5198
AP004609.3	ENSG00000278376	0.410298	-2.69934	-1.43261	0.00351353	0.491408	1	0.703344	0.424816	0.134984	0.924403	1.24933	1.33981
A2M	ENSG00000175899	0.501286	-3.20442	-1.68006	0.00338746	0.491408	1	0.15775	0.271632	0.743598	2.14231	1.32729	0.855346
SMIM40_1	ENSG00000285064	0.222707	6.43492	2.68592	0.00364958	0.505347	1	0.254582	0.384416	1.09933	0.147616	0	0.148457
WNT5B	ENSG00000111186	0.66322	1.9289	0.947776	0.003669	0.505347	1	2.40018	1.49961	1.61943	1.3893	0.766074	0.899073
LINC02593	ENSG00000223764	0.214965	3.69308	1.88482	0.00370421	0.506653	1	1.54467	0.107091	0.296042	0.123369	0.136054	0.248143
EML2	ENSG00000125746	0.622205	-2.21219	-1.14547	0.00375594	0.506691	1	0.760514	0.940753	0.572075	0.903126	1.46536	2.97536
AP000295.1	ENSG00000249624	0.199245	5.54375	2.47086	0.00374376	0.506691	1	0.210891	0.802005	0.539651	0.149457	0	0.163972
RNF187	ENSG00000168159	24.8301	-1.76997	-0.823727	0.00391001	0.51341	1	45.1927	40.0124	29.6921	38.3944	56.6815	118.334
AL022069.1	ENSG00000261420	2.13793	-2.27164	-1.18374	0.003883	0.51341	1	3.30465	2.50043	1.83945	3.88241	7.39499	6.95886
NTF3	ENSG00000185652	1.11189	1.8389	0.878844	0.00388786	0.51341	1	3.39095	2.85982	2.87111	2.19051	2.14196	1.02218
AHNAK2	ENSG00000185567	0.3006	1.73202	0.792458	0.00390474	0.51341	1	1.21028	0.558523	0.758005	0.809729	0.313197	0.427733
GNG4	ENSG00000168243	5.13923	1.85299	0.889853	0.00395539	0.51593	1	24.6651	7.17384	12.1835	11.9033	4.41382	8.37085
GAPDH	ENSG00000111640	370.123	1.59744	0.675765	0.00403486	0.519416	1	1209.89	819.765	1023.45	882.61	608.631	566.25
AP000547.3	ENSG00000283633	0.0497513	3.72278	1.89638	0.00401886	0.519416	1	0.276152	0.130308	0.0276035	0.0500386	0.0306576	0.033549
SREBF1	ENSG00000072310	3.3894	1.50104	0.585964	0.00417219	0.533607	1	12.6032	7.59498	8.078	7.15243	5.50528	7.25564
CA4	ENSG00000167434	41.0595	1.59615	0.6746	0.00422802	0.533814	1	70.102	127.968	127.348	73.9744	68.1006	83.8121
ZFP36	ENSG00000128016	1.7543	-2.42207	-1.27624	0.00422207	0.533814	1	2.84333	1.95768	1.13685	1.91826	7.28991	5.6572
RP1	ENSG00000104237	1.45015	1.9089	0.932739	0.0042766	0.536509	1	5.10361	2.33038	4.60209	2.57044	1.12118	3.0017
AP003108.2	ENSG00000256591	6.51927	1.78966	0.839683	0.00432689	0.539383	1	13.7831	15.9266	22.5027	15.0175	8.64086	8.73349
AL157394.3	ENSG00000286116	0.150687	-2.7018	-1.43392	0.00438198	0.542814	1	0.163865	0.17976	0.100797	0.523801	0.313458	0.465529
PPIF	ENSG00000108179	24.3659	1.54157	0.624397	0.00447254	0.545043	1	85.3699	52.2715	64.5377	70.055	39.461	31.6878
ELF5	ENSG00000135374	0.0503064	-4.17921	-2.06323	0.00448299	0.545043	1	0.0235888	0.0494705	0.018863	0.125379	0.178075	0.126092
CBSL	ENSG00000274276	1.56798	-3.09665	-1.63071	0.00445468	0.545043	1	1.12521	0.943918	1.99011	4.28563	1.15218	8.22121
CARF	ENSG00000138380	1.0442	-1.67697	-0.745858	0.00452949	0.547318	1	1.91846	1.60936	1.4922	2.55304	2.77458	3.64249
STRA6LP	ENSG00000255036	0.762397	-1.80861	-0.85488	0.00455762	0.547359	1	1.72807	0.837295	0.893446	2.0659	2.38814	2.07766
FGF10	ENSG00000070193	0.126367	-4.99969	-2.32184	0.00459466	0.548463	1	0.0528103	0.0886033	0.056307	0.0510357	0.328319	0.701459
AC008750.2	ENSG00000255441	0.193109	-7.92016	-2.98553	0.00467469	0.554655	1	0.158221	0.0442429	0	0.25484	0.140522	1.28145
IP6K3	ENSG00000161896	0.26337	-3.17131	-1.66508	0.00478456	0.55973	1	0.113865	0.270637	0.257983	0.586871	0.505636	1.18042
AC023905.1	ENSG00000259221	3.93951	-1.85786	-0.893645	0.00480272	0.55973	1	3.97261	5.94456	6.78276	9.99554	7.27894	16.7657
LAMA1	ENSG00000101680	2.83379	1.53675	0.619886	0.00474636	0.55973	1	9.9677	6.40729	7.14749	6.37338	3.604	6.29596
B3GNT2	ENSG00000170340	4.22758	1.66991	0.739772	0.00487214	0.563153	1	11.7354	12.3019	10.4073	6.19906	9.45117	6.57669
GRPEL1	ENSG00000109519	10.3156	1.47769	0.563345	0.00491786	0.563153	1	29.5018	26.3714	28.3473	25.024	22.2546	14.6476
DLL4	ENSG00000128917	0.359678	-3.16586	-1.6626	0.00490978	0.563153	1	0.367928	0.346061	0.196145	0.398663	1.65366	0.986078
ACSF2	ENSG00000167107	0.0519792	-2.82262	-1.49704	0.00494901	0.563443	1	0.00914335	0.0767019	0.0511809	0.132541	0.186772	0.12441
S100A10	ENSG00000197747	0.199374	8.32754	3.05789	0.00500232	0.566239	1	1.46651	0.263621	0.083765	0	0.13955	0.0509036
AL135905.1	ENSG00000266680	0.631916	-2.57016	-1.36186	0.00503154	0.566293	1	0.830547	0.570053	0.573588	1.13099	2.51467	1.72449
LPCAT3	ENSG00000111684	1.67574	1.82019	0.864089	0.00514273	0.575518	1	6.21184	4.60464	3.16105	2.97972	1.73533	3.39185
NEFM	ENSG00000104722	0.449705	-1.87443	-0.906453	0.00524656	0.57678	1	0.962383	0.55045	0.43143	1.62053	1.63175	0.595215
IL16	ENSG00000172349	0.00962955	-8.52595	-3.09186	0.00522791	0.57678	1	0	0.00367654	0.00350464	0.0338831	0.0155696	0.034076
GDF15	ENSG00000130513	11.6867	-3.37365	-1.75431	0.00527114	0.57678	1	3.53021	11.6114	11.7184	6.01322	33.947	59.8081
AC008738.7	ENSG00000273420	1.01825	-4.49039	-2.16684	0.00520467	0.57678	1	0	1.65326	0	0.902163	5.52736	2.11703
AC006994.2	ENSG00000279317	0.11036	-3.19914	-1.67769	0.00533543	0.578928	1	0.0950531	0.119608	0.0570075	0.137788	0.517073	0.277146
EDNRA	ENSG00000151617	0.449734	2.20972	1.14386	0.00537316	0.578928	1	1.37575	1.16459	1.15014	0.73728	0.599819	0.461904
BICC1	ENSG00000122870	2.1044	1.43447	0.520519	0.00546437	0.578928	1	6.60708	5.01563	5.68029	4.33914	4.31834	4.2734
EBF3	ENSG00000108001	1.23753	1.6978	0.763663	0.00541194	0.578928	1	3.95552	3.14509	3.08972	2.11628	2.2402	2.06147
AC021683.2	ENSG00000267506	3.14277	1.52952	0.613077	0.0054958	0.578928	1	9.24621	7.50261	8.96271	6.51505	4.08741	7.48526
CDH2	ENSG00000170558	4.56742	1.73578	0.795586	0.00549652	0.578928	1	17.4202	10.8426	9.93315	8.90928	5.72942	8.58203
MATK	ENSG00000007264	2.35635	1.84304	0.88209	0.00547884	0.578928	1	6.43016	5.71651	7.02663	4.01068	3.5835	3.68494
SV2C	ENSG00000122012	0.0752071	3.99787	1.99923	0.00553659	0.580047	1	0.305007	0.101594	0.225968	0.0303427	0.0318691	0.100265
AGAP2	ENSG00000135439	0.306477	-2.7694	-1.46957	0.00557605	0.581089	1	0.196953	0.449399	0.220493	0.631911	0.804636	1.19445
TAFA4	ENSG00000163377	0.682124	2.50706	1.32599	0.00568236	0.582904	1	1.43298	3.22382	0.807335	0.786833	1.12806	0.474787
ID4	ENSG00000172201	0.691218	-2.18097	-1.12497	0.00577672	0.582904	1	1.697	0.482182	0.492468	0.991922	3.06296	1.79562
NRCAM	ENSG00000091129	1.87731	1.604	0.681678	0.00576748	0.582904	1	5.60252	5.00377	4.76981	3.5449	4.05073	2.73511
ANGPT2	ENSG00000091879	0.0444154	3.73564	1.90136	0.00565758	0.582904	1	0.0782347	0.11157	0.162659	0.0378028	0.0416898	0.0228108
FGF17	ENSG00000158815	0.471963	2.31097	1.2085	0.00566392	0.582904	1	1.72541	1.12276	1.08316	0.935008	0.630145	0.250755
LAMA3	ENSG00000053747	0.137264	-2.14282	-1.09951	0.00580063	0.582904	1	0.169723	0.187817	0.147271	0.184958	0.647847	0.326396
AC010616.1	ENSG00000285505	0.0897376	-137.12	-7.0993	0.00577865	0.582904	1	0	0	0	0.796735	0	0
GLIPR2	ENSG00000122694	6.12995	1.93216	0.950211	0.00583749	0.583631	1	26.8924	9.05292	16.0384	13.6818	6.2869	8.31313
HTR6	ENSG00000158748	0.0396309	-5.98602	-2.5816	0.0058964	0.585319	1	0.0557937	0	0	0.148277	0.111493	0.0813386
SLC35F3	ENSG00000183780	0.255935	2.32448	1.21691	0.00594354	0.585319	1	0.322914	0.451478	1.22962	0.237762	0.396045	0.328784
HCG27	ENSG00000206344	0.12847	-3.15066	-1.65565	0.00592239	0.585319	1	0.163593	0.0857718	0.0817614	0.197619	0.290585	0.616106
COX8A	ENSG00000176340	69.0805	1.56013	0.641665	0.00599731	0.587676	1	210.621	153.824	202.23	159.786	123.5	109.286
COL28A1	ENSG00000215018	0.1661	-3.12323	-1.64304	0.00604894	0.589641	1	0.0638698	0.234409	0.102148	0.331764	0.822513	0.2483
NANS	ENSG00000095380	3.9406	1.50775	0.592399	0.00607723	0.589641	1	14.4576	8.22374	10.1515	10.6788	6.31036	6.26823
NUDT4B	ENSG00000177144	12.6285	1.44412	0.530189	0.00623268	0.591973	1	37.8851	31.6705	33.9151	26.291	24.3961	26.3552
RNU4ATAC	ENSG00000264229	22.1457	-2.49856	-1.3211	0.00629121	0.591973	1	32.5536	18.906	20.0245	24.1998	111.2	51.1088
AC093866.1	ENSG00000251095	0.145456	-2.65383	-1.40808	0.00637176	0.591973	1	0.0988029	0.140265	0.188405	0.279103	0.364502	0.605705
AL096711.2	ENSG00000255330	0.0364634	-3.08813	-1.62673	0.00633905	0.591973	1	0.0184941	0.0232715	0.0480641	0.0848948	0.119083	0.107846
INA	ENSG00000148798	3.71857	1.94655	0.960919	0.00636314	0.591973	1	22.0429	4.85535	5.82779	7.12172	3.30146	6.49674
AC087260.1	ENSG00000256473	1.95679	-3.19242	-1.67465	0.00625351	0.591973	1	2.77577	1.44148	0.951287	4.21534	2.34787	10.4057
WSCD2	ENSG00000075035	0.220377	3.78212	1.91919	0.00628273	0.591973	1	0.880778	0.164926	0.80494	0.296393	0.055875	0.168148
BICDL1	ENSG00000135127	0.296278	-2.64524	-1.4034	0.00620663	0.591973	1	0.231965	0.324319	0.332341	0.607127	0.523625	1.42783
UNC13A	ENSG00000130477	0.09033	3.12344	1.64313	0.0062067	0.591973	1	0.577984	0.131151	0.0947111	0.0824107	0.0841521	0.0874843
TMEM9B-AS1	ENSG00000254860	0.933069	-2.04496	-1.03207	0.00641992	0.593647	1	1.29835	1.06899	1.28818	1.85885	2.74398	3.38834
TRPM3	ENSG00000083067	0.451631	1.89783	0.924354	0.00655618	0.603414	1	1.50132	1.34875	0.881249	0.244384	0.565029	1.23922
AC093884.1	ENSG00000286239	0.261602	-3.48603	-1.80158	0.00662413	0.606832	1	0.262779	0	0.333741	0.95604	0.809976	0.480741
AL137798.2	ENSG00000282143	0.461717	-3.73535	-1.90124	0.00758504	0.606976	1	0.194629	0.435389	0.311274	0.689659	1.84381	1.38717
AC103591.3	ENSG00000273338	6.43787	-3.23482	-1.69369	0.0067267	0.606976	1	5.57937	6.16966	3.85319	7.10747	35.8128	11.0916
TAGLN2	ENSG00000158710	1.0979	1.91074	0.934132	0.00797067	0.606976	1	4.43298	1.64483	3.15289	3.2542	0.889631	1.03567
AC012447.1	ENSG00000265451	0.500252	-3.57613	-1.8384	0.00756457	0.606976	1	0.621748	0.39118	0.124296	0.901281	2.34683	0.981947
FZD5	ENSG00000163251	7.58846	1.41535	0.501155	0.0074003	0.606976	1	24.1413	19.3358	18.9857	20.0554	14.0308	13.4586
IGSF11	ENSG00000144847	4.78674	1.50499	0.589751	0.00768681	0.606976	1	9.43447	12.8337	15.9279	10.0585	10.5315	7.50792
TMCC1-AS1	ENSG00000271270	4.08795	-1.69429	-0.760682	0.00801247	0.606976	1	9.33867	5.49595	5.05187	11.4922	8.94798	14.8216
POU4F2	ENSG00000151615	0.652745	2.44835	1.29181	0.00681248	0.606976	1	2.22536	0.763696	2.41315	1.17304	0.598915	0.606245
AC010491.1	ENSG00000261360	0.174705	-3.32833	-1.7348	0.00717003	0.606976	1	0.151602	0.190765	0.0757689	0.128194	0.690048	0.663039
RNF145	ENSG00000145860	12.4171	1.4857	0.57114	0.00724321	0.606976	1	43.2739	27.5419	32.1701	31.462	21.8947	20.8224
ARL10	ENSG00000175414	1.4628	-1.45716	-0.543164	0.00798552	0.606976	1	3.26178	3.08994	1.72653	3.77007	4.84738	3.8951
HIST1H3I	ENSG00000275379	0.419104	-74.5919	-6.22095	0.00765269	0.606976	1	0	0	0	0.12463	3.20704	0.125339
CDKN1A	ENSG00000124762	9.4331	-1.67023	-0.740047	0.00703607	0.606976	1	15.0323	10.2486	19.8446	18.8601	25.9914	36.0432
AL353135.1	ENSG00000271931	0.727323	-3.10536	-1.63476	0.00699561	0.606976	1	0.841333	0.617557	0.420487	1.32122	2.24165	2.65749
AL355297.2	ENSG00000270487	1.44345	-3.84642	-1.94352	0.00734648	0.606976	1	0.410884	0.689366	1.64283	3.17661	4.01412	5.19138
PCLO	ENSG00000186472	1.05998	-1.53663	-0.619772	0.00713397	0.606976	1	1.99281	2.12076	1.43421	2.38043	2.86268	3.85559
KCP	ENSG00000135253	0.0175909	-3.95699	-1.9844	0.00687463	0.606976	1	0	0.0323023	0	0.0434144	0.0512983	0.0561363
AC012349.1	ENSG00000254254	0.0195471	-4.8806	-2.28706	0.00692751	0.606976	1	0.00685958	0.00575438	0.016456	0.0861779	0.0304612	0.0533345
OSR2	ENSG00000164920	1.11449	1.76866	0.822656	0.00734075	0.606976	1	3.00296	2.38255	3.67434	1.92304	2.32964	1.30105
AL353743.2	ENSG00000230303	0.111407	-2.38002	-1.25097	0.00771544	0.606976	1	0.112859	0.155936	0.100866	0.23738	0.341976	0.374228
AL138921.1	ENSG00000227492	0.109171	-5.53316	-2.4681	0.00782357	0.606976	1	0	0.0346834	0.0991851	0.319643	0.183599	0.442012
FAM111B	ENSG00000189057	9.01336	1.4341	0.520144	0.00789632	0.606976	1	25.8232	24.8148	22.9636	20.1446	18.6715	16.6472
PRSS23	ENSG00000150687	0.399071	2.43118	1.28165	0.00783768	0.606976	1	0.634529	2.01262	0.507406	0.496831	0.678725	0.270086
AP002008.4	ENSG00000286028	0.182817	-5.71474	-2.51469	0.00737926	0.606976	1	0.0463321	0	0.18525	0.358202	0.617238	0.585391
LMO3	ENSG00000048540	0.333452	1.74806	0.805754	0.00740502	0.606976	1	0.906187	0.933559	0.872958	0.624794	0.743632	0.319326
TAFA2	ENSG00000198673	0.133518	-2.17526	-1.12119	0.00717205	0.606976	1	0.188993	0.158543	0.14655	0.304404	0.305185	0.539914
KCNMB4	ENSG00000135643	0.674064	2.11776	1.08254	0.00728322	0.606976	1	2.87923	1.7932	1.0291	1.24368	1.07516	0.508785
AL590096.1	ENSG00000277020	0.26462	-4.85866	-2.28056	0.00790235	0.606976	1	0	0.112996	0.269283	0.260345	1.37575	0.58911
TSC22D1-AS1	ENSG00000278156	0.560843	-2.41272	-1.27066	0.0075714	0.606976	1	0.889277	0.578792	0.429123	0.651954	2.34216	1.75838
AC091117.1	ENSG00000259352	0.544531	5.03534	2.33209	0.00794164	0.606976	1	2.11518	1.25251	1.19395	0	0.884032	0
GABPB1-AS1	ENSG00000244879	5.39231	-1.8144	-0.859491	0.00760021	0.606976	1	10.731	6.35164	7.39192	11.1874	11.8022	23.4437
CPLX3	ENSG00000213578	0.394656	-2.81721	-1.49427	0.0069633	0.606976	1	0.450084	0.399777	0.275228	0.383787	1.62246	1.33804
NBR2	ENSG00000198496	0.846972	-2.34154	-1.22746	0.00793582	0.606976	1	1.16511	0.802338	1.00122	1.47887	1.34367	4.49568
ATP5MC1	ENSG00000159199	15.2235	1.54276	0.625517	0.00769039	0.606976	1	47.8961	35.2992	41.9961	38.6081	26.5347	22.5757
AC005837.1	ENSG00000261335	1.70207	-2.22163	-1.15162	0.00754382	0.606976	1	3.85876	1.73506	0.863994	3.66943	5.45595	5.43047
HRH4	ENSG00000134489	0.0283714	-13.1133	-3.71296	0.00688897	0.606976	1	0	0	0.011568	0.0699001	0.128479	0.0421788
PSMD8	ENSG00000099341	16.4655	1.44301	0.529085	0.00729915	0.606976	1	50.1532	40.0965	44.8149	39.972	29.7458	31.2405
AC011452.1	ENSG00000269179	0.416057	112.859	6.81838	0.0076757	0.606976	1	0	2.78384	0.368566	0	0	0
AC020909.2	ENSG00000268518	4.18724	-2.43527	-1.28408	0.00674998	0.606976	1	3.47151	4.61688	5.34892	19.0654	5.56474	11.85
MYL9	ENSG00000101335	4.42755	-2.51269	-1.32923	0.00768471	0.606976	1	3.79409	5.08297	5.32833	6.53055	5.36464	26.436
CASS4	ENSG00000087589	0.0514887	-4.79208	-2.26065	0.00733479	0.606976	1	0.020913	0.0350871	0.0250849	0.313259	0.0371471	0.101626
ZNF831	ENSG00000124203	0.0467109	3.81843	1.93298	0.00782759	0.606976	1	0.27404	0.0268202	0.109569	0.0662079	0.0162257	0.0266339
AL137077.2	ENSG00000283078	1.6756	-2.37999	-1.25095	0.0078278	0.606976	1	2.90072	1.5485	1.3443	1.56089	7.14318	5.47821
PRPS1	ENSG00000147224	29.2602	1.47076	0.556566	0.00768425	0.606976	1	103.644	66.3656	73.0226	78.914	49.4796	48.4507
GPC3	ENSG00000147257	4.50488	1.52703	0.610727	0.00791289	0.606976	1	14.8097	12.5217	9.85109	9.20751	9.21898	7.58664
AC242426.2	ENSG00000237188	1.37607	-1.99089	-0.993414	0.00824942	0.6106	1	2.95818	1.35358	1.51558	2.54938	2.09271	7.25608
SLC39A1	ENSG00000143570	6.50981	1.50067	0.585603	0.00830388	0.6106	1	23.4826	15.8275	14.8498	18.7323	9.19819	10.7043
DBI	ENSG00000155368	38.6791	1.60423	0.681885	0.00849601	0.6106	1	140.295	88.9459	92.71	117.227	56.5685	42.3983
TREX1	ENSG00000213689	0.141155	97.3008	6.60438	0.00841794	0.6106	1	0.329445	0.368487	0.439072	0	0	0
ZBTB20	ENSG00000181722	0.240278	-1.78472	-0.835699	0.0082199	0.6106	1	0.30766	0.438056	0.317835	0.609107	0.651354	0.803297
HIST1H1T	ENSG00000187475	2.0849	-3.59529	-1.84611	0.00852533	0.6106	1	1.32879	2.53904	0.590322	1.64084	13.7028	2.00892
PPP1R9A	ENSG00000158528	7.01938	-1.44359	-0.529663	0.00813352	0.6106	1	12.4153	14.2083	12.0446	16.455	20.0511	23.6955
AC012213.5	ENSG00000285982	0.0678785	-84.3278	-6.39794	0.00832512	0.6106	1	0	0	0	0.231294	0.343372	0
C11orf52	ENSG00000149300	0.130391	3.66331	1.87315	0.00843088	0.6106	1	0.235704	0.49432	0.306285	0.170838	0.0785015	0.0572701
AC090061.1	ENSG00000247363	0.126393	-2.65827	-1.41049	0.00849768	0.6106	1	0.0931529	0.14066	0.134083	0.36009	0.397115	0.325926
RPGRIP1	ENSG00000092200	0.236688	2.16729	1.11589	0.00845286	0.6106	1	1.25	0.227604	0.5734	0.430759	0.180726	0.35787
AL160314.2	ENSG00000258458	0.212277	-2.67783	-1.42106	0.00813895	0.6106	1	0.211755	0.24596	0.169332	0.487986	0.708869	0.617413
MYHAS	ENSG00000272975	0.136702	-5.28543	-2.40202	0.00842945	0.6106	1	0	0.0977663	0.093195	0.382932	0.0414026	0.770225
GDF1	ENSG00000130283	0.116326	-129.669	-7.01869	0.00840717	0.6106	1	0	0	0	1.0328	0	0
AC005498.2	ENSG00000267421	0.174588	-4.57633	-2.19419	0.00843369	0.6106	1	0.143902	0.120717	0.0383576	0.185422	0.426015	0.885769
RGPD5	ENSG00000015568	0.666809	1.79633	0.845051	0.00858942	0.610748	1	2.0402	1.89016	1.54182	0.870264	1.2113	1.16938
NOXRED1	ENSG00000165555	0.0467054	-5.98783	-2.58203	0.00856902	0.610748	1	0	0.0356855	0.0170085	0.123329	0.113342	0.165375
ZCCHC23	ENSG00000246774	0.050552	-7.23978	-2.85595	0.00869386	0.61595	1	0.0543352	0	0	0.157528	0.144771	0.132021
AL445231.1	ENSG00000236137	0.289282	-3.28161	-1.7144	0.00887049	0.620823	1	0.326849	0.182792	0.217806	0.658053	0.217714	1.64126
ETV5	ENSG00000244405	0.855366	-2.30029	-1.20182	0.00885248	0.620823	1	0.835504	0.901143	1.20408	1.6326	2.40552	3.29271
CTTNBP2	ENSG00000077063	0.0141623	-7.23691	-2.85537	0.00888871	0.620823	1	0	0.0127605	0	0.0588008	0.0270195	0.0369597
ADAMTS13	ENSG00000160323	0.139635	-2.06948	-1.04927	0.0088168	0.620823	1	0.269291	0.132426	0.148511	0.251268	0.437099	0.505397
HIST3H2A	ENSG00000181218	132.471	-1.50463	-0.589408	0.0090023	0.624328	1	263.717	223.165	223.907	274.085	352.613	510.252
ZNF93	ENSG00000184635	7.12497	-1.51166	-0.596138	0.0089841	0.624328	1	12.9969	13.0069	11.9657	14.378	16.7154	30.1847
SESN2	ENSG00000130766	11.558	-2.68782	-1.42644	0.00929592	0.627339	1	4.07252	16.3241	12.9408	4.52749	33.7219	60.3829
SCP2	ENSG00000116171	3.74183	1.53437	0.617651	0.00928038	0.627339	1	13.3843	7.05241	10.6669	9.24779	5.83514	6.56024
AC079145.1	ENSG00000227210	0.331111	-2.65045	-1.40624	0.00913392	0.627339	1	0.454084	0.404009	0.165051	0.505313	1.01433	1.3106
AC007279.2	ENSG00000287133	0.406997	-2.42554	-1.2783	0.00928428	0.627339	1	0.476287	0.456627	0.399004	0.635628	1.67189	1.14623
FERMT2	ENSG00000073712	4.28396	-1.57045	-0.651177	0.00925423	0.627339	1	8.24214	7.18739	6.72612	7.94701	9.91778	18.9732
SYNDIG1	ENSG00000101463	3.32237	2.19542	1.13449	0.00909439	0.627339	1	10.1534	2.98022	14.1167	5.5313	3.36944	4.51844
CSE1L-AS1	ENSG00000227431	0.263459	-3.72663	-1.89787	0.00930052	0.627339	1	0.311788	0.130777	0.124662	0.97926	0.899958	0.378783
APOL4	ENSG00000100336	0.0649284	2.75087	1.45989	0.00927101	0.627339	1	0.217974	0.193013	0.125887	0.0585136	0.0967952	0.0470774
PIP4P2	ENSG00000155099	0.293068	-2.4357	-1.28434	0.00951178	0.637684	1	0.554435	0.248056	0.192122	1.08947	0.771448	0.664586
SOCS1	ENSG00000185338	4.17177	-2.37816	-1.24984	0.00951864	0.637684	1	7.31903	3.44126	3.56356	5.39038	20.5755	9.2072
ITGA7	ENSG00000135424	1.19172	-1.82363	-0.866812	0.00955971	0.638264	1	2.11251	1.74424	1.39665	4.95912	2.45973	2.90188
CCNE1	ENSG00000105173	3.86842	1.72221	0.78426	0.00962933	0.640741	1	12.9225	9.93712	9.11082	9.44948	4.70556	5.81918
AC032011.1	ENSG00000274340	0.452087	-2.75694	-1.46307	0.00968894	0.64133	1	0.513273	0.574101	0.218903	0.958981	1.91459	0.964441
ADPGK-AS1	ENSG00000260898	0.0997805	-2.67567	-1.4199	0.00970331	0.64133	1	0.0944625	0.0880477	0.10911	0.152147	0.447443	0.244821
U3_40	ENSG00000212195	60.4619	-2.29826	-1.20054	0.00980698	0.646014	1	80.5877	68.511	59.4689	48.3481	333.846	124.844
FRMD4B	ENSG00000114541	1.60331	1.54254	0.625311	0.00990775	0.648316	1	4.90243	3.55284	4.69979	3.63101	2.70655	2.86064
DLGAP1-AS1	ENSG00000177337	0.457626	-2.32734	-1.21868	0.00988334	0.648316	1	0.626228	0.525332	0.440677	0.653599	1.24583	2.02065
AL109811.3	ENSG00000277726	0.0900841	10.7108	3.421	0.0100662	0.649536	1	0.0240381	0.625119	0.0384445	0	0.0640472	0
MPP4	ENSG00000082126	0.765307	-2.22901	-1.1564	0.0100822	0.649536	1	1.10873	0.776587	0.921041	1.52919	1.45316	3.61982
AZIN1-AS1	ENSG00000253320	0.18299	-2.18736	-1.12919	0.0100913	0.649536	1	0.178225	0.221274	0.262235	0.399586	0.348233	0.831437
FIBIN	ENSG00000176971	0.0311434	-6.79747	-2.765	0.0100678	0.649536	1	0	0.0149409	0.0142423	0	0.173999	0.0865498
AL022341.1	ENSG00000228201	0.628368	-3.15514	-1.65771	0.0100555	0.649536	1	1.09006	0.342911	0.217918	1.58014	1.57319	2.25127
POTEF	ENSG00000196604	0.138959	-2.04205	-1.03002	0.0104429	0.65521	1	0.078875	0.321382	0.117136	0.315787	0.590435	0.27378
ZNF853	ENSG00000236609	5.27881	-1.46002	-0.545985	0.0103168	0.65521	1	9.53358	11.1275	8.02948	12.1429	17.6287	15.345
NDUFC2	ENSG00000151366	16.7553	1.46786	0.553712	0.0103182	0.65521	1	56.7571	38.0127	43.8581	41.6547	29.1814	30.3224
NEUROD4	ENSG00000123307	0.0606746	-3.32949	-1.7353	0.0104256	0.65521	1	0.0539893	0.0905813	0	0.0652188	0.239749	0.209888
AC025164.1	ENSG00000245904	0.248996	-2.37232	-1.2463	0.010434	0.65521	1	0.269782	0.309452	0.250956	0.462905	0.919294	0.738443
CHGA	ENSG00000100604	0.212289	2.37144	1.24576	0.0102814	0.65521	1	1.17436	0.382297	0.294341	0.27102	0.311341	0.204422
GRB2	ENSG00000177885	21.5491	1.39197	0.477126	0.0104456	0.65521	1	64.5803	54.4393	57.5291	50.1475	44.1201	42.4371
AC087741.2	ENSG00000275479	0.744449	-4.13709	-2.04862	0.0102379	0.65521	1	0.616325	0.258512	0.49285	1.78684	1.91583	2.69552
PAQR9	ENSG00000188582	0.750695	1.94418	0.95916	0.0105117	0.657267	1	1.97776	2.05515	2.0611	0.887829	1.30322	1.19051
SRPRA	ENSG00000182934	7.27366	1.41495	0.500746	0.0106833	0.665883	1	26.7959	15.7147	18.1169	18.2268	12.1659	15.1016
PURPL	ENSG00000250337	1.98642	-1.80165	-0.849318	0.0107883	0.667919	1	3.62315	1.96013	3.3436	4.33333	5.62914	7.07025
TMEM161B-AS1	ENSG00000247828	0.854867	-1.50223	-0.587109	0.0107541	0.667919	1	1.78132	1.42099	1.37745	2.00109	2.62604	2.69356
EIF5AL1	ENSG00000253626	0.0959481	2.48689	1.31434	0.0108297	0.667919	1	0.331275	0.243163	0.220756	0.133393	0.12259	0.0804913
AC004771.3	ENSG00000262227	0.766983	-2.7519	-1.46043	0.0108517	0.667919	1	0.48098	0.806971	0.846164	1.20852	3.50284	1.77636
S1PR1	ENSG00000170989	0.0505978	2.17791	1.12294	0.0110166	0.669414	1	0.11163	0.229855	0.0649207	0.0196143	0.0811167	0.09863
VAMP8	ENSG00000118640	0.149227	-4.3216	-2.11156	0.0110459	0.669414	1	0.0592223	0.149042	0.0473577	0.286161	0.525974	0.460464
DUSP14	ENSG00000276023	10.4033	1.45067	0.53672	0.0109499	0.669414	1	29.2728	21.8766	33.6787	22.8287	22.7171	17.8474
AC022137.3	ENSG00000286261	0.232042	2.5505	1.35078	0.0109455	0.669414	1	0.825275	0.357321	0.745092	0.282999	0.283725	0.232863
H1F0	ENSG00000189060	64.1513	-1.64213	-0.715572	0.0110093	0.669414	1	73.9433	135.763	93.8295	116.934	249.552	179.07
AL139246.5	ENSG00000272449	0.318651	-3.46872	-1.79441	0.0111976	0.669923	1	0.346205	0.145213	0.249161	0.368028	1.2914	1.04307
DHCR24	ENSG00000116133	18.0344	1.80909	0.855266	0.0118056	0.669923	1	66.9757	35.8131	47.6372	51.6103	18.6132	19.3324
KLHDC9	ENSG00000162755	0.498418	-2.14725	-1.10249	0.0113079	0.669923	1	0.554693	0.827239	0.443565	1.28057	1.83372	1.13811
TOR3A	ENSG00000186283	8.21754	1.49705	0.582127	0.0114259	0.669923	1	24.9237	20.2047	22.2574	20.3843	14.2363	14.045
MFSD4A	ENSG00000174514	4.76672	1.85567	0.891938	0.0119527	0.669923	1	19.2334	14.3683	6.48587	5.36999	3.95948	12.9542
SYT14	ENSG00000143469	0.0219538	-2.59192	-1.37402	0.0119071	0.669923	1	0.0417145	0.0254499	0.00303249	0.0329831	0.10104	0.0515992
RAPGEF4	ENSG00000091428	3.64935	1.45453	0.54055	0.0119726	0.669923	1	9.69322	10.6215	9.3277	8.2963	7.52535	6.34079
CADM2	ENSG00000175161	0.0678151	-2.73749	-1.45285	0.0116661	0.669923	1	0.053057	0.0667629	0.0721268	0.112803	0.30158	0.159855
EPHA6	ENSG00000080224	0.0429877	2.7932	1.48192	0.0112121	0.669923	1	0.21906	0.0777468	0.0741116	0.0244267	0.0598629	0.0491316
LRRC66	ENSG00000188993	0.0734491	-3.42157	-1.77466	0.0115002	0.669923	1	0.0637259	0.0400939	0.0636987	0.153961	0.212239	0.263224
AC104596.1	ENSG00000250326	0.63527	-2.36238	-1.24024	0.0115199	0.669923	1	0.660192	0.817549	0.653626	1.36716	1.7311	2.35268
ATOX1	ENSG00000177556	1.6857	1.70283	0.767938	0.0119525	0.669923	1	5.85786	3.74283	4.37685	4.61485	2.12955	2.10424
HIST1H4L	ENSG00000275126	0.276998	-6.32331	-2.66068	0.0119428	0.669923	1	0	0	0.271699	0.164176	1.81057	0.330221
DDX39B-AS1	ENSG00000234006	0.462363	-3.40256	-1.76662	0.0118123	0.669923	1	0.402307	0.506233	0.160854	0.583182	1.96517	1.3685
TIAM2	ENSG00000146426	3.21494	1.4909	0.576187	0.0111142	0.669923	1	12.8741	6.1383	7.99774	8.51049	4.49439	6.14224
AC083880.1	ENSG00000273391	2.10215	-2.34922	-1.23218	0.0112655	0.669923	1	3.07126	1.5791	2.53518	3.734	8.53504	5.58474
ARC	ENSG00000198576	1.62492	-2.74115	-1.45478	0.0118842	0.669923	1	2.03657	1.32219	1.41614	1.36914	7.76977	4.56108
CCDC180	ENSG00000197816	0.358379	-1.73532	-0.795199	0.0115472	0.669923	1	0.619154	0.621422	0.421434	0.897521	0.939399	1.24291
FRRS1L	ENSG00000260230	0.00580177	6.90553	2.78775	0.0116999	0.669923	1	0.0272532	0.0114311	0.0108966	0.00329217	0	0.00331091
CYP2R1	ENSG00000186104	1.38011	-1.68857	-0.755799	0.0119557	0.669923	1	2.1596	2.71747	1.6237	3.06248	4.45104	4.28907
GSTP1	ENSG00000084207	141.477	1.73974	0.798876	0.011271	0.669923	1	516.338	228.463	433.277	362.339	141.47	221.342
AC137834.1	ENSG00000258830	0.095371	-86.189	-6.42943	0.0114569	0.669923	1	0	0	0	0.170176	0.625578	0
GPR176	ENSG00000166073	1.23951	1.59531	0.673836	0.0117053	0.669923	1	3.9243	3.33546	2.93938	2.54163	2.8048	1.50951
AC245033.1	ENSG00000260836	0.0681919	-66.767	-6.06106	0.0118633	0.669923	1	0	0	0	0.370676	0.0851646	0.139795
EML2-AS1	ENSG00000267757	0.146858	-3.77099	-1.91495	0.0118825	0.669923	1	0.0858364	0.144013	0.0686398	0.290332	0.228703	0.750818
SEPTIN3	ENSG00000100167	0.11478	2.55391	1.35271	0.0114707	0.669923	1	0.637263	0.180268	0.18369	0.193348	0.105298	0.100825
NDUFA6	ENSG00000184983	22.367	1.46575	0.551641	0.0115414	0.669923	1	73.196	52.735	58.5949	56.0631	40.5949	38.6358
MYH3	ENSG00000109063	0.664359	-2.2555	-1.17345	0.0120345	0.671476	1	0.761278	0.625318	0.932168	3.78577	0.75359	1.27168
RNU11	ENSG00000274978	40.4424	-2.41076	-1.26949	0.0120724	0.671689	1	32.8308	43.1368	54.0884	48.9293	183.381	109.564
WNT2B	ENSG00000134245	0.0627748	1.98716	0.990706	0.0121288	0.672463	1	0.235592	0.165294	0.123312	0.124187	0.0951081	0.0582837
SLC45A3	ENSG00000158715	4.01216	1.59775	0.67604	0.0122185	0.672463	1	13.9291	9.36211	9.97496	8.02746	6.54931	7.57888
TAS2R5	ENSG00000127366	0.319788	-3.01089	-1.59019	0.0122229	0.672463	1	0.322353	0.270416	0.257772	0.356023	0.817979	1.56647
REEP6	ENSG00000115255	0.124289	3.39002	1.76129	0.012173	0.672463	1	0.678869	0.131421	0.271432	0.17663	0.0695685	0.0761297
PGPEP1	ENSG00000130517	0.259589	-1.75572	-0.81206	0.0122867	0.67409	1	0.4447	0.473715	0.265295	0.750368	0.789907	0.686036
NABP1	ENSG00000173559	0.771989	-1.59842	-0.676645	0.0125328	0.678012	1	1.55431	1.13969	1.18461	1.57997	2.85291	2.14473
FAM218A	ENSG00000250486	1.75012	-1.98064	-0.985963	0.0126474	0.678012	1	2.68066	2.53496	1.90977	3.32065	5.15116	6.51332
AC016596.1	ENSG00000227908	0.185324	-2.57752	-1.36599	0.0125524	0.678012	1	0.185248	0.155401	0.222202	0.358045	0.616969	0.607641
DPYSL3	ENSG00000113657	13.352	1.40082	0.486267	0.0126203	0.678012	1	41.021	37.0999	31.4862	28.5832	25.4029	29.8868
IGFBPL1	ENSG00000137142	3.91069	-1.65844	-0.729827	0.012662	0.678012	1	3.5227	8.9402	5.74089	11.5919	10.4948	11.5424
MIDN	ENSG00000167470	3.39276	1.41854	0.504403	0.0126161	0.678012	1	12.366	9.2749	6.61442	8.22165	6.16205	6.75468
NDRG3	ENSG00000101079	13.9774	1.36613	0.450096	0.012668	0.678012	1	41.8829	38.2991	34.3371	34.379	30.3964	25.6466
CEBPB-AS1	ENSG00000277449	0.356251	-2.99295	-1.58157	0.0125516	0.678012	1	0.220183	0.436581	0.288116	0.29016	0.728876	2.04268
RIMBP3C	ENSG00000183246	0.0273252	-72.2023	-6.17397	0.0125742	0.678012	1	0	0	0	0.125855	0.107952	0
DRGX	ENSG00000165606	0.0985452	4.53759	2.18193	0.0127042	0.67811	1	0.678598	0.061542	0.146661	0.141793	0.0325777	0.0178251
NEXN	ENSG00000162614	1.89034	-1.89975	-0.925806	0.0128809	0.685683	1	2.47336	2.66624	2.82822	3.91446	4.06439	8.30316
AC092117.1	ENSG00000276791	0.911086	-1.87821	-0.909358	0.012918	0.685804	1	1.51673	1.55966	0.808577	2.0962	3.44732	2.21908
PHYHIPL	ENSG00000165443	0.0838716	2.0337	1.02411	0.0129999	0.688298	1	0.314875	0.165089	0.220319	0.0760735	0.0582608	0.22952
TRIM55	ENSG00000147573	3.98111	-1.78543	-0.836268	0.0130759	0.688616	1	4.47582	6.03637	6.97929	11.2461	9.43329	13.619
TLE2	ENSG00000065717	0.0362917	2.88552	1.52883	0.0130528	0.688616	1	0.280985	0.0214285	0.0306398	0.0246857	0.0113433	0.0744787
SORCS2	ENSG00000184985	6.17181	-1.42666	-0.512639	0.0132646	0.694842	1	10.245	11.1706	12.574	19.0798	17.9967	15.9265
ZNF891	ENSG00000214029	1.57955	-1.46397	-0.549889	0.0132443	0.694842	1	3.84742	2.56321	2.34552	3.44551	5.44249	4.59815
LINC00663	ENSG00000266904	0.400207	-2.15227	-1.10586	0.0133368	0.69677	1	0.538111	0.554006	0.400967	0.661855	1.2491	1.50954
AC072061.1	ENSG00000259826	0.72046	-2.0946	-1.06668	0.013461	0.699545	1	1.11512	0.915554	0.720964	1.26108	3.18186	1.66027
FOXO4	ENSG00000184481	0.994383	-1.75022	-0.807536	0.0134271	0.699545	1	1.52439	1.4313	1.55449	3.35178	2.42205	2.79999
MAOA	ENSG00000189221	0.217372	-2.11863	-1.08313	0.0135625	0.702968	1	0.230119	0.265433	0.299027	0.277982	1.15813	0.39139
OBSCN	ENSG00000154358	1.34278	-1.40762	-0.493253	0.0136349	0.704864	1	3.13475	2.44643	2.09305	3.45941	4.47667	3.54814
SCNN1D	ENSG00000162572	0.166136	-2.1152	-1.08079	0.0149973	0.712682	1	0.250205	0.287222	0.0947741	0.445416	0.432736	0.550341
RAB3B	ENSG00000169213	1.04374	1.64629	0.719222	0.014442	0.712682	1	3.28061	2.53285	2.76929	2.52507	1.71281	1.39871
JUN	ENSG00000177606	6.24966	-1.79799	-0.846382	0.0150734	0.712682	1	8.52751	6.53924	12.6231	6.02344	20.8129	26.4136
RNU1-122P	ENSG00000202408	4.78313	-3.22793	-1.69061	0.0142757	0.712682	1	3.39769	4.27539	3.80379	2.62681	26.555	10.8973
TMOD4	ENSG00000163157	0.0574928	8.1981	3.03529	0.0151824	0.712682	1	0.402635	0.0241259	0.0919915	0	0.0510849	0
IFI16	ENSG00000163565	0.590971	-1.99932	-0.999512	0.0156203	0.712682	1	1.09132	0.554331	0.776606	1.44167	1.3516	2.29645
AC068057.1	ENSG00000228528	0.133728	-4.38276	-2.13184	0.013961	0.712682	1	0	0.163271	0.0518789	0.376177	0.720237	0.0315266
ZEB2	ENSG00000169554	2.79893	-1.44545	-0.531516	0.014679	0.712682	1	4.54972	5.22066	5.56815	6.7065	7.4169	9.91913
EIF1B-AS1	ENSG00000280739	0.046413	-2.09669	-1.06811	0.0153303	0.712682	1	0.0711794	0.0597111	0.0481624	0.100535	0.0972568	0.202216
FGF5	ENSG00000138675	0.317136	-2.53826	-1.34384	0.0156315	0.712682	1	0.106043	0.518921	0.317994	1.60552	0.478752	0.6785
HPGD	ENSG00000164120	0.199283	2.23828	1.16239	0.0140884	0.712682	1	0.527069	0.554696	0.536423	0.388964	0.289376	0.111765
RETREG1	ENSG00000154153	0.114315	-2.22683	-1.15499	0.0141942	0.712682	1	0.0812233	0.165475	0.148459	0.280335	0.381297	0.315763
SHISAL2B	ENSG00000145642	0.198336	3.24106	1.69646	0.0147727	0.712682	1	0.806758	0.507581	0.354822	0.350841	0.143302	0.0392043
FAXDC2	ENSG00000170271	0.04986	-3.13587	-1.64886	0.0149635	0.712682	1	0.0535548	0.0256721	0.0489435	0.0813295	0.0815382	0.267685
FBLL1	ENSG00000188573	0.122705	-3.03153	-1.60005	0.0155685	0.712682	1	0.119558	0.100295	0.0956055	0.23108	0.318551	0.503525
PDLIM7	ENSG00000196923	3.51003	-1.56176	-0.643171	0.0154933	0.712682	1	7.2885	5.68035	5.37628	7.21792	7.64817	15.3596
AL138824.1	ENSG00000286885	0.189511	-2.66082	-1.41187	0.0150416	0.712682	1	0.263983	0.173997	0.135705	0.255112	0.88757	0.45815
HIST1H2BM	ENSG00000273703	4.17377	-3.5459	-1.82615	0.0144253	0.712682	1	0.556472	6.88552	1.11247	1.8822	31.6303	0.946459
FILIP1	ENSG00000118407	1.31629	-2.07988	-1.0565	0.0152001	0.712682	1	0.756862	1.62202	2.49185	4.85143	1.91156	4.67216
CFAP206	ENSG00000272514	0.0267037	12.7618	3.67376	0.0147086	0.712682	1	0.0877549	0.0858854	0.0467827	0.0141343	0	0
AC004593.2	ENSG00000285081	0.206987	-2.41523	-1.27216	0.0149162	0.712682	1	0.335468	0.281418	0.0838313	0.587604	0.521397	0.672459
EGFR	ENSG00000146648	1.033	1.53471	0.617966	0.0152247	0.712682	1	2.95383	2.10162	3.37727	2.54785	2.00702	1.42719
CYP51A1-AS1	ENSG00000188693	0.255674	-2.68499	-1.42492	0.0140939	0.712682	1	0.152749	0.39723	0.183221	0.369041	1.0853	0.712592
DLX5	ENSG00000105880	10.2783	1.67628	0.74526	0.0149077	0.712682	1	23.6755	29.6002	29.4557	21.4114	19.0566	13.8238
TAS2R4	ENSG00000127364	0.392571	-2.7032	-1.43467	0.0146802	0.712682	1	0.534943	0.317868	0.338653	0.452346	1.12837	1.77636
AC104561.4	ENSG00000287166	0.30776	-2.35855	-1.2379	0.0148401	0.712682	1	0.243297	0.349881	0.416903	1.07484	0.895191	0.675599
ADAM28	ENSG00000042980	0.0266226	-3.44665	-1.78519	0.0155366	0.712682	1	0.0284417	0.0095437	0.0227437	0.0879551	0.111144	0.0276424
SNORD13	ENSG00000239039	12.4334	-2.63851	-1.39973	0.0139082	0.712682	1	16.8186	8.12325	12.634	15.7609	68.8015	19.8132
AC087752.3	ENSG00000253878	2.85077	-1.98172	-0.986755	0.014587	0.712682	1	5.0836	2.69669	3.94558	5.05726	8.1003	11.262
AL354733.1	ENSG00000226877	0.0582902	-4.6746	-2.22484	0.0150382	0.712682	1	0.0428315	0.0179653	0.0342506	0.206961	0.228241	0.0624417
ROR2	ENSG00000169071	0.11684	1.88908	0.917684	0.0154941	0.712682	1	0.468743	0.340286	0.173	0.182939	0.160118	0.201502
SCD	ENSG00000099194	72.5502	1.49121	0.576486	0.015417	0.712682	1	281.29	170.345	156.029	199.11	104.202	129.125
ANKRD13A	ENSG00000076513	3.04706	1.39522	0.480494	0.0138693	0.712682	1	9.89408	7.23525	7.99262	8.0493	4.78433	6.50414
TBX5	ENSG00000089225	0.446073	2.07449	1.05276	0.0146001	0.712682	1	1.29989	0.947779	1.39891	0.880521	0.615003	0.413249
OBI1	ENSG00000152193	6.61337	1.43672	0.522778	0.0154826	0.712682	1	20.6605	13.338	20.3526	15.1609	13.2351	12.3094
CKMT1A	ENSG00000223572	12.7134	1.45514	0.54116	0.0143306	0.712682	1	38.6491	32.2647	33.36	25.2407	23.2118	28.3669
AC122108.1	ENSG00000259187	0.315462	-59.614	-5.89758	0.0144569	0.712682	1	0	0	0	1.93294	0	0.850474
ZNF747	ENSG00000169955	0.818804	-1.69127	-0.75811	0.0142819	0.712682	1	1.21198	1.79619	0.861486	1.74387	1.99733	3.29818
AC012321.1	ENSG00000260772	0.643687	-2.43567	-1.28432	0.0154123	0.712682	1	0.934579	0.616001	0.560508	1.64507	2.87547	0.940755
AC060780.1	ENSG00000267002	1.50856	-1.65694	-0.72852	0.0145434	0.712682	1	2.87796	2.46995	1.98778	3.33517	4.77445	4.79668
AC015936.1	ENSG00000267334	0.236631	-3.68708	-1.88248	0.0153725	0.712682	1	0.257801	0.173012	0.0824613	0.249138	1.14481	0.601336
NME1	ENSG00000239672	48.9179	1.4564	0.54241	0.014063	0.712682	1	133.605	135.164	129.325	124.109	101.94	72.0723
AC125421.1	ENSG00000263574	3.73164	-2.57753	-1.36599	0.0148744	0.712682	1	4.93812	3.02095	4.1385	6.46016	1.7811	24.2482
TEN1-CDK3	ENSG00000261408	0.644934	1.95055	0.963878	0.0147301	0.712682	1	1.55014	1.88214	1.77239	0.565054	1.11105	1.20262
LINC01970	ENSG00000265692	1.02355	-2.08156	-1.05767	0.0147555	0.712682	1	1.28849	1.13003	1.47528	1.69799	3.77118	3.24456
LINC00907	ENSG00000267586	0.589881	-1.92979	-0.948441	0.014262	0.712682	1	0.522207	1.00999	0.858374	0.89717	1.76927	2.37788
GADD45B	ENSG00000099860	2.68015	-2.48066	-1.31072	0.0150991	0.712682	1	5.23098	2.30847	1.46702	2.7552	12.7705	7.08384
NOTCH3	ENSG00000074181	0.341435	1.4955	0.580624	0.0144496	0.712682	1	1.36341	0.666394	0.837971	0.811246	0.730539	0.481853
WTIP	ENSG00000142279	0.0769159	1.98757	0.991007	0.0147924	0.712682	1	0.424406	0.133918	0.112089	0.0978325	0.0760775	0.166505
HSPA12B	ENSG00000132622	0.122352	-2.51159	-1.3286	0.0153173	0.712682	1	0.219934	0.113537	0.067643	0.441435	0.270458	0.345293
AC006946.2	ENSG00000273203	0.0692745	-2.7672	-1.46843	0.0141463	0.712682	1	0.0928266	0.0311482	0.0742296	0.197356	0.164885	0.234567
FBXO9	ENSG00000112146	7.91264	1.37249	0.456797	0.0156906	0.713721	1	25.7034	17.0471	22.4853	21.5018	13.8503	15.7623
OPRD1	ENSG00000116329	0.391763	1.74484	0.803098	0.0158201	0.715623	1	2.12129	0.609032	0.675803	0.827678	0.382844	0.777264
AL513166.1	ENSG00000286863	0.0369325	-3.29553	-1.72051	0.0159548	0.715623	1	0.0412932	0.0415682	0.0066041	0.0558678	0.18337	0.072239
CLK1	ENSG00000013441	6.25761	-1.40782	-0.493464	0.0160317	0.715623	1	14.9477	12.72	8.34585	15.3569	18.5931	19.6891
UNC80	ENSG00000144406	0.0136435	-2.97742	-1.57406	0.0160133	0.715623	1	0.0110092	0.0184709	0.00660273	0.00265982	0.0464441	0.0668741
AC008040.1	ENSG00000239219	0.0160138	-4.13671	-2.04848	0.0158187	0.715623	1	0.0066446	0.0167221	0.00531341	0.0513705	0.0413091	0.0452051
GSTA4	ENSG00000170899	24.0306	1.39225	0.477423	0.016121	0.715623	1	76.8444	53.5855	67.4409	59.1708	41.3388	52.0293
STRIP2	ENSG00000128578	6.55987	1.45583	0.541846	0.0161632	0.715623	1	21.7896	16.2135	16.1838	17.6408	9.57995	12.7449
LPAR1	ENSG00000198121	1.70643	1.53815	0.621196	0.0162079	0.715623	1	4.32035	4.0626	5.4319	3.95348	3.68991	2.19237
LINC00618	ENSG00000225163	0.215856	-3.56835	-1.83526	0.0161832	0.715623	1	0.22716	0.0635201	0.18165	0.292702	0.806995	0.73592
AC004477.1	ENSG00000263412	0.720605	-2.0484	-1.0345	0.016241	0.715623	1	1.04815	1.01572	0.751458	1.17011	2.71245	2.24816
AC087683.2	ENSG00000276174	0.465468	3.72464	1.8971	0.0160293	0.715623	1	1.78848	0.545572	1.56019	0.471376	0	0.632079
ELAVL3	ENSG00000196361	0.046124	-3.64676	-1.86661	0.0162325	0.715623	1	0.0333989	0.00933924	0.0534154	0.118347	0.197751	0.0757406
COPE	ENSG00000105669	9.9721	1.44363	0.529698	0.0159516	0.715623	1	36.5958	18.3888	28.0995	26.7784	13.5084	20.9821
AC092329.1	ENSG00000269107	0.855226	-2.49551	-1.31934	0.0162152	0.715623	1	1.75449	0.542245	0.590733	1.60629	1.64023	4.12833
SLC6A17	ENSG00000197106	2.57376	1.97742	0.983617	0.0165213	0.718072	1	9.02569	2.43896	9.8873	5.56535	2.06431	3.95907
SLC38A3	ENSG00000188338	0.115142	-2.17143	-1.11865	0.0165399	0.718072	1	0.120221	0.201702	0.0961356	0.464723	0.344044	0.181755
TMEM44-AS1	ENSG00000231770	1.25012	-1.88235	-0.912531	0.0165534	0.718072	1	2.30597	1.99051	1.09571	3.64955	3.05718	4.06009
Z84485.1	ENSG00000246982	0.163458	-2.84207	-1.50694	0.0165766	0.718072	1	0.172277	0.0722602	0.206645	0.305228	0.612022	0.474402
ZCWPW1	ENSG00000078487	0.273051	-2.26055	-1.17667	0.0163689	0.718072	1	0.638987	0.227815	0.166066	0.571201	0.468193	1.31969
COL27A1	ENSG00000196739	16.6788	1.53375	0.617064	0.0165957	0.718072	1	56.6546	26.9209	54.4312	34.3801	30.9878	30.7153
TEX22	ENSG00000226174	0.125296	-2.45833	-1.29768	0.0164664	0.718072	1	0.221003	0.139047	0.0589091	0.302567	0.343492	0.429585
AC099811.2	ENSG00000267261	0.119565	-61.7156	-5.94756	0.0166247	0.718072	1	0	0	0	0	0.981541	0
B4GALT5	ENSG00000158470	9.73058	1.35738	0.440826	0.0165232	0.718072	1	33.338	22.4298	24.8189	25.5029	19.3702	18.6224
AL139424.1	ENSG00000271989	0.290372	-2.79647	-1.48361	0.0171292	0.718148	1	0.465531	0.223157	0.159542	1.02831	0.945038	0.517083
PTGER3	ENSG00000050628	0.0161819	-4.23725	-2.08313	0.0173692	0.718148	1	0.0164728	0.00921249	0.00439087	0.0106128	0.0877805	0.0373564
ACP6	ENSG00000162836	1.76172	-1.43475	-0.520801	0.016866	0.718148	1	3.71686	2.90298	3.2903	4.52305	4.04686	6.60629
IGFBP5	ENSG00000115461	0.418777	-1.93961	-0.955763	0.01731	0.718148	1	0.631195	0.6464	0.432635	1.53684	1.31774	0.740928
MUSTN1	ENSG00000272573	0.199519	-4.61297	-2.2057	0.0169236	0.718148	1	0.377521	0	0	0.802637	0.134116	0.807206
RNF4	ENSG00000063978	8.84666	1.36015	0.443766	0.0169585	0.718148	1	25.9119	20.5664	25.8727	21.9567	18.735	16.8444
CTNND2	ENSG00000169862	0.0410961	-2.58354	-1.36935	0.0170263	0.718148	1	0.0145816	0.0733933	0.0291507	0.0422747	0.284909	0.0141718
CD24	ENSG00000272398	0.058789	-3.8543	-1.94647	0.0170868	0.718148	1	0.0342403	0.0287236	0.0547611	0.0661794	0.0760251	0.366059
PHACTR2	ENSG00000112419	3.29444	1.42059	0.506486	0.0173827	0.718148	1	8.76946	9.44426	8.54952	6.42567	6.47571	7.4628
TNS3	ENSG00000136205	1.81663	1.7009	0.766295	0.0173446	0.718148	1	7.28106	3.35257	4.62979	5.11183	2.43297	2.02747
SEC61G	ENSG00000132432	12.8754	1.51746	0.60166	0.0169378	0.718148	1	51.3926	22.0631	34.6766	31.8961	19.525	23.8555
ESRP1	ENSG00000104413	0.0897329	-5.66591	-2.50231	0.0167152	0.718148	1	0.0217452	0.0729667	0.0260831	0.084058	0.280034	0.401548
GPR21	ENSG00000188394	0.129633	-68.1606	-6.09087	0.0173727	0.718148	1	0	0	0	0.656703	0	0.484324
CEP83-DT	ENSG00000278916	0.483042	-2.12646	-1.08845	0.0173382	0.718148	1	0.704727	0.7345	0.392771	0.825509	1.49835	1.8057
NSMCE1-DT	ENSG00000245888	0.218055	-2.23992	-1.16345	0.0167744	0.718148	1	0.350555	0.258786	0.179408	0.392979	0.809486	0.654152
AC138904.3	ENSG00000283662	0.0325096	-6.41048	-2.68043	0.0167877	0.718148	1	0.0197702	0.0165849	0	0.114635	0.0702346	0.0960732
MT1X	ENSG00000187193	14.8829	1.64143	0.714956	0.0172694	0.718148	1	54.9375	36.4055	32.7399	29.4227	26.2768	24.4
LINC00511	ENSG00000227036	0.0681712	-2.25942	-1.17595	0.0173922	0.718148	1	0.0958342	0.0723543	0.0735693	0.0833524	0.294494	0.199322
ST8SIA3	ENSG00000177511	0.0188549	3.37428	1.75458	0.0173512	0.718148	1	0.0564746	0.0775236	0.0205275	0.00992306	0.0319181	0.00498977
Z98749.1	ENSG00000229955	0.291728	-3.72764	-1.89826	0.0172412	0.718148	1	0.391896	0.164377	0.0783458	1.0415	0.174029	1.33309
MID1IP1-AS1	ENSG00000238123	3.16104	-2.15913	-1.11045	0.0170401	0.718148	1	4.65194	4.13895	3.04361	6.13039	8.38831	12.6046
ZEB2-AS1	ENSG00000238057	0.197999	-2.58163	-1.36828	0.017527	0.7222	1	0.118237	0.269222	0.202606	0.391762	0.690069	0.607404
BEST1	ENSG00000167995	0.358171	-2.14581	-1.10153	0.0175837	0.723024	1	0.561276	0.399194	0.419558	0.383228	0.650203	2.05156
KLHL24	ENSG00000114796	3.73053	-1.3934	-0.478613	0.0176609	0.723178	1	6.68524	6.76471	7.58522	9.22011	13.8394	8.75448
BAG1	ENSG00000107262	4.2482	1.48647	0.571888	0.0176308	0.723178	1	12.3648	9.4234	12.9379	12.4201	7.56071	5.53527
PRDM13	ENSG00000112238	0.224058	1.85657	0.892642	0.0178243	0.728355	1	0.436846	0.651489	0.698655	0.484709	0.34487	0.235872
SAMD11	ENSG00000187634	0.906513	2.18275	1.12615	0.0183405	0.729607	1	5.85546	0.820449	1.40166	1.35023	1.03783	1.28385
AL139286.2	ENSG00000271914	0.263745	-5.39974	-2.43289	0.0184226	0.729607	1	0	0.112283	0.214066	0.388052	1.06988	0.780522
TRIB2	ENSG00000071575	4.04518	1.48129	0.566859	0.0184551	0.729607	1	12.0149	10.5733	10.5316	10.6398	8.19806	5.44562
LANCL1-AS1	ENSG00000234281	0.163803	-4.57615	-2.19413	0.0183142	0.729607	1	0.031796	0.0266731	0.203408	0.983282	0.0564784	0.401732
ARPC4	ENSG00000241553	7.9182	1.38606	0.470986	0.0186292	0.729607	1	27.3981	16.6987	21.5332	21.9628	14.0389	14.7204
ZNF860	ENSG00000197385	0.0352568	3.99128	1.99685	0.0185891	0.729607	1	0.109804	0.0921127	0.0878058	0	0.0139316	0.0609819
DUSP7	ENSG00000164086	13.5495	1.41447	0.500265	0.0184536	0.729607	1	50.3673	27.6479	35.0131	39.2416	25.5095	20.6003
LINC02482	ENSG00000251580	0.357836	-2.0431	-1.03076	0.0183721	0.729607	1	0.597111	0.45431	0.366442	1.07357	0.887969	1.12017
HAND2-AS1	ENSG00000237125	0.446269	-1.78084	-0.832557	0.018622	0.729607	1	0.714649	0.777682	0.535509	0.977996	0.905454	1.9647
CPNE5	ENSG00000124772	0.0543044	-2.65837	-1.41054	0.0185359	0.729607	1	0.0275488	0.0693307	0.0587458	0.20411	0.122336	0.142798
AC010132.4	ENSG00000261019	0.160916	-3.07516	-1.62066	0.0184864	0.729607	1	0.0774912	0.195018	0.123933	0.187218	0.757049	0.414224
DOCK5	ENSG00000147459	0.22227	1.55417	0.636144	0.01833	0.729607	1	0.656375	0.542279	0.620309	0.390843	0.412187	0.454283
CRISPLD1	ENSG00000121005	0.755741	1.42276	0.50869	0.0186211	0.729607	1	2.16533	1.84575	2.15975	1.82256	1.86107	1.00698
AP000662.1	ENSG00000254602	0.666708	-2.4882	-1.31511	0.0186328	0.729607	1	0.986732	0.717385	0.539184	0.937681	0.730293	4.10773
GAB2	ENSG00000033327	8.06225	-1.48124	-0.566807	0.0179451	0.729607	1	13.4172	15.9152	14.0762	15.9528	21.3452	31.8895
AC023157.3	ENSG00000276900	1.06316	-2.10532	-1.07404	0.0180353	0.729607	1	1.92926	1.23511	0.994669	1.8399	2.97599	4.29287
NDUFAB1	ENSG00000004779	21.4814	1.47657	0.562245	0.0179207	0.729607	1	78.65	45.1535	55.1444	60.1901	33.1469	36.14
AC006435.1	ENSG00000262456	0.159266	4.10457	2.03723	0.0184028	0.729607	1	0.298614	0.292252	0.67657	0.192386	0	0.145111
KCNJ12	ENSG00000184185	0.0184857	4.18893	2.06658	0.0183043	0.729607	1	0.0971659	0.0163021	0.0466197	0.00939007	0	0.0283306
HDAC5	ENSG00000108840	6.87769	-1.39431	-0.479552	0.0181936	0.729607	1	15.8567	12.2046	11.9678	15.3238	17.5866	26.1832
AP2S1	ENSG00000042753	9.89688	1.4255	0.511471	0.018053	0.729607	1	35.6781	20.4577	26.1922	26.5733	16.7966	18.2598
PROX1	ENSG00000117707	0.904302	-1.82248	-0.865901	0.0187199	0.731562	1	1.19817	1.65695	1.03876	2.02919	3.53482	2.13298
AC091271.1	ENSG00000273702	0.961492	-2.11517	-1.08077	0.0187698	0.73206	1	1.87019	1.22448	0.656568	2.38041	2.47122	3.41361
AC073352.1	ENSG00000272662	0.458347	-3.21477	-1.68471	0.0189963	0.733184	1	0.525833	0.264667	0.33639	0.40653	2.61526	0.817689
SLBP	ENSG00000163950	19.8019	1.37792	0.462494	0.0189054	0.733184	1	65.1015	44.4169	53.9038	51.25	35.1311	40.8233
SPOCK3	ENSG00000196104	0.0605809	2.80705	1.48906	0.0189534	0.733184	1	0.130086	0.119047	0.236418	0.0571428	0.0945275	0.0344809
UQCRQ	ENSG00000164405	9.17797	1.47428	0.560014	0.0189987	0.733184	1	30.5884	22.3523	22.8933	24.9879	16.0665	14.307
AC091057.2	ENSG00000247728	0.947203	-2.28957	-1.19508	0.019022	0.733184	1	1.85787	1.19182	0.393264	1.79544	3.0089	3.29268
ARMCX1	ENSG00000126947	5.57762	-1.48387	-0.569364	0.0190132	0.733184	1	10.0022	9.66702	10.2522	15.8128	14.355	17.8179
AC098582.1	ENSG00000287542	0.027168	63.9875	5.99972	0.0191248	0.734274	1	0	0.205894	0	0	0	0
SBK1	ENSG00000188322	0.0884581	-2.03624	-1.02591	0.0191105	0.734274	1	0.19208	0.0339226	0.129346	0.312632	0.242422	0.206333
SNORD11	ENSG00000238317	1.86415	-3.25198	-1.70132	0.0191768	0.734836	1	1.893	1.05867	1.51375	7.92734	3.92289	4.29287
AC159540.2	ENSG00000277701	2.06963	-1.66241	-0.733279	0.0192603	0.735176	1	4.89319	1.8709	3.57572	4.2784	4.06989	9.50057
FAT2	ENSG00000086570	0.0200363	2.9826	1.57657	0.0192422	0.735176	1	0.0729229	0.0764671	0.017494	0.0281889	0.0161913	0.0141747
RNU6-9	ENSG00000207507	1.03286	-4.39815	-2.1369	0.0193694	0.737911	1	0	0.831105	0.792245	0.957436	3.95956	3.85155
ARHGEF2	ENSG00000116584	21.8382	-1.80067	-0.848532	0.0194122	0.738112	1	25.9722	43.4927	26.5839	30.7841	66.8661	88.9672
SMAD5-AS1	ENSG00000164621	0.232798	2.50135	1.32271	0.019458	0.73843	1	1.05074	0.416239	0.513476	0.423096	0.311066	0.0851009
AL358075.4	ENSG00000278139	0.0786003	58.9112	5.88047	0.0197048	0.739364	1	0.750861	0	0	0	0	0
ZRANB2-AS2	ENSG00000229956	0.147167	-1.8262	-0.868844	0.0196833	0.739364	1	0.306402	0.173349	0.17664	0.361524	0.455654	0.443224
MST1	ENSG00000173531	0.729197	-1.81724	-0.86175	0.01968	0.739364	1	1.06342	1.24192	0.85037	1.66242	3.12967	1.39831
AC046134.2	ENSG00000248932	0.238674	-1.90643	-0.930876	0.0197829	0.739364	1	0.357583	0.368442	0.279729	0.785039	0.431498	0.849948
AKR1B1	ENSG00000085662	21.4169	1.35477	0.438051	0.0196885	0.739364	1	60.8371	55.8904	58.0446	60.3347	42.8748	37.1203
CALML3-AS1	ENSG00000205488	0.0241616	-3.42061	-1.77425	0.0197578	0.739364	1	0.00575817	0.0289826	0.0184183	0.033388	0.0460263	0.128716
AL133367.1	ENSG00000260285	0.278712	-2.05015	-1.03573	0.019752	0.739364	1	0.534867	0.273592	0.312959	0.731214	0.463448	1.21718
BBC3	ENSG00000105327	3.35873	-1.73575	-0.79556	0.0197813	0.739364	1	4.85036	5.57899	4.95826	4.91288	11.4134	12.3116
BHLHE41	ENSG00000123095	16.991	1.49082	0.576102	0.019831	0.739755	1	50.4459	38.3148	50.3364	44.0857	29.7912	27.3746
IKZF1	ENSG00000185811	0.135517	2.09779	1.06887	0.0199245	0.740428	1	0.475633	0.439715	0.209577	0.239206	0.137935	0.193397
AL358113.1	ENSG00000285130	0.494744	1.93683	0.953695	0.0199618	0.740428	1	1.6788	0.877648	1.53703	0.752412	1.11285	0.396083
LDLR	ENSG00000130164	3.3199	1.61149	0.688391	0.0199039	0.740428	1	14.4906	6.78657	6.86465	9.04596	3.92798	5.38639
TNNT2	ENSG00000118194	3.57812	-1.72644	-0.787799	0.020062	0.742745	1	5.42168	5.15982	5.98656	14.4278	4.10349	12.6436
AL137802.2	ENSG00000261135	0.857156	-2.38336	-1.253	0.0201689	0.745166	1	1.09828	1.32191	0.458217	0.738347	3.90169	2.59893
TRMO	ENSG00000136932	2.8808	1.47614	0.561834	0.020203	0.745166	1	7.66748	7.59582	8.13818	6.65421	5.52173	5.07423
INHBB	ENSG00000163083	0.102592	2.28173	1.19013	0.0204679	0.745263	1	0.826637	0.0554761	0.0661028	0.175749	0.0293666	0.192818
ALDH1L1	ENSG00000144908	0.0197795	-3.22552	-1.68953	0.020396	0.745263	1	0.00773104	0.0162136	0.0216377	0.0224137	0.113292	0.0300551
C8orf76	ENSG00000189376	3.00449	1.46794	0.553791	0.0204705	0.745263	1	7.22386	8.30508	8.71713	6.07693	6.49306	5.45596
AL139339.2	ENSG00000273485	0.350098	3.32833	1.7348	0.0203321	0.745263	1	1.53284	0.338387	1.09672	0.545753	0.071651	0.313634
INHBC	ENSG00000175189	0.211376	-2.38968	-1.25682	0.0203823	0.745263	1	0.413835	0.208295	0.119134	0.543903	0.382243	0.900939
TECR	ENSG00000099797	8.92241	1.42815	0.51415	0.0203113	0.745263	1	34.0002	17.3289	23.2726	27.2656	12.7841	15.6491
DLGAP4-AS1	ENSG00000232907	0.0951892	-3.24995	-1.70042	0.0204543	0.745263	1	0.121291	0	0.113156	0.117215	0.394982	0.294705
AC119673.2	ENSG00000286619	0.0121267	-5.57567	-2.47915	0.0208875	0.749729	1	0.00850786	0	0.00680339	0.0164439	0.0453368	0.0413438
GK5	ENSG00000175066	1.30815	1.5169	0.601123	0.0208276	0.749729	1	4.42173	3.87409	2.52712	1.96995	2.45782	3.10962
ITPR3	ENSG00000096433	0.187465	2.01062	1.00764	0.0207595	0.749729	1	1.01497	0.292823	0.322075	0.295816	0.267091	0.260965
DAB2IP	ENSG00000136848	6.44976	1.38011	0.464788	0.0207614	0.749729	1	24.7511	12.2524	16.9596	17.2744	11.4605	12.7107
NRL	ENSG00000129535	23.8753	1.60756	0.684872	0.0207349	0.749729	1	72.9592	40.6933	82.2105	38.882	22.5015	68.3936
STARD5	ENSG00000172345	0.222478	-1.9854	-0.989429	0.0208638	0.749729	1	0.468248	0.252517	0.200592	0.355546	0.868866	0.66638
IL2RG	ENSG00000147168	0.772561	-2.24743	-1.16828	0.0208144	0.749729	1	0.249656	1.44992	0.921415	1.93014	1.73972	2.98634
PCDH19	ENSG00000165194	0.0123887	-3.89297	-1.96087	0.0208977	0.749729	1	0.00543296	0.0136728	0.00434452	0.0105008	0.0820285	0.0105606
AC079328.2	ENSG00000259627	0.235417	-3.37094	-1.75315	0.0211051	0.755215	1	0.230119	0.193042	0.122678	0.5189	0.74938	0.745506
Z69706.1	ENSG00000268836	0.600011	2.85471	1.51334	0.021128	0.755215	1	2.71318	1.46317	0.929838	0.842789	0.17212	0.847587
LRP3	ENSG00000130881	5.78779	1.39425	0.479491	0.0211657	0.755215	1	19.8492	15.2955	12.7964	15.9916	11.9844	8.90373
EPHX1	ENSG00000143819	9.48044	1.52972	0.613272	0.0212627	0.755938	1	31.7643	24.5014	22.1051	22.2006	17.8501	14.871
AC009509.1	ENSG00000256377	0.138057	-2.58905	-1.37242	0.0212323	0.755938	1	0.170431	0.114377	0.136286	0.428229	0.393551	0.364411
MRPS10	ENSG00000048544	33.6464	1.35621	0.439583	0.0213362	0.757008	1	101.086	85.0323	89.594	82.3712	63.2819	73.3713
GPX4	ENSG00000167468	12.2403	1.3627	0.446469	0.0213696	0.757008	1	36.4386	26.6697	37.1158	28.3387	22.8962	27.9898
AC104187.1	ENSG00000271937	0.407382	-2.80746	-1.48927	0.0215817	0.76178	1	0.433039	0.508576	0.20777	0.753277	1.61531	1.09426
ISM1	ENSG00000101230	0.225338	2.65018	1.40609	0.0215762	0.76178	1	0.754749	0.518028	0.589825	0.530463	0.16758	0.0666853
U73166.1	ENSG00000230454	0.280948	-2.00541	-1.0039	0.0216792	0.762233	1	0.5048	0.372652	0.258347	0.56589	0.968394	0.86348
HHIP-AS1	ENSG00000248890	0.301396	-2.05922	-1.0421	0.0217106	0.762233	1	0.467755	0.475	0.236238	0.975446	0.940182	0.669951
TFDP1	ENSG00000198176	25.6214	1.39511	0.480376	0.021683	0.762233	1	89.4867	58.1216	64.9361	73.2771	44.4846	45.4879
NKX3-1	ENSG00000167034	0.667004	1.90253	0.927919	0.0218411	0.765206	1	2.40927	1.34288	1.79729	1.51575	1.12014	0.487171
HACD3	ENSG00000074696	40.5044	1.38521	0.4701	0.021873	0.765206	1	148.8	85.6847	103.037	106.755	72.3027	80.067
AL353803.4	ENSG00000261334	0.0989614	-3.97004	-1.98915	0.0219526	0.76557	1	0.0822192	0.0229907	0.0876631	0.0794563	0.462471	0.292998
ABCA6	ENSG00000154262	0.0545175	-2.16445	-1.114	0.0219649	0.76557	1	0.074875	0.072233	0.053887	0.101302	0.202822	0.160096
LTBP4	ENSG00000090006	3.99369	-1.50464	-0.589422	0.022	0.76557	1	11.0741	5.00687	5.98556	11.6306	7.73934	15.1468
SNAP25	ENSG00000132639	0.91231	2.03773	1.02696	0.022081	0.767031	1	4.9262	1.01988	1.98226	2.21248	0.757234	1.04349
FBXO5	ENSG00000112029	14.6233	1.41382	0.499601	0.0221725	0.767505	1	48.1929	29.266	43.2425	36.491	25.979	29.0971
CAMTA2	ENSG00000108509	1.98365	-1.419	-0.504871	0.0221537	0.767505	1	4.04879	4.23081	2.89981	4.75483	6.24588	5.97951
AL158212.2	ENSG00000233547	1.19862	-2.24154	-1.16449	0.0222169	0.76769	1	1.15226	1.54658	1.47426	2.00437	4.60513	3.58361
AC097382.3	ENSG00000287104	1.64817	-1.86784	-0.901368	0.0224929	0.769984	1	2.91021	1.68091	2.51793	3.41178	5.16932	5.51775
PSKH2	ENSG00000147613	0.152803	2.50938	1.32733	0.0226216	0.769984	1	0.329331	0.383708	0.512074	0.159132	0.227493	0.142256
SNORD14B	ENSG00000201403	1.07295	46.4841	5.53866	0.0225709	0.769984	1	2.94467	2.96427	2.82567	0	0	0
DAZAP2	ENSG00000183283	11.4428	1.39664	0.481959	0.0226351	0.769984	1	42.5112	22.0768	30.859	33.4171	19.2865	20.2111
LINC02321	ENSG00000258884	0.23965	-2.53513	-1.34206	0.0223936	0.769984	1	0.207497	0.270769	0.258108	0.378768	0.982856	0.67222
EZH1	ENSG00000108799	3.99502	-1.3922	-0.477366	0.0225318	0.769984	1	8.1918	7.61005	7.0844	9.96895	12.6512	11.5812
AATK	ENSG00000181409	1.06566	-1.39511	-0.480381	0.0224023	0.769984	1	2.45772	1.94701	1.75305	3.50634	2.52575	3.15881
AC011815.2	ENSG00000274184	0.0598676	-6.13936	-2.61809	0.0224256	0.769984	1	0.0524532	0.022001	0	0.278798	0.209635	0.0254896
BID	ENSG00000015475	3.77131	1.40073	0.486175	0.0226112	0.769984	1	11.6356	9.54088	9.79071	9.62012	7.70814	6.51172
FECH	ENSG00000066926	2.99703	1.47149	0.557275	0.022684	0.770316	1	9.15424	6.31581	9.11773	8.82327	4.61517	4.72157
AC098650.1	ENSG00000283563	0.0275874	46.4649	5.53807	0.0228572	0.774863	1	0.0299881	0.113204	0.0719408	0	0	0
KLHL41	ENSG00000239474	69.6464	-1.62301	-0.698668	0.0230574	0.780305	1	77.6622	108.509	147.781	307.768	97.2266	201.312
SPTBN2	ENSG00000173898	17.8485	1.40444	0.489991	0.0231645	0.782588	1	61.2451	44.782	41.817	29.1104	28.5664	53.1818
MYO15B	ENSG00000266714	0.0287118	-2.36402	-1.24124	0.0232239	0.783251	1	0.0404333	0.0305269	0.0258663	0.0742416	0.107731	0.0628752
SNORD118	ENSG00000200463	14.1816	-2.48848	-1.31526	0.0232721	0.783533	1	12.6577	15.2638	16.1316	11.4678	81.1512	26.1417
GRIK1-AS1	ENSG00000174680	0.0287672	-5.18124	-2.3733	0.0233337	0.784267	1	0	0.00965561	0.0276124	0.0667398	0.153338	0.0223733
KCNK2	ENSG00000082482	1.90758	1.74601	0.80406	0.0234576	0.785749	1	7.26602	3.70724	4.97564	4.66377	1.86613	3.18836
PGF	ENSG00000119630	0.102379	-2.18382	-1.12686	0.0234207	0.785749	1	0.164382	0.0995922	0.109541	0.19416	0.535309	0.133135
CHRND	ENSG00000135902	1.97158	-2.09375	-1.06609	0.0237223	0.789476	1	1.54003	2.52701	3.3291	6.08394	2.17938	8.8818
GRIA2	ENSG00000120251	0.00839499	-9.52835	-3.25223	0.0237594	0.789476	1	0	0.00497306	0	0.0229159	0.0368553	0.0115232
AL139089.1	ENSG00000273723	0.988272	-1.99412	-0.995754	0.0237526	0.789476	1	2.28325	0.912084	0.91291	2.10145	3.428	2.90594
AC026464.3	ENSG00000260371	3.09132	2.09309	1.06564	0.0238093	0.789476	1	6.67249	8.12022	9.99507	7.71975	3.50556	2.00943
HEXIM1	ENSG00000186834	9.29013	-1.44758	-0.533639	0.0236541	0.789476	1	17.9477	17.4151	15.3293	18.9809	39.9743	19.8617
RTBDN	ENSG00000132026	0.0780842	2.60827	1.3831	0.0237714	0.789476	1	0.297219	0.149599	0.205984	0.0382974	0.035196	0.192577
ATP5MF	ENSG00000241468	25.9994	1.55788	0.639586	0.0239131	0.790255	1	96.9682	50.5229	69.4557	68.9876	41.4464	38.2452
TPM1	ENSG00000140416	8.37672	-1.52313	-0.607035	0.0238886	0.790255	1	15.2023	12.7239	16.5722	18.1075	14.897	39.3478
RGS8	ENSG00000135824	0.024142	-3.77806	-1.91765	0.0241946	0.790545	1	0.0158576	0.019954	0.0126807	0.0996106	0.0915439	0.0154119
AC092803.3	ENSG00000287445	0.137805	-2.68003	-1.42225	0.0242429	0.790545	1	0.153457	0.0772393	0.171798	0.38558	0.408871	0.387775
DPP3	ENSG00000254986	6.45785	1.5934	0.672111	0.0240768	0.790545	1	21.8573	14.3779	17.1906	15.8292	6.7351	13.3287
AP000866.1	ENSG00000245498	0.150195	-1.79005	-0.840002	0.0242364	0.790545	1	0.329469	0.178588	0.178344	0.406569	0.373645	0.512336
PEBP1	ENSG00000089220	87.1033	1.40836	0.494016	0.0241768	0.790545	1	301.079	180.353	240.453	256.148	148.811	145.799
AC005785.1	ENSG00000268189	0.236869	-2.49431	-1.31864	0.0242109	0.790545	1	0.194154	0.116337	0.421411	0.402063	0.911441	0.700877
Z98752.4	ENSG00000282876	0.166721	-5.09451	-2.34894	0.0242117	0.790545	1	0.180286	0.0756192	0	0.435568	0.80059	0.175219
ADM2	ENSG00000128165	0.402531	-2.95796	-1.5646	0.0241837	0.790545	1	0.0741487	0.41468	0.56329	0.0835999	0.779274	2.59434
LHFPL2	ENSG00000145685	2.48109	1.358	0.441481	0.0244279	0.791022	1	8.28582	6.54949	5.66941	5.93972	5.35248	4.8434
TIMM10	ENSG00000134809	23.0725	1.40819	0.493844	0.0244718	0.791022	1	65.2304	64.0604	58.935	50.2327	48.1667	46.0045
AL139082.1	ENSG00000273523	0.0878779	-2.69286	-1.42914	0.0244499	0.791022	1	0.154396	0.0647598	0.0493855	0.298414	0.233111	0.225085
ETFA	ENSG00000140374	19.2411	1.38102	0.465729	0.024469	0.791022	1	64.2198	41.7166	53.0551	45.0553	34.2982	43.5616
AC007192.1	ENSG00000268173	0.0239742	59.3417	5.89098	0.0244569	0.791022	1	0	0	0.181344	0	0	0
AC010619.1	ENSG00000269469	0.183379	-57.3801	-5.84248	0.0245061	0.791022	1	0	0	0	0	0.209221	1.37372
ZNF460-AS1	ENSG00000267871	0.465098	-2.17808	-1.12306	0.0245387	0.791022	1	0.723379	0.551664	0.446989	0.953278	1.48934	1.53393
ATAD3A	ENSG00000197785	8.58247	1.47349	0.559242	0.0254065	0.791039	1	35.4734	14.0679	22.7896	22.6857	11.9517	17.0688
KANK4	ENSG00000132854	0.0189234	3.66103	1.87225	0.0255223	0.791039	1	0.140016	0.0261016	0.0062203	0.0150346	0.0138171	0.0151202
WDR78	ENSG00000152763	0.133639	-1.94522	-0.959932	0.02526	0.791039	1	0.198576	0.233215	0.120683	0.33775	0.28218	0.532668
TLCD4	ENSG00000152078	0.150963	-1.56942	-0.650234	0.0255874	0.791039	1	0.36604	0.198689	0.218095	0.49246	0.382462	0.425509
EXOC8	ENSG00000116903	5.95058	1.36951	0.453655	0.025302	0.791039	1	19.4348	12.8423	16.8044	14.9952	13.8178	9.69683
EPAS1	ENSG00000116016	1.39828	1.55193	0.634062	0.0256025	0.791039	1	6.25928	2.18326	3.4415	2.79614	2.80214	2.36694
OTX1	ENSG00000115507	0.273029	1.92816	0.947225	0.0248156	0.791039	1	1.22831	0.506006	0.587586	0.519329	0.457793	0.277131
TTN-AS1	ENSG00000237298	0.014121	-2.56338	-1.35805	0.0251819	0.791039	1	0.0145438	0.00522882	0.0232602	0.0562204	0.0258338	0.0403861
SHOX2	ENSG00000168779	2.03094	-1.4875	-0.57289	0.0254957	0.791039	1	3.67718	3.64879	3.54539	4.93445	5.94382	6.53503
SLC34A2	ENSG00000157765	0.0402494	-2.44444	-1.2895	0.0249449	0.791039	1	0.0210125	0.0616945	0.042007	0.142145	0.102641	0.10211
NOCT	ENSG00000151014	20.2691	1.45729	0.543287	0.0255017	0.791039	1	45.7455	54.111	63.0883	40.13	54.9267	27.7874
ISOC1	ENSG00000066583	21.5581	1.37371	0.458082	0.025305	0.791039	1	62.0381	62.1627	51.901	55.3112	45.2809	38.3308
AL049697.1	ENSG00000213204	0.142481	-2.76194	-1.46568	0.0256306	0.791039	1	0.25526	0.0125961	0.156092	0.217661	0.706787	0.277273
MAPK15	ENSG00000181085	0.765729	-1.89615	-0.923071	0.0248264	0.791039	1	1.14025	1.2704	0.797837	1.92839	2.70581	1.90474
WNK2	ENSG00000165238	1.80592	1.5207	0.604739	0.0255087	0.791039	1	7.97991	2.79627	4.55067	5.20068	2.64657	2.75566
ZMYND19	ENSG00000165724	9.83352	1.35743	0.440874	0.0253057	0.791039	1	31.8866	24.8345	24.3466	27.0033	19.5226	17.7027
ZEB1-AS1	ENSG00000237036	2.4478	-1.70009	-0.765611	0.0249463	0.791039	1	4.85973	4.50284	2.41511	6.06289	5.07202	9.98
AL391839.2	ENSG00000233825	0.515236	-3.00826	-1.58893	0.0247076	0.791039	1	0.276783	0.464377	0.55333	1.20367	1.72075	1.47953
VCL	ENSG00000035403	19.4735	-1.53852	-0.621539	0.0252267	0.791039	1	33.4935	36.9748	31.7125	34.6287	40.8559	92.1919
COMMD9	ENSG00000110442	1.92362	1.50784	0.592484	0.0256962	0.791039	1	7.19638	3.26466	5.59391	5.4704	2.59225	3.30561
TMEM109	ENSG00000110108	21.842	1.35949	0.443067	0.0257039	0.791039	1	69.6468	54.1809	55.9912	63.3993	40.1358	39.1963
IRAK4	ENSG00000198001	0.907159	1.51085	0.595361	0.0254381	0.791039	1	3.71	1.70621	2.22128	2.13846	1.74784	1.4368
MYO1E	ENSG00000157483	3.62564	-1.37661	-0.46112	0.0248728	0.791039	1	8.28607	6.7502	6.32251	7.88912	9.04984	14.2222
NATD1	ENSG00000274180	3.63351	-1.50085	-0.585782	0.0251972	0.791039	1	5.91202	7.89912	5.41525	9.51533	9.25074	12.4842
UNC45B	ENSG00000141161	1.02635	-2.11805	-1.08274	0.0254414	0.791039	1	0.709333	1.09614	1.90319	5.42083	1.36773	2.16798
RND2	ENSG00000108830	0.773736	1.96353	0.973446	0.0249191	0.791039	1	3.31275	1.47603	1.75634	1.78248	0.754402	0.978869
ASB16	ENSG00000161664	0.208005	-2.55113	-1.35114	0.0252194	0.791039	1	0.118683	0.238947	0.265737	0.573475	0.61136	0.59981
SOX9	ENSG00000125398	1.64148	-1.6477	-0.720452	0.0253748	0.791039	1	3.14168	2.14912	2.79261	2.37155	4.76615	6.90616
ZNF844	ENSG00000223547	0.0123028	-4.21748	-2.07638	0.0252297	0.791039	1	0	0.00674926	0.0128674	0.046651	0.0357276	0.0234583
TFRC	ENSG00000072274	21.5723	1.49341	0.578612	0.0257862	0.792333	1	97.208	50.4143	35.8865	55.7839	31.963	40.384
TRMT10C	ENSG00000174173	18.1038	1.39895	0.484346	0.0261107	0.793636	1	51.624	40.3768	55.7628	43.5476	41.822	29.2609
RFX3	ENSG00000080298	6.56081	-1.45624	-0.542245	0.0260741	0.793636	1	12.6186	12.3929	11.0241	14.2446	19.8558	22.0789
FOLH1	ENSG00000086205	0.0949584	2.14672	1.10213	0.0260346	0.793636	1	0.34773	0.133351	0.309844	0.163222	0.150004	0.0772475
NEDD8	ENSG00000129559	11.4381	1.41646	0.502295	0.0259298	0.793636	1	43.2346	24.5979	27.7344	31.2585	22.9718	17.5886
COASY	ENSG00000068120	6.37361	1.37121	0.455449	0.025976	0.793636	1	21.5854	14.6008	16.5462	17.6333	13.9053	9.76117
ZNF528-AS1	ENSG00000269834	0.443127	-2.02119	-1.01521	0.0260432	0.793636	1	0.84337	0.669038	0.315213	0.646708	0.879292	2.28973
AL110114.1	ENSG00000286787	0.0417853	-2.6731	-1.41851	0.0260822	0.793636	1	0.0351765	0.0590179	0.0281292	0.0951844	0.0937245	0.17094
CDCA4	ENSG00000170779	15.9697	1.41478	0.500581	0.0263227	0.797619	1	38.1724	42.4843	48.168	32.0352	42.6711	24.8734
CTCFL	ENSG00000124092	0.155242	1.47827	0.563913	0.0263114	0.797619	1	0.308715	0.408384	0.522218	0.304078	0.274181	0.346199
AL365226.1	ENSG00000224349	0.580023	-2.84554	-1.5087	0.0265504	0.798383	1	0.303748	0.509617	0.728684	1.76124	2.15815	1.03324
DDC	ENSG00000132437	0.0646649	2.86864	1.52037	0.0267072	0.798383	1	0.120307	0.201847	0.19241	0.0996553	0.0457925	0.0501113
CORO2A	ENSG00000106789	2.63338	1.43729	0.523355	0.0264606	0.798383	1	8.06098	6.42761	7.12105	7.01916	4.72889	4.50774
CEL	ENSG00000170835	0.163742	-2.21264	-1.14577	0.0266041	0.798383	1	0.222332	0.223813	0.142232	0.343777	0.414668	0.648252
CLEC2B	ENSG00000110852	0.201594	-2.48591	-1.31377	0.0264502	0.798383	1	0.140647	0.337105	0.144604	0.388346	0.945777	0.371029
AC018521.5	ENSG00000264920	0.557248	-1.85699	-0.892962	0.0267128	0.798383	1	0.909623	0.794002	0.697899	1.23543	1.9105	1.61281
TMC8	ENSG00000167895	0.0678947	-2.85531	-1.51365	0.0266107	0.798383	1	0.0679663	0.0325804	0.0854069	0.0750655	0.327686	0.169859
MEX3D	ENSG00000181588	5.17418	1.37959	0.464245	0.0265834	0.798383	1	19.5836	10.2813	13.3699	14.1806	10.5381	8.60381
GP1BB	ENSG00000203618	0.961344	2.39792	1.26178	0.026672	0.798383	1	4.16387	1.60334	2.37444	1.74811	1.84904	0
LRRC38	ENSG00000162494	0.616437	1.81873	0.862928	0.0270142	0.798647	1	2.61597	0.676806	1.91593	1.13408	0.260561	1.59201
PPIH	ENSG00000171960	12.3592	1.36951	0.453659	0.0271149	0.798647	1	38.2684	31.1187	32.1259	31.598	25.8488	22.444
LINC01750	ENSG00000231437	0.0472513	-3.58033	-1.84009	0.0269307	0.798647	1	0.044293	0.0123855	0.0472257	0.142682	0.0393382	0.229591
KCNN3	ENSG00000143603	2.00686	-1.82877	-0.87087	0.0280696	0.798647	1	1.94882	2.71055	3.88663	9.31872	2.1289	6.07233
AL357568.2	ENSG00000271917	0.200715	2.43821	1.28582	0.027085	0.798647	1	0.80362	0.351727	0.530862	0.371425	0.21722	0.135832
Z99572.1	ENSG00000213062	0.453285	-1.71234	-0.775966	0.0283765	0.798647	1	0.559835	0.866777	0.648981	0.947697	1.51832	1.4059
APLF	ENSG00000169621	0.634595	-1.59936	-0.677499	0.0278461	0.798647	1	0.840743	1.32943	0.94599	1.38051	2.0022	2.0464
SOWAHC	ENSG00000198142	28.6753	1.35926	0.442821	0.028343	0.798647	1	75.1587	56.7453	100.755	69.489	56.9129	60.0315
FAM162A	ENSG00000114023	7.98519	1.40717	0.492797	0.0276963	0.798647	1	26.7605	16.4469	22.7961	20.608	13.6893	15.9718
PDLIM5	ENSG00000163110	6.50772	-1.34907	-0.431964	0.0279	0.798647	1	14.1758	12.8501	11.8403	15.2144	16.3849	24.3451
DCHS2	ENSG00000197410	0.00385806	-8.14347	-3.02564	0.0284229	0.798647	1	0	0	0.00254443	0.00614994	0.00847786	0.0185548
EMB	ENSG00000170571	0.388708	1.39802	0.483386	0.0283088	0.798647	1	1.23406	1.02675	0.938296	0.664724	0.7726	1.01259
HMGCR	ENSG00000113161	9.6537	1.46661	0.552486	0.0285495	0.798647	1	36.7672	21.0916	22.8577	28.0561	14.0307	16.5331
AC026691.1	ENSG00000270021	0.279895	-2.14981	-1.10421	0.0279324	0.798647	1	0.499294	0.264536	0.294195	0.482515	0.863542	1.04715
SGCD	ENSG00000170624	5.31621	-1.36814	-0.452213	0.027488	0.798647	1	9.35482	9.8263	11.5374	15.3514	13.659	16.7334
RPS10-NUDT3	ENSG00000270800	3.69408	1.4547	0.540718	0.0285552	0.798647	1	11.2067	11.0926	7.99734	9.2536	5.16553	8.0162
AL159163.1	ENSG00000249141	0.184198	52.701	5.71976	0.0270826	0.798647	1	0.26502	1.18571	0	0	0	0
AQP1	ENSG00000240583	7.52964	1.5709	0.651588	0.0281925	0.798647	1	29.4329	13.9889	19.6876	20.1254	9.79581	12.7437
CADPS2	ENSG00000081803	0.579111	1.80931	0.855439	0.0268075	0.798647	1	1.19082	1.3692	2.07098	0.675996	1.15376	0.971207
MAFA	ENSG00000182759	0.395817	-2.61752	-1.3882	0.0284407	0.798647	1	0.637698	0.361881	0.239972	0.435013	1.83235	1.0755
AL445623.1	ENSG00000233906	0.31971	-5.57339	-2.47856	0.0278547	0.798647	1	0	0.375224	0	0.64839	0.79451	1.30416
SHC3	ENSG00000148082	0.00753502	-3.92653	-1.97326	0.0284269	0.798647	1	0	0.00445532	0.00849401	0.0410604	0.0141507	0.0103235
AL138762.1	ENSG00000272572	0.443093	-2.1762	-1.12181	0.0268966	0.798647	1	0.777089	0.570401	0.310703	0.970011	1.55286	1.25875
MRVI1	ENSG00000072952	0.0105988	-6.02348	-2.5906	0.0278364	0.798647	1	0.0137673	0	0	0.0399139	0.0122272	0.0401411
DCDC1	ENSG00000170959	0.00832603	-3.58157	-1.84059	0.0274933	0.798647	1	0.00805532	0.00337873	0.0064415	0.0272462	0.0357711	0.00782894
AP000442.1	ENSG00000255139	0.0841071	-3.13382	-1.64792	0.0272687	0.798647	1	0.0293814	0.049295	0.117475	0.170364	0.182662	0.371224
CSKMT	ENSG00000214756	7.27251	-1.41199	-0.497734	0.0277619	0.798647	1	16.8415	12.6482	12.1233	17.739	21.446	23.1613
DIXDC1	ENSG00000150764	1.86488	1.39229	0.477456	0.0282403	0.798647	1	6.06801	4.3368	4.97289	5.20848	3.72112	2.97316
ERBB3	ENSG00000065361	6.06384	-1.47809	-0.563736	0.0282937	0.798647	1	10.1798	10.522	11.7557	25.2686	10.3586	17.0176
AL590787.1	ENSG00000260509	0.101796	-4.33751	-2.11687	0.0276306	0.798647	1	0.0806144	0.101439	0	0.116858	0.357983	0.391745
APH1B	ENSG00000138613	2.21662	-1.49174	-0.576995	0.0277039	0.798647	1	4.49896	3.73325	3.66772	7.57567	5.40542	6.1329
AC091544.7	ENSG00000275965	0.532108	-3.20301	-1.67943	0.0281547	0.798647	1	0.440476	0.123169	0.704462	0.99324	1.56481	1.99779
AC092143.1	ENSG00000198211	0.0831313	-8.77666	-3.13367	0.0276802	0.798647	1	0	0.0640693	0	0.738081	0	0
ALYREF	ENSG00000183684	54.9658	1.48715	0.572545	0.0281957	0.798647	1	210.409	110.304	139.07	144.317	78.3885	105.307
LRRC45	ENSG00000169683	3.34721	1.61029	0.687323	0.0285942	0.798647	1	12.4456	5.65211	9.8228	10.2645	4.35079	4.03194
DLGAP1-AS2	ENSG00000262001	0.180435	-2.40652	-1.26695	0.0272141	0.798647	1	0.133722	0.252398	0.200497	0.226149	0.475052	0.844765
TXNL4A	ENSG00000141759	9.3761	1.32793	0.409175	0.0285937	0.798647	1	29.9716	24.35	22.8865	26.9713	19.2558	16.4507
AC008878.3	ENSG00000268861	0.960166	1.62513	0.700551	0.0280215	0.798647	1	3.50654	1.90658	2.58335	2.4474	1.32645	1.48311
AC010336.8	ENSG00000286138	1.02837	-2.01686	-1.01211	0.0279783	0.798647	1	1.38314	1.03598	1.61956	1.67083	3.81687	3.26466
LGI4	ENSG00000153902	0.0833899	-2.47624	-1.30815	0.0286274	0.798647	1	0.070173	0.0490557	0.140286	0.169537	0.25968	0.284171
RYR1	ENSG00000196218	7.08894	-1.34236	-0.424777	0.0268673	0.798647	1	14.1266	15.1287	12.6239	21.2399	20.6934	18.9311
AC010271.2	ENSG00000277453	0.820747	-2.75505	-1.46208	0.0285997	0.798647	1	1.35214	0.756192	0.360418	1.21959	2.88213	2.89112
C19orf73	ENSG00000221916	0.925466	-2.18296	-1.12629	0.0275149	0.798647	1	1.42868	1.37827	0.628351	1.0355	3.29904	3.54075
AL121845.1	ENSG00000229299	0.442212	3.0094	1.58948	0.0278027	0.798647	1	2.36323	0.755229	0.719917	0.65252	0.0999463	0.546862
OSBP2	ENSG00000184792	3.94969	1.38006	0.464734	0.0268844	0.798647	1	10.9093	9.70138	11.5549	10.5427	8.49645	6.35386
BEX4	ENSG00000102409	1.35786	-1.42951	-0.515519	0.0273805	0.798647	1	2.94915	2.13509	2.51985	4.13843	3.87505	3.65156
RENBP	ENSG00000102032	0.0769753	-2.92797	-1.5499	0.0276238	0.798647	1	0.0776805	0.0868864	0.0414119	0.22521	0.114985	0.327156
AL445228.2	ENSG00000271387	0.645716	-2.23362	-1.15938	0.0288358	0.799564	1	0.723794	0.840708	0.712355	1.39894	2.37351	1.73158
SYNGAP1-AS1	ENSG00000274259	0.478676	-2.56307	-1.35787	0.0288517	0.799564	1	1.1567	0.285392	0.163229	1.24934	1.0273	1.85161
ZFHX2	ENSG00000136367	0.232407	-1.75002	-0.807373	0.0288036	0.799564	1	0.486465	0.373356	0.215195	0.665167	0.813535	0.508002
TGFB1I1	ENSG00000140682	0.312744	-2.07514	-1.05321	0.0287687	0.799564	1	0.470885	0.502001	0.258876	0.521424	0.609889	1.56364
AC009831.1	ENSG00000263823	0.578504	-2.0532	-1.03787	0.0288632	0.799564	1	0.670088	0.815081	0.723387	1.23038	2.321	1.36764
LINC02815	ENSG00000282111	0.697656	-2.81383	-1.49254	0.0290725	0.799736	1	0.723878	0.607249	0.643173	0.466369	2.71448	2.73597
LAMP1	ENSG00000185896	18.3757	1.34788	0.430687	0.0290031	0.799736	1	67.3236	38.5856	47.1766	50.6518	34.3487	35.9192
AC009139.1	ENSG00000260922	0.397103	-2.19374	-1.13339	0.0289545	0.799736	1	0.309422	0.648921	0.445378	1.10639	1.01679	1.29312
ARHGAP23	ENSG00000275832	0.769672	-1.76649	-0.820885	0.0289643	0.799736	1	0.839667	1.55734	1.02815	1.19182	2.37704	3.00926
BMP7	ENSG00000101144	12.3434	1.37703	0.461557	0.029049	0.799736	1	49.8091	23.0558	30.9157	30.5165	19.3418	29.3134
NUP210	ENSG00000132182	0.0269522	1.94027	0.956254	0.0292848	0.804455	1	0.0970177	0.0651091	0.0620648	0.0437535	0.0574432	0.0188582
CELF6	ENSG00000140488	0.0470664	-3.25535	-1.70281	0.0293921	0.805154	1	0.0879491	0	0.0351646	0.141656	0	0.270679
SNRPB	ENSG00000125835	63.3401	1.42319	0.509133	0.029356	0.805154	1	204.053	127.582	190.202	171.384	102.069	121.531
AC068946.1	ENSG00000280537	0.0289066	5.68161	2.5063	0.0295008	0.807011	1	0.0683922	0.00956217	0.154956	0	0.0404944	0
ZBTB37	ENSG00000185278	2.52392	-1.33534	-0.417208	0.029633	0.809265	1	5.90113	5.45293	3.86962	7.06867	6.77678	7.84997
AP003465.1	ENSG00000254224	0.0414362	-8.15807	-3.02823	0.0296852	0.809265	1	0.0341741	0	0	0.0660514	0.0910536	0.199282
AC016027.1	ENSG00000225335	0.0776964	-2.91385	-1.54293	0.0297065	0.809265	1	0.142293	0	0.075857	0.206266	0.294875	0.161343
AL033529.1	ENSG00000254553	0.0252378	-4.52127	-2.17673	0.0297737	0.809976	1	0.0461305	0	0	0.178321	0	0.0448341
CHL1-AS2	ENSG00000224318	0.0492786	-4.3986	-2.13704	0.0298227	0.810191	1	0.0274064	0.0574769	0	0.0264854	0.292087	0.0932267
PITHD1	ENSG00000057757	11.2814	1.33994	0.42217	0.0299652	0.810468	1	32.7342	29.6086	29.8627	28.829	24.6964	20.9092
GPX5	ENSG00000224586	0.120101	2.77481	1.47239	0.0298988	0.810468	1	0.211804	0.466407	0.275228	0.204687	0.0705415	0.102926
AL136038.3	ENSG00000261242	0.30644	-3.00103	-1.58546	0.0299975	0.810468	1	0.580336	0.0405694	0.232035	0.373889	1.46035	0.752036
CADM4	ENSG00000105767	0.272175	1.91413	0.936685	0.0299239	0.810468	1	1.1977	0.472813	0.6385	0.499292	0.479716	0.273892
PLCH1	ENSG00000114805	0.0165488	2.56023	1.35627	0.0300832	0.810559	1	0.0738937	0.0371929	0.0295449	0.0285642	0.00656276	0.0215451
TSPAN13	ENSG00000106537	27.7769	1.41069	0.496399	0.030048	0.810559	1	90.165	57.3108	81.5131	84.8091	47.3566	43.4685
AC035140.1	ENSG00000249085	0.412214	-3.10702	-1.63553	0.0302135	0.81185	1	0.752592	0.0901909	0.257922	0.831202	1.43229	1.2539
HSFX1	ENSG00000171116	0.0516387	48.8869	5.61138	0.0301726	0.81185	1	0.270015	0.0906044	0.086368	0	0	0
RTL5	ENSG00000242732	0.942613	-1.69332	-0.759858	0.0303032	0.813149	1	2.79494	1.06997	0.860296	2.13294	2.21632	3.76199
Z98745.1	ENSG00000286819	0.701954	-2.31687	-1.21218	0.0304068	0.813712	1	1.17961	0.75866	0.53453	1.78596	2.20008	2.02542
CLIP2	ENSG00000106665	0.0754016	-2.29211	-1.19668	0.0303882	0.813712	1	0.108689	0.133727	0.0231771	0.203071	0.225238	0.218311
DBR1	ENSG00000138231	5.25899	1.41471	0.500511	0.0305172	0.815559	1	14.6282	12.4404	15.7803	12.5785	11.008	9.30394
P4HA2	ENSG00000072682	0.792992	1.403	0.488514	0.030706	0.818088	1	2.76803	1.95073	1.85952	1.87371	1.46174	1.66019
PRMT5-AS1	ENSG00000237054	0.272556	-2.07367	-1.05218	0.0306864	0.818088	1	0.414871	0.264502	0.371566	0.40093	1.09065	0.822554
EML1	ENSG00000066629	3.91981	1.35411	0.437349	0.0307364	0.818088	1	11.4906	9.34567	11.2236	10.0095	8.1136	7.4951
LINC00607	ENSG00000235770	0.0141159	-3.94318	-1.97936	0.0309613	0.818299	1	0.0076177	0.0127807	0.00609156	0.0368086	0.06089	0.0222109
AC069222.1	ENSG00000273374	0.348428	-1.88201	-0.912272	0.0310096	0.818299	1	0.47325	0.621968	0.378438	0.899448	0.784579	1.31852
AC083798.2	ENSG00000272758	1.21105	-1.65694	-0.728525	0.0310326	0.818299	1	2.32602	2.08954	1.47923	2.70805	3.69245	3.96949
LMBRD2	ENSG00000164187	4.03034	-1.36787	-0.451934	0.031028	0.818299	1	7.88206	7.60766	8.0487	11.6404	8.98996	14.1307
HEIH	ENSG00000278970	2.6485	-1.67141	-0.741065	0.0310352	0.818299	1	3.7259	5.44458	3.38312	6.4348	7.17329	9.13476
TSPAN9	ENSG00000011105	26.1258	1.38368	0.468507	0.0309385	0.818299	1	88.1148	65.946	62.0277	64.1676	53.7081	49.142
HELLPAR	ENSG00000281344	0.100045	-1.47611	-0.561796	0.030978	0.818299	1	0.257248	0.150735	0.149063	0.246855	0.252581	0.360831
AC114490.2	ENSG00000271741	1.40234	1.64361	0.71687	0.0317162	0.819878	1	3.55754	3.84523	3.95266	2.29751	3.73681	1.47944
PRDX1	ENSG00000117450	197.072	1.61419	0.690808	0.0314703	0.819878	1	713.439	401.596	524.938	499.933	302.324	284.802
GORAB-AS1	ENSG00000231407	0.141919	-2.13759	-1.09598	0.0317195	0.819878	1	0.122021	0.25984	0.135104	0.290266	0.483502	0.437877
COA6-AS1	ENSG00000231663	1.29023	-2.10894	-1.07652	0.0316156	0.819878	1	1.29053	1.85589	1.62169	2.49433	5.15775	3.31484
AC021205.3	ENSG00000273007	0.214519	-2.51728	-1.33187	0.0314788	0.819878	1	0.297671	0.0936415	0.282667	0.269688	1.25577	0.271224
AC012640.2	ENSG00000259802	2.70121	-1.79671	-0.84536	0.0314402	0.819878	1	3.47085	4.83627	3.48113	5.74196	10.5539	6.68944
NIPBL-DT	ENSG00000285967	5.52944	-1.45329	-0.539323	0.0316498	0.819878	1	15.048	10.5345	5.96165	14.1363	11.5804	21.9822
CARMN	ENSG00000249669	0.329647	-1.86922	-0.902435	0.0313763	0.819878	1	0.618242	0.417376	0.416694	0.642988	0.651055	1.54795
NDUFA4	ENSG00000189043	34.6829	1.3518	0.434883	0.0315974	0.819878	1	123.773	70.8394	93.6367	96.1853	63.3965	68.036
MGAM2	ENSG00000257743	0.0249556	-2.85394	-1.51295	0.0316312	0.819878	1	0.012988	0.0381339	0.0155789	0.100412	0.0346053	0.0820495
MRPL23	ENSG00000214026	9.16118	1.37265	0.456964	0.0316869	0.819878	1	30.2345	20.8197	24.5762	24.983	17.4849	16.7444
MCRS1	ENSG00000187778	9.51606	1.3661	0.450062	0.0315826	0.819878	1	31.7114	21.4889	25.4233	25.8392	15.6627	20.2045
RNU1-27P	ENSG00000206596	79.0149	-1.55401	-0.635996	0.0313234	0.819878	1	104.715	151.286	139.044	228.941	270.106	176.845
AC008764.4	ENSG00000268790	0.745386	2.54821	1.34949	0.0317132	0.819878	1	0.402902	2.06548	3.25764	1.94681	0.43735	0.261053
MAGED1	ENSG00000179222	11.3711	1.34805	0.430869	0.0313956	0.819878	1	40.7486	22.2616	31.5281	32.2527	19.3432	23.2568
AP001486.2	ENSG00000260966	0.0229497	55.8006	5.80221	0.0318115	0.821178	1	0	0.173926	0	0	0	0
MRPL4	ENSG00000105364	10.1984	1.33432	0.4161	0.0318646	0.821472	1	29.1652	24.9566	29.1398	27.2812	20.5952	19.8103
AF241728.2	ENSG00000287729	0.866347	-2.37214	-1.24619	0.0319343	0.822192	1	1.17016	1.23612	0.589163	1.75908	1.19323	4.54911
TFAP2A-AS2	ENSG00000285278	0.0522155	-2.72439	-1.44593	0.0321148	0.824685	1	0.0463997	0.0518986	0.049472	0.104628	0.260992	0.0751597
NR2F2	ENSG00000185551	18.7333	1.34299	0.425445	0.0320887	0.824685	1	57.9393	42.0129	53.8911	46.7143	43.7891	33.0039
AL109936.2	ENSG00000271420	1.10876	-1.90012	-0.926092	0.0323265	0.825114	1	1.87553	0.684063	2.08665	3.625	2.53479	3.40788
SLC44A5	ENSG00000137968	0.0120457	-34.0844	-5.09104	0.0324243	0.825114	1	0	0	0	0.0487914	0.00747336	0.0490692
RBKS	ENSG00000171174	0.0887254	-2.51028	-1.32785	0.0324035	0.825114	1	0.0840532	0.0846129	0.107542	0.0974745	0.283673	0.375779
AL080250.1	ENSG00000225793	0.386322	-1.88616	-0.915452	0.0325504	0.825114	1	0.347677	0.700926	0.53811	0.579861	1.50906	1.19357
PMPCA	ENSG00000165688	8.50224	1.36012	0.443737	0.032464	0.825114	1	30.7259	19.9369	20.084	26.0161	17.143	12.5645
CEP57	ENSG00000166037	5.46273	-1.35971	-0.443297	0.0324893	0.825114	1	10.4948	10.1564	11.3886	12.7029	14.611	19.5945
AC026992.2	ENSG00000261634	0.0465994	-3.16923	-1.66413	0.0323457	0.825114	1	0.109242	0.0183282	0	0.17947	0.116426	0.106172
SEMA4B	ENSG00000185033	1.90495	1.45701	0.543008	0.0325272	0.825114	1	6.13563	4.68377	4.87616	3.85304	4.99237	2.69852
AC002094.2	ENSG00000265618	0.137255	2.93074	1.55127	0.0323441	0.825114	1	0.283697	0.436311	0.378101	0.274163	0.083987	0.045954
RNF157	ENSG00000141576	2.99655	1.32061	0.401207	0.0323578	0.825114	1	10.8781	7.59143	6.47587	7.61254	5.81221	6.62077
EVC	ENSG00000072840	5.39298	1.3249	0.405882	0.0326959	0.827735	1	17.8658	14.3276	12.3465	14.3544	11.6105	10.0736
CAP1	ENSG00000131236	19.978	1.38637	0.471316	0.0327695	0.828535	1	71.9876	42.0975	52.0979	53.9357	34.2384	39.6016
CAPN6	ENSG00000077274	0.0933671	-3.46406	-1.79246	0.0328728	0.830079	1	0.135061	0.0377668	0.0480012	0.667115	0.0533122	0.102095
RNU2-63P	ENSG00000222724	8.44435	-2.26522	-1.17965	0.032917	0.830132	1	10.109	10.0846	9.17616	7.65702	42.9496	20.4464
IGFBP2	ENSG00000115457	15.207	1.37742	0.461973	0.0329978	0.831105	1	53.6076	32.9308	39.7126	45.0657	26.5354	26.6372
AC019080.1	ENSG00000213963	0.330508	-1.73243	-0.792801	0.0331203	0.833127	1	0.450878	0.601453	0.461029	0.721448	0.859962	1.25715
KCNT2	ENSG00000162687	3.21031	-1.58753	-0.666782	0.0333882	0.834291	1	6.39034	4.7658	5.22949	6.11067	8.99061	12.4143
ID2	ENSG00000115738	3.97598	-1.84778	-0.885794	0.0332469	0.834291	1	9.74813	5.18379	2.93038	4.81444	17.2941	11.5459
ZNF804A	ENSG00000170396	0.489399	2.18073	1.12481	0.0334632	0.834291	1	0.736979	1.3248	1.79606	0.350454	1.04934	0.557097
CACNA2D2	ENSG00000007402	0.0411141	-2.57868	-1.36663	0.0333523	0.834291	1	0.0335362	0.0421994	0.0469307	0.0891255	0.193601	0.0651875
ATP5ME	ENSG00000169020	70.1855	1.34963	0.432561	0.0334529	0.834291	1	249.096	150.758	183.184	195.988	152.084	114.083
RAB30-DT	ENSG00000246067	1.58667	-1.42809	-0.514086	0.03332	0.834291	1	3.62597	3.17777	2.16287	3.53261	5.19707	4.83485
TMEM202-AS1	ENSG00000261423	0.93836	-1.84914	-0.886852	0.0334219	0.834291	1	2.52028	1.01613	0.734279	2.30342	2.70684	3.03808
GNG5	ENSG00000174021	52.5665	1.3624	0.446146	0.0339032	0.835322	1	187.957	105.681	143.313	133.415	89.3501	118.328
AL591806.4	ENSG00000270149	0.538767	1.86392	0.898342	0.0347307	0.835322	1	1.67988	1.30406	1.44358	1.3569	0.823919	0.389892
ETNK2	ENSG00000143845	0.436155	1.70817	0.772455	0.0353856	0.835322	1	1.96137	0.610852	1.13641	1.12366	0.469391	0.684881
PTPN14	ENSG00000152104	2.15271	1.31527	0.395357	0.0356386	0.835322	1	7.93138	5.22131	4.79183	4.88136	5.13122	4.42015
AC008074.2	ENSG00000260101	0.337147	-2.43279	-1.28261	0.0354229	0.835322	1	0.555889	0.326428	0.244487	0.349186	1.62922	0.864427
AC110769.2	ENSG00000270019	1.62006	-1.72089	-0.783155	0.0344832	0.835322	1	3.62947	1.60852	2.43687	3.5406	5.50421	4.79204
NXPH2	ENSG00000144227	0.0653993	3.03733	1.6028	0.0337871	0.835322	1	0.176093	0.246202	0.109522	0.0945419	0.0695086	0.019016
UQCRC1	ENSG00000010256	11.5034	1.35436	0.437607	0.0346422	0.835322	1	36.1466	24.7717	33.6673	30.6793	17.9248	26.529
ATP1B3	ENSG00000069849	27.8441	1.34358	0.426078	0.0346472	0.835322	1	92.7215	65.3964	71.9267	75.8654	53.7843	54.0341
NSUN7	ENSG00000179299	1.52588	-1.58037	-0.660259	0.0358371	0.835322	1	2.46196	2.50247	2.73035	3.19546	4.14168	5.75488
AC098818.2	ENSG00000260278	0.427316	-2.22801	-1.15575	0.0346475	0.835322	1	0.59401	0.498305	0.438467	0.574049	1.86676	1.17684
SPEF2	ENSG00000152582	0.0854556	-2.1515	-1.10534	0.0355358	0.835322	1	0.0853844	0.159784	0.0682784	0.123773	0.282915	0.322364
JAKMIP2	ENSG00000176049	0.381555	-1.94886	-0.962629	0.0339315	0.835322	1	0.49531	0.618429	0.414502	1.15214	1.56524	0.531769
NHP2	ENSG00000145912	42.4335	1.33124	0.41277	0.0345283	0.835322	1	126.753	102.827	117.977	113.233	78.0318	90.7473
FOXQ1	ENSG00000164379	0.411154	2.07824	1.05536	0.0339661	0.835322	1	1.97196	0.434448	1.11498	0.635232	0.513028	0.600131
MSH5	ENSG00000204410	4.34326	-1.34977	-0.432717	0.0342465	0.835322	1	10.1691	8.82067	7.00575	11.6282	11.031	14.702
PIM1	ENSG00000137193	4.80153	-1.65775	-0.729229	0.0357377	0.835322	1	6.08759	9.11294	7.94546	8.06379	8.70028	24.6521
SGK1	ENSG00000118515	2.2949	-1.47162	-0.557401	0.0350181	0.835322	1	3.5435	5.33551	3.38928	3.66536	8.80531	7.04251
MAP7	ENSG00000135525	0.489971	1.62068	0.696598	0.0348436	0.835322	1	1.63478	0.85712	1.55627	0.930982	0.717312	1.0214
ANKRD61	ENSG00000157999	0.207851	2.45883	1.29797	0.0339439	0.835322	1	0.595969	0.624935	0.476572	0.107989	0.463138	0.144805
KMT2E-AS1	ENSG00000239569	2.45027	-1.84788	-0.885872	0.0358138	0.835322	1	4.60904	2.05405	4.08878	4.45416	7.67522	8.81905
SOX7	ENSG00000171056	8.69781	1.39504	0.48031	0.0351303	0.835322	1	26.9389	18.0622	26.433	22.8949	18.0978	14.3567
AC009879.2	ENSG00000285655	1.28939	-4.03639	-2.01307	0.0341367	0.835322	1	0.475799	1.59656	0.304381	3.67848	7.18375	0
UBR5-AS1	ENSG00000246263	1.58249	-1.68617	-0.753752	0.0350243	0.835322	1	2.29712	2.24105	2.95267	4.4563	2.64465	6.59848
STX17-AS1	ENSG00000255145	0.161335	-1.91135	-0.934591	0.034916	0.835322	1	0.188818	0.263994	0.20851	0.278054	0.646828	0.445672
CDC26	ENSG00000176386	6.33073	1.54115	0.624003	0.0356204	0.835322	1	22.1226	16.248	14.1524	16.9725	12.1897	7.41562
AL157888.1	ENSG00000282787	0.343212	-2.85037	-1.51115	0.0353418	0.835322	1	0.357531	0.44989	0.142951	0.518275	1.19076	1.21619
FADS2	ENSG00000134824	4.81948	1.65371	0.725705	0.0351185	0.835322	1	22.401	6.38753	12.3424	12.0424	3.44819	10.3683
RAB3IL1	ENSG00000167994	0.593576	-1.71997	-0.782386	0.0343053	0.835322	1	1.16273	1.14261	0.49146	1.31629	1.87355	1.88881
AHNAK	ENSG00000124942	17.3215	-1.38599	-0.470918	0.0343824	0.835322	1	37.7394	38.2785	24.4652	49.9255	44.6105	54.4995
SIAE	ENSG00000110013	0.651938	-1.54983	-0.632112	0.034031	0.835322	1	1.135	1.36491	0.839413	1.78161	2.08017	1.72161
ABCC9	ENSG00000069431	4.34029	-1.36341	-0.447215	0.0353033	0.835322	1	8.56478	6.72933	9.96502	13.8817	11.3675	12.1114
CLIP1	ENSG00000130779	3.83515	-1.37943	-0.464074	0.0355965	0.835322	1	8.53079	7.49174	6.4723	8.5974	9.66656	14.6974
RTN1	ENSG00000139970	0.0173115	-3.3916	-1.76197	0.034969	0.835322	1	0.0176122	0.0147746	0.00704188	0.102122	0.0234631	0.0256759
GOLGA8A	ENSG00000175265	24.1443	-1.38314	-0.467944	0.0350134	0.835322	1	60.9585	45.6893	35.0132	54.4631	78.6183	73.3718
CCPG1	ENSG00000260916	2.83532	-1.5891	-0.668214	0.0342855	0.835322	1	2.7316	6.40404	4.52301	5.66423	12.0498	6.347
CIB1	ENSG00000185043	3.76498	1.66374	0.734429	0.0336299	0.835322	1	14.7273	7.09855	9.73245	9.88267	3.58177	6.68428
AC138904.1	ENSG00000246465	0.543182	-1.83878	-0.878747	0.0351075	0.835322	1	1.04683	0.914014	0.461265	1.23876	1.11947	2.32552
AC010547.1	ENSG00000247324	0.0832897	-2.45598	-1.2963	0.0356394	0.835322	1	0.151819	0.0477595	0.0758774	0.238416	0.202254	0.276662
ACTG1	ENSG00000184009	509.249	-1.3683	-0.452388	0.0350716	0.835322	1	997.528	1047.28	936.725	1188.69	1257.89	1932.66
CCDC137	ENSG00000185298	7.6129	1.3509	0.433923	0.0343947	0.835322	1	26.7793	17.2347	19.1789	20.3262	15.2318	14.3826
ARHGDIA	ENSG00000141522	51.0812	1.34878	0.431654	0.0353997	0.835322	1	158.772	144.992	115.951	138.15	119.529	78.4274
AC145207.5	ENSG00000263731	6.99572	1.44912	0.535178	0.0357753	0.835322	1	29.4269	13.7438	15.8984	18.9842	10.619	13.2724
AC010422.2	ENSG00000268945	0.124855	4.27668	2.09649	0.0337656	0.835322	1	0.333883	0.280089	0.400489	0.0806659	0.0741334	0.0811251
AL353194.1	ENSG00000229539	0.775035	-2.33109	-1.221	0.0341759	0.835322	1	1.44229	0.504128	0.768891	2.20688	2.66863	1.75219
AL109923.1	ENSG00000277558	0.31791	-2.60433	-1.38091	0.0357592	0.835322	1	0.272748	0.533874	0.145403	0.878608	1.13044	0.706888
FP671120.4	ENSG00000278996	0.426466	-2.07035	-1.04987	0.0347137	0.835322	1	0.89118	0.320398	0.475093	1.92752	0.998783	0.763024
AP001469.2	ENSG00000228137	1.11996	-2.33937	-1.22612	0.0348599	0.835322	1	1.22317	1.36813	1.19548	2.75815	2.6555	4.22683
Z99774.1	ENSG00000206028	0.0308665	-5.91765	-2.56502	0.0353494	0.835322	1	0.0202847	0	0.0162209	0	0.216187	0.0394293
CASTOR1	ENSG00000239282	0.141663	-2.89378	-1.53295	0.0348257	0.835322	1	0.0579068	0	0.308704	0.67153	0.205716	0.356436
WDR45	ENSG00000196998	3.03163	-1.41105	-0.496773	0.0356688	0.835322	1	5.66084	6.87198	4.53577	7.4907	9.41294	9.05978
ZC3H12B	ENSG00000102053	0.0114558	3.75931	1.91047	0.0348054	0.835322	1	0.0609319	0.0113588	0.0270693	0.0065427	0.0180386	0
PGK1	ENSG00000102144	33.2788	1.48361	0.569117	0.0335553	0.835322	1	121.752	66.7248	88.7226	90.7917	48.4514	60.146
AC004835.1	ENSG00000230392	0.551349	-2.34638	-1.23044	0.0343003	0.835322	1	0.328198	1.23894	0.262446	0.599097	1.7651	2.33915
RAB39B	ENSG00000155961	0.597134	-1.99258	-0.994638	0.0346081	0.835322	1	0.621201	0.990118	0.732705	1.23067	2.05512	1.81123
NFASC	ENSG00000163531	15.173	-1.79467	-0.843715	0.0359396	0.836334	1	24.9284	21.5224	22.8335	20.3268	25.424	85.1462
HMGCS1	ENSG00000112972	8.10954	1.56975	0.650536	0.0359654	0.836334	1	31.3689	19.3033	17.2367	22.5776	10.0017	13.4325
AC008764.8	ENSG00000279529	0.365024	-1.90739	-0.9316	0.0360649	0.837659	1	0.760823	0.54005	0.265199	0.90493	1.24747	0.966962
TMEM53	ENSG00000126106	0.404788	1.81884	0.863019	0.0367727	0.837674	1	1.23542	0.811617	1.27358	1.17952	0.409805	0.405056
CASQ2	ENSG00000118729	0.123371	-2.52067	-1.33381	0.0363638	0.837674	1	0.0957096	0.0642313	0.214298	0.55496	0.289011	0.223248
AL451050.2	ENSG00000272205	1.04453	-2.17175	-1.11886	0.0364987	0.837674	1	2.02068	0.977949	0.932224	1.50214	4.76269	2.56817
AC098934.4	ENSG00000260021	0.233478	-6.91577	-2.78989	0.0367669	0.837674	1	0	0.150217	0.0715965	0.086525	1.59036	0.261053
WNT9A	ENSG00000143816	0.0767822	-2.18164	-1.12542	0.0362177	0.837674	1	0.11911	0.0666129	0.0952474	0.153477	0.282096	0.218663
PCNX2	ENSG00000135749	1.90342	-1.53874	-0.621751	0.0367886	0.837674	1	3.13953	4.17725	2.45537	3.87496	7.15296	5.18237
SH3YL1	ENSG00000035115	1.66114	-1.37749	-0.462045	0.0366071	0.837674	1	3.87102	3.56288	2.26546	4.16887	5.45935	4.58132
LRRTM2	ENSG00000146006	0.106233	-1.77425	-0.827212	0.0366431	0.837674	1	0.156482	0.189612	0.125132	0.235237	0.463258	0.202779
PNRC1	ENSG00000146278	23.9273	-1.3271	-0.408282	0.036495	0.837674	1	49.1775	46.4852	47.3149	74.1293	69.9355	61.4144
SKIDA1	ENSG00000180592	13.8073	1.39954	0.484951	0.0365103	0.837674	1	40.178	23.4825	49.189	30.6817	30.929	25.592
AC023024.1	ENSG00000259172	0.270915	-1.97097	-0.978908	0.0365672	0.837674	1	0.511621	0.291849	0.310933	0.83064	0.8179	0.676251
CX3CL1	ENSG00000006210	0.111902	-2.10679	-1.07505	0.0366921	0.837674	1	0.0978261	0.164129	0.149343	0.189078	0.450211	0.311161
ENO3	ENSG00000108515	6.82256	-1.4308	-0.516825	0.0363466	0.837674	1	9.94133	13.1362	14.418	21.864	14.1049	22.9847
EIF5A	ENSG00000132507	81.003	1.44515	0.531217	0.0365126	0.837674	1	287.761	171.15	214.041	212.484	136.753	148.135
RAC3	ENSG00000169750	10.5226	1.34515	0.427766	0.0361581	0.837674	1	34.0406	23.9979	28.6884	28.3064	18.6317	22.3474
AC006262.1	ENSG00000268460	0.025098	-3.6556	-1.87011	0.0365677	0.837674	1	0	0.0311679	0.0178263	0.0287244	0.138591	0.0433319
MT-TK	ENSG00000210156	4.84423	-3.47936	-1.79882	0.0364068	0.837674	1	2.2716	3.81121	4.23851	4.39053	33.6248	2.20776
AC103810.2	ENSG00000265218	0.0725683	-3.9286	-1.97401	0.0368799	0.837816	1	0.0390597	0.0982994	0	0.26423	0.208142	0.151848
MCM5	ENSG00000100297	9.10758	1.35767	0.441129	0.0368679	0.837816	1	30.9141	20.8923	23.5602	28.2684	14.923	16.5288
AC012065.4	ENSG00000270100	0.599776	-2.31693	-1.21221	0.0370083	0.839765	1	1.40511	0.458393	0.312114	1.73509	1.38659	2.04844
RASSF1-AS1	ENSG00000281358	0.213218	-2.81976	-1.49557	0.0373635	0.842968	1	0.335468	0.0562837	0.214608	0.518712	0.655471	0.652081
ZYX	ENSG00000159840	11.8134	-1.48167	-0.567221	0.0373257	0.842968	1	25.8125	17.1623	22.3407	25.3214	20.3025	56.4499
TAS2R31	ENSG00000256436	0.691683	-2.03515	-1.02514	0.0372744	0.842968	1	1.24593	0.870991	0.664213	1.65559	1.29098	3.02729
COX6A1	ENSG00000111775	111.252	1.34096	0.423261	0.0372309	0.842968	1	302.863	304.176	298.12	270.689	257.417	205.173
FLNA	ENSG00000196924	26.4442	-1.41149	-0.497219	0.037342	0.842968	1	63.8902	44.3255	45.0439	52.2633	65.024	109.945
HIST3H2BB	ENSG00000196890	10.5688	-1.49139	-0.576658	0.0374667	0.843464	1	31.7262	12.8841	14.6304	21.1262	29.9096	39.5511
PTX3	ENSG00000163661	0.0454529	4.60504	2.20321	0.0375319	0.843464	1	0	0.141605	0.202477	0.0271883	0.0499732	0
AL603756.1	ENSG00000271933	0.227248	-2.31304	-1.20979	0.0375996	0.843464	1	0.269553	0.24668	0.254742	0.260495	1.17524	0.476324
SDR42E2	ENSG00000183921	0.0725683	-2.68471	-1.42477	0.037512	0.843464	1	0.120922	0.067626	0.032232	0.175287	0.304285	0.137111
CACNG2	ENSG00000166862	0.0319184	3.47106	1.79538	0.0375905	0.843464	1	0.0986426	0.124124	0.0394402	0.0635519	0.0146013	0
GSR	ENSG00000104687	19.1305	1.32653	0.407657	0.0376446	0.843513	1	66.6744	41.9582	50.0337	56.001	37.8349	34.3239
COX7B	ENSG00000131174	10.4484	1.38703	0.472003	0.0377559	0.845046	1	37.1291	20.7254	28.948	27.1947	16.6823	22.8026
AMY2B	ENSG00000240038	0.0333976	-2.24159	-1.16452	0.0381249	0.845418	1	0.0495298	0.017807	0.0509232	0.0478654	0.113115	0.123783
KCNH1	ENSG00000143473	0.0219067	-2.14676	-1.10216	0.0379195	0.845418	1	0.0595125	0.0136156	0.012979	0.0313705	0.0912952	0.0630982
DNAH6	ENSG00000115423	0.0511698	-1.97329	-0.9806	0.0382055	0.845418	1	0.0823652	0.0723849	0.0533185	0.0985492	0.170687	0.167725
APBB3	ENSG00000113108	1.02467	-1.58791	-0.66713	0.038225	0.845418	1	2.15781	1.56718	1.44758	2.43518	4.14155	2.1394
PRELID1	ENSG00000169230	34.769	1.34844	0.431292	0.0378247	0.845418	1	115.341	82.8869	88.9396	98.242	65.265	65.3169
GRM1	ENSG00000152822	0.0366161	-2.64928	-1.4056	0.038257	0.845418	1	0.0286199	0.0660239	0.0114431	0.0484017	0.203346	0.0556311
LHX2	ENSG00000106689	0.0674141	2.45323	1.29468	0.0381377	0.845418	1	0.318406	0.071228	0.186719	0.16411	0	0.0825221
AL135791.1	ENSG00000236514	0.670316	-2.65945	-1.41113	0.0382979	0.845418	1	0.770034	0.484476	0.718392	1.67435	3.2485	0.748394
POC1B-AS1	ENSG00000270344	0.286596	-1.92104	-0.941891	0.0381563	0.845418	1	0.688701	0.234366	0.337709	0.583933	0.502023	1.38921
AC127002.2	ENSG00000275265	0.358626	-4.47356	-2.16142	0.0380903	0.845418	1	0.232985	0.29317	0.0931541	0	1.44845	1.58506
CCDC33	ENSG00000140481	0.0306702	-2.42584	-1.27848	0.0380489	0.845418	1	0.0226191	0.0442744	0.0301459	0.0947222	0.0535701	0.117245
LINC00662	ENSG00000261824	2.40315	-1.34936	-0.432277	0.0383305	0.845418	1	6.06549	4.5699	3.89022	5.31083	6.19807	9.13505
AC008969.1	ENSG00000176593	0.791956	-1.73889	-0.798169	0.0380824	0.845418	1	1.54874	1.3283	0.817942	1.51345	2.64834	2.60043
H6PD	ENSG00000049239	1.60631	-1.3316	-0.413163	0.0386527	0.846032	1	3.60525	3.12456	2.93754	5.44596	3.67164	4.74744
EFHD2	ENSG00000142634	8.85818	1.41531	0.501116	0.0396018	0.846032	1	31.0619	17.3189	25.1233	23.9134	10.9048	20.6139
RAP1GAP	ENSG00000076864	0.110463	2.02361	1.01693	0.0432617	0.846032	1	0.460504	0.154523	0.316691	0.222514	0.163596	0.0984637
SH3BGRL3	ENSG00000142669	11.9997	1.42724	0.513231	0.0391189	0.846032	1	38.4218	31.47	28.9341	30.1724	22.5701	21.6996
THEMIS2	ENSG00000130775	0.0537537	2.75671	1.46295	0.0410153	0.846032	1	0.275286	0.115466	0.0733782	0.0997631	0.0713099	0
NDUFS5	ENSG00000168653	62.0114	1.46199	0.547938	0.0428156	0.846032	1	232.231	115.704	169.695	171.896	94.4071	110.925
AL603832.2	ENSG00000261595	0.152989	-3.06192	-1.61444	0.0411521	0.846032	1	0.124715	0.104621	0.159567	0.168734	0.642431	0.484842
RNVU1-4	ENSG00000277610	10.8343	-2.05421	-1.03858	0.0387389	0.846032	1	13.251	14.9117	13.1807	11.244	54.5378	25.4431
TUFT1	ENSG00000143367	6.68004	-1.6223	-0.698041	0.0395732	0.846032	1	7.73601	14.5385	10.1755	9.97247	18.6818	28.5468
LMNA	ENSG00000160789	2.62552	-1.50609	-0.59081	0.0402465	0.846032	1	4.53778	3.10644	6.2986	9.08591	3.61906	10.1038
CCDC181	ENSG00000117477	7.25644	-1.94225	-0.957729	0.039855	0.846032	1	10.2903	10.3611	9.21322	11.4446	24.8625	25.5686
ERVMER61-1	ENSG00000230426	0.144089	-2.25233	-1.17142	0.0416806	0.846032	1	0.0482333	0.217024	0.217395	0.224587	0.552995	0.44747
PHLDA3	ENSG00000174307	5.54818	-1.47523	-0.560943	0.0402185	0.846032	1	11.9149	8.96686	9.30564	10.0455	21.135	16.0278
BTG2	ENSG00000159388	21.2823	-1.36975	-0.453911	0.0437248	0.846032	1	41.7764	43.1416	38.6186	43.3638	72.8403	65.4721
PLEKHA6	ENSG00000143850	0.128725	-2.12601	-1.08815	0.0430334	0.846032	1	0.14272	0.179588	0.149243	0.482734	0.42414	0.197394
AC092803.1	ENSG00000260805	0.444448	-2.06387	-1.04535	0.0410132	0.846032	1	0.614053	1.00682	0.111598	1.025	1.16509	1.62763
AC092803.4	ENSG00000288007	0.0367091	-7.42629	-2.89264	0.0414323	0.846032	1	0	0	0.0269797	0.130421	0.149824	0.0327909
TFB2M	ENSG00000162851	21.0568	1.30738	0.386683	0.042491	0.846032	1	66.1658	49.1747	57.8043	55.3861	43.6708	43.4292
TP53I3	ENSG00000115129	1.49402	-1.46023	-0.546198	0.0417178	0.846032	1	3.14081	2.94248	2.12659	4.29811	4.29618	4.23345
AC010733.2	ENSG00000267520	0.200108	-6.25884	-2.6459	0.0410444	0.846032	1	0.223096	0.0545859	0	0.853414	0.487094	0.388481
ANKRD36C	ENSG00000174501	4.51455	-1.34444	-0.42701	0.0398241	0.846032	1	13.4272	7.50403	6.70826	10.7775	13.3087	14.612
LYPD6	ENSG00000187123	4.62743	1.35291	0.43607	0.0436159	0.846032	1	14.5806	10.6846	12.7931	11.9791	7.44979	10.8043
ATP5MC3	ENSG00000154518	19.7532	1.36977	0.453932	0.0401377	0.846032	1	69.1397	40.785	53.9629	54.7661	38.0972	35.2167
PTPRN	ENSG00000054356	0.0210154	3.35317	1.74553	0.0427903	0.846032	1	0.154606	0.010808	0.0257566	0.0373526	0.0114426	0.00626087
RHBDD1	ENSG00000144468	8.3276	-1.43008	-0.516091	0.0429309	0.846032	1	11.5482	21.1984	12.3251	18.9405	34.5618	17.2632
RRP9	ENSG00000114767	20.7857	1.32949	0.410878	0.0415117	0.846032	1	66.3409	52.0478	52.7477	54.2789	49.578	34.6436
ERC2	ENSG00000187672	0.262597	-1.60276	-0.68056	0.0422846	0.846032	1	0.395847	0.536846	0.364024	0.433551	0.919932	0.884863
GUCA1C	ENSG00000138472	11.7191	1.57455	0.65494	0.0395431	0.846032	1	40.1628	25.2116	31.6796	32.5203	17.5924	16.2863
NECTIN3-AS1	ENSG00000242242	0.171525	-2.08745	-1.06174	0.0394411	0.846032	1	0.325278	0.163722	0.182078	0.29863	0.505558	0.663887
MYLK	ENSG00000065534	0.55441	1.46165	0.547601	0.0409828	0.846032	1	1.86986	1.35998	1.35567	1.56901	0.872816	0.931894
EIF4G1	ENSG00000114867	48.1654	1.33177	0.41334	0.0393583	0.846032	1	167.826	125.794	105.888	133.836	106.447	80.7311
NSG1	ENSG00000168824	0.0172353	-3.90292	-1.96455	0.0410651	0.846032	1	0.0121708	0.0102099	0.00973251	0.0470474	0.0756654	0.0236576
PARM1	ENSG00000169116	0.159886	-1.9325	-0.950472	0.040898	0.846032	1	0.252701	0.185488	0.218914	0.529119	0.514324	0.327466
CFAP299	ENSG00000197826	0.0363219	-3.37046	-1.75294	0.0400089	0.846032	1	0.0236731	0.0397178	0.0189304	0.194459	0.0315373	0.0920311
AC097460.1	ENSG00000245322	0.345991	-1.91211	-0.935168	0.0392064	0.846032	1	0.653698	0.502677	0.313641	0.431683	1.43208	1.06947
LINC02503	ENSG00000249614	0.101715	-2.69389	-1.42969	0.0411197	0.846032	1	0.148056	0.0621007	0.0887956	0.250391	0.230114	0.395711
AC099343.3	ENSG00000271646	0.556972	-1.98542	-0.989444	0.0384779	0.846032	1	0.656462	1.10139	0.45721	1.16648	1.84312	1.74939
AC093510.1	ENSG00000255647	1.86793	-2.05745	-1.04086	0.0415192	0.846032	1	2.99796	1.81076	2.49324	3.59255	5.96422	6.41017
TSLP	ENSG00000145777	0.442564	-1.92996	-0.948568	0.040801	0.846032	1	0.472473	0.813558	0.50707	0.781019	1.64535	1.34133
PCDHB12	ENSG00000120328	0.334159	-1.79062	-0.840456	0.0389996	0.846032	1	0.601852	0.562256	0.339081	0.727034	1.11764	1.01035
NOP16	ENSG00000048162	10.4562	1.33373	0.41547	0.0395384	0.846032	1	30.7801	25.0596	29.7081	27.3654	21.0043	21.0054
N4BP3	ENSG00000145911	0.58822	-1.62895	-0.703943	0.0422869	0.846032	1	0.66421	1.2184	0.941891	1.34369	1.59669	2.10878
RNF182	ENSG00000180537	0.0124724	6.84182	2.77438	0.0412772	0.846032	1	0.0258682	0.0325506	0.0413715	0	0	0.0125706
AL121932.2	ENSG00000287279	0.0400039	-3.24862	-1.69983	0.0392004	0.846032	1	0.0677454	0.0227322	0.0108346	0.0654688	0.168468	0.105346
HLA-B	ENSG00000234745	2.96587	-1.6334	-0.70788	0.0436795	0.846032	1	4.37791	5.61084	4.40383	6.29582	8.87183	10.232
SNRPC	ENSG00000124562	75.4248	1.36454	0.448417	0.0435442	0.846032	1	246.483	167.573	208.1	207.368	133.713	149.064
DINOL	ENSG00000285244	0.323235	-2.74479	-1.4567	0.043603	0.846032	1	0.390145	0.18702	0.356552	0.754069	1.13851	0.866699
EYS	ENSG00000188107	4.31424	-1.32555	-0.406596	0.0401465	0.846032	1	10.4667	7.67853	8.11651	11.6632	11.7997	13.6006
AL139274.2	ENSG00000272008	0.337367	-1.94525	-0.959952	0.040314	0.846032	1	0.43667	0.667985	0.267025	0.670228	1.25472	0.948654
MICAL1	ENSG00000135596	0.551471	-1.6642	-0.734832	0.0419173	0.846032	1	1.28617	0.760459	0.681532	1.60235	1.16981	1.98799
AC004540.2	ENSG00000225792	2.77419	-1.51978	-0.603865	0.0420138	0.846032	1	6.39282	4.33758	4.07462	7.32274	7.88197	8.60706
SFRP4	ENSG00000106483	0.0214998	-5.5664	-2.47674	0.0407121	0.846032	1	0	0.0126751	0.0120824	0.131415	0.0134192	0.0440545
MTERF1	ENSG00000127989	3.56256	1.36163	0.445331	0.041978	0.846032	1	10.1069	8.85266	10.1091	8.57919	8.5608	5.99521
RDH10	ENSG00000121039	2.64414	1.44739	0.533452	0.0424778	0.846032	1	10.4198	6.18043	5.58138	6.99498	5.28939	3.95224
LINC02235	ENSG00000254689	0.0170237	-5.21296	-2.3821	0.0401199	0.846032	1	0.0128153	0	0.0102478	0.0371539	0.0113817	0.0996411
TP53INP1	ENSG00000164938	2.75419	-1.34254	-0.42496	0.0387379	0.846032	1	6.8568	4.34949	5.37794	8.34198	7.03243	8.33469
PLEKHF2	ENSG00000175895	4.52955	1.37748	0.462028	0.04354	0.846032	1	9.82177	11.8871	14.6206	8.64801	12.257	8.02822
AP003548.1	ENSG00000253105	2.19416	-1.66416	-0.734793	0.0438136	0.846032	1	2.46063	4.59175	3.27275	4.24633	6.53382	8.00414
KCNS2	ENSG00000156486	0.0177756	3.26231	1.7059	0.0436302	0.846032	1	0.0978475	0.0492495	0.00782446	0.0283678	0.0173804	0
AL353151.2	ENSG00000287759	0.464337	-2.3411	-1.22718	0.0422497	0.846032	1	0.961139	0.403141	0.316475	0.71029	1.02937	2.2529
CR786580.1	ENSG00000225411	0.0831435	-2.68243	-1.42354	0.0437936	0.846032	1	0.0656803	0.15152	0.0262609	0.142815	0.204165	0.367048
SEC61B	ENSG00000106803	25.1497	1.41519	0.500994	0.0419863	0.846032	1	101.185	46.0823	64.121	74.0591	36.3671	47.7222
AL157829.1	ENSG00000285820	0.123906	-2.75798	-1.46361	0.0428242	0.846032	1	0.102176	0.042857	0.204266	0.222171	0.249553	0.59583
AL359636.2	ENSG00000234156	0.0636812	-2.81771	-1.49452	0.0405719	0.846032	1	0.0440965	0.0591868	0.0705243	0.127844	0.242815	0.171429
AL157935.2	ENSG00000257524	0.784601	1.74799	0.805696	0.0398126	0.846032	1	2.8065	1.52681	2.18869	2.14827	0.962471	0.90471
ZNF33B	ENSG00000196693	7.54378	-1.72155	-0.783707	0.0429222	0.846032	1	19.8837	10.7187	6.67735	18.821	7.28018	39.4744
FO681492.1	ENSG00000277758	0.0504746	-2.78525	-1.47781	0.0407741	0.846032	1	0.0479587	0.0402317	0.0536909	0.0834248	0.178894	0.167799
FGFBP3	ENSG00000174721	3.47648	-1.70498	-0.769754	0.0410901	0.846032	1	5.83397	6.35699	4.16712	8.34653	9.56983	11.9252
AL138921.2	ENSG00000236308	0.609298	-2.3807	-1.25138	0.0434751	0.846032	1	1.19213	0.692348	0.219992	1.77242	2.60621	0.802128
INSYN2A	ENSG00000188916	0.298765	1.57644	0.65667	0.0433556	0.846032	1	0.602318	1.09323	0.691823	0.35983	0.447404	0.840835
ZNF511-PRAP1	ENSG00000283496	0.0857182	3.71856	1.89475	0.0432279	0.846032	1	0.15231	0	0.527784	0.098128	0	0.0986867
AC009549.1	ENSG00000270607	0.244125	-2.49853	-1.32108	0.0402448	0.846032	1	0.282939	0.237353	0.251394	0.303813	1.08892	0.672193
TP53I11	ENSG00000175274	1.19564	-1.82585	-0.86857	0.0426627	0.846032	1	2.2082	0.847512	2.31401	3.44508	1.45486	5.48459
SELENOH	ENSG00000211450	14.8947	1.37228	0.45657	0.0410332	0.846032	1	41.9241	39.1114	40.4325	24.1533	35.4748	35.3504
EIF1AD	ENSG00000175376	9.89669	1.35155	0.434617	0.0433629	0.846032	1	30.5884	26.3951	24.2947	23.8947	26.1903	14.7405
AP002748.4	ENSG00000255517	1.04633	-1.69791	-0.763761	0.0406198	0.846032	1	1.72643	1.72928	1.46298	2.51507	2.83776	3.6313
PPP1CA	ENSG00000172531	20.0641	1.39532	0.4806	0.0395868	0.846032	1	63.0409	49.3114	52.6336	52.6333	34.4137	40.2827
NDUFV1	ENSG00000167792	16.9635	1.31145	0.391163	0.043427	0.846032	1	53.3079	40.5866	45.5952	45.2365	29.9744	39.1171
AP002884.2	ENSG00000255292	0.0608905	35.4214	5.14655	0.0432156	0.846032	1	0.311788	0	0.213706	0	0	0
BUD13	ENSG00000137656	5.11026	1.34647	0.429183	0.042298	0.846032	1	12.1462	14.0989	14.9651	12.6949	11.2593	9.57535
AP001267.3	ENSG00000255435	0.0668576	-2.52422	-1.33583	0.0422823	0.846032	1	0.0590683	0.0660685	0.0787242	0.190278	0.192356	0.191361
FAM118B	ENSG00000197798	1.12172	1.51154	0.596019	0.040794	0.846032	1	3.46461	3.13287	2.61459	2.30459	1.61178	2.62383
BCAT1	ENSG00000060982	93.5292	-1.3667	-0.450699	0.0384829	0.846032	1	209.652	176.142	168.311	218.358	220.387	366.188
AC008124.1	ENSG00000273015	0.939347	-1.5038	-0.588612	0.0425862	0.846032	1	2.32607	1.56287	1.20665	2.18474	3.02865	2.82191
DGKA	ENSG00000065357	0.0614758	-1.83377	-0.87481	0.0387955	0.846032	1	0.167967	0.0704521	0.0419738	0.152177	0.205119	0.168348
DEPDC4	ENSG00000166153	1.02552	-1.82517	-0.868029	0.043279	0.846032	1	1.90393	1.18362	1.54968	1.74138	1.55507	5.56779
TCP11L2	ENSG00000166046	0.254317	-1.75416	-0.810784	0.0437925	0.846032	1	0.37654	0.329314	0.448452	0.774227	0.5123	0.911002
AC007541.1	ENSG00000260329	0.717385	-1.90793	-0.932008	0.04024	0.846032	1	1.01029	1.3318	0.66362	1.9178	1.63432	2.63008
UBAC2-AS1	ENSG00000228889	1.36242	-1.71686	-0.779773	0.0399686	0.846032	1	2.3396	2.53791	1.51606	2.94317	3.6542	5.09656
MMP14	ENSG00000157227	0.0509482	-1.92835	-0.947364	0.0437103	0.846032	1	0.130786	0.039896	0.0475382	0.103411	0.137275	0.196444
SLC25A21-AS1	ENSG00000258708	0.334956	-1.93386	-0.951482	0.0429658	0.846032	1	0.550977	0.554646	0.286386	0.505839	1.29676	1.04421
AL136040.1	ENSG00000273783	1.018	-1.91628	-0.938307	0.0386067	0.846032	1	1.78243	1.6133	0.900215	1.94919	3.4577	3.28234
CYP46A1	ENSG00000036530	0.0111159	-3.39692	-1.76423	0.0411205	0.846032	1	0.0169921	0.00475145	0.00452929	0.0383159	0.0402434	0.0165146
GPR176-DT	ENSG00000246863	0.235969	-2.1794	-1.12393	0.0417316	0.846032	1	0.208116	0.404303	0.227736	0.243465	1.09929	0.649386
RTF1	ENSG00000137815	13.2403	1.31726	0.397537	0.0429123	0.846032	1	45.2968	28.8747	35.4654	37.8623	24.6143	26.6857
CAPN3	ENSG00000092529	0.0574158	-2.46226	-1.29999	0.0388595	0.846032	1	0.053057	0.0623121	0.067884	0.0615289	0.122517	0.309396
EIF3J-DT	ENSG00000179523	2.0161	-1.56514	-0.646288	0.0419202	0.846032	1	5.15764	3.00033	2.47952	5.90405	4.34892	7.14608
CSNK1G1	ENSG00000169118	5.0778	-1.35199	-0.435081	0.0413474	0.846032	1	11.38	9.60661	9.30286	9.36795	15.3098	18.7729
SCAMP2	ENSG00000140497	2.61486	1.34942	0.432335	0.0407125	0.846032	1	9.3711	5.46908	6.90029	7.37609	4.6604	5.16175
C15orf39	ENSG00000167173	8.74094	1.31261	0.392436	0.0427933	0.846032	1	24.8088	22.9709	23.5465	22.2198	22.1957	14.5308
SNN	ENSG00000184602	1.61578	1.63984	0.713554	0.0402864	0.846032	1	7.35625	3.0787	3.32432	4.64521	1.86049	2.30426
AC010654.1	ENSG00000277369	0.674678	-2.02806	-1.0201	0.0402249	0.846032	1	1.50878	0.825447	0.419654	2.28221	1.86435	1.65764
ITGAM	ENSG00000169896	0.0284557	-3.34515	-1.74207	0.0404818	0.846032	1	0.0186371	0.0156344	0.0298067	0.0450271	0.140694	0.0543401
HSBP1	ENSG00000230989	10.1204	1.35172	0.434794	0.0432987	0.846032	1	32.5193	24.8364	26.0133	29.8009	23.397	13.5068
PFN1	ENSG00000108518	67.8861	1.44198	0.528048	0.0413861	0.846032	1	238.585	142.41	182.446	178.571	99.7643	138.91
CENPV	ENSG00000166582	11.013	1.33942	0.421603	0.0415629	0.846032	1	38.758	23.4958	29.1639	34.1665	18.8134	20.2081
AC125257.2	ENSG00000274630	1.60425	2.88067	1.5264	0.0386454	0.846032	1	4.75677	4.84545	3.53209	2.29846	0.603522	1.98132
SGCA	ENSG00000108823	9.83837	-1.52379	-0.607666	0.0423957	0.846032	1	12.8777	20.8976	17.0302	28.4664	20.6444	35.8224
RAB37	ENSG00000172794	0.0173268	-4.57769	-2.19462	0.0427724	0.846032	1	0.0104503	0.0175332	0	0	0.0464065	0.101566
CBX2	ENSG00000173894	0.753119	1.47606	0.561752	0.0403625	0.846032	1	3.88814	1.37995	1.24069	2.07746	1.37796	1.09006
AC120024.1	ENSG00000260369	1.70654	-1.80603	-0.852818	0.0408164	0.846032	1	3.03641	2.05563	2.47069	3.19177	6.95476	4.34896
AP000894.4	ENSG00000273355	1.46775	-2.02254	-1.01617	0.0434887	0.846032	1	2.41426	2.48557	0.965292	3.39364	4.48331	4.69283
EPOR	ENSG00000187266	0.103826	-2.09277	-1.06541	0.0387701	0.846032	1	0.120581	0.115604	0.151523	0.16647	0.382472	0.334835
PRDX2	ENSG00000167815	35.4665	1.41755	0.5034	0.0401036	0.846032	1	116.51	74.7626	101.399	101.287	57.8598	63.342
GPI	ENSG00000105220	14.7252	1.38104	0.465758	0.0397929	0.846032	1	55.0338	28.9849	38.8768	44.3931	23.8503	26.6833
KIRREL2	ENSG00000126259	5.49885	-1.40211	-0.487595	0.0427944	0.846032	1	10.4691	11.8063	8.93571	14.6156	15.6313	16.9532
TOMM40	ENSG00000130204	17.7352	1.32756	0.408775	0.0417949	0.846032	1	65.6016	38.9215	43.3596	49.6904	31.6352	37.0875
CD3EAP	ENSG00000117877	16.234	1.433	0.519036	0.0418277	0.846032	1	39.829	50.9619	40.3938	40.2675	42.42	17.9266
FAM83E	ENSG00000105523	0.0512643	2.80132	1.48611	0.0432587	0.846032	1	0.209585	0.0879085	0.134077	0.0607625	0.0558419	0.040739
MYBL2	ENSG00000101057	21.9715	1.50961	0.594179	0.040566	0.846032	1	87.5062	40.4598	56.5236	60.9101	27.2511	41.2895
SULF2	ENSG00000196562	0.328288	-1.46209	-0.548027	0.0426605	0.846032	1	1.02712	0.247134	0.592131	0.984906	0.813218	1.02921
POLR2F	ENSG00000100142	3.03454	1.44271	0.528786	0.0425433	0.846032	1	11.1181	6.01484	8.14679	8.63947	5.05811	5.02795
MAFF	ENSG00000185022	0.123873	-1.9146	-0.937043	0.043344	0.846032	1	0.160589	0.134716	0.21151	0.200838	0.545332	0.302972
CACNA1F	ENSG00000102001	3.52833	-1.40065	-0.486099	0.040974	0.846032	1	9.92294	5.37831	5.4205	9.51556	9.18664	11.6368
TSR2	ENSG00000158526	6.45892	1.33939	0.421581	0.0410667	0.846032	1	24.5514	13.6359	15.806	16.8523	11.4107	14.3952
SYTL4	ENSG00000102362	0.355014	1.63582	0.710014	0.0415513	0.846032	1	0.949048	0.879944	1.05563	0.882677	0.538685	0.506267
TSC22D3	ENSG00000157514	1.52763	-1.8497	-0.887293	0.042196	0.846032	1	1.26782	2.87347	2.33002	2.54717	3.53604	7.0473
UBA6-AS1	ENSG00000248049	0.870803	-1.40918	-0.494855	0.0438988	0.846846	1	2.05232	1.74114	1.22622	2.27524	2.10818	3.11239
LINC01355	ENSG00000261326	1.05614	-1.57213	-0.652724	0.0443565	0.854152	1	2.54645	1.59674	1.39867	2.34488	2.42912	4.31648
ACAP2	ENSG00000114331	2.7278	-1.31246	-0.392277	0.0445337	0.854152	1	6.68282	5.30956	4.8092	6.14896	7.93346	9.29915
PLAC8L1	ENSG00000173261	0.287061	-2.01377	-1.0099	0.0445287	0.854152	1	0.437823	0.413192	0.284464	0.66111	1.11793	0.664874
SLC16A7	ENSG00000118596	0.0364611	-2.08084	-1.05717	0.0446314	0.854152	1	0.0502847	0.0259588	0.0618625	0.0934518	0.106496	0.112781
UCHL3	ENSG00000118939	6.05355	1.35996	0.443565	0.0445955	0.854152	1	19.5322	13.3509	16.9985	15.8374	10.3045	13.2504
RIOX1	ENSG00000170468	6.1209	1.38229	0.467057	0.0445605	0.854152	1	16.9862	16.5431	16.3377	15.0839	15.5259	8.62061
SNTB2	ENSG00000168807	3.92878	1.34822	0.431055	0.0444709	0.854152	1	13.5207	7.31688	11.709	8.92185	6.81213	9.9325
TNFAIP8L1	ENSG00000185361	0.22526	1.98503	0.98916	0.0446678	0.854152	1	1.25575	0.233355	0.476666	0.337952	0.204703	0.455743
AC234775.3	ENSG00000261101	0.390527	2.34979	1.23253	0.0446656	0.854152	1	1.05038	1.22005	0.90456	0.546585	0.358801	0.549697
NAGS	ENSG00000161653	0.109575	-2.23086	-1.1576	0.0447753	0.855378	1	0.231206	0.0808144	0.092443	0.242056	0.410685	0.280886
RN7SL431P	ENSG00000264384	0.333214	4.19531	2.06878	0.0449867	0.856094	1	1.73784	0.72892	0.416903	0.167944	0.154343	0.3378
CPLX1	ENSG00000168993	1.87181	1.75911	0.814848	0.044946	0.856094	1	7.40115	3.57757	4.7275	3.81609	2.40484	3.20183
GKAP1	ENSG00000165113	2.70653	-1.47709	-0.562754	0.0448968	0.856094	1	4.11318	4.80976	5.53174	5.40535	8.21939	9.53971
PSMB3	ENSG00000277791	29.9442	1.5071	0.591772	0.044904	0.856094	1	107.687	57.4074	83.9356	76.4395	35.2657	64.3048
AC253572.2	ENSG00000287979	6.93961	-1.96104	-0.971615	0.0461451	0.856322	1	11.433	9.21817	7.52723	7.10561	37.1359	14.0565
LINC02798	ENSG00000227082	0.144769	1.80736	0.853882	0.0456102	0.856322	1	0.51471	0.366076	0.322116	0.140574	0.318005	0.239248
U1_9	ENSG00000273768	81.3853	-1.49149	-0.576757	0.0453057	0.856322	1	109.24	154.269	160.236	235.812	268.096	192.865
AL358472.5	ENSG00000284738	0.561682	-1.97868	-0.984538	0.0454439	0.856322	1	0.920353	0.736974	0.635609	1.21285	1.2261	2.39886
PFDN2	ENSG00000143256	47.887	1.33617	0.418099	0.0461725	0.856322	1	174.973	96.1599	127.701	126.614	86.4931	104.107
TMSB10	ENSG00000034510	274.991	1.53769	0.620765	0.0459703	0.856322	1	1039.73	573.018	684.873	839.677	410.5	350.879
AC061961.1	ENSG00000287900	0.0352591	-2.35108	-1.23333	0.0456599	0.856322	1	0.0374639	0.0565701	0.0239667	0.086892	0.119783	0.0946689
KCNH8	ENSG00000183960	0.09253	-1.9758	-0.982435	0.0460961	0.856322	1	0.156713	0.0584285	0.160128	0.26924	0.255168	0.270772
AL109615.4	ENSG00000287562	1.40896	-1.6944	-0.760773	0.0453576	0.856322	1	1.73403	2.31632	2.40232	2.29483	6.38584	3.24179
NDUFB2	ENSG00000090266	6.16553	1.38295	0.467744	0.0455733	0.856322	1	22.5508	12.8883	15.917	18.0034	11.7819	9.90439
PSMD13	ENSG00000185627	8.94662	1.31408	0.394058	0.045627	0.856322	1	29.849	19.6902	24.3858	24.2504	16.6879	19.3283
PELI3	ENSG00000174516	2.96695	1.4463	0.532362	0.0453037	0.856322	1	9.24802	7.33895	7.79471	7.24113	6.07918	4.84178
ATF7-NPFF	ENSG00000267281	0.0436338	3.34526	1.74212	0.0457994	0.856322	1	0.295561	0.0330588	0.0630262	0.0380839	0.0349998	0.0383007
GOLGA8B	ENSG00000215252	9.17441	-1.33393	-0.415682	0.0456142	0.856322	1	21.0426	17.8784	16.4125	20.1419	28.0914	30.3109
AC092078.3	ENSG00000287439	0.0436801	-3.28176	-1.71447	0.0461377	0.856322	1	0	0.0773865	0.0210766	0.038207	0.0936344	0.243355
HEXA-AS1	ENSG00000260339	0.220095	-2.16355	-1.1134	0.0455773	0.856322	1	0.297108	0.299086	0.205907	0.593389	0.96753	0.308009
LINC01569	ENSG00000262468	0.633701	-1.6166	-0.692959	0.0458718	0.856322	1	0.890653	1.12073	1.07642	1.39868	1.95058	2.07553
AC135048.3	ENSG00000275263	0.851334	-2.3676	-1.24343	0.0458978	0.856322	1	1.29278	0.813368	0.775337	2.81101	1.72225	2.82701
PSMB6	ENSG00000142507	13.5043	1.37747	0.46202	0.0457088	0.856322	1	49.8171	27.84	34.9157	33.594	20.8859	32.112
TVP23C-CDRT4	ENSG00000259024	0.0203674	-28.0125	-4.808	0.045552	0.856322	1	0	0	0	0	0.167201	0
UBTF	ENSG00000108312	21.3891	1.32329	0.404131	0.0450757	0.856322	1	69.8913	50.104	56.4407	60.5474	40.619	42.181
CBX4	ENSG00000141582	2.45228	-1.62004	-0.696032	0.045094	0.856322	1	3.74016	4.67557	3.60662	2.49824	9.31399	9.01636
KCNN1	ENSG00000105642	0.0453682	-2.33991	-1.22645	0.0461413	0.856322	1	0.106514	0.0446763	0.0106468	0.154402	0.0709491	0.168221
COX6B1	ENSG00000126267	32.5082	1.3069	0.386144	0.0456657	0.856322	1	106.008	71.162	90.9314	92.3807	68.738	59.6423
MAP3K10	ENSG00000130758	0.667055	-1.55437	-0.636328	0.0453669	0.856322	1	1.34572	1.19263	0.911228	1.91928	1.86024	1.9513
SERTAD1	ENSG00000197019	0.375127	-1.90173	-0.927315	0.0460199	0.856322	1	0.508675	0.57607	0.467782	0.639056	1.64897	0.889885
ELF4	ENSG00000102034	0.326911	1.70722	0.771649	0.0461078	0.856322	1	1.26492	0.834475	0.63833	0.605274	0.665328	0.417749
TRDN	ENSG00000186439	0.0675626	-2.80722	-1.48914	0.0462267	0.856521	1	0.0217074	0.0182099	0.138868	0.393336	0.0963954	0.100212
ATAD3B	ENSG00000160072	3.36216	1.33387	0.415623	0.0473625	0.856613	1	13.3648	6.9768	7.88586	9.40351	6.85358	6.11927
AC093157.1	ENSG00000233184	0.410955	-1.59722	-0.675567	0.0471212	0.856613	1	0.70364	0.806554	0.541196	0.929153	1.28802	1.29987
TMCO1-AS1	ENSG00000224358	0.444678	-1.81533	-0.860229	0.0467751	0.856613	1	0.764243	0.723834	0.473136	1.14358	1.59835	1.05425
AC019129.2	ENSG00000273106	0.225546	-2.48326	-1.31223	0.0466506	0.856613	1	0.128755	0.288027	0.274559	0.373284	0.876695	0.667393
MREG	ENSG00000118242	10.499	1.34412	0.426661	0.0466448	0.856613	1	26.706	29.1987	29.1266	32.06	21.5705	15.9018
TM4SF18	ENSG00000163762	0.0115721	6.84473	2.77499	0.0465769	0.856613	1	0.0608262	0.0102052	0.0291841	0	0.0108044	0
HSD17B13	ENSG00000170509	0.0727555	-2.8677	-1.51989	0.0466189	0.856613	1	0.0222987	0.112236	0.053494	0.215494	0.336672	0.0650161
MIR4453HG	ENSG00000268471	3.54394	-1.4461	-0.532169	0.0470795	0.856613	1	8.72799	6.0323	5.14273	8.87862	10.9841	10.4918
MSMO1	ENSG00000052802	16.0658	1.4129	0.498663	0.0472543	0.856613	1	51.3313	40.4729	40.4828	44.7032	29.5125	26.8229
AC099522.2	ENSG00000272525	0.694523	-1.92091	-0.941787	0.0472162	0.856613	1	1.3536	0.717163	0.854538	1.51465	2.34108	2.07719
GABBR1	ENSG00000204681	3.69671	-1.36757	-0.451615	0.0464789	0.856613	1	9.48914	6.5478	5.8312	9.12792	12.597	9.86731
TRIP6	ENSG00000087077	0.147648	1.77128	0.824788	0.0472717	0.856613	1	0.622843	0.208997	0.415052	0.341084	0.350341	0.040356
SVEP1	ENSG00000165124	0.00447551	-4.73935	-2.24469	0.0464977	0.856613	1	0	0.00626564	0	0.00721804	0.0232173	0.00725913
ZBTB26	ENSG00000171448	4.50278	-1.36739	-0.451428	0.0469764	0.856613	1	11.245	10.3594	5.12407	11.692	12.8983	14.0484
ATP5MD	ENSG00000173915	27.2841	1.4024	0.487896	0.0466698	0.856613	1	108.303	50.768	69.9538	72.6765	40.0441	59.6542
LDHA	ENSG00000134333	102.199	1.57602	0.656288	0.0472859	0.856613	1	408.951	207.084	242.546	267.999	152.622	156.753
PAN3-AS1	ENSG00000261485	1.06978	-1.78451	-0.835529	0.0466645	0.856613	1	2.39322	1.57978	0.941194	2.08531	3.86772	3.16484
DAD1	ENSG00000129562	23.0843	1.37318	0.457524	0.0472594	0.856613	1	83.0233	53.1115	55.8637	71.8197	44.4148	33.7112
FRMD6	ENSG00000139926	1.87272	-1.43986	-0.525926	0.046917	0.856613	1	5.1	2.68692	2.95741	5.10814	3.93456	7.1177
RPS6KA5	ENSG00000100784	0.548334	-1.47083	-0.556628	0.0469664	0.856613	1	0.856186	1.21719	0.845218	1.40221	1.97505	1.30342
POLR3K	ENSG00000161980	7.72037	1.46754	0.553399	0.0467804	0.856613	1	30.288	15.9633	18.4825	23.3778	10.4778	13.0647
PRKCB	ENSG00000166501	0.0427222	2.43244	1.2824	0.0472723	0.856613	1	0.273439	0.0684125	0.038361	0.0741755	0.0255632	0.0559483
RFFL	ENSG00000092871	0.245706	-1.51436	-0.598706	0.0473313	0.856613	1	0.429661	0.517146	0.343582	0.613807	0.730012	0.762549
TK1	ENSG00000167900	12.2012	1.50891	0.593506	0.0472694	0.856613	1	41.2253	27.9075	31.7946	34.7038	15.1302	22.1135
AC008763.2	ENSG00000268400	0.180378	2.77165	1.47075	0.0472525	0.856613	1	0.853651	0.130202	0.558515	0	0.103385	0.452543
GEMIN7-AS1	ENSG00000267348	0.226786	-1.92209	-0.942675	0.0466099	0.856613	1	0.501327	0.242138	0.230816	0.4698	0.661124	0.812065
MYCBP	ENSG00000214114	3.93036	1.57083	0.651531	0.0474134	0.856747	1	15.4635	7.48818	10.0116	11.8036	4.43076	6.13046
SEC13	ENSG00000157020	5.77534	1.3008	0.379399	0.0475917	0.856825	1	20.0095	13.5211	14.3463	17.0901	12.1624	10.188
FAM20A	ENSG00000108950	0.179081	-2.34058	-1.22687	0.0475391	0.856825	1	0.248684	0.201423	0.17829	0.52209	0.106624	0.933444
IQCN	ENSG00000130518	0.0731335	1.9458	0.960364	0.0475535	0.856825	1	0.22003	0.0874321	0.291704	0.139892	0.0977081	0.0956681
FKBP1A	ENSG00000088832	37.349	1.31084	0.390493	0.0474833	0.856825	1	132.911	80.6979	96.7275	109.363	69.0319	74.523
AC016355.1	ENSG00000270964	1.05692	-1.79293	-0.842317	0.0477071	0.857529	1	1.65962	2.05933	1.02299	2.4726	2.39519	4.23406
NUTF2	ENSG00000102898	29.551	1.34467	0.427254	0.0477179	0.857529	1	98.667	73.8627	71.6793	79.7798	63.0501	52.0568
ARL15	ENSG00000185305	3.59011	1.37183	0.4561	0.0478151	0.857591	1	9.56861	10.7884	8.81164	8.37089	8.2133	6.50709
SYNGAP1	ENSG00000197283	3.30126	-1.44381	-0.529879	0.0478279	0.857591	1	5.84024	7.8109	4.39367	7.26539	12.4611	8.39591
CDR2	ENSG00000140743	14.9669	1.32283	0.403633	0.047852	0.857591	1	35.1034	42.6405	42.8572	32.2509	41.5807	25.9268
IPO13	ENSG00000117408	5.04023	1.37189	0.45616	0.0492654	0.85812	1	16.5846	10.0202	14.9919	16.1687	8.12113	8.49094
DDAH1	ENSG00000153904	14.8852	1.28257	0.359039	0.048408	0.85812	1	50.2192	35.3813	37.5155	39.4752	30.3364	32.7931
MGST3	ENSG00000143198	2.65881	1.42181	0.507725	0.0499831	0.85812	1	8.93932	5.86449	7.17999	7.58927	4.54845	4.4976
ACTN2	ENSG00000077522	2.89442	-1.62012	-0.696104	0.048413	0.85812	1	4.6349	4.96654	4.57348	11.4768	5.50668	8.09986
SNRPG	ENSG00000143977	23.4328	1.46263	0.548564	0.0495536	0.85812	1	78.5745	49.0013	66.1246	63.6801	45.7137	33.2624
COX5B	ENSG00000135940	32.241	1.31146	0.391172	0.0499901	0.85812	1	103.206	75.0782	87.2195	90.1002	63.4298	64.3658
LCT	ENSG00000115850	0.00963059	-4.7393	-2.24467	0.0488248	0.85812	1	0	0	0.012883	0.0233539	0.0500795	0.00782894
PJVK	ENSG00000204311	1.16567	-1.66424	-0.734867	0.0500599	0.85812	1	1.87501	2.20677	1.47699	2.46108	4.17558	3.30465
BRPF1	ENSG00000156983	3.88174	1.30488	0.383916	0.0491181	0.85812	1	11.5064	9.45564	10.8134	9.58276	9.23896	7.45815
IL17RD	ENSG00000144730	0.265816	1.48338	0.56889	0.0499659	0.85812	1	1.00897	0.725489	0.487644	0.428598	0.566216	0.576513
AC097634.4	ENSG00000285708	0.473798	1.78593	0.836678	0.0486716	0.85812	1	1.19738	1.55356	1.08516	1.21886	0.411195	0.729271
MAATS1	ENSG00000183833	0.0784624	-1.98569	-0.989639	0.0498891	0.85812	1	0.111886	0.112631	0.0894704	0.22346	0.218613	0.231982
SOX2	ENSG00000181449	2.28223	1.729	0.789937	0.0479458	0.85812	1	7.74381	4.40747	6.73235	6.46403	2.54863	2.80951
YEATS2	ENSG00000163872	7.85414	-1.2893	-0.366587	0.0495854	0.85812	1	17.535	16.0005	15.2565	19.4138	22.1847	25.7975
FSTL5	ENSG00000168843	0.57619	1.77971	0.831644	0.0494629	0.85812	1	1.49335	1.05231	2.12562	1.08719	1.04335	0.735368
AC117528.1	ENSG00000286577	0.159166	-2.86642	-1.51925	0.0486865	0.85812	1	0.248678	0	0.198858	0.308985	0.66258	0.379798
CREBRF	ENSG00000164463	0.667072	-1.53764	-0.62072	0.0479878	0.85812	1	1.19047	1.04193	1.22347	1.3789	2.18331	2.1386
TRIM39-RPP21	ENSG00000248167	0.369762	2.74832	1.45855	0.049732	0.85812	1	1.15497	0.785585	1.09832	0	0.91488	0.242706
MTCH1	ENSG00000137409	12.2739	1.31435	0.394351	0.0497025	0.85812	1	46.476	25.4467	30.6431	33.9847	19.2003	29.4486
Z99496.2	ENSG00000286339	2.18741	-1.8509	-0.888227	0.0496213	0.85812	1	3.27618	2.45387	3.74261	4.2403	5.5596	8.98375
GLI3	ENSG00000106571	0.0385503	1.79796	0.846364	0.0489455	0.85812	1	0.133692	0.140189	0.0458176	0.101514	0.0466464	0.0417647
AC079760.2	ENSG00000243144	0.297191	-2.74421	-1.45639	0.0481412	0.85812	1	0.100045	0.604269	0.128003	0.135357	1.04847	1.34183
LINC01003	ENSG00000261455	2.61712	-1.53516	-0.618392	0.0490343	0.85812	1	5.55881	3.98261	4.2289	7.49177	6.51147	8.52733
AC100812.1	ENSG00000272192	0.250227	-2.69348	-1.42947	0.0491104	0.85812	1	0.274159	0.383311	0.0730778	0.706522	0.73047	0.710544
RNU2-25P	ENSG00000222973	0.273685	-6.71106	-2.74654	0.0487124	0.85812	1	0	0.232796	0	0.804547	0.739393	0.809127
BX005266.2	ENSG00000226007	0.335507	-1.92013	-0.941206	0.0485587	0.85812	1	0.786272	0.407394	0.258897	0.782199	0.801009	1.30359
SLC31A1	ENSG00000136868	7.40786	1.31262	0.392453	0.0499801	0.85812	1	25.2812	15.5905	20.4552	22.0721	13.7793	14.2879
SYNPO2L	ENSG00000166317	0.684821	-1.96197	-0.972306	0.0483324	0.85812	1	0.768475	0.940855	1.03804	3.29175	0.664063	2.02868
NELL1	ENSG00000165973	0.250057	-1.81383	-0.859037	0.0500044	0.85812	1	0.418925	0.209184	0.470591	1.06995	0.487224	0.610728
AC010197.2	ENSG00000285854	0.0438354	2.33153	1.22128	0.0494337	0.85812	1	0.133615	0.0862209	0.139722	0.0993268	0.0182566	0.0499461
TMTC1	ENSG00000133687	0.562757	-1.56146	-0.6429	0.0487004	0.85812	1	0.862881	1.00855	0.970056	1.82129	1.45255	1.572
AC034102.5	ENSG00000257809	0.304505	2.38209	1.25223	0.0498807	0.85812	1	0.785244	0.741068	0.941891	0.284571	0.348702	0.476985
KCNRG	ENSG00000198553	0.446211	2.10732	1.07541	0.0488915	0.85812	1	0.815446	0.957688	1.77365	0.725	0.666288	0.475518
LINC02588	ENSG00000257842	0.0110514	27.7593	4.7949	0.0500305	0.85812	1	0.0413932	0.026043	0.0248253	0	0	0
RPUSD2	ENSG00000166133	6.4219	1.45864	0.544629	0.0480869	0.85812	1	13.6929	16.2743	21.4906	13.0269	17.6081	8.27874
GABPB1-IT1	ENSG00000285410	2.75401	-1.36657	-0.450557	0.0492642	0.85812	1	6.83345	5.22975	4.24852	7.04465	8.26151	8.30177
SMAD6	ENSG00000137834	1.97421	1.67418	0.743457	0.0490299	0.85812	1	10.9589	2.07873	4.18105	4.71758	3.19663	2.60101
TIGD7	ENSG00000140993	6.3176	-1.44088	-0.526951	0.0487155	0.85812	1	15.197	12.6948	7.71941	14.3028	19.8646	19.8965
AC099518.4	ENSG00000261465	0.0746095	-3.21209	-1.68351	0.0487877	0.85812	1	0.0402155	0.0674721	0.0643173	0.116592	0.357168	0.156341
JMJD6	ENSG00000070495	3.43468	1.39192	0.477072	0.0486406	0.85812	1	11.8102	8.20154	8.44294	7.0883	9.62157	5.08326
AC132938.6	ENSG00000287193	0.209742	-2.20825	-1.1429	0.0494258	0.85812	1	0.528819	0.204746	0.0650577	0.471737	0.614175	0.711635
RNU6-2	ENSG00000207357	1.02937	-3.55979	-1.83179	0.0487628	0.85812	1	0	1.66221	0.396122	0.957436	4.83946	2.88866
DNMT1	ENSG00000130816	11.8553	1.31106	0.39073	0.0483128	0.85812	1	43.27	25.6681	29.7942	32.8221	22.879	24.4268
PLEKHF1	ENSG00000166289	0.049241	2.7732	1.47155	0.0495384	0.85812	1	0.207587	0.116094	0.0922217	0.0668705	0.0409702	0.0448341
AC011462.4	ENSG00000277744	1.13039	-2.08514	-1.06014	0.0494959	0.85812	1	2.00683	1.18835	1.22719	2.05348	2.72593	4.93345
AC021092.1	ENSG00000186019	1.90126	-1.65578	-0.727515	0.0495619	0.85812	1	2.89741	3.50837	2.55784	3.408	9.47475	3.16045
AC008750.7	ENSG00000268889	0.334523	-3.17279	-1.66575	0.0491614	0.85812	1	0.379277	0.159084	0.303292	0.366532	0.842124	1.65878
ZNF471	ENSG00000196263	0.0599999	-1.9303	-0.948828	0.0487328	0.85812	1	0.109512	0.078744	0.0625518	0.105832	0.215365	0.190062
TMEM50B	ENSG00000142188	3.87542	1.39639	0.481706	0.0493221	0.85812	1	13.7801	7.96923	10.4489	11.0764	6.83206	6.77152
BEX1	ENSG00000133169	0.834022	1.93257	0.950519	0.0484891	0.85812	1	4.80036	1.23045	1.27955	1.41749	0.651348	1.74955
Z83847.1	ENSG00000261202	0.221785	-2.62158	-1.39044	0.0501363	0.858683	1	0.398526	0.151962	0.144857	0.175061	1.09401	0.598596
PTCH2	ENSG00000117425	0.168854	-2.05439	-1.03871	0.0502687	0.858856	1	0.288173	0.0833598	0.301956	0.316902	0.291238	0.849882
DOCK10	ENSG00000135905	0.00804646	3.05654	1.6119	0.0503209	0.858856	1	0.0282311	0.0197355	0.0188127	0.00454708	0.00835769	0.00914593
FSTL1	ENSG00000163430	2.09933	1.34088	0.423182	0.0502844	0.858856	1	7.149	5.3985	4.83071	5.55363	4.94821	3.3767
MT3	ENSG00000087250	2.72845	1.69919	0.764843	0.0502051	0.858856	1	10.445	6.70471	5.67596	4.71239	3.02385	6.36569
STAC3	ENSG00000185482	2.68168	-1.94809	-0.962062	0.0503854	0.859214	1	1.52092	3.89141	5.02702	15.384	2.7691	5.32143
RAB3C	ENSG00000152932	0.0162551	-2.60698	-1.38238	0.0506512	0.859739	1	0.0110184	0.0277294	0.00881096	0.0106481	0.0831795	0.042835
USP2	ENSG00000036672	8.10578	1.354	0.437228	0.0507101	0.859739	1	25.0196	19.1796	22.3592	17.5424	11.5007	23.485
AC025162.2	ENSG00000273973	0.374469	-2.35652	-1.23666	0.0506275	0.859739	1	0.5679	0.317601	0.378438	0.731755	1.00874	1.47184
MPDU1	ENSG00000129255	3.29299	1.39057	0.475673	0.0507218	0.859739	1	11.5835	8.47386	7.2789	9.96432	5.02226	6.07526
CYTH1	ENSG00000108669	8.78196	1.31201	0.391778	0.050492	0.859739	1	30.33	19.6172	22.8324	22.5661	16.325	20.2364
PLIN5	ENSG00000214456	0.0734415	-2.31198	-1.20913	0.0506602	0.859739	1	0.0550405	0.0646415	0.123238	0.0851054	0.332407	0.203276
BHMG1	ENSG00000237452	0.0605109	2.86545	1.51876	0.0506534	0.859739	1	0.0385624	0.24262	0.18502	0.0558998	0.0856215	0.0374787
AC006213.4	ENSG00000277806	1.36944	-1.95445	-0.96676	0.0507716	0.859844	1	3.17689	1.05199	1.53763	4.84759	4.30652	2.6001
RNVU1-15	ENSG00000207205	25.7618	-1.7901	-0.840042	0.0509905	0.859853	1	40.797	42.5777	31.0824	33.2172	111.838	73.0568
LRRIQ1	ENSG00000133640	0.0919646	-1.73812	-0.797526	0.0509731	0.859853	1	0.198923	0.126419	0.106047	0.27962	0.203439	0.310504
PAQR5	ENSG00000137819	6.12375	1.37277	0.457093	0.0508737	0.859853	1	16.7506	16.9999	16.09	17.2107	12.8386	9.58025
BCO1	ENSG00000135697	0.709673	1.7234	0.785259	0.0508968	0.859853	1	3.88315	0.876384	1.41862	1.71441	0.350128	1.59007
AL022318.1	ENSG00000235209	0.0854547	-26.3075	-4.7174	0.0509171	0.859853	1	0	0	0	0.0755499	0.41659	0.22794
RNU1-4	ENSG00000207389	79.844	-1.48898	-0.574324	0.0513412	0.860857	1	107.301	161.86	147.573	243.308	250.587	190.666
NDUFA9	ENSG00000139180	4.03011	1.3326	0.414246	0.0512417	0.860857	1	15.8334	7.62963	10.3322	10.8253	6.47385	9.4591
AC025263.1	ENSG00000247131	0.0413523	-3.16706	-1.66315	0.0514831	0.860857	1	0.0948532	0	0.01517	0.0549995	0.219031	0.0737501
MEGF11	ENSG00000157890	0.111144	1.91984	0.940986	0.0512954	0.860857	1	0.285837	0.140251	0.474396	0.16157	0.196384	0.152006
SLC7A6	ENSG00000103064	3.31331	1.31224	0.392029	0.0512057	0.860857	1	12.9227	7.09035	7.7531	8.65415	6.74357	6.94508
AC009113.1	ENSG00000259877	2.31186	-1.66797	-0.738089	0.0514613	0.860857	1	4.03551	5.33278	1.75231	5.3676	7.0718	7.3592
SYT4	ENSG00000132872	0.0272013	-2.78666	-1.47854	0.0513388	0.860857	1	0.0123036	0	0.0590322	0.0237803	0.0546364	0.155452
AC068473.5	ENSG00000274828	1.82501	-1.6147	-0.691269	0.0514853	0.860857	1	4.14413	2.68244	2.41382	5.78482	3.86231	6.1161
POLR2E	ENSG00000099817	8.93689	1.31526	0.395344	0.0511923	0.860857	1	30.2134	21.6112	22.1064	26.1163	19.9222	14.3648
AP000350.5	ENSG00000272973	0.246168	-2.53027	-1.33929	0.0514871	0.860857	1	0.432333	0.290141	0.0691437	0.752048	0.691146	0.672293
ZNF687-AS1	ENSG00000232671	0.945587	-2.03775	-1.02697	0.0519699	0.861615	1	1.44702	0.809256	1.45712	1.3984	3.56987	3.07316
DLX2	ENSG00000115844	0.271327	-2.3803	-1.25114	0.0519408	0.861615	1	0.588735	0.254423	0.11413	0.224132	1.26758	0.797598
REV3L-IT1	ENSG00000229276	0.23674	3.05859	1.61286	0.0518638	0.861615	1	0.693769	0.465593	0.77669	0.268182	0.123232	0.269709
RASSF10-DT	ENSG00000254670	0.0950338	-4.7344	-2.24318	0.0519071	0.861615	1	0.0791104	0	0.0632613	0.076452	0.491825	0.230662
AP003068.2	ENSG00000254614	0.395453	-1.75832	-0.814195	0.0518338	0.861615	1	0.680676	0.571007	0.544309	1.28701	1.02508	1.09299
KIF5A	ENSG00000155980	0.286297	-1.81327	-0.858595	0.0517653	0.861615	1	0.417824	0.58656	0.245474	0.428505	1.22685	0.770728
PPP1R12A-AS1	ENSG00000257557	0.330188	-2.01993	-1.01431	0.0517612	0.861615	1	0.606415	0.329975	0.406289	0.491004	0.858815	1.4814
AKT1	ENSG00000142208	5.45786	1.33221	0.413823	0.0516574	0.861615	1	19.2414	12.2573	13.8145	16.1029	8.77221	11.4825
AC132938.1	ENSG00000260011	0.433121	-2.9054	-1.53873	0.051928	0.861615	1	0.736166	0.123511	0.353209	1.42286	1.69992	0.572383
NYX	ENSG00000188937	0.0791783	2.43822	1.28583	0.051924	0.861615	1	0.195128	0.104166	0.340443	0.0857142	0.0945275	0.103443
AC025259.3	ENSG00000259884	0.107865	-3.21236	-1.68363	0.0521818	0.863705	1	0.173784	0.0971893	0	0.44785	0.205791	0.2815
TMEM132C	ENSG00000181234	0.00911258	6.11923	2.61335	0.0522275	0.863705	1	0.0535718	0.0179762	0.00856784	0.0103543	0	0
AL137002.2	ENSG00000283828	0.460935	-1.94326	-0.958481	0.05221	0.863705	1	1.11313	0.417223	0.435593	1.1215	1.68274	1.12789
AC244517.10	ENSG00000279983	0.308377	-3.15343	-1.65692	0.0523896	0.864934	1	0.580336	0.162278	0.0773451	1.21514	0.343611	1.12805
SOD1	ENSG00000142168	40.131	1.46389	0.549803	0.0523894	0.864934	1	150.007	72.4771	112.439	119.545	64.1419	61.0315
NCDN	ENSG00000020129	5.5308	1.31454	0.394558	0.0526517	0.865526	1	19.6946	12.9133	13.3526	16.2096	11.1727	9.98439
ESRRG	ENSG00000196482	4.86216	-1.36822	-0.452301	0.0525457	0.865526	1	10.6426	9.52686	8.54927	11.0313	11.7902	18.9969
GREB1	ENSG00000196208	0.121177	1.70793	0.772253	0.0532192	0.865526	1	0.439142	0.29328	0.276158	0.210132	0.181756	0.236191
AC074044.1	ENSG00000272844	0.146555	-3.36427	-1.75029	0.052907	0.865526	1	0.0749703	0.125782	0.119901	0.434706	0.732421	0.0728634
AC112907.3	ENSG00000263826	0.268047	-1.93006	-0.948642	0.0532229	0.865526	1	0.35336	0.352007	0.38853	0.618943	1.00034	0.665395
TAPT1-AS1	ENSG00000263327	1.27226	-1.71821	-0.780904	0.0530288	0.865526	1	2.60895	2.2047	1.2579	2.65105	3.04972	5.23907
AL355499.1	ENSG00000232234	0.0528118	-2.58232	-1.36867	0.052973	0.865526	1	0.057314	0.0480797	0.054998	0.177242	0.111986	0.16711
TTC39B	ENSG00000155158	1.70141	-1.88095	-0.91146	0.0525701	0.865526	1	1.21569	3.8316	1.75679	1.87974	10.4615	1.87356
PAPSS2	ENSG00000198682	0.965948	1.44286	0.528928	0.0528399	0.865526	1	3.45311	2.1889	2.3876	2.7349	1.74095	1.47617
UBASH3B	ENSG00000154127	0.00836043	-3.89715	-1.96242	0.0531553	0.865526	1	0.011826	0.0049603	0	0.0342857	0.0315092	0.00574681
ST8SIA1	ENSG00000111728	0.00398502	4.39203	2.13489	0.053016	0.865526	1	0.0109792	0.0214906	0	0.00353676	0	0.00355689
TSPAN19	ENSG00000231738	0.0740661	-2.14111	-1.09836	0.0532383	0.865526	1	0.0908269	0.0870778	0.0933821	0.16301	0.207428	0.264823
AL359232.1	ENSG00000258561	0.363566	-1.77086	-0.824446	0.0528116	0.865526	1	0.6751	0.566329	0.429111	0.610592	0.9993	1.50573
DDX24	ENSG00000089737	7.08309	1.3487	0.431568	0.0533044	0.865526	1	27.3672	15.0848	16.8516	21.2521	12.1584	13.2931
FGF7	ENSG00000140285	0.0432974	-2.10457	-1.07352	0.0532833	0.865526	1	0.072553	0.0473382	0.0451248	0.116858	0.121714	0.133193
TMEM220	ENSG00000187824	0.023181	-3.26268	-1.70606	0.0526401	0.865526	1	0	0.0380252	0.0120824	0.0438052	0.0805155	0.0734242
PCYT2	ENSG00000185813	1.30984	1.49649	0.581578	0.0530971	0.865526	1	5.14132	2.43692	3.40457	3.98078	1.8292	2.00919
UBE2M	ENSG00000130725	27.1691	1.28759	0.364668	0.0529134	0.865526	1	95.2429	63.3926	66.824	72.4408	49.8295	64.1935
LINC01270	ENSG00000203999	0.0237201	-2.66867	-1.41612	0.0529782	0.865526	1	0.0195984	0.0246612	0.0235081	0.0757594	0.0348121	0.0952384
HUNK	ENSG00000142149	2.89853	1.31429	0.394283	0.0527278	0.865526	1	9.57145	6.28472	8.07335	8.28368	5.04783	6.21964
TNFSF9	ENSG00000125657	0.293799	-2.0388	-1.02772	0.0533866	0.866147	1	0.454134	0.326542	0.363153	0.344829	1.49809	0.630532
ARG2	ENSG00000081181	12.5268	-1.8935	-0.921053	0.0534346	0.866212	1	8.49363	27.1379	16.6274	10.1369	21.7442	76.0086
ANKRD36	ENSG00000135976	6.21017	-1.31499	-0.395047	0.0535597	0.867526	1	19.2361	10.3931	9.33218	15.042	17.9173	20.3013
U1_1	ENSG00000273727	0.89069	-3.88633	-1.95841	0.0538425	0.86788	1	0.327185	0.54894	0.784909	0	5.81169	1.58995
SPRY4	ENSG00000187678	0.76514	-1.66334	-0.734081	0.0537457	0.86788	1	0.807372	1.18526	1.59469	2.19248	1.69225	2.715
AL096865.1	ENSG00000271857	0.457024	2.13587	1.09483	0.0539781	0.86788	1	1.94405	0.959312	0.96018	0.552566	0.5586	0.777996
KDM7A	ENSG00000006459	4.93146	-1.36484	-0.448733	0.0537641	0.86788	1	8.91878	11.7016	8.01331	9.89172	16.2237	16.0179
NUDT5	ENSG00000165609	16.8593	1.28821	0.365371	0.0537438	0.86788	1	58.2467	35.7845	45.6895	46.7857	36.0742	33.1461
AC025423.1	ENSG00000256325	1.22792	-2.01247	-1.00897	0.0539377	0.86788	1	2.26755	1.06999	1.58661	2.46527	3.90191	4.13217
NDFIP2	ENSG00000102471	0.110661	1.52262	0.606556	0.0539485	0.86788	1	0.329019	0.365044	0.21218	0.338477	0.188525	0.113468
AC138150.1	ENSG00000224505	1.14515	-1.87517	-0.907025	0.0538639	0.86788	1	1.67541	1.59713	1.58335	3.6062	2.4349	3.84878
ASXL3	ENSG00000141431	0.543337	1.45206	0.538102	0.0536624	0.86788	1	1.4421	1.65322	1.31793	0.698698	1.2359	1.32602
KTI12	ENSG00000198841	2.1361	1.52132	0.605325	0.0542164	0.868067	1	5.15144	5.3888	6.70022	5.81805	3.61053	3.04623
DQX1	ENSG00000144045	0.0931579	-2.30819	-1.20676	0.0544305	0.868067	1	0.128606	0.123297	0.0734577	0.159794	0.195805	0.446399
WWC1	ENSG00000113645	5.30975	1.28205	0.358458	0.0540975	0.868067	1	16.6957	13.9287	13.0416	12.1437	10.9041	13.3915
AL023583.1	ENSG00000272209	0.081771	-3.73874	-1.90255	0.0542323	0.868067	1	0	0.0778025	0.0741647	0.0448144	0.247111	0.405625
STXBP1	ENSG00000136854	1.66298	-1.53107	-0.614541	0.0543496	0.868067	1	4.05461	2.71348	2.08014	4.79275	4.94202	4.53424
LINC02656	ENSG00000212743	0.0282544	-5.07604	-2.3437	0.0541894	0.868067	1	0	0.0181709	0.0173213	0.0837316	0.134664	0.0210521
POLR2L	ENSG00000177700	32.2089	1.54416	0.626825	0.0542139	0.868067	1	92.4981	97.8526	72.7247	77.6531	79.9768	28.0447
CKMT1B	ENSG00000237289	13.9393	1.34428	0.426839	0.0543308	0.868067	1	46.3899	31.0095	37.7557	33.6417	23.361	34.4122
CEBPA	ENSG00000245848	0.532791	-1.72195	-0.784041	0.0544266	0.868067	1	1.26346	0.700895	0.570349	0.827128	2.22614	1.46562
PRRG2	ENSG00000126460	0.225331	-2.18235	-1.12588	0.0543408	0.868067	1	0.467682	0.156932	0.224392	0.421835	0.83073	0.666657
SLC35B1	ENSG00000121073	2.71675	1.30015	0.378681	0.0545611	0.869447	1	8.86096	6.9282	6.61863	6.43542	6.12179	5.8694
S100A1	ENSG00000160678	2.6654	1.90148	0.927125	0.0548947	0.871075	1	1.48691	6.5889	12.4078	4.29393	3.58886	4.45438
AC008438.1	ENSG00000249637	0.288897	-2.1048	-1.07368	0.0548873	0.871075	1	0.538111	0.270847	0.301214	0.884049	0.764665	0.836783
GLRA1	ENSG00000145888	0.0860323	2.60716	1.38248	0.05497	0.871075	1	0.326647	0.200947	0.191551	0.126268	0.0773619	0.0846581
RUNDC3B	ENSG00000105784	0.313505	1.67919	0.747767	0.0549437	0.871075	1	1.09159	0.896834	0.611929	0.522016	0.40978	0.710921
IL21R	ENSG00000103522	0.159604	2.52096	1.33398	0.0549358	0.871075	1	0.991092	0.0652086	0.357418	0.300482	0.0949261	0.169983
DCTPP1	ENSG00000179958	16.3156	1.36993	0.454099	0.0547871	0.871075	1	44.0553	51.9133	36.7154	47.6638	34.4807	23.7502
FMR1-AS1	ENSG00000268066	0.0801807	-2.68482	-1.42483	0.0549729	0.871075	1	0.133232	0.0558828	0.0532699	0.0643772	0.374704	0.237394
MYLPF	ENSG00000180209	8.18905	-1.96112	-0.971676	0.0550548	0.871671	1	4.89342	13.2498	13.5989	48.9286	7.0569	15.8216
ARHGEF40	ENSG00000165801	0.0579078	-1.87916	-0.910087	0.055197	0.873221	1	0.0776236	0.108528	0.0568997	0.131276	0.241291	0.11945
PSMD12	ENSG00000197170	21.9822	1.35936	0.44293	0.0552918	0.874019	1	74.0984	51.1062	56.5955	57.3212	43.6732	42.2279
PSMB5	ENSG00000100804	38.9821	1.29143	0.368971	0.0553623	0.874174	1	119.49	108.218	92.2403	110.547	91.4751	65.7482
AC008734.2	ENSG00000269400	0.316232	-3.13806	-1.64987	0.0553904	0.874174	1	0.222239	0.0932161	0.444288	0.214771	1.48034	0.97197
MT-ATP6	ENSG00000198899	9903.4	1.28987	0.367222	0.0555015	0.875226	1	29192	27065.2	24782.4	23882.3	22588.4	21242.6
NES	ENSG00000132688	6.80541	-1.62064	-0.69656	0.0556463	0.876065	1	13.2891	9.47897	11.0835	32.0603	7.7866	19.54
C7	ENSG00000112936	0.437409	-1.65759	-0.729084	0.0556881	0.876065	1	0.864626	0.698703	0.558199	1.71714	1.03562	1.02535
SLC25A48	ENSG00000145832	0.00619029	-6.6527	-2.73394	0.0556167	0.876065	1	0	0.00531168	0	0.0367145	0.0168706	0
AC008393.1	ENSG00000245317	0.864304	-1.72858	-0.789589	0.0557695	0.876645	1	0.874894	1.43729	1.57414	2.04328	2.33107	3.04693
SLC9A3R2	ENSG00000065054	1.9111	1.47641	0.562098	0.0558318	0.876924	1	6.72349	3.90768	5.23184	5.05527	3.40073	3.0475
LINC02614	ENSG00000241288	0.0673261	-1.80713	-0.8537	0.0560368	0.877302	1	0.125975	0.0858635	0.0881449	0.159786	0.202788	0.214261
AL512662.2	ENSG00000283913	0.0329295	3.68251	1.88069	0.0561231	0.877302	1	0.0765585	0.107039	0.0816275	0	0.0453295	0.0248023
NDUFS3	ENSG00000213619	8.62555	1.3412	0.423522	0.0559811	0.877302	1	28.3094	18.4384	24.4257	23.3737	14.5569	19.0057
HOXC6	ENSG00000197757	0.123225	1.7843	0.83536	0.056094	0.877302	1	0.352542	0.347175	0.306428	0.237006	0.136133	0.238355
SLIRP	ENSG00000119705	14.18	1.32808	0.409342	0.0559076	0.877302	1	47.3631	28.3921	41.4185	38.1786	26.1407	30.2312
ARL4D	ENSG00000175906	49.8675	1.35339	0.43658	0.0560682	0.877302	1	105.84	124.714	168.923	91.9609	87.5864	142.693
SAMD5	ENSG00000203727	2.22593	1.49003	0.575345	0.0562512	0.878515	1	7.19438	4.1026	7.04587	4.92152	3.39581	4.87097
NANP	ENSG00000170191	12.2503	1.29563	0.373651	0.0562899	0.878515	1	37.5892	26.9965	35.9543	32.9992	29.448	21.3752
LYPLA2	ENSG00000011009	5.23265	1.39341	0.47862	0.056724	0.878996	1	16.6277	14.2567	12.1849	13.5344	10.3886	9.32918
NKAIN1	ENSG00000084628	0.869974	1.62021	0.696178	0.057001	0.878996	1	3.71986	1.63392	2.00436	2.17543	1.21941	1.38096
AL139289.2	ENSG00000234694	0.211453	-2.58761	-1.37162	0.0570801	0.878996	1	0.240563	0.269072	0.128245	0.619943	0.427304	0.779341
RNVU1-8	ENSG00000286172	11.1202	-1.95856	-0.969797	0.0569686	0.878996	1	18.4198	16.3981	10.5211	9.08206	58.7599	25.5745
PMF1	ENSG00000160783	14.7378	1.30091	0.379519	0.0573132	0.878996	1	45.7685	35.3595	39.9463	42.1369	25.0505	33.1369
F11R	ENSG00000158769	0.978117	1.46797	0.553822	0.0566724	0.878996	1	3.14191	2.31062	2.60458	2.71245	1.59985	1.60824
STK32B	ENSG00000152953	0.731117	1.63649	0.710601	0.0563842	0.878996	1	2.36822	1.87722	1.78143	1.02795	1.31011	1.57996
LINC01612	ENSG00000250266	0.0314836	5.24347	2.39052	0.0564426	0.878996	1	0	0.122042	0.116336	0	0.0215346	0.0235656
PCDHA11	ENSG00000249158	0.0193288	2.57741	1.36592	0.0569554	0.878996	1	0.0253043	0.106136	0.0202348	0.0326052	0.0149824	0.0163954
DSP	ENSG00000096696	0.149381	-1.89618	-0.923093	0.0572672	0.878996	1	0.116052	0.115054	0.362771	1.02976	0.196769	0.0820294
SEM1	ENSG00000127922	3.79416	1.3694	0.453542	0.0568827	0.878996	1	12.5613	8.20399	10.5649	10.1465	6.94034	7.46937
DUSP8	ENSG00000184545	0.631268	-2.24662	-1.16775	0.0573918	0.878996	1	0.438138	0.367546	1.43562	0.433742	0.635888	4.39327
LLPH	ENSG00000139233	3.8166	1.31687	0.397115	0.0572744	0.878996	1	9.97605	10.5041	10.486	9.89773	9.42675	6.33676
ZNF219	ENSG00000165804	6.30941	-1.35665	-0.440044	0.0572415	0.878996	1	14.8805	10.4361	12.4306	15.8639	14.1214	24.3822
AL627171.1	ENSG00000278002	0.62413	-1.9892	-0.992185	0.0570226	0.878996	1	0.729413	0.747867	1.00454	1.17484	1.54756	2.63874
GOLGA8N	ENSG00000232653	0.159087	-1.83819	-0.878283	0.0570066	0.878996	1	0.216144	0.245658	0.217445	0.411022	0.625434	0.318492
IQCH-AS1	ENSG00000259673	0.557349	-1.58051	-0.660393	0.0571005	0.878996	1	0.793638	1.02752	0.950125	1.39207	1.72751	1.65413
Z84723.1	ENSG00000260803	0.281002	3.09913	1.63186	0.0573485	0.878996	1	1.64566	0	0.822479	0.39759	0	0.399853
ATP6V0C	ENSG00000185883	51.0188	1.32357	0.404438	0.0567016	0.878996	1	175.295	116.467	130.867	158.443	91.4898	93.0607
CAVIN1	ENSG00000177469	0.235899	1.8369	0.877275	0.0568412	0.878996	1	1.33623	0.311373	0.41554	0.45914	0.303282	0.375175
EIF4A3	ENSG00000141543	13.4322	1.31449	0.394508	0.0573053	0.878996	1	48.2263	31.2326	32.2435	38.3905	28.253	24.0817
LSM4	ENSG00000130520	20.7895	1.32298	0.403792	0.056505	0.878996	1	70.3803	48.501	53.1178	59.1709	37.7655	42.3986
SELENOV	ENSG00000186838	0.298829	-2.00766	-1.00551	0.0566473	0.878996	1	0.489927	0.308243	0.391774	0.79897	0.815853	0.952318
GRAMD4	ENSG00000075240	5.70739	1.35586	0.43921	0.0572355	0.878996	1	19.8887	11.9484	15.4977	17.5167	10.9594	9.03946
INO80B-WBP1	ENSG00000274049	2.54374	1.55812	0.639808	0.0575556	0.879729	1	9.22373	5.81957	6.12922	4.16813	6.8766	3.33329
PGAP1	ENSG00000197121	5.93062	-1.28609	-0.36299	0.057892	0.879729	1	13.8979	13.2511	9.70197	16.1243	19.2305	15.4168
SP110	ENSG00000135899	0.765905	-1.48169	-0.567241	0.0577863	0.879729	1	1.87618	1.4314	0.895242	2.41005	2.11202	2.06358
ATG16L1	ENSG00000085978	3.71833	1.30505	0.38411	0.0579026	0.879729	1	12.7799	7.65456	10.3667	9.78375	7.62911	7.80341
LINC01952	ENSG00000234183	0.786346	-2.54831	-1.34954	0.0575016	0.879729	1	0.878519	0.491316	1.05377	1.2735	2.86089	2.56149
LANCL2	ENSG00000132434	2.81008	1.37537	0.45982	0.0577838	0.879729	1	10.0136	5.41893	7.91836	8.13107	4.10948	5.90423
PI15	ENSG00000137558	0.0153803	-3.56313	-1.83315	0.057931	0.879729	1	0	0.0186328	0.0118411	0.00715503	0.0789072	0.0431745
RBM26-AS1	ENSG00000227354	0.259286	-1.55204	-0.634166	0.057657	0.879729	1	0.510257	0.375363	0.451974	0.531042	0.78086	0.907911
GAS6-AS1	ENSG00000233695	0.106473	-1.94944	-0.963061	0.0579151	0.879729	1	0.258772	0.0558205	0.141895	0.300092	0.210126	0.409586
GTF3C1	ENSG00000077235	13.3992	1.30752	0.386828	0.05775	0.879729	1	50.9227	31.1079	29.9834	37.5377	23.7165	29.4909
OCEL1	ENSG00000099330	0.883931	-1.58391	-0.663487	0.057849	0.879729	1	1.82576	1.22049	1.43717	3.03257	2.25492	2.32896
LOX	ENSG00000113083	1.69738	1.39573	0.481017	0.0580364	0.880235	1	7.46279	2.71738	4.21788	4.81109	3.19093	2.82322
EXTL3-AS1	ENSG00000246339	0.378045	-1.70659	-0.771116	0.0581158	0.880235	1	0.689928	0.679823	0.411591	0.931324	1.14769	1.16014
PGAM1	ENSG00000171314	78.4098	1.4687	0.554543	0.0581199	0.880235	1	318.379	157.865	183.441	229.696	131.272	115.421
ALDH3A2	ENSG00000072210	4.90601	1.27794	0.353826	0.0581767	0.880235	1	16.9754	10.9108	12.7783	13.2776	8.78793	11.8613
BCAM	ENSG00000187244	0.742123	-1.57017	-0.650917	0.0581877	0.880235	1	1.01585	1.61559	1.06619	2.93491	1.73863	1.73806
LMOD1	ENSG00000163431	0.661348	-1.8767	-0.908196	0.058545	0.880839	1	0.587894	0.784595	1.37829	1.44617	1.51892	2.72701
PLXND1	ENSG00000004399	2.58453	1.58061	0.66048	0.0588054	0.880839	1	12.5516	3.51128	6.10662	6.95385	3.74645	3.88818
CCNG2	ENSG00000138764	5.60035	-1.32711	-0.408284	0.0588986	0.880839	1	10.2634	12.2552	10.7677	19.2362	13.9459	15.0945
AL513548.1	ENSG00000261584	0.084704	-3.06489	-1.61584	0.0588229	0.880839	1	0.122979	0.0773737	0.0245853	0.207981	0.136528	0.38845
COX7A2	ENSG00000112695	30.2141	1.29156	0.369109	0.0587273	0.880839	1	103.94	67.1357	79.235	86.1087	63.0194	58.3759
SSNA1	ENSG00000176101	10.7435	1.32103	0.401658	0.0587071	0.880839	1	31.3947	28.3126	28.1481	29.2452	25.5491	17.2595
R3HDM2	ENSG00000179912	23.7356	-1.33407	-0.41584	0.0585013	0.880839	1	39.7328	57.3898	43.0241	53.3922	73.3275	76.4731
AC063943.1	ENSG00000278344	0.542039	2.24357	1.1658	0.0585421	0.880839	1	1.93554	1.49879	1.07153	0.431653	0.925626	0.723517
RB1-DT	ENSG00000231473	0.301918	-2.0623	-1.04425	0.0583267	0.880839	1	0.289323	0.509687	0.34704	0.559201	0.873657	1.15289
PYGL	ENSG00000100504	2.91926	1.28807	0.36521	0.0589879	0.880839	1	7.46206	7.82474	8.36327	6.7268	6.24418	6.9804
AC092134.3	ENSG00000285538	0.373162	-2.25795	-1.17502	0.0586249	0.880839	1	0.387598	0.609654	0.309946	0.655502	0.946658	1.601
RCVRN	ENSG00000109047	0.349621	2.49789	1.32071	0.0589593	0.880839	1	0.659715	1.00308	1.12104	0.259003	0.640846	0.320588
RAB5C	ENSG00000108774	15.1181	1.3182	0.398573	0.0585675	0.880839	1	56.4019	31.1458	38.6087	42.7444	24.9099	33.9574
TEX14	ENSG00000121101	1.99631	-1.62504	-0.700472	0.0584588	0.880839	1	2.85674	3.75753	3.2157	3.46295	4.32292	9.39352
DSC2	ENSG00000134755	0.527999	1.37216	0.456449	0.0588385	0.880839	1	0.953995	1.44764	1.79359	0.856377	1.2615	1.24861
UBL5	ENSG00000198258	13.8186	1.4574	0.543402	0.0586224	0.880839	1	55.145	25.8127	35.0978	36.1823	24.5247	23.5296
AC022098.1	ENSG00000267169	0.172256	-1.916	-0.938097	0.0588875	0.880839	1	0.32932	0.234821	0.171173	0.350078	0.3656	0.768156
LURAP1L	ENSG00000153714	0.0437284	-3.18592	-1.67171	0.0591324	0.882327	1	0.0519307	0.0145213	0.0415269	0.0669142	0.138365	0.168238
SMOC1	ENSG00000198732	2.51195	-1.33226	-0.413874	0.0592466	0.882694	1	5.09537	5.73993	4.08426	7.76139	8.03793	5.73038
ALPK3	ENSG00000136383	0.0895782	-2.25005	-1.16996	0.0592135	0.882694	1	0.0339148	0.13006	0.135601	0.482262	0.116181	0.183644
GTF2E1	ENSG00000153767	5.52823	1.33707	0.419077	0.0593566	0.883428	1	16.0427	11.7164	17.4194	14.3941	9.33113	12.8251
RN7SL494P	ENSG00000241175	0.247866	-3.92905	-1.97418	0.0593856	0.883428	1	0	0.146263	0.278849	1.17947	0.464553	0.508366
FBLIM1	ENSG00000162458	0.0574943	-2.02172	-1.01559	0.0599678	0.88399	1	0.0609101	0.0919735	0.0681902	0.200135	0.108193	0.189435
TSGA10	ENSG00000135951	0.121291	-1.74494	-0.803175	0.0597996	0.88399	1	0.229983	0.1869	0.143678	0.194473	0.446811	0.39116
GCC2-AS1	ENSG00000214184	0.911317	-1.86822	-0.901664	0.059938	0.88399	1	1.45943	0.946045	1.48534	1.98737	2.29776	3.54605
TRPC3	ENSG00000138741	0.00563904	-6.65955	-2.73543	0.059571	0.88399	1	0	0	0.00460207	0.0222466	0.020445	0.00559332
FHDC1	ENSG00000137460	0.155564	-1.86899	-0.902257	0.0598616	0.88399	1	0.249222	0.209068	0.212151	0.240848	0.449827	0.640707
FRG1-DT	ENSG00000245685	0.166168	-1.81624	-0.860953	0.0600966	0.88399	1	0.370521	0.220848	0.163739	0.376916	0.389691	0.663357
PPIL1	ENSG00000137168	30.4214	1.29123	0.368745	0.0598538	0.88399	1	77.3545	91.8943	77.1414	77.3339	65.4128	65.163
AC078846.1	ENSG00000273329	1.85326	-1.45653	-0.542536	0.0596191	0.88399	1	4.43758	3.57194	2.30985	4.44756	5.9616	5.44745
AC083862.3	ENSG00000287733	0.356652	-2.26203	-1.17762	0.0597668	0.88399	1	0.352353	0.54894	0.322014	1.07018	1.43057	0.538137
OR9A2	ENSG00000179468	0.175887	-3.963	-1.98659	0.0600635	0.88399	1	0.357445	0	0.0408334	0.19739	0.0907027	1.24071
PLAG1	ENSG00000181690	0.0776038	-1.57437	-0.654775	0.0600422	0.88399	1	0.142193	0.113603	0.135364	0.20285	0.306695	0.151358
AF117829.1	ENSG00000251136	0.19889	-1.60304	-0.680815	0.0598992	0.88399	1	0.423237	0.284037	0.311958	0.426798	0.326862	0.965761
MYPN	ENSG00000138347	1.0543	-1.74284	-0.801439	0.0596744	0.88399	1	0.900917	1.9083	1.83709	5.06424	1.69362	2.4152
AC079322.1	ENSG00000261187	0.297472	-2.20562	-1.14118	0.0595326	0.88399	1	0.420296	0.43093	0.224062	0.722084	0.746559	1.08929
ATP5PD	ENSG00000167863	35.3382	1.32531	0.406335	0.0597862	0.88399	1	104.778	86.8777	97.6261	91.3323	70.1094	74.2981
AGO1	ENSG00000092847	4.53343	1.27208	0.347191	0.0625774	0.885628	1	14.7831	12.0172	10.5917	12.7154	10.4757	8.38547
AL355488.1	ENSG00000273373	1.13982	-1.89092	-0.919091	0.0615462	0.885628	1	2.90127	1.77856	0.475903	2.31851	1.60219	5.94675
TMEM178A	ENSG00000152154	0.274281	-1.8308	-0.872471	0.0621152	0.885628	1	0.257301	0.647535	0.257191	0.559473	1.08546	0.687693
AC079807.1	ENSG00000233230	0.920738	-2.05605	-1.03987	0.0611743	0.885628	1	1.05265	1.92193	0.544668	2.03455	3.5196	2.28686
OSBPL10	ENSG00000144645	0.284555	1.51628	0.600536	0.0616459	0.885628	1	0.880989	1.02216	0.434611	0.635361	0.599479	0.421726
AC072028.1	ENSG00000287045	0.0403233	-2.39602	-1.26064	0.0606357	0.885628	1	0.0543213	0.0569614	0.0217192	0.118116	0.072367	0.158384
IL12A-AS1	ENSG00000244040	0.00447994	-6.71409	-2.74719	0.0614411	0.885628	1	0.00454658	0	0	0.0307565	0	0.00883761
LINC01968	ENSG00000237222	0.0216872	-2.32215	-1.21546	0.0621875	0.885628	1	0.0261955	0.0219749	0.025137	0.0556935	0.0977136	0.0305512
FAM200B	ENSG00000237765	6.86673	-1.30317	-0.382031	0.0627206	0.885628	1	16.9784	14.5844	10.9636	17.0034	20.3466	21.5169
HHIP	ENSG00000164161	0.0272761	-1.98185	-0.986846	0.062995	0.885628	1	0.0399561	0.0372427	0.0319512	0.0514845	0.0867446	0.0949257
RAD1	ENSG00000113456	5.41881	1.28067	0.356894	0.0611761	0.885628	1	14.9852	14.3375	14.8129	14.4665	12.6205	10.3485
TMEM232	ENSG00000186952	0.0562662	-1.89976	-0.925816	0.0629897	0.885628	1	0.0469016	0.126778	0.0541743	0.176266	0.212903	0.091167
AC113410.4	ENSG00000286408	0.496917	-1.90302	-0.928287	0.0619659	0.885628	1	0.575435	0.697266	0.76692	1.23577	1.64676	1.36709
LINC00951	ENSG00000204092	0.336173	-2.41035	-1.26924	0.0615657	0.885628	1	0.287025	0.561821	0.229522	0.83214	0.849724	1.20882
LCA5	ENSG00000135338	0.939053	-1.65725	-0.728793	0.0619358	0.885628	1	1.28866	1.44635	1.663	1.62326	4.57802	1.72751
AC018647.2	ENSG00000271122	4.91809	-1.46584	-0.551728	0.0604719	0.885628	1	7.0041	13.1804	6.12566	11.4032	15.8037	14.8656
AC004837.4	ENSG00000287584	1.05867	-1.83629	-0.876793	0.0612457	0.885628	1	2.20264	1.61187	0.861943	2.76268	4.24546	2.0041
MAGI2	ENSG00000187391	0.132684	-1.51991	-0.60399	0.0627928	0.885628	1	0.231297	0.293859	0.170216	0.302892	0.403404	0.430047
SRI	ENSG00000075142	14.5649	1.29288	0.370584	0.0625651	0.885628	1	48.1001	32.5321	39.6141	41.6843	26.976	31.1737
SMO	ENSG00000128602	4.19377	1.36124	0.444924	0.0619861	0.885628	1	16.4814	9.45447	9.23549	12.617	8.65184	6.18173
TAS2R3	ENSG00000127362	0.398156	-2.22631	-1.15465	0.0625151	0.885628	1	0.625842	0.686548	0.153988	0.604811	0.855126	1.96513
AC108925.1	ENSG00000286010	0.0769841	-2.1578	-1.10956	0.0604361	0.885628	1	0.115201	0.0676481	0.101334	0.333989	0.133008	0.201534
B4GALT1	ENSG00000086062	24.3088	1.30405	0.382998	0.0629853	0.885628	1	60.4338	59.6514	76.4852	58.2567	42.1953	63.6021
ZNF37A	ENSG00000075407	5.00166	-1.2889	-0.36614	0.0623257	0.885628	1	11.9832	11.4144	7.82469	11.2581	15.7035	15.841
ZMIZ1-AS1	ENSG00000224596	0.0113543	-4.32308	-2.11206	0.060986	0.885628	1	0	0.00869799	0.0082913	0.0400805	0.027626	0.0302315
IFITM1	ENSG00000185885	0.079222	3.08537	1.62544	0.0623628	0.885628	1	0.283141	0.285026	0.0905665	0.164176	0.0502935	0
TALDO1	ENSG00000177156	23.0223	1.31687	0.39711	0.0622964	0.885628	1	74.6286	50.3529	64.7951	65.3369	41.8118	47.8462
CSNK2A3	ENSG00000254598	0.232021	-2.26116	-1.17706	0.062728	0.885628	1	0.283444	0.237776	0.291418	0.547838	0.395586	1.06256
BDNF-AS	ENSG00000245573	0.275655	-1.59312	-0.671851	0.062373	0.885628	1	0.396858	0.594239	0.375361	0.672194	0.788305	0.904126
MALAT1	ENSG00000251562	369.078	-1.3763	-0.460798	0.0608833	0.885628	1	961.642	643.141	582.758	740.93	1160.74	1254.85
AP003499.3	ENSG00000275146	8.7205	-3.31256	-1.72795	0.0621663	0.885628	1	0.66255	6.66962	12.1857	0	40.6019	32.8405
GRIK4	ENSG00000149403	0.0524655	1.8789	0.909886	0.061696	0.885628	1	0.225609	0.0887153	0.12967	0.109014	0.0500928	0.0890779
MAP3K12	ENSG00000139625	0.919272	-1.69086	-0.757753	0.0618884	0.885628	1	1.54936	1.57864	1.26554	2.39053	1.67133	3.8841
AC083805.1	ENSG00000245651	0.065193	-2.10104	-1.0711	0.0606739	0.885628	1	0.0542795	0.113835	0.0723419	0.174852	0.249073	0.131885
CCDC60	ENSG00000183273	0.0151182	-23.5519	-4.55777	0.0609258	0.885628	1	0	0	0	0.0447622	0.0685621	0.0150057
AL161772.1	ENSG00000278291	7.14887	1.37497	0.459397	0.0624823	0.885628	1	16.0141	18.4024	23.0274	21.7685	11.2992	13.1705
AL353648.1	ENSG00000285840	0.151184	-2.50092	-1.32246	0.0605819	0.885628	1	0.326513	0.060868	0.116044	0.175301	0.579976	0.528896
AC001226.2	ENSG00000283208	0.0170382	-2.86592	-1.519	0.0602988	0.885628	1	0.0172511	0.0217075	0.00689749	0.0416785	0.0459639	0.058682
AHSA1	ENSG00000100591	16.4185	1.31494	0.394999	0.0620544	0.885628	1	60.9078	39.2686	36.7702	43.2541	37.1609	30.1842
LINC02352	ENSG00000259448	0.381879	-2.03451	-1.02468	0.0624702	0.885628	1	1.05	0.281864	0.285478	1.27854	0.354366	1.69402
FAM214A	ENSG00000047346	1.28267	-1.42865	-0.514651	0.0616522	0.885628	1	2.10787	2.41043	2.53483	2.68305	4.69215	3.5576
COMMD4	ENSG00000140365	2.04824	1.46139	0.547344	0.0608228	0.885628	1	7.96255	4.2057	4.99061	6.33931	2.93775	3.23805
C15orf40	ENSG00000169609	1.29324	-1.30395	-0.382887	0.0612183	0.885628	1	3.31394	2.39931	2.31763	3.33157	3.55287	4.22152
IFT140	ENSG00000187535	1.49019	-1.33207	-0.413668	0.0608369	0.885628	1	3.91173	2.17672	2.95601	5.2924	3.73471	3.82081
C16orf86	ENSG00000159761	0.117419	-2.22885	-1.1563	0.0629958	0.885628	1	0.148056	0.149042	0.118394	0.314777	0.184091	0.518022
NRN1L	ENSG00000188038	0.163365	2.74427	1.45642	0.060462	0.885628	1	0.602318	0.321538	0.437863	0	0.145893	0.372522
DUS2	ENSG00000167264	4.52583	1.34759	0.430377	0.0618362	0.885628	1	13.178	10.7033	13.1165	12.2935	8.1521	9.30344
AC010761.2	ENSG00000265073	0.229069	-2.62117	-1.39021	0.0622049	0.885628	1	0.351485	0.176913	0.168641	0.611413	1.18623	0.136643
RHBDL3	ENSG00000141314	1.76756	1.47832	0.563961	0.0626014	0.885628	1	7.19511	3.31972	4.35948	4.86733	2.26935	3.48749
KIF18B	ENSG00000186185	14.0428	1.28567	0.362517	0.0629947	0.885628	1	49.6666	31.1824	35.7717	34.9775	33.3525	28.209
NME1-NME2	ENSG00000011052	69.434	1.3125	0.392318	0.0606642	0.885628	1	198.562	176.853	191.467	190.073	178.209	101.493
NARF	ENSG00000141562	2.08237	1.42098	0.506886	0.0623915	0.885628	1	8.33312	3.23416	5.92503	6.40366	3.06143	3.61037
SCAMP4	ENSG00000227500	3.05156	1.30196	0.380683	0.0606907	0.885628	1	10.866	6.69415	7.79711	9.07613	6.15193	5.59494
PEPD	ENSG00000124299	2.61757	1.47369	0.559435	0.0611657	0.885628	1	9.92123	4.55864	7.39396	7.71146	3.554	4.56807
HRC	ENSG00000130528	0.290109	-2.31029	-1.20807	0.0614566	0.885628	1	0.319181	0.200816	0.462615	1.71578	0.301193	0.523481
FAM182B	ENSG00000175170	0.0432435	-2.18942	-1.13055	0.0627924	0.885628	1	0.0697829	0.065044	0.0248011	0.157355	0.117067	0.0979648
CEBPB	ENSG00000172216	19.2371	-1.88008	-0.910791	0.0627135	0.885628	1	14.7281	32.2298	32.8433	11.5035	63.7902	88.4905
MIR1-1HG-AS1	ENSG00000174403	0.0700276	-2.67062	-1.41717	0.0612355	0.885628	1	0.0312063	0.0785354	0.0873405	0.39205	0.0692887	0.151647
AC004832.4	ENSG00000272689	0.52593	-2.44351	-1.28895	0.0606191	0.885628	1	0.800664	0.537331	0.384155	2.47603	0.853318	1.24506
AL732509.1	ENSG00000286724	0.0189722	-3.26606	-1.70755	0.0628073	0.885628	1	0.0201536	0.00845325	0.016116	0.0194764	0.0268487	0.117523
ATP2B3	ENSG00000067842	1.72439	1.44169	0.527757	0.0612488	0.885628	1	5.90262	2.85057	5.52458	4.97679	2.67427	3.0017
MT-CO3	ENSG00000198938	11138.2	1.28076	0.357003	0.0626805	0.885628	1	29280.6	31136	29989.5	26210.5	25744.7	24660.2
SELENON	ENSG00000162430	28.0727	1.30119	0.37983	0.0646307	0.885636	1	87.6766	70.875	72.1822	64.1878	60.3314	65.4388
SYTL1	ENSG00000142765	0.712937	-1.56366	-0.644931	0.0634685	0.885636	1	1.01566	1.52885	1.04748	1.56861	2.20873	2.32479
PTPRU	ENSG00000060656	5.18534	1.3434	0.42589	0.0649951	0.885636	1	17.2529	10.0081	15.5725	15.5769	9.50371	9.26674
PSMB2	ENSG00000126067	17.6258	1.39883	0.484222	0.0660296	0.885636	1	65.2717	35.4201	46.2885	45.8268	28.2261	37.5095
LURAP1	ENSG00000171357	0.0752329	-2.58729	-1.37144	0.0642155	0.885636	1	0.171998	0.0721429	0	0.138515	0.305515	0.195025
AL049597.2	ENSG00000261737	0.217557	-2.51264	-1.32921	0.0664593	0.885636	1	0.055155	0.416417	0.176421	0.31981	0.832747	0.696865
SLC16A1-AS1	ENSG00000226419	0.989378	-1.45708	-0.54308	0.0650152	0.885636	1	2.72609	1.44157	1.48115	2.5375	1.72302	4.29524
U1_12	ENSG00000206828	26.7197	-1.79976	-0.847805	0.0661919	0.885636	1	55.5895	31.4502	33.0811	29.0471	132.326	63.7648
SF3B4	ENSG00000143368	34.4154	1.26974	0.344531	0.0632475	0.885636	1	110.736	94.0687	78.7507	93.6981	77.3804	68.7161
AC242988.1	ENSG00000276110	0.286192	-2.48136	-1.31113	0.06625	0.885636	1	0.222706	0.124549	0.534266	0.573925	0.593379	1.29868
AL358472.7	ENSG00000285779	7.64336	-1.33782	-0.419881	0.0659907	0.885636	1	19.6677	8.95992	17.5147	20.4391	23.5896	21.4701
AL358472.3	ENSG00000273026	0.606247	-2.40146	-1.26391	0.0663257	0.885636	1	1.14948	0.642854	0.306398	1.23429	0.907464	3.10328
SOAT1	ENSG00000057252	7.91958	1.33349	0.415202	0.0634314	0.885636	1	25.4162	17.5952	22.2181	21.3447	18.0302	13.3254
AL353708.3	ENSG00000272906	1.16688	-1.82533	-0.868154	0.0655612	0.885636	1	1.60781	1.93322	1.49998	1.70915	4.90262	3.28151
AL645504.1	ENSG00000235121	0.0773219	-3.33084	-1.73589	0.0655998	0.885636	1	0.0586003	0.0245794	0.0937205	0.311471	0.0780675	0.284767
ZNF496	ENSG00000162714	10.5517	-1.41341	-0.499181	0.0657678	0.885636	1	15.1799	27.1193	15.902	21.9075	39.6275	28.3376
LAPTM4A-DT	ENSG00000223734	0.435415	-2.02148	-1.01541	0.0644268	0.885636	1	0.555015	0.543191	0.591764	1.25152	1.31448	1.16874
CLIP4	ENSG00000115295	6.17442	-1.29682	-0.374974	0.063082	0.885636	1	13.7329	12.6975	11.7007	19.4661	14.4352	19.3452
ACTG2	ENSG00000163017	0.0829241	-2.48222	-1.31163	0.065391	0.885636	1	0.0834489	0.0933384	0.0889742	0.0806447	0.185285	0.446071
AC092683.1	ENSG00000230606	2.36807	-1.46311	-0.549036	0.0651995	0.885636	1	6.33777	2.48639	4.62681	5.50775	4.05358	10.9097
ZC3H6	ENSG00000188177	3.86197	-1.49431	-0.579483	0.065479	0.885636	1	9.29816	4.33337	7.65805	10.1577	6.26333	17.0085
PHOSPHO2	ENSG00000144362	2.72518	-1.49459	-0.579754	0.0651751	0.885636	1	6.37615	4.57191	3.87391	7.71096	6.42215	9.34738
AC079305.3	ENSG00000229337	1.31363	-1.61236	-0.689177	0.0662068	0.885636	1	2.29514	2.2051	1.97651	2.67299	4.93047	3.58428
COL5A2	ENSG00000204262	0.403841	-1.63954	-0.713288	0.0649628	0.885636	1	0.782133	0.747245	0.445915	1.0148	1.44717	0.985383
FARP2	ENSG00000006607	5.16501	1.41325	0.499012	0.0653394	0.885636	1	19.2195	9.91013	13.9593	16.3923	8.17281	8.0833
MYRIP	ENSG00000170011	0.0766586	1.5821	0.661845	0.0646713	0.885636	1	0.252916	0.250054	0.130016	0.157125	0.144401	0.122904
LPP	ENSG00000145012	1.13531	-1.30668	-0.38591	0.0653945	0.885636	1	3.16135	2.06518	1.90555	2.91068	2.49431	4.3818
KIT	ENSG00000157404	0.400993	1.71488	0.778111	0.0645309	0.885636	1	2.15332	0.90319	0.42667	1.04969	0.660044	0.379668
PPEF2	ENSG00000156194	0.144827	2.1277	1.0893	0.0644034	0.885636	1	0.159683	0.348283	0.621432	0.205755	0.226912	0.165541
PTGER4	ENSG00000171522	0.31508	-1.73109	-0.791681	0.0653137	0.885636	1	0.553371	0.414028	0.478387	0.549229	1.44784	0.668641
AC063979.2	ENSG00000251613	0.0701011	-3.50595	-1.8098	0.0651379	0.885636	1	0.0450906	0.0945642	0.0180285	0.0871507	0.0400465	0.482058
ANKRA2	ENSG00000164331	1.89045	-1.41096	-0.496679	0.0653741	0.885636	1	3.6351	2.9217	4.04827	4.359	6.82879	4.93873
GPRIN1	ENSG00000169258	0.825515	1.54815	0.630543	0.0644557	0.885636	1	3.78063	1.50174	1.75186	2.3712	1.23413	1.15585
Z98745.2	ENSG00000287804	0.892755	-1.88397	-0.913778	0.0651965	0.885636	1	1.87957	1.21634	0.772981	2.23159	3.14785	2.2443
ATP6V1G2-DDX39B	ENSG00000254870	8.77299	-1.50538	-0.590128	0.0659402	0.885636	1	16.7369	17.0583	13.0264	22.5018	21.8901	31.0781
Z97989.1	ENSG00000255389	0.521858	-1.80103	-0.84882	0.06544	0.885636	1	0.89763	0.64281	0.77032	1.29062	1.8861	1.27669
NUDT1	ENSG00000106268	6.52721	1.56445	0.64566	0.0638311	0.885636	1	25.2484	13.4688	15.9374	19.75	9.91875	7.70378
AP002851.1	ENSG00000283959	0.0879953	-2.66439	-1.41381	0.0645728	0.885636	1	0.0746535	0.0835007	0.0994955	0.264531	0.0442016	0.459518
DNAJB5	ENSG00000137094	0.584945	-1.67572	-0.744781	0.0658037	0.885636	1	1.27764	0.535894	1.06484	1.33035	1.03882	2.68459
AL359644.1	ENSG00000227355	0.236114	-1.98315	-0.987794	0.0654987	0.885636	1	0.261964	0.439513	0.232757	0.618837	0.672127	0.735516
GBGT1	ENSG00000148288	0.0957505	-2.19686	-1.13544	0.0665486	0.885636	1	0.131851	0.15485	0.0632613	0.242098	0.187362	0.397251
SAR1A	ENSG00000079332	16.485	1.2733	0.348571	0.0632766	0.885636	1	57.8567	37.808	41.1468	45.9924	34.5809	34.0946
CDHR1	ENSG00000148600	9.85678	1.31603	0.396196	0.0649615	0.885636	1	25.3945	34.736	19.7804	24.8725	21.3112	19.9086
FAS	ENSG00000026103	1.9093	-1.49882	-0.583829	0.0661129	0.885636	1	3.2783	3.10882	3.73092	4.63742	5.45182	6.28923
NKX2-3	ENSG00000119919	0.121831	2.12987	1.09076	0.0649709	0.885636	1	0.431546	0.255541	0.32479	0.24532	0.112727	0.14803
POLL	ENSG00000166169	4.4258	-1.39635	-0.481665	0.0655281	0.885636	1	6.73796	11.5016	6.60801	9.30895	15.2776	13.1923
KCNIP2-AS1	ENSG00000226009	0.527624	-1.89728	-0.923932	0.0648013	0.885636	1	0.987919	0.504455	0.75565	0.747173	1.9074	1.83682
DNHD1	ENSG00000179532	1.08619	-1.50166	-0.586554	0.0643904	0.885636	1	1.27994	2.43738	1.83541	2.92269	4.36956	1.95518
TMEM86A	ENSG00000151117	0.119182	-1.92346	-0.943701	0.0658571	0.885636	1	0.112429	0.17815	0.189799	0.543254	0.155325	0.339949
AC068205.2	ENSG00000283341	0.583862	-1.60202	-0.679896	0.0632976	0.885636	1	1.3788	0.852269	0.742784	1.4026	1.76595	1.83376
GAL	ENSG00000069482	11.1221	1.47255	0.558318	0.0635585	0.885636	1	40.0384	22.5057	29.963	28.4878	18.3953	20.1303
AP003717.4	ENSG00000287425	0.254364	-2.16795	-1.11633	0.0633614	0.885636	1	0.426238	0.336531	0.180447	0.484606	1.18021	0.487365
DRD2	ENSG00000149295	0.245454	1.90041	0.926311	0.0657786	0.885636	1	0.939833	0.702008	0.411806	0.373254	0.274421	0.487992
IL23A	ENSG00000110944	0.0864603	2.89357	1.53285	0.0649754	0.885636	1	0.269969	0.188727	0.251864	0	0.159846	0.0874608
AC025165.3	ENSG00000257921	0.229752	-2.96159	-1.56637	0.0655262	0.885636	1	0.35842	0.0707464	0.202316	1.77263	0.131075	0.122946
CSRP2	ENSG00000175183	4.95216	1.56237	0.643737	0.0662429	0.885636	1	14.9159	9.727	15.9398	12.0122	6.39804	9.67329
RNU6-36P	ENSG00000206899	0.591256	-28.016	-4.80818	0.0654887	0.885636	1	0	0	0	0	4.39951	0.481443
SETDB2	ENSG00000136169	3.17249	-1.36909	-0.453215	0.0636147	0.885636	1	8.27046	5.08694	5.64246	9.29651	5.78036	12.3656
CDH24	ENSG00000139880	1.56579	1.42054	0.50644	0.0641475	0.885636	1	6.81641	3.03704	3.41523	3.90868	3.00183	2.85886
HSP90AA1	ENSG00000080824	155.891	1.6863	0.753858	0.066376	0.885636	1	667.711	311.842	339.226	389.09	266.867	169.581
AC036103.1	ENSG00000261002	0.228918	-2.73053	-1.44918	0.0665121	0.885636	1	0.429182	0.135012	0.1287	0.155535	1.09587	0.677821
SERF2	ENSG00000140264	14.4653	1.32941	0.410783	0.0654272	0.885636	1	49.4112	35.4466	34.9142	39.7122	35.8555	21.112
ZSCAN32	ENSG00000140987	2.23176	1.37007	0.454245	0.0639468	0.885636	1	7.53622	5.01159	5.91198	6.67222	4.19383	3.62745
ABAT	ENSG00000183044	0.438109	-1.85923	-0.894705	0.0654793	0.885636	1	0.360163	0.631735	0.842204	1.58209	0.557355	1.67065
AC093512.2	ENSG00000285043	0.768613	1.74737	0.805183	0.0662968	0.885636	1	1.73061	2.0193	2.42812	0.760208	0.712618	2.33948
ZNF785	ENSG00000197162	0.0489755	-1.93637	-0.953357	0.0661218	0.885636	1	0.0321236	0.143722	0.0171253	0.0827844	0.256771	0.0728487
CFAP20	ENSG00000070761	17.4406	1.30333	0.382199	0.0657865	0.885636	1	53.7638	41.3929	48.0377	43.3236	43.4756	31.5531
CRISPLD2	ENSG00000103196	0.115806	-2.02905	-1.0208	0.0637729	0.885636	1	0.206371	0.0893526	0.165026	0.141535	0.508468	0.329972
AC068025.1	ENSG00000264808	0.466442	-2.01494	-1.01074	0.0663407	0.885636	1	0.973826	0.525167	0.389364	1.14277	1.05022	1.82531
ACACA	ENSG00000278540	12.7329	1.26919	0.343903	0.0636685	0.885636	1	41.3384	32.001	31.6407	33.4903	26.6607	28.475
ITGB3	ENSG00000259207	0.0236977	-2.86559	-1.51883	0.0660779	0.885636	1	0.0241256	0.0202386	0.0192923	0.116574	0.053567	0.0351714
AC011921.1	ENSG00000259349	0.832116	-1.72916	-0.790069	0.0643052	0.885636	1	1.49685	1.19129	1.16628	1.52074	3.10195	2.46195
EVPL	ENSG00000167880	0.0269191	2.52728	1.33758	0.0644575	0.885636	1	0.112925	0.0296033	0.0846573	0.0545649	0.0125365	0.0274378
STXBP2	ENSG00000076944	0.137736	-1.53808	-0.621131	0.0664479	0.885636	1	0.307346	0.162063	0.252794	0.492201	0.272965	0.426727
NDUFB7	ENSG00000099795	30.2528	1.35661	0.440003	0.0648446	0.885636	1	81.7351	80.4509	83.8195	76.4034	66.6965	54.2105
AC006213.3	ENSG00000267191	0.145802	-2.16128	-1.11189	0.0644548	0.885636	1	0.202637	0.218556	0.115743	0.307729	0.514197	0.422019
ZNF460	ENSG00000197714	14.9664	-1.29146	-0.369001	0.0663833	0.885636	1	34.5419	33.5285	24.4151	39.0982	50.4599	38.4204
RALY-AS1	ENSG00000285230	0.277237	-1.66058	-0.731688	0.0645538	0.885636	1	0.631746	0.359147	0.375754	0.549969	0.86248	0.959045
IKBKG	ENSG00000269335	1.07547	1.46517	0.551072	0.0633097	0.885636	1	3.93512	2.38133	2.64231	2.56912	1.72078	2.21881
RNU1-2	ENSG00000207005	79.8029	-1.47337	-0.559119	0.0679235	0.886192	1	102.453	168.909	147.831	226.442	273.55	182.499
AL031432.4	ENSG00000284602	1.04838	-1.65787	-0.72933	0.0695321	0.886192	1	1.62158	2.33487	1.04511	1.96471	4.14859	2.79919
AL606760.3	ENSG00000259818	0.100078	-2.04303	-1.03071	0.0690623	0.886192	1	0.132842	0.0866747	0.165244	0.199699	0.393272	0.258218
DNAJB4	ENSG00000162616	3.82002	-1.35339	-0.436574	0.0697627	0.886192	1	8.89127	6.77411	6.91534	7.99751	14.8396	9.67113
WDR63	ENSG00000162643	0.202681	-2.16778	-1.11622	0.0685526	0.886192	1	0.270222	0.238018	0.248498	0.326426	0.407989	1.01112
FAM102B	ENSG00000162636	1.32391	1.37017	0.454354	0.0707233	0.886192	1	5.2267	2.33972	3.5404	4.09235	2.86476	1.67491
HJV	ENSG00000168509	2.31861	-2.03496	-1.025	0.0714047	0.886192	1	0.811062	3.47548	4.25954	13.4942	2.35568	4.45265
AC239803.1	ENSG00000273059	0.406092	-2.44397	-1.28923	0.067074	0.886192	1	0.369795	0.517024	0.39428	1.19123	0.875809	1.43761
LINC02804	ENSG00000274372	0.238546	-1.96609	-0.975328	0.0681329	0.886192	1	0.285077	0.324555	0.341947	0.255819	1.03083	0.732245
IER5	ENSG00000162783	8.58294	-1.44407	-0.530138	0.0687775	0.886192	1	18.0171	14.8708	14.7102	15.2778	32.0704	25.7143
DTL	ENSG00000143476	19.8665	1.34605	0.428728	0.0713375	0.886192	1	64.2766	42.5493	56.9095	55.9466	35.3036	39.6796
RYR2	ENSG00000198626	0.773905	-1.48236	-0.567893	0.0713293	0.886192	1	1.5585	1.73324	0.897315	1.68974	2.52313	2.40333
RNASEH1	ENSG00000171865	11.3637	1.25551	0.328273	0.06726	0.886192	1	36.706	29.2214	27.7268	29.2862	25.0854	25.5276
LINC01460	ENSG00000205334	0.0653963	-2.64187	-1.40156	0.0699733	0.886192	1	0.0370657	0.0777344	0.0740998	0.0895504	0.148137	0.324217
TRABD2A	ENSG00000186854	0.00658703	-4.31237	-2.10848	0.0696836	0.886192	1	0.00604309	0	0.00483241	0.0408801	0.0107342	0.00587327
LIMS2	ENSG00000072163	0.0681983	-1.76449	-0.819255	0.068412	0.886192	1	0.099925	0.0943035	0.109871	0.313843	0.160854	0.115326
TMEM163	ENSG00000152128	0.00856847	-4.33667	-2.11659	0.067803	0.886192	1	0	0	0.0124589	0.04517	0	0.0302848
AC010894.2	ENSG00000226853	0.905424	-2.06242	-1.04434	0.0676503	0.886192	1	1.12633	0.833702	1.48348	1.85683	3.58945	2.25376
AC123023.1	ENSG00000236452	0.440631	2.24619	1.16748	0.0701805	0.886192	1	1.52804	1.36196	0.763696	0.369174	0.593735	0.74255
EXOSC7	ENSG00000075914	4.90577	1.30235	0.381123	0.068841	0.886192	1	16.3236	11.0834	13.1203	14.1907	10.2567	8.99089
ZBTB11	ENSG00000066422	3.82926	1.26176	0.335443	0.0691825	0.886192	1	11.4305	9.21686	10.715	9.51395	9.09057	8.18037
ITGB5	ENSG00000082781	3.30856	1.35337	0.436553	0.0697711	0.886192	1	9.29095	7.97829	9.70661	7.41414	6.68367	7.44053
MAP6D1	ENSG00000180834	1.07238	1.65926	0.730543	0.0702666	0.886192	1	3.94008	2.19735	2.79868	1.61667	3.04969	1.02687
CRMP1	ENSG00000072832	0.0368727	2.34914	1.23213	0.068858	0.886192	1	0.144943	0.106392	0.0579526	0.0700363	0.00804558	0.0616307
TIGD4	ENSG00000169989	2.60612	-1.73978	-0.798905	0.0689861	0.886192	1	3.76115	5.8179	2.50347	5.7778	4.20931	12.5511
AC008610.1	ENSG00000248367	0.383319	-2.30804	-1.20667	0.0713406	0.886192	1	0.404611	0.452561	0.431401	0.912366	1.4374	0.91756
AC008443.1	ENSG00000233937	1.54847	-1.56859	-0.649471	0.0699885	0.886192	1	4.01352	2.35147	1.83397	3.35534	3.62113	6.34643
SERPINB6	ENSG00000124570	0.0352794	-2.10106	-1.07112	0.0709894	0.886192	1	0.0240909	0.0437871	0.0610042	0.069844	0.0998479	0.132679
AMD1	ENSG00000123505	22.9585	1.28987	0.367227	0.0683811	0.886192	1	60.2528	70.0485	56.0367	60.4593	51.6422	45.2375
MIOS	ENSG00000164654	14.686	-1.26869	-0.343338	0.0695654	0.886192	1	31.0414	33.9276	26.7984	37.1316	49.0169	39.4376
PPIA	ENSG00000196262	166.106	1.32903	0.410371	0.0693697	0.886192	1	569.518	353.305	452.866	485.923	298.476	325.499
RHBDD2	ENSG00000005486	4.76861	1.35742	0.440866	0.0700093	0.886192	1	15.125	10.9207	13.1944	14.0166	7.89831	9.28984
ZNHIT1	ENSG00000106400	3.4137	1.35717	0.440597	0.0667448	0.886192	1	12.0007	6.81197	9.52037	10.5143	5.64371	6.23763
POLR2J	ENSG00000005075	13.1731	1.35518	0.438489	0.0696167	0.886192	1	42.4814	31.4694	34.5963	36.9712	27.9669	21.4042
AC073326.1	ENSG00000228540	0.261104	-2.43457	-1.28367	0.0709187	0.886192	1	0.380639	0.159656	0.304381	0.551772	0.760633	0.924855
AC021242.3	ENSG00000272267	0.404015	-2.06583	-1.04672	0.0684816	0.886192	1	0.731355	0.387487	0.461711	0.446386	1.88025	1.08491
TNFRSF10D	ENSG00000173530	0.057429	-2.82635	-1.49894	0.071226	0.886192	1	0.0299881	0.0880477	0.0359704	0.0289804	0.279652	0.174872
MCM4	ENSG00000104738	26.1669	1.44709	0.533154	0.0680339	0.886192	1	94.7352	55.1258	67.8964	77.1685	46.6899	37.4852
LAPTM4B	ENSG00000104341	81.0494	1.26963	0.34441	0.0672434	0.886192	1	267.391	177.481	224.202	225.768	166.256	173.219
AP005717.1	ENSG00000245330	0.101386	-2.76987	-1.46982	0.0675141	0.886192	1	0.163508	0.0457214	0.0871673	0.131678	0.435653	0.291341
NDUFB6	ENSG00000165264	13.7984	1.39118	0.476312	0.0707994	0.886192	1	49.8681	29.1936	35.749	35.9225	25.745	26.2404
AL138752.2	ENSG00000255872	1.16333	1.52116	0.605176	0.0711819	0.886192	1	4.80739	1.90487	3.09177	2.96543	2.34374	1.49115
LINC01410	ENSG00000238113	2.30848	-1.43655	-0.522605	0.0702199	0.886192	1	4.24238	5.14416	3.44385	4.26132	7.14741	8.33377
CPEB3	ENSG00000107864	0.623407	-1.45823	-0.544221	0.0689069	0.886192	1	1.33865	1.04436	1.0437	1.57181	2.07464	1.68484
NOLC1	ENSG00000166197	76.1949	1.28485	0.361599	0.0681119	0.886192	1	253.311	179.671	196.445	231.225	165.805	130.304
NFKB2	ENSG00000077150	3.77735	-1.46118	-0.547134	0.0678212	0.886192	1	5.45332	8.30047	6.61761	8.32344	10.4655	13.6162
AL157388.1	ENSG00000229272	0.991703	-1.78077	-0.8325	0.0693595	0.886192	1	0.682821	1.8473	1.80188	2.26007	1.65254	4.66201
TOLLIP-AS1	ENSG00000255153	0.630266	-2.04763	-1.03396	0.0672029	0.886192	1	0.508025	1.51528	0.361108	1.47286	2.15571	1.75555
LINC01616	ENSG00000261340	0.0858395	-3.92029	-1.97096	0.0701434	0.886192	1	0.0232474	0.117011	0.01859	0	0.619404	0.0903762
PHF21A	ENSG00000135365	3.72608	-1.33633	-0.418272	0.0697969	0.886192	1	8.30348	6.98551	7.10206	8.35861	11.1229	12.439
PLCB3	ENSG00000149782	5.77146	1.34172	0.424087	0.0701989	0.886192	1	21.8572	12.3611	14.0117	16.2006	10.8773	11.0937
NDUFS8	ENSG00000110717	6.51131	1.28989	0.367253	0.0686331	0.886192	1	19.6875	15.3162	18.3766	17.214	12.7704	14.6354
AP000787.1	ENSG00000245552	0.0577085	-2.02668	-1.01912	0.0691799	0.886192	1	0.0998595	0.0957375	0.0342229	0.0758244	0.259731	0.152512
MLF2	ENSG00000089693	26.7826	1.25946	0.332802	0.068795	0.886192	1	85.7933	66.7256	68.0561	70.1757	55.4164	62.1688
TPI1	ENSG00000111669	80.0116	1.3961	0.481406	0.0684764	0.886192	1	280.744	189.236	194.045	214.794	147.448	146.148
APOLD1	ENSG00000178878	1.16528	-1.57077	-0.65147	0.0708552	0.886192	1	1.83681	2.7932	1.29326	2.07918	3.30166	4.60166
COX14	ENSG00000178449	11.2951	1.3657	0.449644	0.0704846	0.886192	1	33.7149	35.3879	23.421	25.1362	29.6037	18.2159
GDF11	ENSG00000135414	3.84442	-1.34613	-0.428818	0.067842	0.886192	1	10.9188	7.79044	4.70999	9.80689	10.9383	12.245
PIP4K2C	ENSG00000166908	12.8129	1.28417	0.360834	0.0698718	0.886192	1	35.7002	37.6307	31.0918	35.6029	27.383	25.3122
ATP2B1-AS1	ENSG00000271614	1.15937	-1.66154	-0.732517	0.0680798	0.886192	1	2.23282	2.04447	1.36538	2.41165	3.47357	4.04229
LINC00173	ENSG00000196668	0.0367121	3.23269	1.69273	0.070209	0.886192	1	0.223645	0.0682226	0.0325164	0	0.0541711	0.0395201
VWA8-AS1	ENSG00000278338	0.0895401	-2.51509	-1.33061	0.0686771	0.886192	1	0.147918	0.0620429	0.078856	0.0714737	0.284638	0.407323
INTS6-AS1	ENSG00000236778	0.246346	-1.59211	-0.670944	0.0708072	0.886192	1	0.451261	0.428442	0.360855	0.527373	0.748746	0.832962
AL162311.3	ENSG00000258938	0.174451	-2.00123	-1.00089	0.0681474	0.886192	1	0.351265	0.124071	0.23654	0.428792	0.476166	0.592946
AL109628.2	ENSG00000285830	0.0452303	2.45489	1.29566	0.066837	0.886192	1	0.100832	0.155075	0.107508	0.081203	0.0447762	0.0326661
FKBP3	ENSG00000100442	23.4525	1.33377	0.41551	0.0707034	0.886192	1	86.2164	41.1828	68.0259	66.0034	40.3141	49.6478
PSMA3	ENSG00000100567	90.3373	1.39172	0.476865	0.0686271	0.886192	1	353.968	169.384	233.984	244.013	133.436	197.701
AL133445.3	ENSG00000287310	0.0352999	-6.00298	-2.58568	0.0702918	0.886192	1	0.0399427	0	0	0.0386005	0.0709491	0.194101
VIPAS39	ENSG00000151445	3.49518	-1.33634	-0.418286	0.0713924	0.886192	1	5.79529	8.1347	6.61873	8.23447	11.1603	10.512
ATP5MPL	ENSG00000156411	11.0885	1.27607	0.351711	0.0673905	0.886192	1	36.2414	25.3895	29.8371	31.0187	24.6195	21.3751
SLC12A6	ENSG00000140199	0.741677	-1.28453	-0.361243	0.0710979	0.886192	1	1.99772	1.48964	1.17232	2.63397	2.07683	1.67066
SRP14	ENSG00000140319	64.255	1.33956	0.42176	0.0690735	0.886192	1	217.531	141.516	172.543	181.645	128.047	116.241
NDRG4	ENSG00000103034	0.0239991	-2.18435	-1.1272	0.0690049	0.886192	1	0.0604378	0.0184364	0.0131808	0.127433	0.0439175	0.0373796
NFAT5	ENSG00000102908	1.95552	-1.30438	-0.383364	0.0687061	0.886192	1	5.43904	3.34003	3.41903	4.85026	6.05332	5.84528
AC009163.7	ENSG00000274220	0.617525	-1.70133	-0.766665	0.0683557	0.886192	1	1.05718	1.14769	0.696196	1.52246	1.96988	1.79303
GINS2	ENSG00000131153	7.91358	1.40203	0.487512	0.0668318	0.886192	1	29.2436	19.5316	17.2095	23.6462	11.4506	15.0911
AC009108.3	ENSG00000270020	0.116242	-2.20285	-1.13937	0.0709649	0.886192	1	0.24127	0.126498	0.0723501	0.349743	0.16071	0.49829
AC040977.1	ENSG00000262089	0.228967	3.29922	1.72213	0.0697219	0.886192	1	1.23624	0.259266	0.494287	0	0.411732	0.150188
CDRT1	ENSG00000241322	0.0131455	4.3882	2.13363	0.0682413	0.886192	1	0.0494671	0.0207485	0.0395568	0.0119512	0.0109834	0
FAM222B	ENSG00000173065	5.67236	1.30858	0.388006	0.0681455	0.886192	1	13.4481	15.1762	17.1109	12.606	16.127	9.51999
LINC00672	ENSG00000263874	0.0125044	-5.97341	-2.57856	0.0669897	0.886192	1	0.0143564	0	0	0.041622	0.0510019	0.013953
EIF1	ENSG00000173812	125.983	-1.48683	-0.572236	0.0704354	0.886192	1	162.231	273.535	224.619	215.848	466.914	389.735
AC015912.3	ENSG00000274213	3.30805	-1.90538	-0.93008	0.0690051	0.886192	1	5.17855	3.19426	5.35904	5.44611	15.5563	6.95741
ITGB4	ENSG00000132470	0.151434	-1.68804	-0.75535	0.0670172	0.886192	1	0.321426	0.151261	0.250762	0.545488	0.494351	0.259058
BIRC5	ENSG00000089685	34.8017	1.33424	0.416022	0.0677775	0.886192	1	116.15	80.047	91.3807	103.144	73.2342	55.7274
WDR45B	ENSG00000141580	19.232	1.2555	0.328265	0.0680053	0.886192	1	59.7829	47.2258	51.0009	46.5807	44.9615	43.5153
AP005262.2	ENSG00000266602	0.0279608	-2.30522	-1.20491	0.0704398	0.886192	1	0.0635401	0.0193828	0.0184765	0.0837339	0.0461718	0.112281
LINC00667	ENSG00000263753	2.91369	-1.31122	-0.39091	0.068709	0.886192	1	6.5533	6.37844	4.76171	7.03337	10.6937	7.12444
TPGS2	ENSG00000134779	6.02673	1.30916	0.388638	0.0710237	0.886192	1	19.9398	13.8958	15.929	17.0307	11.7453	12.039
NETO1	ENSG00000166342	0.00503621	22.307	4.47942	0.0708253	0.886192	1	0	0	0.0380947	0	0	0
ABHD17A	ENSG00000129968	3.23404	1.31213	0.391906	0.0668922	0.886192	1	9.84273	9.74893	6.93876	8.87784	8.08222	4.89215
AMH	ENSG00000104899	1.99171	1.67752	0.746332	0.0701563	0.886192	1	10.0599	2.32031	4.78409	4.73222	1.78327	4.02239
NDUFA11	ENSG00000174886	5.95562	1.31374	0.393674	0.069167	0.886192	1	20.1763	14.2976	14.8028	16.9367	12.6077	10.6883
C3	ENSG00000125730	0.0425921	2.0433	1.0309	0.069247	0.886192	1	0.268342	0.053597	0.0562001	0.0802672	0.0170232	0.0869337
AC010422.1	ENSG00000230310	0.257834	-2.59529	-1.3759	0.0697164	0.886192	1	0.195226	0.081886	0.468344	0.377332	0.69355	1.13844
NDUFA13	ENSG00000186010	15.3226	1.33012	0.411553	0.068913	0.886192	1	47.132	37.9127	40.7417	42.7677	29.2913	30.0564
TIMM50	ENSG00000105197	15.5884	1.30124	0.379889	0.0708735	0.886192	1	55.237	34.4547	39.7861	45.3399	30.3642	30.6136
ZNF780B	ENSG00000128000	3.30423	-1.36243	-0.446184	0.0705805	0.886192	1	7.69903	7.15641	4.74361	8.15551	9.12553	11.0846
PPM1N	ENSG00000213889	0.570412	-1.71529	-0.778454	0.0692499	0.886192	1	0.989573	1.21061	0.478089	1.81302	1.15352	1.9636
ZNF836	ENSG00000196267	0.797222	-1.53907	-0.622055	0.0691076	0.886192	1	1.37381	1.54011	1.22841	1.62938	2.15186	3.05882
AC008735.1	ENSG00000267096	0.123063	-3.2124	-1.68365	0.0698946	0.886192	1	0.198269	0.0554415	0.0528493	0.510951	0.234787	0.321162
SRXN1	ENSG00000271303	5.19571	1.32894	0.410272	0.0670678	0.886192	1	13.5555	13.1184	15.4742	14.0682	11.1318	9.43222
CFAP298	ENSG00000159079	4.47008	1.2854	0.362218	0.0703359	0.886192	1	14.1167	11.4226	11.2337	12.0022	9.00022	9.74417
SEPTIN5	ENSG00000184702	1.34271	1.35775	0.441216	0.0668758	0.886192	1	5.33059	3.34163	2.60031	3.91691	2.0835	2.77663
KIAA0930	ENSG00000100364	1.82098	1.33005	0.411478	0.0712944	0.886192	1	6.57061	4.25602	4.32354	5.38865	3.77293	3.01302
CPT1B	ENSG00000205560	0.727148	-1.64923	-0.721792	0.0693602	0.886192	1	2.2225	0.737094	0.795625	2.22274	0.975463	3.11448
CFP	ENSG00000126759	0.0226029	-2.65768	-1.41017	0.070041	0.886192	1	0.00943635	0.00791599	0.0452752	0.0638348	0.100569	0.0275135
DPYSL5	ENSG00000157851	7.82496	1.38051	0.465197	0.0715239	0.886436	1	23.7946	19.2102	21.1745	19.1722	10.7735	20.005
LINC02846	ENSG00000260193	0.162363	-2.32254	-1.2157	0.0715593	0.886436	1	0.278132	0.166657	0.127092	0.345581	0.21173	0.849563
BRI3BP	ENSG00000184992	8.78649	1.3185	0.398901	0.0715294	0.886436	1	33.0692	18.0032	22.3086	28.8783	15.6401	14.9325
AL357522.1	ENSG00000287616	0.248786	-2.39893	-1.26239	0.0716731	0.887287	1	0.238246	0.39972	0.190515	0.208312	0.705315	1.21288
RAMP1	ENSG00000132329	0.1481	1.86047	0.895666	0.0717396	0.88733	1	0.508321	0.34889	0.36953	0.267949	0.0820832	0.359299
FRAS1	ENSG00000138759	5.54697	-1.3092	-0.388689	0.0719352	0.88733	1	11.9905	12.5751	9.41621	13.3931	14.8991	19.3457
AC079766.1	ENSG00000272646	0.31229	-2.77339	-1.47165	0.0719157	0.88733	1	0.372393	0.208263	0.297788	1.7994	0.330736	0.603213
DIAPH1	ENSG00000131504	7.54876	1.29925	0.377684	0.0720872	0.88733	1	23.0918	19.9742	18.8793	19.5584	15.7852	15.9957
AC004982.1	ENSG00000272732	0.72924	-1.73996	-0.799055	0.072092	0.88733	1	1.47322	1.10153	0.819531	1.94987	2.30396	1.9921
UPK3BL1	ENSG00000267368	4.49797	-1.56861	-0.649484	0.0722172	0.88733	1	10.0715	5.93076	7.32738	10.2293	12.9789	15.3545
MAGOHB	ENSG00000111196	6.57979	1.29386	0.371685	0.0722082	0.88733	1	23.3638	14.8581	16.4408	19.022	12.6758	13.4029
NFATC4	ENSG00000100968	2.03803	-1.43746	-0.523517	0.0718609	0.88733	1	5.7232	2.93546	3.06447	5.81622	4.49712	7.26587
U95743.1	ENSG00000262267	4.65425	-1.68737	-0.754779	0.0718299	0.88733	1	4.72795	8.98175	7.25633	9.77332	24.2717	5.19265
CLPTM1	ENSG00000104853	7.43475	1.30045	0.379011	0.0721712	0.88733	1	24.7803	19.1994	17.4532	22.6708	16.2983	11.8903
AL035461.3	ENSG00000286235	3.91766	1.48751	0.572901	0.0720986	0.88733	1	13.3911	8.70016	10.3468	9.88281	7.72533	5.7912
SUMO3	ENSG00000184900	25.3223	1.3281	0.409359	0.0721316	0.88733	1	86.4904	58.3958	64.7723	73.9844	39.7171	55.361
AL391684.1	ENSG00000224934	0.936895	-1.57796	-0.658059	0.0723645	0.888032	1	2.18599	1.32845	1.34083	2.02851	2.76878	3.22908
SLC25A39	ENSG00000013306	37.7411	1.26674	0.341125	0.0723374	0.888032	1	116.2	97.478	96.1779	102.228	84.1497	77.1986
LMO2	ENSG00000135363	8.75227	1.45735	0.543344	0.0724827	0.888398	1	24.4521	17.1346	29.7398	10.3825	13.4917	28.2476
AP3B2	ENSG00000103723	0.40151	-1.56685	-0.647864	0.0724845	0.888398	1	1.11522	0.401518	0.64301	0.707702	0.6929	2.06542
AC020911.3	ENSG00000287961	0.157566	-3.34499	-1.742	0.0726188	0.889209	1	0.0804309	0.202416	0.0643173	0.544097	0.642902	0.156341
SAMHD1	ENSG00000101347	1.05245	1.37666	0.461168	0.072641	0.889209	1	3.76078	2.67709	2.31102	2.87932	2.54582	1.37238
TPPP3	ENSG00000159713	0.0825638	-2.42078	-1.27547	0.0729149	0.891609	1	0.0815132	0.13676	0.0488871	0.295403	0.199086	0.217862
ZNF57	ENSG00000171970	1.3034	1.50726	0.591927	0.0729276	0.891609	1	3.90003	2.54463	4.23121	3.48245	2.43071	1.7733
SLC30A10	ENSG00000196660	0.20174	1.47874	0.56437	0.0731563	0.891638	1	0.367445	0.839963	0.396672	0.257446	0.562938	0.366047
KIF26B	ENSG00000162849	0.231921	1.6621	0.733004	0.0730079	0.891638	1	0.872115	0.425996	0.638543	0.522754	0.281063	0.432744
NEFL	ENSG00000277586	0.261873	1.48244	0.567973	0.0731491	0.891638	1	0.930539	0.667629	0.577667	0.615289	0.619833	0.321296
GRASP	ENSG00000161835	0.354827	-1.67836	-0.74705	0.0730585	0.891638	1	0.6196	0.535522	0.525497	0.834662	1.40074	0.784669
IRS2	ENSG00000185950	1.38872	-1.31582	-0.395967	0.0731471	0.891638	1	3.7238	2.19704	2.64517	3.68659	4.03448	4.19392
SEMA3B	ENSG00000012171	0.0957298	-1.78791	-0.838277	0.0736172	0.893231	1	0.13784	0.131049	0.154315	0.222013	0.285648	0.312588
PHC3	ENSG00000173889	3.058	-1.27227	-0.34741	0.0735186	0.893231	1	8.15157	5.97883	5.30847	7.84131	9.40437	8.95466
MYOT	ENSG00000120729	1.4599	-1.82686	-0.869363	0.073442	0.893231	1	0.567965	2.64356	2.79832	6.79902	2.50588	3.38325
ABCF2_1	ENSG00000285292	10.9879	1.29179	0.369372	0.0735493	0.893231	1	32.5816	26.8269	30.5395	29.6678	28.6026	17.1593
ECHS1	ENSG00000127884	18.2327	1.31714	0.397407	0.0736614	0.893231	1	55.8679	44.673	49.0897	49.4579	36.2368	36.8709
AC048344.1	ENSG00000257530	0.115093	-5.99574	-2.58394	0.073456	0.893231	1	0	0.109248	0	0.125855	0.231325	0.632855
AC011611.4	ENSG00000257839	0.0598476	-6.02185	-2.59021	0.0735119	0.893231	1	0.0680411	0	0	0	0.241719	0.264516
TIMM9	ENSG00000100575	139.482	-1.34497	-0.427576	0.0736952	0.893231	1	208.348	306.476	298.731	297.353	413.965	483.421
ALOX12B	ENSG00000179477	0.247677	-1.82212	-0.865616	0.073571	0.893231	1	0.443952	0.388616	0.262399	0.429033	0.840008	0.844191
CENPX	ENSG00000169689	12.7252	1.38511	0.469997	0.0737479	0.89332	1	45.526	30.0881	30.1762	36.8028	23.4297	21.4672
ZBTB9	ENSG00000213588	5.86886	1.3876	0.472588	0.073834	0.893814	1	12.7139	17.4754	16.8836	12.0144	18.2981	7.05114
WDR17	ENSG00000150627	2.45976	-1.35221	-0.435317	0.0739583	0.894769	1	4.52788	5.72316	4.11474	5.89115	8.2839	6.84836
PRDX3	ENSG00000165672	36.4995	1.29285	0.37055	0.0740194	0.894958	1	111.373	84.3752	103.686	108.646	64.2662	77.508
IDI2-AS1	ENSG00000232656	0.115658	-2.05731	-1.04076	0.074073	0.895056	1	0.221641	0.119527	0.113938	0.504885	0.337453	0.153866
AC016575.1	ENSG00000272057	0.241831	-3.64622	-1.8664	0.0741947	0.895977	1	0	0.465593	0	0.268182	1.35555	0.404564
AC087239.1	ENSG00000278743	3.07001	-1.73911	-0.798346	0.0742971	0.896115	1	4.81854	4.66407	4.59419	3.85067	11.2749	10.9873
AKAP8	ENSG00000105127	6.23226	1.28173	0.358091	0.0742767	0.896115	1	18.9882	15.4424	16.6936	15.6673	16.3271	10.996
TSSK3	ENSG00000162526	0.352369	-1.85971	-0.895074	0.0748544	0.897225	1	0.687991	0.480953	0.366772	0.997308	0.840165	1.19801
SARS	ENSG00000031698	36.982	-1.53561	-0.618816	0.0751478	0.897225	1	35.7491	91.1231	58.9031	53.1392	144.013	117.055
STUM	ENSG00000203685	0.557254	-1.73958	-0.798742	0.0747557	0.897225	1	1.39217	0.425195	0.853863	2.12258	0.672239	2.05585
CYP1B1	ENSG00000138061	96.6378	1.37822	0.462807	0.0751636	0.897225	1	308.734	192.217	294.67	308.124	149.373	167.945
FAM47E-STBD1	ENSG00000272414	0.759429	-1.55219	-0.634303	0.0749605	0.897225	1	0.768411	1.08349	1.89569	2.00657	2.72981	1.74787
ADH5	ENSG00000197894	18.632	1.31909	0.399538	0.075099	0.897225	1	58.3632	44.5738	50.2332	55.1914	37.7778	32.575
PPA2	ENSG00000138777	7.27896	1.32842	0.40971	0.0750605	0.897225	1	20.7104	16.1374	22.5536	18.1709	13.1079	17.0864
AADAT	ENSG00000109576	10.8764	1.2899	0.367262	0.0749616	0.897225	1	28.2509	30.6608	29.2985	27.9052	23.997	22.5657
AC078881.1	ENSG00000250131	0.122572	-1.82828	-0.870484	0.0745331	0.897225	1	0.114537	0.243902	0.162044	0.315034	0.375596	0.359642
NPR3	ENSG00000113389	0.00402949	-5.27559	-2.39933	0.075098	0.897225	1	0	0	0.00424743	0.0102661	0.0235869	0
PCDHGC4	ENSG00000242419	0.121074	2.118	1.0827	0.0750591	0.897225	1	0.404936	0.160907	0.434588	0.226559	0.104106	0.176065
AC006333.2	ENSG00000272686	3.36534	-1.5122	-0.596651	0.0748565	0.897225	1	4.84839	7.47776	5.12902	7.32103	11.5949	9.81695
FOXA1	ENSG00000129514	0.00887129	5.39067	2.43046	0.0744716	0.897225	1	0.0720489	0.0100734	0	0.0116046	0	0
OTX2	ENSG00000165588	295.511	1.28337	0.35994	0.0749174	0.897225	1	743.325	691.185	956.841	703.22	770.45	560.157
TRAPPC1	ENSG00000170043	10.7806	1.36832	0.452411	0.075017	0.897225	1	37.6143	24.2635	27.5449	32.4572	18.0098	19.6204
CU633906.5	ENSG00000288187	1.01082	-1.70368	-0.768652	0.0745401	0.897225	1	2.61584	1.43193	0.850893	2.22801	3.83922	2.54233
AP001412.1	ENSG00000272948	0.682323	-1.97904	-0.984804	0.0746723	0.897225	1	0.742353	0.93412	1.00917	0.932629	2.90096	1.94802
PLK3	ENSG00000173846	1.84893	-1.59956	-0.677678	0.0754094	0.899069	1	2.96325	3.66191	2.54795	2.44798	7.18784	6.06963
HES1	ENSG00000114315	2.37694	-1.6807	-0.749064	0.0753919	0.899069	1	3.78416	3.62796	3.84945	3.53261	8.55072	8.15624
CLEC2D	ENSG00000069493	0.309475	-1.65194	-0.724158	0.0754627	0.899161	1	0.746857	0.396373	0.408311	0.714395	0.643005	1.31101
SNIP1	ENSG00000163877	2.45137	1.29189	0.369483	0.075629	0.89967	1	6.43315	6.99077	6.47118	5.41074	6.84963	4.45053
TSNAX-DISC1	ENSG00000270106	0.251812	1.65511	0.726931	0.0756425	0.89967	1	1.2851	0.68699	0.201498	0.365269	0.391637	0.575512
AC005943.1	ENSG00000267059	7.56189	1.52943	0.612999	0.0755772	0.89967	1	19.7839	20.6345	20.9387	22.6464	15.0808	6.52927
UBAP2	ENSG00000137073	8.54509	1.26402	0.338023	0.0757405	0.900292	1	30.5596	18.623	21.8511	23.5326	16.6535	19.6114
AC092647.5	ENSG00000249773	0.265855	-2.61689	-1.38785	0.0759649	0.902118	1	0	0.410754	0.318133	1.44914	0.842561	0
MMP2	ENSG00000087245	27.9004	1.33363	0.415356	0.0759857	0.902118	1	95.5784	66.2993	69.1888	76.9757	52.3163	56.101
ABRACL	ENSG00000146386	2.75308	1.46309	0.54902	0.0761628	0.902589	1	10.8619	5.74866	6.48637	8.28936	4.59568	3.89643
SNORD124	ENSG00000238793	0.669506	-3.63658	-1.86258	0.0761366	0.902589	1	0.509654	0.855079	0	0.985054	2.71585	1.98132
OGT	ENSG00000147162	23.472	-1.27128	-0.346286	0.0761202	0.902589	1	66.1006	43.5781	41.0251	59.8332	62.0399	79.83
AC016737.1	ENSG00000271151	0.614969	-1.85055	-0.887952	0.0763201	0.902964	1	1.78665	0.582863	0.436551	1.58273	1.71902	1.97761
AC139100.2	ENSG00000278000	1.23141	-1.89749	-0.92409	0.076332	0.902964	1	1.52126	1.41049	2.11285	3.55929	4.83547	2.10104
SNX21	ENSG00000124104	1.18138	-1.45846	-0.544448	0.0762921	0.902964	1	2.39155	2.27881	1.81888	3.70543	2.85126	3.62546
AC074091.2	ENSG00000259080	0.210206	3.22369	1.68871	0.076575	0.903918	1	0.456668	0.791721	0.438215	0	0.135194	0.414246
AC092162.2	ENSG00000230552	0.00743158	-21.1293	-4.40118	0.0766421	0.903918	1	0	0	0	0.0575445	0	0.00826744
AC053503.5	ENSG00000268603	0.42025	-2.3929	-1.25876	0.0766167	0.903918	1	0.750056	0.489385	0.19993	0.322156	1.7764	1.45796
TMEM70	ENSG00000175606	5.96752	1.2967	0.37485	0.0766279	0.903918	1	18.5034	15.8353	14.6827	16.6448	12.5975	11.5225
KRBA2	ENSG00000184619	0.877744	-1.50709	-0.591767	0.0764799	0.903918	1	1.76155	1.64593	1.28266	2.53277	1.88248	3.15963
Z97832.2	ENSG00000272374	0.329467	-1.776	-0.828628	0.0767862	0.903994	1	0.659284	0.438276	0.417783	0.721279	0.828586	1.28151
UNC5B-AS1	ENSG00000237512	0.395192	-2.06209	-1.0441	0.0767165	0.903994	1	0.374851	0.628912	0.479605	0.869412	1.06534	1.45727
CSTB	ENSG00000160213	6.43029	1.2878	0.364904	0.076752	0.903994	1	23.9764	13.7178	15.9631	19.2915	12.2741	12.7772
MIR3681HG	ENSG00000224184	0.0202059	2.27934	1.18862	0.0769071	0.904115	1	0.0439398	0.0579234	0.0602346	0.0181985	0.0445994	0.0122014
BZW1	ENSG00000082153	14.5603	1.35267	0.435808	0.0768438	0.904115	1	59.1599	27.9434	35.4022	41.7005	19.8838	33.8269
TIPARP	ENSG00000163659	4.60927	1.33227	0.413883	0.0771293	0.904115	1	11.175	11.2828	14.7553	8.75057	13.7595	7.94181
STAM-AS1	ENSG00000260589	1.00096	-1.58581	-0.665216	0.0770043	0.904115	1	2.63488	1.45643	1.09434	2.28973	3.64625	2.60054
GOT1	ENSG00000120053	15.7487	-1.33868	-0.42081	0.0771638	0.904115	1	30.4598	32.7427	30.7747	30.0913	44.453	60.4189
ADIPOR2	ENSG00000006831	12.4466	1.24467	0.315769	0.077128	0.904115	1	38.0236	31.9431	32.1577	33.1178	27.9736	27.2458
AC020916.1	ENSG00000267519	0.0882696	-1.7189	-0.781482	0.0770451	0.904115	1	0.250426	0.105039	0.0734269	0.158651	0.353388	0.237979
PTPN1	ENSG00000196396	9.56832	1.27504	0.350542	0.0770025	0.904115	1	34.1948	20.0919	25.2465	27.3036	16.74	22.3981
TMEM51	ENSG00000171729	3.68736	1.36566	0.449595	0.0791173	0.904154	1	10.5392	8.48354	11.0792	6.68323	7.4251	9.57552
MFAP2	ENSG00000117122	0.0625396	1.8644	0.898712	0.0808179	0.904154	1	0.214987	0.131163	0.171916	0.22665	0.0520738	0.018995
EBNA1BP2	ENSG00000117395	7.60503	1.36415	0.448007	0.0825992	0.904154	1	30.7962	12.8235	20.3415	21.3608	9.45196	18.5747
SLC6A9	ENSG00000196517	1.85873	-1.73734	-0.796878	0.0801281	0.904154	1	1.387	3.74915	3.14664	1.85669	6.27784	7.69871
AL355990.1	ENSG00000227091	0.82039	2.06544	1.04645	0.0805406	0.904154	1	4.47022	0.803568	1.86392	2.19086	0.48209	0.899951
AL390066.1	ENSG00000224950	0.03866	3.04173	1.60489	0.0777663	0.904154	1	0.276302	0	0.0736492	0.0222514	0.040899	0.0447562
PRKAB2	ENSG00000131791	9.53614	-1.30932	-0.388823	0.0797675	0.904154	1	17.7554	21.3851	18.4212	21.6055	30.7193	29.2387
CREB3L4	ENSG00000143578	3.61957	-1.31928	-0.39975	0.0818267	0.904154	1	8.09123	6.52712	7.43419	11.0671	7.67276	12.5147
ADIPOR1	ENSG00000159346	38.9701	1.24753	0.319078	0.0824572	0.904154	1	129.828	96.1556	96.003	115.527	85.1065	76.4194
IRF6	ENSG00000117595	0.019871	-2.70887	-1.43769	0.0806665	0.904154	1	0.0106626	0.0357788	0.00852647	0.0515217	0.0568192	0.062178
ANKRD36B	ENSG00000196912	2.71758	-1.30068	-0.379263	0.081261	0.904154	1	8.04727	4.93827	4.16277	6.1655	8.03002	9.09168
WIPF1	ENSG00000115935	1.4171	1.40463	0.490193	0.0798784	0.904154	1	4.63153	3.78293	3.27612	2.96521	3.09152	2.82959
NFE2L2	ENSG00000116044	15.6714	1.2565	0.329406	0.0824236	0.904154	1	45.9567	38.764	43.4614	32.6161	37.5286	39.3603
KLF7	ENSG00000118263	4.0415	-1.28159	-0.35793	0.0823985	0.904154	1	8.96753	8.17079	8.23265	8.92058	10.1092	15.7068
EIF4E2	ENSG00000135930	10.6405	1.25236	0.324652	0.0824605	0.904154	1	34.7861	26.9023	26.0906	30.679	23.0885	21.5095
AC090946.1	ENSG00000286689	0.189341	-2.38486	-1.25391	0.0779547	0.904154	1	0.143254	0.240346	0.229109	0.738347	0.127229	0.78896
HYAL1	ENSG00000114378	0.0537993	2.375	1.24793	0.0786045	0.904154	1	0.0687248	0.201782	0.15113	0.0498115	0.0305185	0.116889
ALCAM	ENSG00000170017	4.12514	1.27037	0.345247	0.0778522	0.904154	1	12.7803	9.61252	11.4893	10.3245	9.98674	8.36688
TBILA	ENSG00000261488	0.468218	-1.84773	-0.885756	0.0821032	0.904154	1	1.01247	0.527968	0.568928	1.13711	0.558967	2.36695
MCM2	ENSG00000073111	15.1269	1.35098	0.434004	0.0822932	0.904154	1	59.5466	30.7524	36.5779	48.8111	22.534	28.4504
AC107294.2	ENSG00000272970	0.0715446	-1.94027	-0.956255	0.0818427	0.904154	1	0.114802	0.125197	0.0550814	0.210794	0.234507	0.167363
JAKMIP1	ENSG00000152969	0.826296	1.62285	0.698532	0.0794511	0.904154	1	3.0868	1.56301	2.24601	1.74684	1.66713	1.09461
MAPK10	ENSG00000109339	0.202986	-1.40519	-0.490766	0.0824897	0.904154	1	0.319593	0.465265	0.35998	0.414609	0.523506	0.804932
ANXA5	ENSG00000164111	20.722	1.30284	0.38166	0.0808524	0.904154	1	69.8928	42.8832	58.6001	56.6866	35.7285	48.2915
SFRP2	ENSG00000145423	0.0194585	5.38671	2.4294	0.082681	0.904154	1	0.185886	0	0	0	0.0235845	0
NEK1	ENSG00000137601	2.75475	-1.29336	-0.371125	0.0796307	0.904154	1	5.85034	6.06377	5.0252	6.96083	8.7656	7.85614
NDUFS6	ENSG00000145494	13.4898	1.38232	0.467095	0.0778565	0.904154	1	45.5155	28.2535	37.799	36.2196	25.1757	25.1714
TAF9	ENSG00000273841	14.3519	1.28376	0.36038	0.0775895	0.904154	1	46.2462	28.0731	43.9217	42.1675	29.8364	27.2785
SMN2	ENSG00000205571	11.4576	1.25913	0.332425	0.0785828	0.904154	1	37.9706	28.8404	27.8157	23.9698	25.093	30.7957
ATP6AP1L	ENSG00000205464	0.328726	-1.64023	-0.713902	0.0786885	0.904154	1	0.531146	0.711673	0.348047	0.613106	1.22519	0.960742
ADGRV1	ENSG00000164199	5.78485	-1.26272	-0.336534	0.0788003	0.904154	1	15.7717	10.9931	10.4352	15.1221	15.9783	18.5773
AC009126.1	ENSG00000247121	0.312077	-1.64328	-0.716576	0.0813411	0.904154	1	0.493001	0.540823	0.475101	0.855139	0.785888	1.04429
ZNF608	ENSG00000168916	3.42741	-1.49225	-0.577493	0.0796371	0.904154	1	4.00478	8.06161	5.83545	5.3576	11.7789	12.086
AC131025.3	ENSG00000285736	0.168858	-2.68945	-1.42731	0.0783746	0.904154	1	0.185545	0.207534	0.0989151	0.717239	0.439437	0.300551
PPARGC1B	ENSG00000155846	2.79434	1.26477	0.338874	0.0817894	0.904154	1	9.33913	6.65806	7.09652	7.39987	6.27468	5.85927
MGAT4B	ENSG00000161013	2.80554	1.29628	0.374374	0.0773288	0.904154	1	9.90629	5.55902	7.82909	8.31497	5.33713	5.56862
ELOVL2-AS1	ENSG00000230314	0.135991	1.90213	0.927616	0.0773036	0.904154	1	0.352393	0.452118	0.29837	0.160259	0.257742	0.201464
MYLIP	ENSG00000007944	10.0735	1.3446	0.427182	0.0809285	0.904154	1	41.5474	17.9333	25.4007	26.4785	23.3075	16.7187
HIST1H2AH	ENSG00000274997	242.959	1.60352	0.681247	0.0802755	0.904154	1	946.813	402.245	686.595	651.073	260.918	436.741
AL121944.1	ENSG00000272009	0.380699	-2.0202	-1.0145	0.0775783	0.904154	1	0.309061	0.648165	0.494287	0.67202	1.44106	1.12641
RN7SKP163	ENSG00000200091	0.480502	2.30114	1.20235	0.0781557	0.904154	1	1.28494	1.07792	1.54128	1.08654	0.285301	0.468313
TCTE3	ENSG00000184786	1.51194	-1.46487	-0.55077	0.0792987	0.904154	1	3.64642	2.33221	2.38426	4.18583	4.34784	4.44461
GLCCI1	ENSG00000106415	4.10188	1.29507	0.373035	0.0791395	0.904154	1	13.7843	7.29333	12.8331	10.8355	8.46018	8.74166
SNORA22B	ENSG00000206603	1.09696	2.92749	1.54966	0.0804354	0.904154	1	3.07269	0.644407	5.22135	1.11354	1.36448	0.746586
AC099398.1	ENSG00000261467	0.0292936	-3.26282	-1.70612	0.078585	0.904154	1	0.057281	0	0.0152684	0.0553561	0.101746	0.0927854
AC004877.1	ENSG00000273419	0.135741	-2.54949	-1.35021	0.0827459	0.904154	1	0.181299	0.130361	0.124266	0.200236	0.276031	0.692229
AC010857.1	ENSG00000272479	0.165233	-2.70951	-1.43803	0.0806106	0.904154	1	0.178465	0.224566	0.0713554	0.258701	0.871754	0.260174
AC023632.2	ENSG00000253704	0.143319	-1.82786	-0.870158	0.0786738	0.904154	1	0.261287	0.203533	0.164168	0.396797	0.364663	0.471611
COX6C	ENSG00000164919	15.9674	1.40754	0.493174	0.0790766	0.904154	1	63.2452	26.7572	43.9949	49.2019	20.2393	31.6077
GLDC	ENSG00000178445	4.0876	1.37882	0.463429	0.0826185	0.904154	1	12.4283	8.18251	12.9114	12.1997	7.19365	7.00191
AL512604.3	ENSG00000260100	0.233975	-2.13404	-1.09359	0.0784995	0.904154	1	0.3299	0.276748	0.263808	0.637629	0.927821	0.427506
PTAR1	ENSG00000188647	14.2496	-1.25411	-0.326664	0.082657	0.904154	1	33.5623	30.6734	26.2883	41.3395	45.7991	34.9274
LINC00476	ENSG00000175611	0.455208	-1.52106	-0.605075	0.077691	0.904154	1	1.1325	0.655655	0.650509	1.1561	1.39538	1.34871
KLF4	ENSG00000136826	0.385656	-1.78035	-0.83216	0.0787393	0.904154	1	0.752651	0.412829	0.590289	0.363679	1.55545	1.35046
NIBAN2	ENSG00000136830	3.48454	1.44101	0.527081	0.0793887	0.904154	1	12.6397	7.7622	8.60187	9.95167	6.51521	5.07669
LINC02639	ENSG00000230573	0.560483	-3.26388	-1.70659	0.0810127	0.904154	1	0	0.829554	0.47446	0.860085	0.087826	3.94047
HSPA14_2	ENSG00000187522	5.97758	1.39808	0.483443	0.0825907	0.904154	1	18.8331	11.2493	19.075	15.2727	12.7188	9.94463
PLCE1	ENSG00000138193	0.353972	-1.32661	-0.407741	0.0825823	0.904154	1	0.758371	0.746227	0.61955	1.22808	0.932028	0.888455
OAT	ENSG00000065154	9.12344	1.3199	0.400433	0.0775547	0.904154	1	32.1341	20.4866	23.1191	27.4559	20.5639	13.5324
HRAS	ENSG00000174775	4.77733	1.3326	0.414249	0.0816964	0.904154	1	17.8747	11.589	10.4159	12.0973	10.091	9.50825
DDB1	ENSG00000167986	33.3856	1.27541	0.350958	0.0820597	0.904154	1	110.731	74.1036	90.8925	98.9684	61.845	71.3263
PRDX5	ENSG00000126432	27.2072	1.30807	0.387444	0.0819821	0.904154	1	88.8125	59.1476	76.441	74.3922	42.5315	66.9688
CDC42BPG	ENSG00000171219	0.322834	1.53933	0.6223	0.0825801	0.904154	1	1.14432	0.674008	0.863148	0.760774	0.583839	0.512699
CFL1	ENSG00000172757	39.4935	1.33098	0.412491	0.0786147	0.904154	1	132.587	91.8394	102.086	107.494	71.6194	83.6088
RAB1B	ENSG00000174903	25.0635	1.26738	0.341852	0.080155	0.904154	1	90.5688	56.116	61.8605	72.5525	46.3505	56.2696
TLCD5	ENSG00000181264	2.49509	-1.48465	-0.570125	0.078345	0.904154	1	4.31814	5.6028	3.4815	4.58575	7.67019	9.08536
ANO2	ENSG00000047617	2.99498	1.2962	0.374287	0.0778897	0.904154	1	12.465	6.59675	6.20022	7.39476	6.53251	6.48151
VWF	ENSG00000110799	0.0327021	-2.77924	-1.47469	0.0827675	0.904154	1	0	0.0727447	0.0122371	0.0246477	0.212926	0.0347032
AC079630.1	ENSG00000225342	0.0910077	-2.47741	-1.30883	0.0824508	0.904154	1	0.0929894	0.0780072	0.11154	0.202195	0.474876	0.0903762
TRHDE	ENSG00000072657	0.46991	1.55369	0.635703	0.0797055	0.904154	1	1.41327	0.823006	1.61398	0.998227	0.948096	0.73088
UBE2N	ENSG00000177889	16.7195	1.34998	0.432934	0.0814191	0.904154	1	54.4728	41.2006	42.2143	46.5255	31.2619	32.0473
NDUFA12	ENSG00000184752	11.8096	1.41339	0.499159	0.0821006	0.904154	1	37.7797	28.1465	31.322	30.168	22.7628	21.1172
SVOP	ENSG00000166111	0.0274259	2.11188	1.07853	0.0781744	0.904154	1	0.0448047	0.106493	0.0656856	0.0505156	0.0397927	0.0217728
TMED2	ENSG00000086598	60.5307	1.28076	0.357	0.0822029	0.904154	1	219.995	117.314	166.577	188.401	112.915	118.941
SCARB1	ENSG00000073060	10.3637	1.2618	0.335487	0.0801572	0.904154	1	35.8244	23.9868	26.0848	31.4775	20.6701	20.7628
LINC00944	ENSG00000256128	0.00855392	-5.95584	-2.57431	0.0825752	0.904154	1	0.00982829	0	0	0.018996	0.0436443	0.00955209
PNP	ENSG00000198805	7.60419	1.28649	0.363441	0.0806221	0.904154	1	25.5864	18.1444	19.1496	23.2043	17.5606	11.8238
LRR1	ENSG00000165501	6.90868	1.32988	0.411297	0.0801997	0.904154	1	19.2847	15.5576	21.4603	17.8555	14.2147	13.8943
DPF3	ENSG00000205683	0.104118	1.41117	0.496891	0.0791061	0.904154	1	0.392394	0.20654	0.270713	0.185886	0.204999	0.261722
AC012378.2	ENSG00000285805	1.61826	-1.76653	-0.820915	0.0774954	0.904154	1	3.27777	2.48141	1.72609	4.24925	3.12411	6.60441
AC103876.1	ENSG00000259986	0.475767	-2.25592	-1.17372	0.0807683	0.904154	1	0.281039	0.943035	0.404524	0.597509	1.4976	1.96662
MAPK8IP3	ENSG00000138834	4.40994	-1.30549	-0.38459	0.0786157	0.904154	1	12.0077	9.1133	6.13626	11.5295	16.3263	9.76696
IL21R-AS1	ENSG00000259954	0.0258942	3.67579	1.87806	0.0826631	0.904154	1	0.0202692	0.034007	0.145876	0.0391762	0	0.0196996
TLCD3B	ENSG00000149926	7.85478	-1.43934	-0.525408	0.0827547	0.904154	1	15.8473	13.9447	14.2748	21.447	14.9835	31.4427
PPP4C	ENSG00000149923	11.1634	1.30602	0.385182	0.0821207	0.904154	1	35.5299	27.5765	28.784	32.949	20.79	22.1099
AC106779.1	ENSG00000261302	0.171404	-2.18441	-1.12724	0.0812575	0.904154	1	0.270947	0.198881	0.162499	0.163651	0.541434	0.757081
GCSH	ENSG00000140905	21.6129	1.31275	0.392596	0.0809419	0.904154	1	75.2607	45.9273	58.0504	66.1146	35.1428	44.9998
USP6	ENSG00000129204	0.0113512	-2.14874	-1.10349	0.0794706	0.904154	1	0.0235155	0.0118361	0.00752176	0.0363605	0.025062	0.0365675
AC087500.1	ENSG00000261879	0.208917	-1.72504	-0.786629	0.0810734	0.904154	1	0.467788	0.251551	0.268564	0.452068	0.703085	0.629504
TMEM107	ENSG00000179029	1.23458	-1.52328	-0.607179	0.0779599	0.904154	1	2.63474	2.30045	1.56942	2.06554	5.21726	3.18781
AC055811.2	ENSG00000264187	0.0297878	24.9104	4.63868	0.0798999	0.904154	1	0	0	0.225319	0	0	0
CCDC144NL-AS1	ENSG00000233098	0.0481155	-1.99586	-0.99701	0.0804565	0.904154	1	0.0238918	0.0734889	0.0827896	0.18856	0.176826	0.0464408
RAB34	ENSG00000109113	5.92159	1.26678	0.341171	0.0795193	0.904154	1	18.9036	13.4752	16.374	16.3454	12.8839	12.1495
CDC6	ENSG00000094804	10.5191	1.35189	0.434977	0.0804611	0.904154	1	41.4571	20.9804	25.8014	29.802	14.0754	25.0443
LRRC59	ENSG00000108829	15.7175	1.31241	0.392213	0.0815053	0.904154	1	65.2976	29.2445	37.9972	47.2739	25.5385	33.5525
CUEDC1	ENSG00000180891	7.19154	-1.27394	-0.349302	0.0823838	0.904154	1	16.7076	15.5303	13.1584	15.1426	21.1529	25.3117
SRSF2	ENSG00000161547	90.9814	1.32313	0.403954	0.0802468	0.904154	1	300.807	217.118	233.308	254.264	219.926	136.922
LINC01977	ENSG00000262772	0.068952	-2.31789	-1.21281	0.0813296	0.904154	1	0.090994	0.127222	0.0242547	0.117248	0.0404075	0.442184
TBC1D16	ENSG00000167291	14.1659	1.29607	0.374147	0.0821612	0.904154	1	58.6848	27.2837	33.4534	45.0561	23.7508	28.4466
BAIAP2-DT	ENSG00000226137	5.79924	1.46745	0.553315	0.0779242	0.904154	1	28.5286	11.0857	10.2122	18.2118	6.19378	10.8576
CHMP1B-AS1	ENSG00000267165	0.132083	3.95585	1.98399	0.0794333	0.904154	1	0.575088	0.16081	0.383229	0.185254	0	0.0931545
CFAP53	ENSG00000172361	0.0552366	2.87679	1.52446	0.0781017	0.904154	1	0.0581184	0	0.371799	0.0842481	0.0258085	0.0564851
AC090398.2	ENSG00000286529	0.0866475	-2.37478	-1.24779	0.0816203	0.904154	1	0.108393	0.0909286	0.0866771	0.2095	0.385069	0.140462
PET100	ENSG00000229833	5.3272	1.41693	0.502765	0.0812772	0.904154	1	18.8377	11.0386	14.3622	15.0813	9.51336	8.84002
KANK3	ENSG00000186994	0.03423	-2.54779	-1.34924	0.0825471	0.904154	1	0.0147479	0.0371153	0.0471732	0.0712616	0.0392944	0.186335
S1PR2	ENSG00000267534	0.0629758	2.03605	1.02577	0.082076	0.904154	1	0.363739	0.0488214	0.139616	0.0984243	0.116298	0.0565626
AC011511.4	ENSG00000267303	1.70565	1.90276	0.928092	0.0801186	0.904154	1	4.98524	5.02324	3.94067	5.34379	1.55219	1.19736
DACT3	ENSG00000197380	0.0307544	-2.18673	-1.12877	0.0779761	0.904154	1	0.0678792	0.0406733	0.00775432	0.0843406	0.103347	0.0753962
PTOV1	ENSG00000104960	4.31004	1.27253	0.347695	0.0799667	0.904154	1	16.5537	7.94268	11.5667	11.822	8.91435	9.26257
ZNF667-AS1	ENSG00000166770	0.0152572	-1.96928	-0.977671	0.081271	0.904154	1	0.0261318	0.0146143	0.0208965	0.0378805	0.0502852	0.042329
PTPRT	ENSG00000196090	0.264404	-1.90912	-0.932906	0.0812099	0.904154	1	0.249806	0.522177	0.301277	1.02501	0.62194	0.636816
TOMM34	ENSG00000025772	13.9221	1.31265	0.392485	0.0818274	0.904154	1	51.2846	31.5057	33.255	39.3063	25.3149	29.3734
AF129075.2	ENSG00000273254	0.319109	-2.15142	-1.10529	0.0779869	0.904154	1	0.666717	0.209736	0.333216	0.885929	1.03624	0.809975
AL022238.4	ENSG00000284431	0.920078	-1.71238	-0.776004	0.0802705	0.904154	1	2.04442	2.08532	0.241511	2.11043	3.64176	2.07729
SNU13	ENSG00000100138	23.1451	1.24898	0.320755	0.0799959	0.904154	1	79.2072	59.3817	53.0864	67.0954	49.1655	47.8889
TSPO	ENSG00000100300	10.5905	1.35145	0.434506	0.0823915	0.904154	1	34.5532	21.0438	31.7441	28.4211	20.9221	20.1421
EFCAB6	ENSG00000186976	0.0341093	-2.28185	-1.1902	0.08215	0.904154	1	0.0619422	0.0311774	0.0297196	0.083805	0.0605144	0.150504
AC107419.1	ENSG00000228933	0.0526539	-2.16698	-1.11569	0.0792789	0.904154	1	0.0622478	0.0783278	0.049777	0.075195	0.255691	0.113435
HSD17B10	ENSG00000072506	20.8139	1.2965	0.374619	0.0790709	0.904154	1	67.788	48.0133	55.8419	57.7463	41.6284	42.8286
SH3BGRL	ENSG00000131171	49.975	1.33158	0.41314	0.0821748	0.904154	1	160.099	103.107	148.338	145.979	89.3871	97.9375
IL13RA1	ENSG00000131724	5.09281	1.39827	0.483642	0.0779746	0.904154	1	17.4058	10.4132	14.3471	14.1661	8.24061	9.92622
PDZD4	ENSG00000067840	0.0120419	-3.90644	-1.96586	0.0826553	0.904154	1	0	0.0102428	0.0097639	0.0353993	0.0325326	0.0356009
CALM2	ENSG00000143933	56.6116	1.31415	0.394128	0.0831256	0.904573	1	211.912	115.954	144.69	152.488	102.123	126.585
CTBP1-DT	ENSG00000196810	2.29141	-1.31379	-0.393737	0.0831733	0.904573	1	6.05276	5.09461	3.04609	6.11137	6.06794	7.51636
NSUN6	ENSG00000241058	4.917	-1.32645	-0.407568	0.0831264	0.904573	1	10.4232	10.9395	8.11473	11.1528	17.6309	13.165
CDCA5	ENSG00000146670	16.9102	1.24754	0.319087	0.0831352	0.904573	1	49.3762	44.863	44.0366	45.2746	37.9277	36.5659
ZNF605	ENSG00000196458	5.97536	-1.27074	-0.345674	0.083094	0.904573	1	17.136	10.8388	10.3751	16.281	16.3366	18.7195
Metazoa_SRP_101	ENSG00000278818	0.545713	2.26	1.17632	0.0828983	0.904573	1	2.23511	1.33928	1.02133	0.617143	0.708956	0.77582
ARHGEF9	ENSG00000131089	3.77924	1.26027	0.33373	0.0831094	0.904573	1	10.2852	10.1506	10.3114	11.042	8.14412	7.3926
MT-CO1	ENSG00000198804	16538.9	1.2627	0.336509	0.0828537	0.904573	1	44935.9	43240.1	46363.9	39344.6	32597.8	43253.9
GAP43	ENSG00000172020	1.00436	1.73482	0.794785	0.0832836	0.904773	1	2.36194	2.25836	3.47286	2.77344	1.01503	1.38228
USP5	ENSG00000111667	14.0597	1.29415	0.372	0.0832795	0.904773	1	56.5489	28.6316	32.9964	41.7813	23.0462	31.5316
TMEM215	ENSG00000188133	0.0138912	3.07031	1.61838	0.0833987	0.905131	1	0.0396885	0.049941	0.0238029	0	0.0352488	0
UQCR11	ENSG00000127540	7.67855	1.3418	0.424173	0.0834085	0.905131	1	26.8616	20.349	16.5018	23.8497	13.988	13.0895
TACO1	ENSG00000136463	15.9613	1.30037	0.378917	0.0835969	0.906677	1	45.8525	36.2079	48.2878	42.5783	33.2893	32.7636
TRIM69	ENSG00000185880	1.12188	-1.38051	-0.465204	0.0837772	0.907457	1	2.23114	2.74511	1.53712	2.60399	2.97234	4.05888
DDX39A	ENSG00000123136	9.12014	1.27909	0.355113	0.0837855	0.907457	1	31.3549	19.4739	24.7219	24.424	16.6792	21.908
ZNF334	ENSG00000198185	3.89703	-1.28469	-0.361423	0.0838071	0.907457	1	8.41578	9.13247	6.55071	9.22235	13.7007	10.3479
AC104958.2	ENSG00000272502	0.267134	-2.40832	-1.26803	0.0838975	0.907937	1	0.278724	0.233816	0.371473	0.583608	0.247544	1.4899
ZSCAN26	ENSG00000197062	4.10807	-1.33367	-0.415401	0.084024	0.908347	1	7.66235	9.71752	6.96543	9.8848	13.5141	11.7326
DDB2	ENSG00000134574	6.75371	-1.34288	-0.425327	0.0840277	0.908347	1	17.1232	8.79839	14.9477	16.0771	17.9666	23.9636
AC012531.2	ENSG00000273046	0.0322731	22.2753	4.47737	0.0840755	0.908366	1	0	0	0.244119	0	0	0
AL591167.1	ENSG00000272371	0.458339	-2.21176	-1.14519	0.0844843	0.910933	1	0.581184	0.682563	0.371799	0.449323	1.96145	1.46861
LINC00342	ENSG00000232931	1.49405	-1.40367	-0.489207	0.0845187	0.910933	1	4.58599	1.67018	2.6272	3.74685	3.14233	5.99674
HAT1	ENSG00000128708	5.13072	1.34118	0.423508	0.0845444	0.910933	1	19.1919	10.5695	13.0636	14.8225	8.474	10.6532
SLC7A11	ENSG00000151012	3.61065	-2.07419	-1.05255	0.0844491	0.910933	1	0.939728	7.73569	4.58348	1.92252	12.7192	16.0499
CCT6B	ENSG00000132141	0.139907	-1.80376	-0.851004	0.0843644	0.910933	1	0.222654	0.197157	0.19783	0.286896	0.395493	0.516948
FDPS	ENSG00000160752	21.9795	1.43283	0.51887	0.0855733	0.911087	1	73.8321	44.9066	62.9735	61.9551	30.0579	44.2126
AC012442.2	ENSG00000243389	0.287708	-2.88942	-1.53078	0.0856816	0.911087	1	0	0.523107	0.199459	0.602622	0.775348	1.09089
THOC3	ENSG00000051596	13.1206	1.27002	0.344856	0.0851194	0.911087	1	43.011	32.5014	32.7493	39.3406	30.4561	22.0052
RSPH3	ENSG00000130363	0.712697	-1.40369	-0.489227	0.0850377	0.911087	1	1.75307	1.28764	1.07239	2.15478	1.86548	2.11208
ACAT2	ENSG00000120437	7.92759	1.55539	0.637273	0.0854138	0.911087	1	33.9033	14.0182	19.1287	22.729	7.72389	14.9527
RAPGEF5	ENSG00000136237	5.14534	1.27979	0.355905	0.085383	0.911087	1	14.3142	12.8663	14.7441	13.219	10.9139	11.3706
AC005154.5	ENSG00000281039	1.6333	-2.52176	-1.33443	0.0852446	0.911087	1	2.85465	0.970832	1.5424	4.47361	4.24837	5.32391
CDK5	ENSG00000164885	3.89839	1.40849	0.494154	0.0850925	0.911087	1	13.2625	8.28632	10.716	10.3692	6.93237	7.25051
AF233439.1	ENSG00000245857	0.0638132	-2.71726	-1.44215	0.0853641	0.911087	1	0.170981	0.0179291	0.0170908	0.0413087	0.132872	0.373895
NPM2	ENSG00000158806	0.0634087	2.26158	1.17733	0.0857151	0.911087	1	0.205541	0.193978	0.123272	0.124146	0.0912743	0.0249706
VXN	ENSG00000169085	0.052492	2.29775	1.20022	0.0853683	0.911087	1	0.0556531	0.130722	0.222517	0.0860526	0.0494275	0.0649069
ANXA11	ENSG00000122359	3.98081	1.31149	0.39121	0.0847846	0.911087	1	14.5196	8.73822	9.89301	11.5707	6.51404	8.82275
WBP1L	ENSG00000166272	1.58896	1.29117	0.368676	0.0847692	0.911087	1	4.74349	3.99059	4.28018	4.98299	2.97485	2.9792
AL360182.2	ENSG00000228417	0.161215	-3.03598	-1.60216	0.085661	0.911087	1	0.225549	0.0946045	0.0901811	0.326954	0.400636	0.657631
TRAPPC4	ENSG00000196655	1.36533	1.35248	0.435611	0.0852085	0.911087	1	4.35362	3.66142	3.22582	3.6854	2.47659	2.77443
POC1B-GALNT4	ENSG00000259075	0.359534	-1.82438	-0.867404	0.0850097	0.911087	1	0.173468	0.679088	0.647336	0.931324	0.941494	1.21761
NRAV	ENSG00000248008	1.32963	-1.44352	-0.529595	0.0855593	0.911087	1	2.98434	2.85657	1.60117	2.94568	4.16831	4.26395
AC068790.2	ENSG00000269938	1.98138	-1.61711	-0.693415	0.0854163	0.911087	1	4.09187	3.35277	2.43505	4.69006	6.16958	6.10404
ERH	ENSG00000100632	80.3533	1.3476	0.430398	0.085642	0.911087	1	289.593	164.793	214.02	221.92	124.221	181.897
AC036108.3	ENSG00000261616	0.111139	2.30663	1.20579	0.0846118	0.911087	1	0.376196	0.0996581	0.443326	0.267882	0.123094	0.0384867
AC120114.4	ENSG00000281348	1.36821	3.17037	1.66465	0.0855989	0.911087	1	4.95721	2.15923	4.269	0.737019	0	2.96486
PSME3	ENSG00000131467	20.2947	1.2993	0.37774	0.0853965	0.911087	1	70.744	48.6655	48.923	53.5782	46.8098	37.9312
LINGO3	ENSG00000220008	0.0314347	-3.75863	-1.91021	0.0852549	0.911087	1	0.0473039	0	0.0189135	0.0914285	0	0.183898
ELL	ENSG00000105656	1.63766	1.33308	0.414763	0.0854638	0.911087	1	5.24867	4.24931	3.9903	4.22864	3.76177	2.84911
FAM122B	ENSG00000156504	7.66928	1.27457	0.350014	0.0849745	0.911087	1	29.3303	16.4267	18.3919	22.5757	15.4137	15.4052
ART3	ENSG00000156219	0.128751	-2.29652	-1.19945	0.0859044	0.911623	1	0.0485088	0.12208	0.245673	0.703181	0.258494	0.157152
GALNT8	ENSG00000130035	0.00903669	-3.44974	-1.78649	0.085895	0.911623	1	0.00552585	0.00927108	0.0044188	0.0160205	0.0441693	0.0161117
AC135012.1	ENSG00000261177	0.0116866	-2.84246	-1.50714	0.0858494	0.911623	1	0.00713378	0.0059844	0.0171138	0.0137881	0.0570219	0.0277332
LAMTOR5-AS1	ENSG00000224699	0.291871	-1.55386	-0.63586	0.0859774	0.911907	1	0.766535	0.509506	0.288061	0.696248	0.569182	1.25387
MIR34AHG	ENSG00000228526	0.889467	-1.61896	-0.695065	0.0861466	0.912465	1	2.45468	1.08324	1.04234	1.7659	2.75892	3.08424
MOB1A	ENSG00000114978	32.3758	1.28857	0.365772	0.0862729	0.912465	1	120.362	67.1864	82.5325	97.9995	64.4646	60.8654
AC096734.2	ENSG00000260519	0.359104	-2.85074	-1.51134	0.0860921	0.912465	1	0.489644	0.205377	0.293661	0.354893	2.28307	0.356913
POLE3	ENSG00000148229	55.1191	1.29594	0.373998	0.0862627	0.912465	1	138.03	155.786	152.144	159.779	138.823	79.4354
OPCML	ENSG00000183715	0.00522042	5.39094	2.43054	0.0863424	0.912465	1	0.0209695	0.0117273	0.011179	0	0.00620793	0
TBX2	ENSG00000121068	0.0592113	1.76157	0.816861	0.086297	0.912465	1	0.305021	0.09504	0.111503	0.151597	0.04644	0.10164
PIN1	ENSG00000127445	6.96391	1.29138	0.368919	0.0863543	0.912465	1	23.7416	15.0224	18.8832	20.8366	13.2983	13.7522
UTP11	ENSG00000183520	16.0269	1.25948	0.332831	0.0864482	0.912627	1	54.0073	37.2047	41.3321	42.2994	31.2578	38.792
CHRNB2	ENSG00000160716	0.419128	1.69117	0.758024	0.086485	0.912627	1	1.90137	0.808851	0.857502	0.888257	0.552219	0.753186
TOMM6	ENSG00000214736	63.1357	1.29641	0.374521	0.086555	0.912627	1	232.069	137.441	156.632	190.497	125.927	116.453
CYC1	ENSG00000179091	26.4833	1.25208	0.324323	0.086536	0.912627	1	77.7374	63.0153	75.8743	71.1849	51.6311	63.9797
VAT1	ENSG00000108828	4.03739	1.27911	0.355143	0.0867963	0.914681	1	14.1915	9.65997	9.66077	12.7983	8.92328	6.37614
MT-ND5	ENSG00000198786	4212.55	1.26092	0.334472	0.08686	0.914863	1	11907.3	11431.5	11026.2	10494.8	8944.74	10003.7
LAMTOR5	ENSG00000134248	7.45689	1.28244	0.358895	0.0869751	0.915454	1	24.1492	17.633	19.6839	21.7504	17.5249	12.3609
AL449106.1	ENSG00000273062	0.670639	-1.72225	-0.784291	0.0871013	0.915454	1	1.25818	0.943178	0.941891	1.86265	1.42651	2.49767
AC104653.1	ENSG00000228857	0.252336	-2.61941	-1.38924	0.0871159	0.915454	1	0.394963	0.132531	0.252668	0.076338	0.841873	1.22836
AC114811.2	ENSG00000260641	0.120355	-1.71212	-0.775788	0.0870672	0.915454	1	0.197111	0.22047	0.14261	0.181416	0.450157	0.392265
KIZ	ENSG00000088970	4.51827	-1.30344	-0.382321	0.0871484	0.915454	1	7.60399	10.2215	9.40987	10.9784	13.7599	13.9693
TRAPPC2L	ENSG00000167515	4.04942	1.30847	0.387885	0.087235	0.915874	1	14.014	10.3414	9.21209	12.6364	7.44673	7.43341
CENPW	ENSG00000203760	12.9921	1.51123	0.595719	0.0873989	0.917106	1	56.2042	20.8618	32.9484	35.7593	17.2311	23.5217
NHS	ENSG00000188158	1.29228	1.45767	0.54366	0.0875954	0.918678	1	3.99289	3.07151	3.54772	3.66652	2.77629	1.46703
AJAP1	ENSG00000196581	0.00414556	-6.62638	-2.72822	0.0879363	0.919806	1	0.00423084	0	0	0.0163547	0.0150302	0.00411194
EVX2	ENSG00000174279	0.117828	1.81249	0.85797	0.0878782	0.919806	1	0.403552	0.380849	0.191605	0.207183	0.179204	0.183849
MFSD1	ENSG00000118855	1.897	1.39111	0.476236	0.0878452	0.919806	1	7.149	4.2448	4.45177	6.04639	2.54872	3.55782
SAP30L-AS1	ENSG00000245275	0.0530634	-1.67721	-0.746067	0.0878864	0.919806	1	0.122941	0.0721931	0.0622636	0.186135	0.101909	0.171263
PTPRE	ENSG00000132334	0.0380406	1.79898	0.847182	0.0879082	0.919806	1	0.117944	0.0435341	0.150904	0.0866252	0.02933	0.0733628
SKAP2	ENSG00000005020	0.0272002	2.55362	1.35254	0.0881352	0.919932	1	0.118643	0.024882	0.0869681	0.066883	0.0175619	0.00960911
TIMM23	ENSG00000265354	37.5569	1.32275	0.403538	0.0880035	0.919932	1	133.134	82.8004	96.0254	105.459	64.4014	81.6872
KDM6B	ENSG00000132510	5.13904	-1.32737	-0.408569	0.0880932	0.919932	1	11.3194	10.825	8.98158	11.2001	14.5803	18.2834
MT-CYB	ENSG00000198727	6877.96	1.33597	0.417883	0.0881243	0.919932	1	11601.3	20232.6	22645.6	14124	17565.5	13603.6
PANDAR	ENSG00000281450	0.0888388	-2.79197	-1.48128	0.0881945	0.920063	1	0.105586	0.0590493	0.0844325	0.0340125	0.375097	0.342061
KTN1-AS1	ENSG00000186615	7.4263	-1.32548	-0.406511	0.0883115	0.920308	1	13.7067	17.1707	13.5937	17.7793	20.4824	25.481
AC092296.2	ENSG00000267053	0.0527056	-2.08063	-1.05702	0.0882968	0.920308	1	0.088361	0.0317676	0.0807528	0.146386	0.112109	0.196292
CABP5	ENSG00000105507	0.305909	1.99681	0.9977	0.0884196	0.920461	1	1.0616	0.40287	1.07125	0.439681	0.269383	0.63871
PSMA7	ENSG00000101182	36.2217	1.38271	0.467497	0.0883822	0.920461	1	140.557	70.0462	92.7779	93.4115	52.3411	85.828
PRDX6	ENSG00000117592	87.3345	1.26893	0.343617	0.0886201	0.920602	1	285.616	204.927	229.918	263.694	189.154	158.623
AC009487.1	ENSG00000224076	0.139316	-3.41348	-1.77124	0.0884962	0.920602	1	0	0.143664	0.136947	0.0827509	0.988645	0.083222
MRM2	ENSG00000122687	9.93641	1.28542	0.362244	0.0885912	0.920602	1	27.2899	27.8387	25.7661	26.1579	25.5544	16.721
MYL6B	ENSG00000196465	12.567	-1.29215	-0.369776	0.088597	0.920602	1	23.3387	27.0277	26.7264	41.9967	24.9746	41.7142
MCM6	ENSG00000076003	31.0014	1.40169	0.487164	0.0888675	0.920886	1	116.775	61.1529	80.9981	91.4331	39.8	65.2807
NDUFB4	ENSG00000065518	11.1785	1.30249	0.381273	0.0888423	0.920886	1	41.172	22.0544	29.9428	33.2389	19.0355	23.9047
PLAC8	ENSG00000145287	0.233982	1.80555	0.852435	0.0888583	0.920886	1	0.71534	0.588546	0.616031	0.518477	0.256571	0.374359
NACC1	ENSG00000160877	10.6682	1.25528	0.328004	0.0888812	0.920886	1	34.9182	27.7995	25.3004	30.4676	24.8196	20.0358
LINC00629	ENSG00000227060	0.191382	-1.84627	-0.884616	0.0887582	0.920886	1	0.302448	0.269576	0.256971	0.548033	0.31898	0.789986
AP005131.7	ENSG00000272746	0.120498	3.06207	1.61451	0.0889594	0.921212	1	0.433748	0.291091	0.27748	0	0	0.337247
CCDC30	ENSG00000186409	0.0522545	-1.51417	-0.59853	0.0896663	0.921225	1	0.0883189	0.102314	0.0823959	0.115834	0.183025	0.147149
AL451062.3	ENSG00000284989	0.866781	-1.74984	-0.807222	0.0890135	0.921225	1	1.20792	0.693891	1.92135	2.96907	3.70814	0.701832
AFF3	ENSG00000144218	0.262778	1.58923	0.668327	0.0897036	0.921225	1	1.06617	0.6928	0.451999	0.415409	0.499004	0.536197
AC079834.2	ENSG00000272944	0.0683887	-2.24246	-1.16508	0.0892867	0.921225	1	0.163173	0.0228138	0.0652413	0.210253	0.217379	0.158587
AC136604.3	ENSG00000250999	0.291824	-1.92997	-0.94858	0.0896822	0.921225	1	0.41708	0.583136	0.194555	0.839718	1.17301	0.472919
AC107959.4	ENSG00000284948	0.141372	2.19077	1.13144	0.0892719	0.921225	1	0.384087	0.322204	0.443644	0.329938	0.113707	0.124431
ZNF511	ENSG00000198546	4.89022	1.3748	0.459224	0.0896442	0.921225	1	16.7186	10.6255	13.147	15.3064	8.20568	8.1919
AC127526.4	ENSG00000287312	0.0332984	5.37931	2.42742	0.0892809	0.921225	1	0.13556	0	0.144536	0.0436682	0	0
DDX11-AS1	ENSG00000245614	0.120882	-2.04795	-1.03418	0.0890708	0.921225	1	0.325344	0.136463	0.0433607	0.262009	0.252831	0.527002
AL138976.2	ENSG00000259775	0.875638	-1.79083	-0.840627	0.0895655	0.921225	1	2.06211	1.34546	0.610736	2.7309	3.05239	1.70725
RFWD3	ENSG00000168411	11.7282	1.29219	0.369822	0.0896186	0.921225	1	41.8876	24.8354	30.7581	32.768	18.878	28.6298
AC092384.3	ENSG00000261226	0.153196	2.13695	1.09556	0.0893401	0.921225	1	0.830205	0.325007	0.177035	0.285265	0.0983113	0.251028
JPT1	ENSG00000189159	19.9825	1.33475	0.416567	0.0896571	0.921225	1	73.5613	36.5138	56.4595	54.4562	35.769	42.4397
ZNF493	ENSG00000196268	1.88876	-1.2654	-0.339593	0.0895212	0.921225	1	5.40249	3.36633	3.37146	5.25749	5.36905	5.59061
AC093227.1	ENSG00000267152	0.918689	-1.84419	-0.882988	0.0891104	0.921225	1	1.59791	1.34046	1.02846	5.19761	1.59223	1.2121
NF2	ENSG00000186575	8.02798	1.24396	0.314942	0.089709	0.921225	1	28.7607	18.8936	19.0939	23.0336	16.5831	17.5269
LRRIQ4	ENSG00000188306	0.0834645	2.41628	1.27279	0.0898557	0.921458	1	0.20308	0.146023	0.32479	0.0841097	0.154597	0.0563924
SNHG15	ENSG00000232956	8.72389	1.2799	0.356028	0.089803	0.921458	1	22.9294	23.818	24.0602	18.9599	25.7543	15.3667
OTUB1	ENSG00000167770	10.8122	1.25239	0.324688	0.0898721	0.921458	1	30.4455	30.3232	27.4121	28.0209	27.6485	20.6309
LNCTAM34A	ENSG00000234546	0.524917	-1.67144	-0.741093	0.0910441	0.921558	1	1.03978	0.685341	0.791875	1.14839	2.0668	1.25117
MUL1	ENSG00000090432	4.01698	1.31921	0.399677	0.093509	0.921558	1	11.6356	9.26641	11.923	10.4429	9.32576	7.17128
LINC01635	ENSG00000228397	0.0984311	-2.39267	-1.25862	0.0913848	0.921558	1	0.133511	0.0280001	0.160145	0.161281	0.44466	0.227079
ADAMTSL4	ENSG00000143382	0.0105754	2.83813	1.50494	0.0940198	0.921558	1	0.0412033	0.0276518	0.0197692	0	0.0146377	0.0160182
DNM3	ENSG00000197959	0.0147395	-2.17269	-1.11948	0.091279	0.921558	1	0.0233931	0.0156992	0.0149652	0.0406925	0.0747943	0.00909426
SLC1A4	ENSG00000115902	2.48559	-1.653	-0.725088	0.0911658	0.921558	1	3.41345	4.29203	4.27454	3.39468	6.76178	11.1326
POLE4	ENSG00000115350	9.39854	1.30298	0.381816	0.0909297	0.921558	1	32.783	23.0102	22.1674	27.3786	16.7115	19.8588
AC007405.3	ENSG00000239467	0.296626	-1.83707	-0.877406	0.0937868	0.921558	1	0.456144	0.306121	0.525254	0.916897	0.58337	1.06398
KCNJ13	ENSG00000115474	0.0231405	2.87239	1.52225	0.0912289	0.921558	1	0.11662	0.0244577	0.0582853	0.0140877	0.0388405	0.0141679
LSM3	ENSG00000170860	12.6439	1.35727	0.440708	0.0916512	0.921558	1	49.422	25.6407	30.915	38.3371	22.7315	21.8848
GALNT15	ENSG00000131386	0.0153552	-2.70412	-1.43516	0.09251	0.921558	1	0.00828058	0	0.0331082	0.0560162	0.0514799	0.0241436
AC092040.1	ENSG00000241111	0.678991	-1.66039	-0.731526	0.0918219	0.921558	1	1.71927	1.0048	0.703703	2.25207	0.622356	3.04097
ADD1	ENSG00000087274	9.18266	1.27724	0.353025	0.0909375	0.921558	1	30.0825	19.968	25.7092	26.9649	17.6099	19.1889
RFC1	ENSG00000035928	20.3388	-1.27584	-0.351447	0.0943156	0.921558	1	50.1877	41.2611	37.9819	44.4683	49.0294	81.4157
SMIM14	ENSG00000163683	0.66074	-1.34304	-0.425507	0.0922853	0.921558	1	1.55918	1.11722	1.29227	1.85209	1.50737	2.33618
UCHL1	ENSG00000154277	74.4632	1.35352	0.436714	0.0942997	0.921558	1	241.316	164.459	208.027	196.838	121.622	168.105
POLR2B	ENSG00000047315	27.3499	1.28283	0.359327	0.0941039	0.921558	1	109.463	54.8423	65.4663	81.6731	49.432	58.1079
STPG2	ENSG00000163116	0.103081	-1.90752	-0.931698	0.0948319	0.921558	1	0.122129	0.168314	0.132541	0.160177	0.426121	0.288264
CLCN3	ENSG00000109572	11.8755	-1.27059	-0.345494	0.093799	0.921558	1	31.4446	21.6131	23.1035	31.1766	26.2106	44.991
TRIML2	ENSG00000179046	0.069233	-2.42884	-1.28027	0.0901464	0.921558	1	0.10427	0.0583136	0.0694838	0.117561	0.0771717	0.405359
MED10	ENSG00000133398	5.57396	1.33054	0.412013	0.0929822	0.921558	1	17.6301	12.3087	15.9172	14.7843	8.23302	14.0117
AC008937.3	ENSG00000271828	0.0887446	-2.30587	-1.20531	0.094408	0.921558	1	0	0.183087	0.0997296	0.241049	0.27691	0.242421
AC008629.1	ENSG00000249494	0.0214652	-3.10316	-1.63374	0.0932477	0.921558	1	0.0306677	0.0171511	0.00817456	0.0296371	0.0363161	0.119223
AC011346.1	ENSG00000247199	0.0959382	-1.63009	-0.704948	0.0934769	0.921558	1	0.25797	0.118579	0.113034	0.256131	0.204004	0.367494
CYFIP2	ENSG00000055163	3.45798	-1.29762	-0.375865	0.0941103	0.921558	1	8.88112	4.61244	8.01837	9.98304	9.46606	10.2705
ZBED8	ENSG00000221886	1.63197	-1.49715	-0.582214	0.092188	0.921558	1	4.13806	2.88508	1.91189	4.95877	3.8875	5.21937
RAB24	ENSG00000169228	3.58065	-1.37268	-0.456999	0.0945846	0.921558	1	6.49395	7.81621	6.26027	8.65703	12.4925	9.42976
ZFP62	ENSG00000196670	9.07031	-1.30527	-0.384344	0.0924758	0.921558	1	20.2822	24.0066	11.1593	21.1994	32.0786	24.1432
AL138831.1	ENSG00000230648	0.976817	-2.16593	-1.11499	0.0940337	0.921558	1	1.52165	0.850988	1.2168	1.96068	2.25238	4.19017
KLHDC3	ENSG00000124702	22.8281	1.25686	0.329823	0.0937	0.921558	1	69.5169	59.5718	58.1719	66.0138	43.7172	51.0297
Z95118.2	ENSG00000286511	0.078003	2.62369	1.3916	0.0920575	0.921558	1	0.0422006	0.371714	0.185604	0.16313	0.0562198	0.0410147
SLC35F1	ENSG00000196376	2.62441	1.27828	0.354206	0.0943271	0.921558	1	7.6963	5.51782	8.25006	6.67689	5.86019	5.60749
PRR18	ENSG00000176381	0.075765	-2.02309	-1.01656	0.0944464	0.921558	1	0.117824	0.127081	0.0538394	0.227729	0.16444	0.261744
AC093627.5	ENSG00000242474	1.18444	-1.46076	-0.546718	0.090993	0.921558	1	3.22486	1.94248	1.47963	3.40259	3.47449	3.28837
AC091729.3	ENSG00000229043	1.61074	-1.4474	-0.533459	0.0936253	0.921558	1	4.4431	2.28695	2.43976	4.87676	3.56486	5.45699
GNGT1	ENSG00000127928	72.9479	1.31068	0.390319	0.0947583	0.921558	1	280.769	165.05	164.735	196.191	99.0982	195.853
AC064807.4	ENSG00000272024	0.184966	-3.03565	-1.60201	0.0900178	0.921558	1	0.260462	0.109248	0.10414	0.629273	0.578313	0.379713
ARFGEF1	ENSG00000066777	13.1339	-1.25025	-0.322216	0.0905817	0.921558	1	29.9217	28.9887	25.2187	34.3122	35.2624	43.2742
EYA1	ENSG00000104313	0.00547704	3.95918	1.9852	0.0941736	0.921558	1	0.0170577	0.0143094	0.0136403	0.00549483	0	0.00552611
CALB1	ENSG00000104327	0.0448823	-1.73124	-0.791802	0.0912368	0.921558	1	0.133661	0.031146	0.0534416	0.0645847	0.138494	0.180423
AP003692.1	ENSG00000254307	0.0849733	-2.5538	-1.35264	0.094513	0.921558	1	0.0485829	0.0815107	0.116549	0.281702	0.258889	0.188871
NDUFB9	ENSG00000147684	10.4222	1.2477	0.319273	0.0948737	0.921558	1	33.0597	24.6578	28.0468	26.7342	20.6024	26.3218
LINGO2	ENSG00000174482	0.0359827	2.68555	1.42522	0.0944061	0.921558	1	0.0456931	0.102216	0.133976	0	0.0676361	0.044409
TLE1	ENSG00000196781	3.0377	1.26107	0.334649	0.0906222	0.921558	1	10.2137	7.80799	7.09712	7.50233	6.84906	6.89461
C9orf153	ENSG00000187753	0.0908177	-2.1365	-1.09525	0.0913	0.921558	1	0.0362049	0.212602	0.0723789	0.227424	0.385858	0.158344
WDR34	ENSG00000119333	7.12264	1.32168	0.402376	0.0923663	0.921558	1	21.739	20.1318	16.5699	18.9037	12.5822	16.123
AGPAT2	ENSG00000169692	2.86788	1.47281	0.558567	0.0940265	0.921558	1	10.4446	6.79582	6.64002	9.56234	4.59955	3.28995
PNPLA7	ENSG00000130653	0.0585299	-1.84158	-0.880946	0.0903684	0.921558	1	0.13998	0.0270985	0.0947153	0.130073	0.157792	0.214534
ASB13	ENSG00000196372	12.9007	1.26527	0.339442	0.0945387	0.921558	1	33.4297	36.2909	34.8904	36.9118	30.3485	23.1069
AL355334.2	ENSG00000286445	0.187347	-2.56551	-1.35924	0.094543	0.921558	1	0.269056	0.0902824	0.215153	0.156009	1.147	0.261495
TNKS2-AS1	ENSG00000228701	0.539344	-1.93634	-0.953334	0.0946136	0.921558	1	0.478471	0.891958	0.765227	1.02754	2.50247	1.03339
FGFR2	ENSG00000066468	4.67104	1.24482	0.315935	0.090099	0.921558	1	15.8914	11.3889	11.3821	13.6405	10.3679	9.25193
TNNI2	ENSG00000130598	0.297915	-2.49731	-1.32037	0.0925505	0.921558	1	0.097255	0.285549	0.50551	1.83274	0.215939	0.567131
SYT7	ENSG00000011347	0.997972	1.55972	0.641286	0.09187	0.921558	1	4.80802	1.82995	1.91527	2.52973	1.69225	1.4711
STAT6	ENSG00000166888	0.0428312	-1.71834	-0.781013	0.0946147	0.921558	1	0.0798909	0.0913896	0.0290388	0.0631687	0.199961	0.0988219
TBX3	ENSG00000135111	0.00583546	-16.176	-4.01579	0.092441	0.921558	1	0	0	0	0	0.0315938	0.0172867
AL354809.1	ENSG00000273507	0.058819	-1.87902	-0.909981	0.0938996	0.921558	1	0.0432495	0.139543	0.0558679	0.0964527	0.277744	0.122869
AL158195.1	ENSG00000286191	0.310606	-1.77307	-0.826247	0.0914674	0.921558	1	0.44068	0.410754	0.52859	0.757104	1.10892	0.785208
PCDH9	ENSG00000184226	0.11905	-1.50487	-0.589641	0.0940651	0.921558	1	0.275777	0.260083	0.10273	0.339345	0.41379	0.264697
EGLN3	ENSG00000129521	0.150124	-1.56785	-0.648785	0.0922268	0.921558	1	0.309544	0.26571	0.189964	0.264358	0.677702	0.32883
MIA2	ENSG00000150527	1.86907	-1.32141	-0.402074	0.0906623	0.921558	1	3.83737	3.58194	3.93326	4.36942	4.27018	7.45417
FRMD6-AS1	ENSG00000273888	0.552682	-1.65849	-0.729871	0.0939059	0.921558	1	1.42676	0.59844	0.722581	1.72351	1.35163	1.6871
LGALS3	ENSG00000131981	1.12361	1.75042	0.807703	0.0928409	0.921558	1	5.15819	1.73893	2.67919	2.77195	1.86244	1.10104
AL391152.1	ENSG00000258592	0.103176	-2.11249	-1.07895	0.0941962	0.921558	1	0.201664	0.112781	0.0806311	0.259849	0.298508	0.326661
ZNF839	ENSG00000022976	2.60122	-1.3082	-0.387588	0.0906946	0.921558	1	5.6133	5.63159	4.61763	7.10155	7.57069	7.64883
EHD4	ENSG00000103966	1.01765	1.47664	0.562316	0.0903804	0.921558	1	2.80387	2.91753	2.56553	3.07441	2.1969	0.89089
SORD	ENSG00000140263	20.08	1.26362	0.337557	0.0927386	0.921558	1	70.5383	43.404	52.7131	58.3058	34.6288	47.7453
UBE2I	ENSG00000103275	7.9583	1.26731	0.34177	0.0930837	0.921558	1	30.5963	17.0336	18.9699	24.1102	15.9938	15.6689
AC009088.1	ENSG00000260060	0.476994	1.94966	0.963225	0.0932924	0.921558	1	2.41795	0.32027	1.37383	0.983872	0.452098	0.742105
NQO1	ENSG00000181019	3.67975	1.43063	0.516655	0.0942738	0.921558	1	13.0949	8.66534	8.81656	8.93081	6.60726	7.21306
ERAL1	ENSG00000132591	15.6138	1.27853	0.354487	0.0929663	0.921558	1	45.9762	41.6652	40.1145	44.9572	37.1344	26.2862
COPRS	ENSG00000172301	26.2126	1.30119	0.379828	0.0932402	0.921558	1	73.4522	74.4508	65.806	71.5039	63.3921	43.6696
AC125257.1	ENSG00000259623	0.880053	1.91763	0.939323	0.0930342	0.921558	1	3.03914	0.910528	3.34162	1.39858	1.46205	1.19556
AC015813.3	ENSG00000266290	0.0294003	-2.3266	-1.21822	0.0937562	0.921558	1	0.0260121	0.0436422	0.0277344	0.0670346	0.107811	0.0758433
TTYH2	ENSG00000141540	11.3525	1.26679	0.341174	0.0911788	0.921558	1	33.13	26.0949	33.5941	32.8065	24.4226	22.2409
AC015802.1	ENSG00000267078	0.093265	2.61536	1.38701	0.0948788	0.921558	1	0.438956	0.15343	0.204759	0.106051	0.162439	0.0355517
HGS	ENSG00000185359	6.14894	1.25289	0.325258	0.0904001	0.921558	1	24.0827	12.1335	15.332	16.7184	12.2492	14.4341
C18orf32	ENSG00000177576	1.44876	1.36751	0.451551	0.0914263	0.921558	1	4.05379	4.01261	3.74377	3.38213	2.92782	3.03343
[truncated: 17,697 more rows]
